# Supplementary material
Source: MDPI journal article supplement (https://www.mdpi.com/2073-4336/8/4/45)
Supplement: s1 [file s1]

Archive with 58 entries (45 files):
- Part 1 - Data/
- Part 1 - Data/Microgrid Load (Pecan Street)/
- Part 1 - Data/Microgrid Load (Pecan Street)/subquery_summer(sum).xlsx
- Part 1 - Data/Microgrid Load (Pecan Street)/subquery_winter(sum).xlsx
- Part 1 - Data/Microgrid Load (Pecan Street)/~$subquery_winter(sum).xlsx
- Part 1 - Data/Solar irradiation (NREL)/
- Part 1 - Data/Solar irradiation (NREL)/austin_ghi2012.csv
- Part 2 - Data Analysis/
- Part 2 - Data Analysis/Joint Generation (Interconnection)/
- Part 2 - Data Analysis/Joint Generation (Interconnection)/jointgen_analysis.xlsx
- Part 2 - Data Analysis/Joint Generation (Interconnection)/~$joint_calculation(SCC)_v1.xlsx
- Part 2 - Data Analysis/Joint Generation (Interconnection)/~$joint_calculation(SCC)_v5.3.xlsx
- Part 2 - Data Analysis/Microgrid (Mueller)/
- Part 2 - Data Analysis/Microgrid (Mueller)/mueller_analysis.xlsx
- Part 2 - Data Analysis/Utility (Taipower)/
- Part 2 - Data Analysis/Utility (Taipower)/utility_analysis.xlsx
- Part 3 - Operations Research/
- Part 3 - Operations Research/joint_scc(nostorage)/
- Part 3 - Operations Research/joint_scc(nostorage)/.oplproject
- Part 3 - Operations Research/joint_scc(nostorage)/.project
- Part 3 - Operations Research/joint_scc(nostorage)/joint_gen.mod
- Part 3 - Operations Research/joint_scc(nostorage)/joint_quadratic.mod
- Part 3 - Operations Research/joint_scc(nostorage)/joint_quadratic_nostorage.mod
- Part 3 - Operations Research/joint_scc(nostorage)/joint_summer(sum).dat
- Part 3 - Operations Research/joint_scc(nostorage)/joint_winter(sum).dat
- Part 3 - Operations Research/joint_scc(storage)/
- Part 3 - Operations Research/joint_scc(storage)/.oplproject
- Part 3 - Operations Research/joint_scc(storage)/.project
- Part 3 - Operations Research/joint_scc(storage)/joint_gen.mod
- Part 3 - Operations Research/joint_scc(storage)/joint_quadratic.mod
- Part 3 - Operations Research/joint_scc(storage)/joint_quadratic_storage.mod
- Part 3 - Operations Research/joint_scc(storage)/joint_summer_storage.dat
- Part 3 - Operations Research/joint_scc(storage)/joint_winter_storage.dat
- Part 3 - Operations Research/scc90_utility/
- Part 3 - Operations Research/scc90_utility/.oplproject
- Part 3 - Operations Research/scc90_utility/.project
- Part 3 - Operations Research/scc90_utility/scc90.mod
- Part 3 - Operations Research/scc90_utility/scc90_summer.dat
- Part 3 - Operations Research/scc90_utility/scc90_winter.dat
- Part 3 - Operations Research/thesis_mg_case1/
- Part 3 - Operations Research/thesis_mg_case1/.oplproject
- Part 3 - Operations Research/thesis_mg_case1/.project
- Part 3 - Operations Research/thesis_mg_case1/case1_summer.dat
- Part 3 - Operations Research/thesis_mg_case1/case1_winter.dat
- Part 3 - Operations Research/thesis_mg_case1/mg_case1.mod
- Part 3 - Operations Research/thesis_mg_case1/mg_case1_new.mod
- Part 3 - Operations Research/thesis_mg_case1/mg_case1_quadratic.mod
- Part 3 - Operations Research/thesis_mg_case2/
- Part 3 - Operations Research/thesis_mg_case2/.oplproject
- Part 3 - Operations Research/thesis_mg_case2/.project
- Part 3 - Operations Research/thesis_mg_case2/case2_summer(quadratic).dat
- Part 3 - Operations Research/thesis_mg_case2/case2_summer.dat
- Part 3 - Operations Research/thesis_mg_case2/case2_winter(quadratic).dat
- Part 3 - Operations Research/thesis_mg_case2/case2_winter.dat
- Part 3 - Operations Research/thesis_mg_case2/mg_case2.mod
- Part 3 - Operations Research/thesis_mg_case2/mg_case2_new.mod
- Part 3 - Operations Research/thesis_mg_case2/mg_case2_quadratic.mod
- Readme - Supplementary Material.pdf
