# Supplementary material
Source: MDPI journal article supplement (https://www.mdpi.com/2073-4336/8/4/45)
Supplement: s1 [file s1 › Part 1 - Data/Microgrid Load (Pecan Street)/subquery_summer(sum).xlsx]

## Sheet: mean_daily_load
localhour	mean(sum_use)	sd(sum_use)	mean(sum_grid)	sd(sum_grid)	mean(sum_gen)	sd(sum_gen)
00:00:00	602.043	103.52	597.527	102.482	4.51515	2.84433
01:00:00	516.191	92.5176	512.447	92.229	3.74451	2.55169
02:00:00	463.113	84.7116	459.788	84.2893	3.32545	2.45681
03:00:00	430.021	78.8843	426.736	78.2569	3.28578	2.09765
04:00:00	403.615	73.2776	400.687	72.6355	2.92716	1.9295
05:00:00	381.108	67.263	378.393	66.6948	2.71441	1.87666
06:00:00	384.04	59.3578	380.79	59.0559	3.24988	1.95463
07:00:00	406.168	57.4613	376.798	60.7906	29.3697	10.5585
08:00:00	415.674	45.0673	314.551	51.2973	101.124	21.2841
09:00:00	441.205	62.5067	233.807	63.8376	207.398	43.9687
10:00:00	496.583	77.7226	148.671	74.8994	347.912	76.726
11:00:00	568.004	97.1871	103.973	107.892	464.031	109.582
12:00:00	649.897	116.743	116.425	114.034	533.472	126.362
13:00:00	725.099	137.553	138.046	119.798	587.053	126.813
14:00:00	799.04	152.51	206.32	125.383	592.72	120.222
15:00:00	879.513	161.164	307.854	157.029	571.658	100.987
16:00:00	952.222	157.602	470.038	134.203	482.184	104.403
17:00:00	1023.13	152.617	659	140.703	364.131	86.3562
18:00:00	1050.72	156.182	837.584	149.733	213.133	59.9652
19:00:00	1013.92	151.017	937.178	152.745	76.74	32.1795
20:00:00	981.163	143.871	971.212	143.968	9.951	5.78441
21:00:00	944.92	130.159	937.397	129.632	7.52273	3.9164
22:00:00	858.617	116.695	850.5	116	8.11703	3.40126
23:00:00	719.929	108.438	714.98	107.895	4.94862	3.28717

## Sheet: subquery_summer(sum)
localhour	sum_grid	sum_use	sum_gen
2014-06-01	492.486	493.706	1.2202
2014-06-01 01:00:00	412.191	415.781	3.58925
2014-06-01 02:00:00	376.521	377.673	1.1518
2014-06-01 03:00:00	323.276	324.369	1.09287
2014-06-01 04:00:00	286.554	287.47	0.915917
2014-06-01 05:00:00	269.083	270.145	1.06178
2014-06-01 06:00:00	262.678	263.535	0.856917
2014-06-01 07:00:00	254.466	288.312	33.8462
2014-06-01 08:00:00	245.485	349.036	103.551
2014-06-01 09:00:00	189.937	401.776	211.839
2014-06-01 10:00:00	104.427	453.173	348.746
2014-06-01 11:00:00	119.268	547.732	428.464
2014-06-01 12:00:00	104.396	603.423	499.027
2014-06-01 13:00:00	131.745	702.154	570.409
2014-06-01 14:00:00	227.552	762.31	534.758
2014-06-01 15:00:00	224.952	815.924	590.971
2014-06-01 16:00:00	425.002	818.093	393.091
2014-06-01 17:00:00	472.471	872.427	399.956
2014-06-01 18:00:00	669.725	913.183	243.458
2014-06-01 19:00:00	767.526	866.076	98.5496
2014-06-01 20:00:00	857.253	864.609	7.3557
2014-06-01 21:00:00	829.409	835.451	6.04185
2014-06-01 22:00:00	753.712	763.714	10.0023
2014-06-01 23:00:00	618.508	623.023	4.51535
2014-06-02	506.688	510.909	4.22062
2014-06-02 01:00:00	422.759	425.55	2.79103
2014-06-02 02:00:00	368.228	370.997	2.76835
2014-06-02 03:00:00	346.41	348.078	1.66747
2014-06-02 04:00:00	317.95	320.653	2.70292
2014-06-02 05:00:00	316.901	318.789	1.8881
2014-06-02 06:00:00	351.329	352.768	1.43895
2014-06-02 07:00:00	353.649	391.333	37.6838
2014-06-02 08:00:00	278.494	373.958	95.4643
2014-06-02 09:00:00	145.728	376.254	230.526
2014-06-02 10:00:00	-3.36385	409.646	413.01
2014-06-02 11:00:00	-41.4444	459.096	500.541
2014-06-02 12:00:00	-54.2638	524.283	578.547
2014-06-02 13:00:00	-41.8787	577.3	619.179
2014-06-02 14:00:00	5.11618	665.898	660.782
2014-06-02 15:00:00	122.494	729.685	607.191
2014-06-02 16:00:00	317.923	825.957	508.034
2014-06-02 17:00:00	542.487	927.196	384.709
2014-06-02 18:00:00	776.342	993.295	216.953
2014-06-02 19:00:00	863.088	969.651	106.564
2014-06-02 20:00:00	930.521	941.728	11.2072
2014-06-02 21:00:00	905.528	916.646	11.1179
2014-06-02 22:00:00	781.01	787.64	6.62993
2014-06-02 23:00:00	650.593	655.642	5.04905
2014-06-03	500.23	501.291	1.06108
2014-06-03 01:00:00	442.641	443.126	0.4854
2014-06-03 02:00:00	411.804	414.63	2.82627
2014-06-03 03:00:00	361.743	362.622	0.878783
2014-06-03 04:00:00	338.678	339.807	1.12843
2014-06-03 05:00:00	320.958	321.437	0.47905
2014-06-03 06:00:00	355.24	357.631	2.39163
2014-06-03 07:00:00	379.418	401.325	21.9075
2014-06-03 08:00:00	254.793	369.672	114.879
2014-06-03 09:00:00	184.105	363.319	179.214
2014-06-03 10:00:00	133.137	407.642	274.505
2014-06-03 11:00:00	-21.9146	459.279	481.193
2014-06-03 12:00:00	57.9226	508.369	450.446
2014-06-03 13:00:00	-21.5556	574.156	595.712
2014-06-03 14:00:00	81.3196	634.019	552.699
2014-06-03 15:00:00	212.053	702.938	490.885
2014-06-03 16:00:00	339.641	788.725	449.084
2014-06-03 17:00:00	508.879	886.23	377.351
2014-06-03 18:00:00	710.442	934.256	223.815
2014-06-03 19:00:00	808.318	909.701	101.384
2014-06-03 20:00:00	872.565	881.578	9.01285
2014-06-03 21:00:00	849.232	855.014	5.78198
2014-06-03 22:00:00	779.786	784.646	4.8597
2014-06-03 23:00:00	645.596	645.801	0.204967
2014-06-04	521.397	524.276	2.87893
2014-06-04 01:00:00	440.596	442.105	1.5089
2014-06-04 02:00:00	394.326	396.202	1.87613
2014-06-04 03:00:00	354.814	356.325	1.51125
2014-06-04 04:00:00	319.871	319.928	0.0567167
2014-06-04 05:00:00	304.882	305.159	0.2768
2014-06-04 06:00:00	341.497	344.266	2.7694
2014-06-04 07:00:00	349.875	381.713	31.8376
2014-06-04 08:00:00	249.962	346.751	96.7893
2014-06-04 09:00:00	185.966	354.305	168.339
2014-06-04 10:00:00	73.6078	383.605	309.998
2014-06-04 11:00:00	6.89722	428.988	422.091
2014-06-04 12:00:00	38.0975	481.418	443.321
2014-06-04 13:00:00	87.6804	551.84	464.16
2014-06-04 14:00:00	105.325	598.72	493.395
2014-06-04 15:00:00	110.928	663.775	552.847
2014-06-04 16:00:00	261.349	775.75	514.402
2014-06-04 17:00:00	493.146	878.707	385.561
2014-06-04 18:00:00	683.589	916.099	232.51
2014-06-04 19:00:00	807.841	909.76	101.92
2014-06-04 20:00:00	865.154	872.631	7.4767
2014-06-04 21:00:00	857.092	858.529	1.43728
2014-06-04 22:00:00	786.958	792.874	5.9156
2014-06-04 23:00:00	636.207	639.301	3.09423
2014-06-05	524.364	526.538	2.17433
2014-06-05 01:00:00	441.524	444.35	2.8269
2014-06-05 02:00:00	399.528	401.08	1.5518
2014-06-05 03:00:00	365.51	367.264	1.75375
2014-06-05 04:00:00	335.77	336.843	1.07333
2014-06-05 05:00:00	328.454	328.709	0.254467
2014-06-05 06:00:00	348.087	347.13	-0.956367
2014-06-05 07:00:00	346.711	389.976	43.2652
2014-06-05 08:00:00	267.721	376.537	108.816
2014-06-05 09:00:00	195.437	357.814	162.377
2014-06-05 10:00:00	180.192	383.051	202.859
2014-06-05 11:00:00	185.095	444.62	259.525
2014-06-05 12:00:00	76.2659	471.345	395.079
2014-06-05 13:00:00	110.655	532.517	421.862
2014-06-05 14:00:00	77.5959	616.311	538.715
2014-06-05 15:00:00	121.101	665.273	544.172
2014-06-05 16:00:00	412.051	736.73	324.679
2014-06-05 17:00:00	537.598	822.607	285.009
2014-06-05 18:00:00	641.562	861.122	219.559
2014-06-05 19:00:00	784.934	876.764	91.83
2014-06-05 20:00:00	887.356	896.943	9.58698
2014-06-05 21:00:00	874.448	881.469	7.02128
2014-06-05 22:00:00	804.068	808.878	4.81028
2014-06-05 23:00:00	663.318	665.853	2.53535
2014-06-06	545.698	549.632	3.93333
2014-06-06 01:00:00	452.715	455.431	2.71573
2014-06-06 02:00:00	410.204	412.366	2.16267
2014-06-06 03:00:00	377.641	380.898	3.25727
2014-06-06 04:00:00	350.708	352.819	2.1109
2014-06-06 05:00:00	322.633	322.569	-0.06405
2014-06-06 06:00:00	332.58	335.112	2.532
2014-06-06 07:00:00	336.866	374.766	37.8999
2014-06-06 08:00:00	289.683	394.795	105.113
2014-06-06 09:00:00	181.849	389.458	207.609
2014-06-06 10:00:00	52.04	431.948	379.908
2014-06-06 11:00:00	31.8663	490.658	458.792
2014-06-06 12:00:00	80.7313	564.692	483.961
2014-06-06 13:00:00	112.948	599.012	486.064
2014-06-06 14:00:00	87.6587	671.925	584.266
2014-06-06 15:00:00	228.961	740.932	511.971
2014-06-06 16:00:00	443.439	818.918	375.479
2014-06-06 17:00:00	679.12	921.091	241.97
2014-06-06 18:00:00	724.208	907.164	182.955
2014-06-06 19:00:00	786.025	879.737	93.7123
2014-06-06 20:00:00	853.772	860.068	6.29578
2014-06-06 21:00:00	856.834	855.426	-1.40858
2014-06-06 22:00:00	779.355	783.212	3.85657
2014-06-06 23:00:00	669.245	669.079	-0.1661
2014-06-07	548.736	549.881	1.14433
2014-06-07 01:00:00	446.38	446.3	-0.0805833
2014-06-07 02:00:00	405.54	406.677	1.13688
2014-06-07 03:00:00	365.2	365.912	0.712067
2014-06-07 04:00:00	359.458	359.462	0.00316667
2014-06-07 05:00:00	332.718	333.11	0.391833
2014-06-07 06:00:00	336.494	337.993	1.49932
2014-06-07 07:00:00	317.875	357.02	39.1456
2014-06-07 08:00:00	313.955	429.59	115.634
2014-06-07 09:00:00	240.14	474.7	234.56
2014-06-07 10:00:00	199.638	544.926	345.288
2014-06-07 11:00:00	61.8666	598.438	536.572
2014-06-07 12:00:00	138.188	680.438	542.25
2014-06-07 13:00:00	230.527	743.636	513.109
2014-06-07 14:00:00	285.233	845.477	560.244
2014-06-07 15:00:00	322.547	848.071	525.525
2014-06-07 16:00:00	468.026	916.526	448.5
2014-06-07 17:00:00	602.766	901.544	298.779
2014-06-07 18:00:00	714.748	923.444	208.695
2014-06-07 19:00:00	770.571	861.939	91.3677
2014-06-07 20:00:00	834.343	836.785	2.44205
2014-06-07 21:00:00	819.523	818.06	-1.463
2014-06-07 22:00:00	763.321	766.041	2.72
2014-06-07 23:00:00	657.701	662.874	5.17237
2014-06-08	557.858	558.862	1.00467
2014-06-08 01:00:00	463.762	464.996	1.23365
2014-06-08 02:00:00	435.636	436.933	1.29708
2014-06-08 03:00:00	388.586	389.244	0.6585
2014-06-08 04:00:00	374.304	375.65	1.34555
2014-06-08 05:00:00	347.589	348.107	0.51785
2014-06-08 06:00:00	351.92	351.426	-0.493217
2014-06-08 07:00:00	332.245	350.586	18.3412
2014-06-08 08:00:00	312.89	400.721	87.8307
2014-06-08 09:00:00	246.474	463.489	217.015
2014-06-08 10:00:00	133.966	515.327	381.36
2014-06-08 11:00:00	151.431	601.787	450.357
2014-06-08 12:00:00	374.553	653.233	278.68
2014-06-08 13:00:00	264.381	731.221	466.841
2014-06-08 14:00:00	216.278	785.519	569.241
2014-06-08 15:00:00	267.842	860.107	592.265
2014-06-08 16:00:00	410.599	895.249	484.649
2014-06-08 17:00:00	537.632	943.249	405.617
2014-06-08 18:00:00	696.755	949.129	252.374
2014-06-08 19:00:00	840.18	902.016	61.8354
2014-06-08 20:00:00	877.782	880.622	2.84063
2014-06-08 21:00:00	873.102	876.36	3.25723
2014-06-08 22:00:00	826.141	831.263	5.1219
2014-06-08 23:00:00	647.681	648.437	0.755817
2014-06-09	528.615	528.637	0.0219833
2014-06-09 01:00:00	457.516	458.907	1.39083
2014-06-09 02:00:00	410.982	409.073	-1.90913
2014-06-09 03:00:00	388.286	388.357	0.0716167
2014-06-09 04:00:00	365.676	367.687	2.01047
2014-06-09 05:00:00	360.499	359.944	-0.554233
2014-06-09 06:00:00	380.876	382.081	1.20417
2014-06-09 07:00:00	382.152	420.853	38.7004
2014-06-09 08:00:00	257.68	395.58	137.9
2014-06-09 09:00:00	278.049	395.743	117.694
2014-06-09 10:00:00	329.56	402.75	73.1895
2014-06-09 11:00:00	362.75	398.849	36.0988
2014-06-09 12:00:00	-2.23752	384.21	386.448
2014-06-09 13:00:00	-21.1816	437.774	458.955
2014-06-09 14:00:00	187.992	484.594	296.602
2014-06-09 15:00:00	-49.9943	533.503	583.497
2014-06-09 16:00:00	328.322	609.9	281.578
2014-06-09 17:00:00	550.45	687.294	136.844
2014-06-09 18:00:00	709.042	750.823	41.7813
2014-06-09 19:00:00	717.849	730.801	12.9517
2014-06-09 20:00:00	716.499	717.763	1.26327
2014-06-09 21:00:00	698.232	700.982	2.75003
2014-06-09 22:00:00	662.379	663.917	1.53823
2014-06-09 23:00:00	533.254	532.603	-0.650517
2014-06-10	419.713	421.803	2.08947
2014-06-10 01:00:00	351.618	351.22	-0.39775
2014-06-10 02:00:00	318.797	319.291	0.49445
2014-06-10 03:00:00	281.125	281.46	0.335183
2014-06-10 04:00:00	252.783	252.942	0.159133
2014-06-10 05:00:00	239.779	239.897	0.117667
2014-06-10 06:00:00	260.963	262.508	1.54518
2014-06-10 07:00:00	289.49	318.512	29.0219
2014-06-10 08:00:00	208.465	317.291	108.825
2014-06-10 09:00:00	66.396	321.257	254.861
2014-06-10 10:00:00	-80.012	346.175	426.187
2014-06-10 11:00:00	-205.289	359.031	564.32
2014-06-10 12:00:00	-259.287	392.212	651.5
2014-06-10 13:00:00	-228.886	461.231	690.118
2014-06-10 14:00:00	-164.166	521.692	685.858
2014-06-10 15:00:00	-31.6347	596.07	627.705
2014-06-10 16:00:00	192.496	731.52	539.024
2014-06-10 17:00:00	418.197	829.094	410.897
2014-06-10 18:00:00	655.46	906.026	250.566
2014-06-10 19:00:00	774.213	882.693	108.48
2014-06-10 20:00:00	861.252	866.878	5.62572
2014-06-10 21:00:00	809.445	812.012	2.56693
2014-06-10 22:00:00	724.143	725.345	1.20217
2014-06-10 23:00:00	577.209	577.885	0.675533
2014-06-11	431.864	430.88	-0.984433
2014-06-11 01:00:00	369.599	369.452	-0.147117
2014-06-11 02:00:00	322.103	322.33	0.227
2014-06-11 03:00:00	286.193	286.107	-0.0865333
2014-06-11 04:00:00	271.636	271.53	-0.105767
2014-06-11 05:00:00	248.996	249.277	0.2804
2014-06-11 06:00:00	274.266	275.767	1.50103
2014-06-11 07:00:00	277.509	308.403	30.8945
2014-06-11 08:00:00	218.114	324.324	106.21
2014-06-11 09:00:00	107.271	341.158	233.887
2014-06-11 10:00:00	3.54453	394.449	390.905
2014-06-11 11:00:00	-78.753	453.222	531.975
2014-06-11 12:00:00	-86.8385	536.198	623.037
2014-06-11 13:00:00	-70.009	592.221	662.23
2014-06-11 14:00:00	29.0128	694.224	665.212
2014-06-11 15:00:00	120.391	746.32	625.93
2014-06-11 16:00:00	330.565	865.393	534.827
2014-06-11 17:00:00	591.475	986.485	395.01
2014-06-11 18:00:00	775.712	1018.09	242.38
2014-06-11 19:00:00	934.135	998.293	64.1576
2014-06-11 20:00:00	971.067	977.855	6.78858
2014-06-11 21:00:00	910.569	911.836	1.2672
2014-06-11 22:00:00	887.577	890.09	2.51253
2014-06-11 23:00:00	747.729	747.611	-0.11805
2014-06-12	627.126	627.305	0.17885
2014-06-12 01:00:00	530.612	531.616	1.00335
2014-06-12 02:00:00	499.808	498.679	-1.12873
2014-06-12 03:00:00	452.339	453.472	1.1322
2014-06-12 04:00:00	443.615	442.913	-0.7021
2014-06-12 05:00:00	414.675	414.606	-0.06925
2014-06-12 06:00:00	394.144	396.862	2.71803
2014-06-12 07:00:00	375.465	431.447	55.982
2014-06-12 08:00:00	329.934	416.695	86.7607
2014-06-12 09:00:00	273.741	385.174	111.433
2014-06-12 10:00:00	133.34	418.113	284.773
2014-06-12 11:00:00	116.914	464.788	347.875
2014-06-12 12:00:00	307.836	527.015	219.179
2014-06-12 13:00:00	289.306	549.679	260.373
2014-06-12 14:00:00	310.81	621.845	311.035
2014-06-12 15:00:00	95.6517	706.707	611.056
2014-06-12 16:00:00	391.753	796.291	404.538
2014-06-12 17:00:00	577.988	917.29	339.302
2014-06-12 18:00:00	767.207	960.486	193.279
2014-06-12 19:00:00	908.102	973.366	65.2641
2014-06-12 20:00:00	937.286	938.818	1.53177
2014-06-12 21:00:00	933.225	936.201	2.97562
2014-06-12 22:00:00	736.649	738.562	1.91265
2014-06-12 23:00:00	563.2	563.047	-0.153117
2014-06-13	428.323	427.164	-1.15885
2014-06-13 01:00:00	372.979	372.555	-0.423683
2014-06-13 02:00:00	323.243	323.044	-0.198433
2014-06-13 03:00:00	290.541	290.646	0.1045
2014-06-13 04:00:00	270.194	270.146	-0.0477
2014-06-13 05:00:00	250.51	250.901	0.391733
2014-06-13 06:00:00	278.027	279.95	1.92258
2014-06-13 07:00:00	288.069	318.763	30.6936
2014-06-13 08:00:00	235.089	340.372	105.283
2014-06-13 09:00:00	124.522	361.892	237.371
2014-06-13 10:00:00	-11.1339	387.89	399.024
2014-06-13 11:00:00	-33.9222	449.314	483.237
2014-06-13 12:00:00	-92.9031	513.197	606.1
2014-06-13 13:00:00	-67.2305	573.342	640.572
2014-06-13 14:00:00	-19.4135	638.078	657.491
2014-06-13 15:00:00	104.477	722.518	618.041
2014-06-13 16:00:00	286.265	820.394	534.129
2014-06-13 17:00:00	519.28	913.335	394.055
2014-06-13 18:00:00	699.145	931.955	232.81
2014-06-13 19:00:00	774.721	864.55	89.8292
2014-06-13 20:00:00	836.614	841.737	5.12238
2014-06-13 21:00:00	816.26	820.093	3.83305
2014-06-13 22:00:00	769.107	776.214	7.10752
2014-06-13 23:00:00	615.946	619.398	3.45222
2014-06-14	502.579	504.46	1.88152
2014-06-14 01:00:00	437.598	439.623	2.025
2014-06-14 02:00:00	401.805	402.666	0.8608
2014-06-14 03:00:00	374.638	377.608	2.97008
2014-06-14 04:00:00	361.001	361.857	0.856767
2014-06-14 05:00:00	332.341	333.292	0.951017
2014-06-14 06:00:00	329.007	332.149	3.14233
2014-06-14 07:00:00	318.138	339.154	21.0164
2014-06-14 08:00:00	241.155	390.746	149.591
2014-06-14 09:00:00	247.762	435.52	187.758
2014-06-14 10:00:00	193.763	456.071	262.308
2014-06-14 11:00:00	68.7471	535.248	466.501
2014-06-14 12:00:00	93.7204	619.915	526.194
2014-06-14 13:00:00	8.45555	662.531	654.075
2014-06-14 14:00:00	406.787	713.158	306.371
2014-06-14 15:00:00	509.1	723.755	214.656
2014-06-14 16:00:00	577.819	724.593	146.774
2014-06-14 17:00:00	512.552	711.766	199.214
2014-06-14 18:00:00	563.397	728.488	165.091
2014-06-14 19:00:00	629.415	747.416	118
2014-06-14 20:00:00	755.37	765.855	10.4845
2014-06-14 21:00:00	760.783	765.234	4.45037
2014-06-14 22:00:00	687.878	694.824	6.9461
2014-06-14 23:00:00	602.362	605.491	3.12942
2014-06-15	507.531	510.7	3.16927
2014-06-15 01:00:00	415.482	417.348	1.86555
2014-06-15 02:00:00	382.802	385.441	2.63807
2014-06-15 03:00:00	367.627	368.731	1.1035
2014-06-15 04:00:00	346.949	349.963	3.01457
2014-06-15 05:00:00	340.007	341.107	1.09983
2014-06-15 06:00:00	314.12	320.454	6.33457
2014-06-15 07:00:00	289.771	343.606	53.8348
2014-06-15 08:00:00	251.476	395.974	144.498
2014-06-15 09:00:00	292.047	463.006	170.959
2014-06-15 10:00:00	99.9708	533.96	433.989
2014-06-15 11:00:00	34.5666	605.288	570.721
2014-06-15 12:00:00	124.342	675.248	550.906
2014-06-15 13:00:00	155.092	729.848	574.756
2014-06-15 14:00:00	151.478	781.255	629.777
2014-06-15 15:00:00	248.221	845.251	597.029
2014-06-15 16:00:00	383.603	917.715	534.112
2014-06-15 17:00:00	639.769	989.357	349.588
2014-06-15 18:00:00	774.609	1008.8	234.188
2014-06-15 19:00:00	926.746	1023.92	97.1747
2014-06-15 20:00:00	945.946	955.409	9.46283
2014-06-15 21:00:00	887.633	892.175	4.5421
2014-06-15 22:00:00	812.578	819.515	6.93703
2014-06-15 23:00:00	685.102	688.066	2.96452
2014-06-16	552.931	555.606	2.67532
2014-06-16 01:00:00	469.977	471.045	1.06793
2014-06-16 02:00:00	424.169	424.953	0.783933
2014-06-16 03:00:00	408.754	411.707	2.95238
2014-06-16 04:00:00	375.792	376.586	0.7941
2014-06-16 05:00:00	373.213	374.289	1.07685
2014-06-16 06:00:00	366.674	370.8	4.12555
2014-06-16 07:00:00	375.999	409.59	33.5907
2014-06-16 08:00:00	306.611	406.92	100.309
2014-06-16 09:00:00	201.741	426.477	224.736
2014-06-16 10:00:00	97.9848	479.18	381.195
2014-06-16 11:00:00	29.8798	534.632	504.752
2014-06-16 12:00:00	100.07	592.909	492.839
2014-06-16 13:00:00	37.8193	672.279	634.46
2014-06-16 14:00:00	74.8596	735.023	660.163
2014-06-16 15:00:00	173.877	800.131	626.253
2014-06-16 16:00:00	339.674	881.278	541.604
2014-06-16 17:00:00	629.687	989.947	360.26
2014-06-16 18:00:00	759.691	1021.63	261.941
2014-06-16 19:00:00	897.075	1003.52	106.449
2014-06-16 20:00:00	968.621	982.931	14.3097
2014-06-16 21:00:00	920.641	934.802	14.1608
2014-06-16 22:00:00	823.322	836.924	13.6016
2014-06-16 23:00:00	672.157	682.274	10.1167
2014-06-17	546.323	554.179	7.85572
2014-06-17 01:00:00	505.877	510.714	4.83732
2014-06-17 02:00:00	454.315	458.703	4.38758
2014-06-17 03:00:00	432.902	437.094	4.19255
2014-06-17 04:00:00	412.761	416.146	3.38568
2014-06-17 05:00:00	371.345	374.381	3.03588
2014-06-17 06:00:00	394.966	400.245	5.27843
2014-06-17 07:00:00	376.937	420.667	43.7299
2014-06-17 08:00:00	307.938	435.821	127.883
2014-06-17 09:00:00	186.859	419.768	232.91
2014-06-17 10:00:00	111.125	487.878	376.753
2014-06-17 11:00:00	68.4275	533.062	464.634
2014-06-17 12:00:00	66.3299	596.784	530.454
2014-06-17 13:00:00	111.189	674.32	563.131
2014-06-17 14:00:00	91.2931	723.094	631.801
2014-06-17 15:00:00	233.395	775.627	542.231
2014-06-17 16:00:00	432.299	893.635	461.336
2014-06-17 17:00:00	552.5	972.223	419.723
2014-06-17 18:00:00	831.55	1018.43	186.881
2014-06-17 19:00:00	889.393	963.76	74.3669
2014-06-17 20:00:00	916.328	935.904	19.5754
2014-06-17 21:00:00	855.214	865.01	9.79568
2014-06-17 22:00:00	763.917	776.111	12.1944
2014-06-17 23:00:00	657.38	666.169	8.78922
2014-06-18	566.979	573.347	6.36833
2014-06-18 01:00:00	496.312	499.136	2.82352
2014-06-18 02:00:00	429.065	435.003	5.93712
2014-06-18 03:00:00	400.573	403.648	3.07542
2014-06-18 04:00:00	396.207	401.578	5.37098
2014-06-18 05:00:00	369.25	373.02	3.76983
2014-06-18 06:00:00	397.876	400.635	2.75917
2014-06-18 07:00:00	407.606	425.963	18.3563
2014-06-18 08:00:00	352.419	411.912	59.4926
2014-06-18 09:00:00	252.767	388.14	135.373
2014-06-18 10:00:00	182.789	415.687	232.898
2014-06-18 11:00:00	57.0177	472.3	415.282
2014-06-18 12:00:00	48.7576	534.51	485.752
2014-06-18 13:00:00	34.1372	612.187	578.05
2014-06-18 14:00:00	25.5402	677.783	652.243
2014-06-18 15:00:00	263.359	740.02	476.661
2014-06-18 16:00:00	315.259	838.665	523.406
2014-06-18 17:00:00	555.936	933.62	377.684
2014-06-18 18:00:00	748.309	976.984	228.674
2014-06-18 19:00:00	838.763	911.651	72.8874
2014-06-18 20:00:00	902.999	916.346	13.3471
2014-06-18 21:00:00	855.509	864.06	8.55093
2014-06-18 22:00:00	780.604	793.074	12.4695
2014-06-18 23:00:00	646.397	652.231	5.83422
2014-06-19	527.137	532.393	5.25583
2014-06-19 01:00:00	476.137	478.888	2.75078
2014-06-19 02:00:00	415.859	419.871	4.01103
2014-06-19 03:00:00	389.895	391.176	1.28105
2014-06-19 04:00:00	359.479	363.427	3.9479
2014-06-19 05:00:00	359.52	360.586	1.0659
2014-06-19 06:00:00	374.971	379.539	4.56815
2014-06-19 07:00:00	345.795	393.802	48.0065
2014-06-19 08:00:00	274.451	390.959	116.508
2014-06-19 09:00:00	210.215	391.268	181.053
2014-06-19 10:00:00	128.706	437.164	308.458
2014-06-19 11:00:00	-8.69163	529.577	538.268
2014-06-19 12:00:00	106.968	604.551	497.583
2014-06-19 13:00:00	131.85	647.38	515.531
2014-06-19 14:00:00	134.417	695.237	560.82
2014-06-19 15:00:00	212.706	772.465	559.759
2014-06-19 16:00:00	463.436	863.414	399.978
2014-06-19 17:00:00	655.02	919.938	264.918
2014-06-19 18:00:00	785.62	924.17	138.551
2014-06-19 19:00:00	832.408	887.975	55.5671
2014-06-19 20:00:00	878.237	890.973	12.7357
2014-06-19 21:00:00	871.379	878.65	7.27122
2014-06-19 22:00:00	774.758	786.363	11.6045
2014-06-19 23:00:00	629.842	636.515	6.67343
2014-06-20	518.88	522.87	3.98977
2014-06-20 01:00:00	433.976	437.577	3.60095
2014-06-20 02:00:00	398.09	401.454	3.36378
2014-06-20 03:00:00	379.553	383.276	3.72352
2014-06-20 04:00:00	344.153	346.587	2.43385
2014-06-20 05:00:00	314.69	316.538	1.84817
2014-06-20 06:00:00	339.905	344	4.09435
2014-06-20 07:00:00	331.35	386.788	55.4379
2014-06-20 08:00:00	231.809	384.373	152.564
2014-06-20 09:00:00	205.986	393.951	187.965
2014-06-20 10:00:00	160.028	441.856	281.828
2014-06-20 11:00:00	55.1353	507.463	452.328
2014-06-20 12:00:00	164.852	559.141	394.288
2014-06-20 13:00:00	35.6847	628.402	592.717
2014-06-20 14:00:00	102.877	692.08	589.203
2014-06-20 15:00:00	180.521	803.68	623.159
2014-06-20 16:00:00	391.084	869.544	478.461
2014-06-20 17:00:00	517.233	961.261	444.028
2014-06-20 18:00:00	714.992	948.522	233.53
2014-06-20 19:00:00	805.085	895.372	90.2868
2014-06-20 20:00:00	853.343	868.096	14.7536
2014-06-20 21:00:00	826.782	832.858	6.07578
2014-06-20 22:00:00	747.175	756.119	8.94338
2014-06-20 23:00:00	625.315	632.765	7.45067
2014-06-21	530.492	534.038	3.54593
2014-06-21 01:00:00	454.544	458.606	4.0619
2014-06-21 02:00:00	411.831	413.704	1.87327
2014-06-21 03:00:00	361.858	365.729	3.87135
2014-06-21 04:00:00	359.725	361.542	1.81687
2014-06-21 05:00:00	317.044	318.291	1.24717
2014-06-21 06:00:00	325.601	329.744	4.14325
2014-06-21 07:00:00	294.8	343.961	49.1609
2014-06-21 08:00:00	314.527	387.555	73.0286
2014-06-21 09:00:00	255.415	419.916	164.5
2014-06-21 10:00:00	159.555	494.427	334.871
2014-06-21 11:00:00	140.615	570.325	429.709
2014-06-21 12:00:00	84.5845	658.124	573.539
2014-06-21 13:00:00	181.251	736.195	554.944
2014-06-21 14:00:00	215.905	783.991	568.085
2014-06-21 15:00:00	328.363	866.24	537.877
2014-06-21 16:00:00	461.143	915.151	454.008
2014-06-21 17:00:00	648.557	919.07	270.513
2014-06-21 18:00:00	732.041	908.338	176.296
2014-06-21 19:00:00	794.454	889.786	95.3317
2014-06-21 20:00:00	857.462	865.692	8.23055
2014-06-21 21:00:00	827.142	833.995	6.85292
2014-06-21 22:00:00	790.998	796.212	5.2147
2014-06-21 23:00:00	665.423	668.736	3.31232
2014-06-22	562.215	565.121	2.90632
2014-06-22 01:00:00	481.63	483.972	2.34215
2014-06-22 02:00:00	439.291	441.404	2.11282
2014-06-22 03:00:00	401.992	404.764	2.77193
2014-06-22 04:00:00	377.55	378.539	0.9892
2014-06-22 05:00:00	377.546	378.284	0.738233
2014-06-22 06:00:00	364.088	367.036	2.94797
2014-06-22 07:00:00	360.783	377.423	16.6398
2014-06-22 08:00:00	349.18	426.416	77.2359
2014-06-22 09:00:00	326.904	499.92	173.015
2014-06-22 10:00:00	196.153	539.61	343.457
2014-06-22 11:00:00	223.734	588.062	364.328
2014-06-22 12:00:00	286.037	655.753	369.715
2014-06-22 13:00:00	416.287	686.283	269.996
2014-06-22 14:00:00	299.792	723.113	423.321
2014-06-22 15:00:00	276.442	816.964	540.522
2014-06-22 16:00:00	444.122	852.234	408.113
2014-06-22 17:00:00	645.405	879.872	234.467
2014-06-22 18:00:00	722.948	870.17	147.222
2014-06-22 19:00:00	798.44	859.234	60.7934
2014-06-22 20:00:00	843.764	856.019	12.2552
2014-06-22 21:00:00	821.19	827.637	6.44712
2014-06-22 22:00:00	761.537	771.061	9.52425
2014-06-22 23:00:00	607.892	612.927	5.03502
2014-06-23	503.566	507.157	3.59067
2014-06-23 01:00:00	423.375	426.158	2.78287
2014-06-23 02:00:00	403.024	407.744	4.72072
2014-06-23 03:00:00	375.974	378.425	2.4507
2014-06-23 04:00:00	356.896	359.973	3.07755
2014-06-23 05:00:00	361.428	365.33	3.90213
2014-06-23 06:00:00	376.458	378.504	2.04567
2014-06-23 07:00:00	382.153	428.217	46.064
2014-06-23 08:00:00	328.169	421.458	93.2891
2014-06-23 09:00:00	181.242	421.448	240.206
2014-06-23 10:00:00	234.811	464.453	229.641
2014-06-23 11:00:00	402.389	478.743	76.3541
2014-06-23 12:00:00	348.262	470.849	122.587
2014-06-23 13:00:00	75.4136	463.232	387.818
2014-06-23 14:00:00	38.7259	484.461	445.735
2014-06-23 15:00:00	10.1458	568.027	557.881
2014-06-23 16:00:00	201.743	685.404	483.661
2014-06-23 17:00:00	475.155	845.407	370.252
2014-06-23 18:00:00	675.22	926.171	250.951
2014-06-23 19:00:00	890.494	927.545	37.0509
2014-06-23 20:00:00	878.679	885.277	6.59787
2014-06-23 21:00:00	839.873	849.275	9.40202
2014-06-23 22:00:00	782.847	793.308	10.4609
2014-06-23 23:00:00	639.235	645.774	6.53933
2014-06-24	515.002	520.262	5.2596
2014-06-24 01:00:00	439.145	443.427	4.28187
2014-06-24 02:00:00	403.752	407.187	3.4355
2014-06-24 03:00:00	365.437	368.05	2.61307
2014-06-24 04:00:00	350.082	353.708	3.62633
2014-06-24 05:00:00	338.619	340.558	1.93832
2014-06-24 06:00:00	349.883	352.313	2.43028
2014-06-24 07:00:00	351.67	387.966	36.2963
2014-06-24 08:00:00	256.221	395.077	138.856
2014-06-24 09:00:00	156.883	407.583	250.7
2014-06-24 10:00:00	109.546	440.416	330.87
2014-06-24 11:00:00	36.0223	516.66	480.638
2014-06-24 12:00:00	111.106	608.865	497.759
2014-06-24 13:00:00	135.538	651.665	516.127
2014-06-24 14:00:00	252.939	732.637	479.697
2014-06-24 15:00:00	436.092	753.745	317.654
2014-06-24 16:00:00	436.891	720.054	283.162
2014-06-24 17:00:00	367.25	804.662	437.412
2014-06-24 18:00:00	623.702	890.183	266.48
2014-06-24 19:00:00	750.563	883.893	133.33
2014-06-24 20:00:00	859.787	879.134	19.3468
2014-06-24 21:00:00	786.106	796.436	10.3292
2014-06-24 22:00:00	701.684	709.652	7.96825
2014-06-24 23:00:00	600.077	603.467	3.39035
2014-06-25	500.583	502.517	1.93405
2014-06-25 01:00:00	421.732	425.318	3.58618
2014-06-25 02:00:00	392.639	394.853	2.21432
2014-06-25 03:00:00	374.595	378.47	3.87497
2014-06-25 04:00:00	364.67	366.005	1.33498
2014-06-25 05:00:00	355.424	358.741	3.31698
2014-06-25 06:00:00	368.933	371.084	2.151
2014-06-25 07:00:00	347.425	398.217	50.7927
2014-06-25 08:00:00	329.105	417.284	88.1796
2014-06-25 09:00:00	332.385	360.092	27.7064
2014-06-25 10:00:00	192.948	369.551	176.603
2014-06-25 11:00:00	55.2503	403.695	348.444
2014-06-25 12:00:00	19.9696	447.185	427.216
2014-06-25 13:00:00	-82.3302	489.869	572.199
2014-06-25 14:00:00	-18.8243	545.335	564.159
2014-06-25 15:00:00	108.908	648.211	539.303
2014-06-25 16:00:00	243.744	750.381	506.637
2014-06-25 17:00:00	354.362	807.809	453.447
2014-06-25 18:00:00	610.693	856.199	245.506
2014-06-25 19:00:00	785.284	826.224	40.9401
2014-06-25 20:00:00	809.319	820.212	10.8935
2014-06-25 21:00:00	766.684	775.845	9.16103
2014-06-25 22:00:00	667.081	674.845	7.76328
2014-06-25 23:00:00	535.598	540.396	4.7977
2014-06-26	431.863	433.81	1.94687
2014-06-26 01:00:00	370.206	372.349	2.14342
2014-06-26 02:00:00	323.335	324.37	1.0349
2014-06-26 03:00:00	306.457	308.514	2.05702
2014-06-26 04:00:00	295.039	297.178	2.13922
2014-06-26 05:00:00	282.154	283.34	1.18592
2014-06-26 06:00:00	308.267	309.26	0.993467
2014-06-26 07:00:00	321.839	345.789	23.9506
2014-06-26 08:00:00	296.67	367.199	70.5287
2014-06-26 09:00:00	231.355	347.387	116.032
2014-06-26 10:00:00	202.313	342.33	140.017
2014-06-26 11:00:00	-24.2742	387.013	411.288
2014-06-26 12:00:00	53.2638	447.866	394.602
2014-06-26 13:00:00	14.8148	479.217	464.403
2014-06-26 14:00:00	179.485	519.7	340.215
2014-06-26 15:00:00	4.12212	583.279	579.157
2014-06-26 16:00:00	182.483	673.907	491.424
2014-06-26 17:00:00	388.221	808.179	419.957
2014-06-26 18:00:00	627.02	860.935	233.915
2014-06-26 19:00:00	741.078	793.508	52.4303
2014-06-26 20:00:00	790.053	799.465	9.4113
2014-06-26 21:00:00	778.223	785.351	7.1277
2014-06-26 22:00:00	745.714	753.862	8.14797
2014-06-26 23:00:00	611.806	617.201	5.39477
2014-06-27	475.215	477.568	2.35258
2014-06-27 01:00:00	415.104	423.025	7.921
2014-06-27 02:00:00	376.296	380.996	4.69962
2014-06-27 03:00:00	347.477	352.224	4.74732
2014-06-27 04:00:00	337.291	338.316	1.02492
2014-06-27 05:00:00	328.02	329.174	1.15418
2014-06-27 06:00:00	335.833	338.537	2.70457
2014-06-27 07:00:00	358.348	379.18	20.8321
2014-06-27 08:00:00	305.296	392.975	87.6788
2014-06-27 09:00:00	247.873	381.437	133.565
2014-06-27 10:00:00	134.554	421.521	286.967
2014-06-27 11:00:00	119.539	441.368	321.829
2014-06-27 12:00:00	121.507	540.165	418.658
2014-06-27 13:00:00	150.52	586.258	435.738
2014-06-27 14:00:00	30.3774	622.172	591.795
2014-06-27 15:00:00	101.634	698.933	597.299
2014-06-27 16:00:00	439.569	774.146	334.576
2014-06-27 17:00:00	468.553	875.632	407.079
2014-06-27 18:00:00	688.121	878.67	190.55
2014-06-27 19:00:00	773.305	831.898	58.5935
2014-06-27 20:00:00	774.118	781.703	7.58518
2014-06-27 21:00:00	812.258	822.557	10.2994
2014-06-27 22:00:00	756.82	766.854	10.034
2014-06-27 23:00:00	611.918	622.453	10.5352
2014-06-28	533.785	539.592	5.80723
2014-06-28 01:00:00	451.231	457.834	6.60285
2014-06-28 02:00:00	439.333	446.095	6.76237
2014-06-28 03:00:00	409.664	415.351	5.68687
2014-06-28 04:00:00	389.891	395.14	5.24885
2014-06-28 05:00:00	381.777	386.377	4.59942
2014-06-28 06:00:00	373.889	379.986	6.0968
2014-06-28 07:00:00	386.552	410.171	23.6192
2014-06-28 08:00:00	321.371	440.46	119.09
2014-06-28 09:00:00	311.33	506.436	195.106
2014-06-28 10:00:00	179.185	546.453	367.268
2014-06-28 11:00:00	350.997	595.753	244.757
2014-06-28 12:00:00	362.046	640.04	277.994
2014-06-28 13:00:00	253.277	689.663	436.386
2014-06-28 14:00:00	150.957	750.18	599.223
2014-06-28 15:00:00	288.289	857.507	569.218
2014-06-28 16:00:00	440.709	933.129	492.42
2014-06-28 17:00:00	654.186	947.39	293.204
2014-06-28 18:00:00	741.869	915.579	173.71
2014-06-28 19:00:00	813.722	878.729	65.0068
2014-06-28 20:00:00	853.118	866.579	13.4618
2014-06-28 21:00:00	856.566	864.73	8.16455
2014-06-28 22:00:00	787.355	791.801	4.44573
2014-06-28 23:00:00	681.283	686.927	5.64437
2014-06-29	589.518	595.03	5.51148
2014-06-29 01:00:00	527.32	532.772	5.45125
2014-06-29 02:00:00	488.327	492.192	3.86517
2014-06-29 03:00:00	462.759	466.026	3.267
2014-06-29 04:00:00	430.925	434.723	3.79835
2014-06-29 05:00:00	417.246	424.023	6.77747
2014-06-29 06:00:00	378.217	387.262	9.04457
2014-06-29 07:00:00	325.242	376.371	51.1297
2014-06-29 08:00:00	342.123	449.032	106.909
2014-06-29 09:00:00	309.598	511.023	201.426
2014-06-29 10:00:00	255.272	594.715	339.443
2014-06-29 11:00:00	198.664	659.967	461.303
2014-06-29 12:00:00	294.076	748.796	454.72
2014-06-29 13:00:00	248.551	848.34	599.789
2014-06-29 14:00:00	397.902	915.439	517.537
2014-06-29 15:00:00	397.956	966.617	568.66
2014-06-29 16:00:00	501.714	1048.48	546.77
2014-06-29 17:00:00	660.995	1086.76	425.76
2014-06-29 18:00:00	819.569	1077.06	257.489
2014-06-29 19:00:00	918.552	1027.26	108.704
2014-06-29 20:00:00	975.114	999.61	24.4955
2014-06-29 21:00:00	936.988	950.799	13.8116
2014-06-29 22:00:00	853.723	859.443	5.7203
2014-06-29 23:00:00	688.478	693.3	4.8229
2014-06-30	566.847	571.534	4.68762
2014-06-30 01:00:00	483.666	489.736	6.07065
2014-06-30 02:00:00	446.263	452.355	6.09225
2014-06-30 03:00:00	412.713	415.492	2.77947
2014-06-30 04:00:00	391.713	398.985	7.27193
2014-06-30 05:00:00	382.548	385.515	2.96647
2014-06-30 06:00:00	389.917	397.117	7.19978
2014-06-30 07:00:00	371.784	419.042	47.2578
2014-06-30 08:00:00	299.201	428.381	129.18
2014-06-30 09:00:00	186.2	440.077	253.876
2014-06-30 10:00:00	132.676	502.176	369.5
2014-06-30 11:00:00	46.6117	583.613	537.001
2014-06-30 12:00:00	23.9927	654.095	630.102
2014-06-30 13:00:00	80.2249	754.302	674.077
2014-06-30 14:00:00	128.038	807.663	679.625
2014-06-30 15:00:00	263.756	895.509	631.753
2014-06-30 16:00:00	367.927	904.212	536.286
2014-06-30 17:00:00	577.447	983.225	405.779
2014-06-30 18:00:00	814.663	1062.59	247.931
2014-06-30 19:00:00	950.298	1050.3	100.007
2014-06-30 20:00:00	950.173	969.03	18.8573
2014-06-30 21:00:00	925.52	937.548	12.0277
2014-06-30 22:00:00	806.101	812.104	6.00358
2014-06-30 23:00:00	704.581	707.732	3.1511
2014-07-01	555.809	560.929	5.1207
2014-07-01 01:00:00	485.65	490.261	4.61098
2014-07-01 02:00:00	423.001	427.668	4.66692
2014-07-01 03:00:00	402.034	406.391	4.35685
2014-07-01 04:00:00	382.414	386.585	4.17108
2014-07-01 05:00:00	364.757	369.126	4.36818
2014-07-01 06:00:00	371.184	375.932	4.74748
2014-07-01 07:00:00	377.004	417.175	40.1712
2014-07-01 08:00:00	291.944	412.478	120.534
2014-07-01 09:00:00	189.452	422.871	233.419
2014-07-01 10:00:00	105.706	484.413	378.707
2014-07-01 11:00:00	23.2492	543.803	520.554
2014-07-01 12:00:00	39.4534	644.124	604.671
2014-07-01 13:00:00	47.5939	704.58	656.986
2014-07-01 14:00:00	158.587	799.133	640.546
2014-07-01 15:00:00	263.888	895.887	631.999
2014-07-01 16:00:00	492.545	976.731	484.186
2014-07-01 17:00:00	653.063	1057.4	404.333
2014-07-01 18:00:00	872.965	1086.99	214.027
2014-07-01 19:00:00	964.613	1080.05	115.441
2014-07-01 20:00:00	990.975	1011.59	20.6195
2014-07-01 21:00:00	926.093	938.517	12.4232
2014-07-01 22:00:00	827.914	841.32	13.406
2014-07-01 23:00:00	691.753	702.957	11.2044
2014-07-02	586.439	594.35	7.91135
2014-07-02 01:00:00	472.079	481.267	9.18813
2014-07-02 02:00:00	409.762	415.502	5.73963
2014-07-02 03:00:00	398.239	403.934	5.69568
2014-07-02 04:00:00	368.526	372.939	4.41352
2014-07-02 05:00:00	358.105	363.142	5.03627
2014-07-02 06:00:00	364.565	372.811	8.24632
2014-07-02 07:00:00	361.267	400.253	38.986
2014-07-02 08:00:00	284.185	410.755	126.57
2014-07-02 09:00:00	188.288	427.314	239.026
2014-07-02 10:00:00	99.8446	494.46	394.616
2014-07-02 11:00:00	41.9674	570.263	528.296
2014-07-02 12:00:00	42.8777	646.808	603.93
2014-07-02 13:00:00	72.4795	726.583	654.103
2014-07-02 14:00:00	167.254	822.414	655.16
2014-07-02 15:00:00	359.985	932.291	572.306
2014-07-02 16:00:00	434.104	1008.15	574.048
2014-07-02 17:00:00	660.667	1079.95	419.283
2014-07-02 18:00:00	814.453	1083.83	269.378
2014-07-02 19:00:00	951.899	1068.04	116.14
2014-07-02 20:00:00	985.572	1010.02	24.4478
2014-07-02 21:00:00	960.421	977.601	17.1807
2014-07-02 22:00:00	872.443	882.959	10.5168
2014-07-02 23:00:00	728.689	738.506	9.81692
2014-07-03	598.702	611.19	12.488
2014-07-03 01:00:00	512.026	521.897	9.87093
2014-07-03 02:00:00	450.526	456.751	6.22493
2014-07-03 03:00:00	416.226	421.217	4.99158
2014-07-03 04:00:00	383.86	388.935	5.07552
2014-07-03 05:00:00	357.519	365.34	7.82068
2014-07-03 06:00:00	359.976	365.941	5.96567
2014-07-03 07:00:00	358.049	391.175	33.1258
2014-07-03 08:00:00	324.548	416.52	91.9714
2014-07-03 09:00:00	206.331	439.627	233.296
2014-07-03 10:00:00	121.055	503.923	382.868
2014-07-03 11:00:00	55.2283	589.028	533.799
2014-07-03 12:00:00	77.939	687.031	609.092
2014-07-03 13:00:00	150.438	754.27	603.833
2014-07-03 14:00:00	200.717	835.05	634.333
2014-07-03 15:00:00	450.373	943.674	493.3
2014-07-03 16:00:00	469.083	1001.93	532.844
2014-07-03 17:00:00	736.167	1045.86	309.695
2014-07-03 18:00:00	956.252	1029.48	73.2232
2014-07-03 19:00:00	869.289	883.821	14.5322
2014-07-03 20:00:00	766.667	781.004	14.3375
2014-07-03 21:00:00	748.077	758.379	10.3022
2014-07-03 22:00:00	660.488	668.08	7.59215
2014-07-03 23:00:00	549.503	554.829	5.32615
2014-07-04	447.984	460.71	12.7267
2014-07-04 01:00:00	373.348	383.087	9.73935
2014-07-04 02:00:00	346.515	360.793	14.2778
2014-07-04 03:00:00	311.453	323.343	11.8903
2014-07-04 04:00:00	303.765	310.673	6.90772
2014-07-04 05:00:00	280.25	287.685	7.43557
2014-07-04 06:00:00	296.994	301.639	4.64505
2014-07-04 07:00:00	296.117	322.745	26.6283
2014-07-04 08:00:00	274.224	365.094	90.8697
2014-07-04 09:00:00	159.928	368.994	209.066
2014-07-04 10:00:00	104.245	457.783	353.538
2014-07-04 11:00:00	79.31	536.524	457.214
2014-07-04 12:00:00	100.285	609.405	509.12
2014-07-04 13:00:00	141.073	671.998	530.925
2014-07-04 14:00:00	143.451	707.983	564.532
2014-07-04 15:00:00	184.591	807.018	622.426
2014-07-04 16:00:00	323.345	877.227	553.881
2014-07-04 17:00:00	477.427	911.266	433.838
2014-07-04 18:00:00	586.292	878.151	291.859
2014-07-04 19:00:00	685.382	807.21	121.828
2014-07-04 20:00:00	705.239	719.403	14.1638
2014-07-04 21:00:00	715.754	721.664	5.90975
2014-07-04 22:00:00	644.106	650.326	6.21995
2014-07-04 23:00:00	569.749	576.468	6.7193
2014-07-05	472.688	478.658	5.97025
2014-07-05 01:00:00	403.886	409.466	5.57973
2014-07-05 02:00:00	336.346	340.319	3.97347
2014-07-05 03:00:00	300.273	302.911	2.6386
2014-07-05 04:00:00	282.104	285.904	3.7999
2014-07-05 05:00:00	271.66	275.22	3.56005
2014-07-05 06:00:00	276.642	279.894	3.25125
2014-07-05 07:00:00	263.134	295.887	32.7532
2014-07-05 08:00:00	245.453	351.545	106.092
2014-07-05 09:00:00	199.492	437.987	238.495
2014-07-05 10:00:00	122.211	511.905	389.694
2014-07-05 11:00:00	86.1841	597.242	511.058
2014-07-05 12:00:00	62.5809	658.689	596.108
2014-07-05 13:00:00	188.975	742.379	553.404
2014-07-05 14:00:00	137.276	813.314	676.038
2014-07-05 15:00:00	235.313	857.072	621.758
2014-07-05 16:00:00	512.838	901.085	388.247
2014-07-05 17:00:00	489.823	924.078	434.255
2014-07-05 18:00:00	663.492	881.528	218.036
2014-07-05 19:00:00	694.005	813.148	119.143
2014-07-05 20:00:00	756.824	775.288	18.4647
2014-07-05 21:00:00	765.97	770.323	4.3534
2014-07-05 22:00:00	685.941	694.842	8.9007
2014-07-05 23:00:00	587.329	591.834	4.50545
2014-07-06	481.108	492.113	11.0046
2014-07-06 01:00:00	419.202	425.365	6.16302
2014-07-06 02:00:00	370.58	376.904	6.32452
2014-07-06 03:00:00	348.166	352.483	4.31753
2014-07-06 04:00:00	330.326	335.516	5.18995
2014-07-06 05:00:00	310.439	313.283	2.84397
2014-07-06 06:00:00	319.428	322.374	2.94605
2014-07-06 07:00:00	312.914	334.588	21.6744
2014-07-06 08:00:00	289.357	374.603	85.2457
2014-07-06 09:00:00	172.353	423.784	251.431
2014-07-06 10:00:00	155.863	504.297	348.434
2014-07-06 11:00:00	-4.19178	554.748	558.94
2014-07-06 12:00:00	63.0196	643.228	580.208
2014-07-06 13:00:00	122.278	728.706	606.428
2014-07-06 14:00:00	219.12	839.255	620.135
2014-07-06 15:00:00	457.851	913.891	456.039
2014-07-06 16:00:00	432.583	964.639	532.056
2014-07-06 17:00:00	676.31	1090.52	414.206
2014-07-06 18:00:00	824.927	1054.26	229.336
2014-07-06 19:00:00	975.082	1068.83	93.7506
2014-07-06 20:00:00	1002.58	1014.86	12.2763
2014-07-06 21:00:00	945.079	959.834	14.7542
2014-07-06 22:00:00	849.158	861.347	12.1886
2014-07-06 23:00:00	696.205	707.3	11.0945
2014-07-07	590.969	597.773	6.8048
2014-07-07 01:00:00	480.406	488.97	8.56428
2014-07-07 02:00:00	429.048	434.496	5.44827
2014-07-07 03:00:00	403.807	408.474	4.66653
2014-07-07 04:00:00	351.857	358.56	6.70303
2014-07-07 05:00:00	339.075	342.468	3.3929
2014-07-07 06:00:00	352.558	359.043	6.48423
2014-07-07 07:00:00	343.692	381.837	38.145
2014-07-07 08:00:00	276.704	382.62	105.916
2014-07-07 09:00:00	168.426	409.516	241.09
2014-07-07 10:00:00	82.7639	482.953	400.189
2014-07-07 11:00:00	-0.39885	543.828	544.227
2014-07-07 12:00:00	-8.36048	624.283	632.644
2014-07-07 13:00:00	15.4005	689.789	674.388
2014-07-07 14:00:00	105.113	786.31	681.197
2014-07-07 15:00:00	245.156	882.844	637.688
2014-07-07 16:00:00	417.193	966.313	549.12
2014-07-07 17:00:00	624.031	1043.19	419.159
2014-07-07 18:00:00	844.689	1103.99	259.298
2014-07-07 19:00:00	971.307	1080.22	108.916
2014-07-07 20:00:00	1035.91	1053.81	17.9063
2014-07-07 21:00:00	1011.4	1024.34	12.9412
2014-07-07 22:00:00	893.637	902.851	9.21357
2014-07-07 23:00:00	735.228	743.795	8.5668
2014-07-08	628.096	633.816	5.71927
2014-07-08 01:00:00	524.288	529.358	5.0699
2014-07-08 02:00:00	446.108	450.773	4.66458
2014-07-08 03:00:00	421.884	426.629	4.74415
2014-07-08 04:00:00	380.316	382.523	2.20742
2014-07-08 05:00:00	381.76	385.802	4.04222
2014-07-08 06:00:00	385.607	389.937	4.32953
2014-07-08 07:00:00	380.946	411.206	30.2604
2014-07-08 08:00:00	324.899	432.612	107.714
2014-07-08 09:00:00	203.156	436.954	233.799
2014-07-08 10:00:00	117.292	517.102	399.81
2014-07-08 11:00:00	30.6384	569.029	538.391
2014-07-08 12:00:00	22.6695	647.742	625.073
2014-07-08 13:00:00	25.1168	700.451	675.334
2014-07-08 14:00:00	100.934	779.455	678.521
2014-07-08 15:00:00	226.962	858.139	631.177
2014-07-08 16:00:00	441.87	969.488	527.619
2014-07-08 17:00:00	651.631	1082.6	430.971
2014-07-08 18:00:00	862.572	1121.07	258.499
2014-07-08 19:00:00	971.829	1087.4	115.569
2014-07-08 20:00:00	1018.84	1038.25	19.406
2014-07-08 21:00:00	984.131	997.297	13.1657
2014-07-08 22:00:00	883.887	894.81	10.9226
2014-07-08 23:00:00	762.958	771.804	8.84538
2014-07-09	601.336	608.885	7.54838
2014-07-09 01:00:00	507.145	512.525	5.38003
2014-07-09 02:00:00	444.899	450.328	5.42872
2014-07-09 03:00:00	405.895	411.315	5.4202
2014-07-09 04:00:00	373.822	377.393	3.57102
2014-07-09 05:00:00	347.783	352.282	4.49847
2014-07-09 06:00:00	383.98	388.044	4.06438
2014-07-09 07:00:00	365.125	397.526	32.4004
2014-07-09 08:00:00	293.653	397.796	104.143
2014-07-09 09:00:00	181.321	418.77	237.448
2014-07-09 10:00:00	98.1137	482.6	384.486
2014-07-09 11:00:00	12.57	536.769	524.199
2014-07-09 12:00:00	27.0088	639.684	612.675
2014-07-09 13:00:00	29.5532	694.891	665.338
2014-07-09 14:00:00	115.947	787.219	671.273
2014-07-09 15:00:00	253.869	874.857	620.988
2014-07-09 16:00:00	414.555	958.707	544.152
2014-07-09 17:00:00	644.11	1068.9	424.786
2014-07-09 18:00:00	832.26	1095.48	263.221
2014-07-09 19:00:00	947.687	1065.14	117.456
2014-07-09 20:00:00	1031.82	1049.99	18.1709
2014-07-09 21:00:00	958.236	970.613	12.3766
2014-07-09 22:00:00	854.809	867.967	13.1572
2014-07-09 23:00:00	724.798	734.246	9.4478
2014-07-10	616.062	621.732	5.66942
2014-07-10 01:00:00	515.491	521.822	6.33113
2014-07-10 02:00:00	436.881	439.864	2.98297
2014-07-10 03:00:00	406.893	413.085	6.19198
2014-07-10 04:00:00	379.563	382.746	3.18285
2014-07-10 05:00:00	351.157	355.163	4.00563
2014-07-10 06:00:00	354.668	359.419	4.75143
2014-07-10 07:00:00	343.878	379.575	35.697
2014-07-10 08:00:00	275.948	390.917	114.969
2014-07-10 09:00:00	176.251	416.287	240.036
2014-07-10 10:00:00	64.1471	476.134	411.987
2014-07-10 11:00:00	-3.4005	530.96	534.36
2014-07-10 12:00:00	59.2894	628.979	569.69
2014-07-10 13:00:00	53.8713	712.81	658.939
2014-07-10 14:00:00	168.974	779.392	610.418
2014-07-10 15:00:00	237.632	868.636	631.004
2014-07-10 16:00:00	335.562	893.808	558.246
2014-07-10 17:00:00	621.738	995.643	373.905
2014-07-10 18:00:00	779.134	1049.96	270.831
2014-07-10 19:00:00	867.229	990.923	123.694
2014-07-10 20:00:00	930.311	951.853	21.5415
2014-07-10 21:00:00	891.686	901.623	9.93707
2014-07-10 22:00:00	794.341	806.061	11.7206
2014-07-10 23:00:00	661.729	667.356	5.62728
2014-07-11	544.783	549.407	4.6232
2014-07-11 01:00:00	446.104	448.655	2.55117
2014-07-11 02:00:00	397.654	402.835	5.18075
2014-07-11 03:00:00	362.16	364.595	2.43478
2014-07-11 04:00:00	347.185	349.579	2.39397
2014-07-11 05:00:00	323.706	325.889	2.18333
2014-07-11 06:00:00	347.204	350.506	3.30173
2014-07-11 07:00:00	326.679	357.812	31.1335
2014-07-11 08:00:00	303.058	374.135	71.0774
2014-07-11 09:00:00	202.73	369.174	166.443
2014-07-11 10:00:00	141.717	403.889	262.171
2014-07-11 11:00:00	173.024	462.496	289.472
2014-07-11 12:00:00	165.486	533.851	368.365
2014-07-11 13:00:00	190.657	579.297	388.64
2014-07-11 14:00:00	111.958	659.521	547.564
2014-07-11 15:00:00	150.665	726.603	575.939
2014-07-11 16:00:00	280.137	821.298	541.161
2014-07-11 17:00:00	539.995	951.302	411.307
2014-07-11 18:00:00	684.232	926.809	242.578
2014-07-11 19:00:00	767.7	864.578	96.8777
2014-07-11 20:00:00	843.98	854.656	10.676
2014-07-11 21:00:00	813.976	821.691	7.71482
2014-07-11 22:00:00	741.416	748.807	7.39082
2014-07-11 23:00:00	638.533	644.268	5.73462
2014-07-12	521.667	525.827	4.15982
2014-07-12 01:00:00	442.687	446.228	3.5412
2014-07-12 02:00:00	390.101	393.259	3.15855
2014-07-12 03:00:00	352.003	354.661	2.658
2014-07-12 04:00:00	336.359	338.069	1.71003
2014-07-12 05:00:00	318.945	321.457	2.51253
2014-07-12 06:00:00	325.785	328.736	2.9508
2014-07-12 07:00:00	298.694	333.967	35.2727
2014-07-12 08:00:00	267.605	386.729	119.124
2014-07-12 09:00:00	235.272	475.51	240.238
2014-07-12 10:00:00	169.459	559.24	389.781
2014-07-12 11:00:00	108.688	638.207	529.52
2014-07-12 12:00:00	121.101	734.809	613.709
2014-07-12 13:00:00	153.42	811.898	658.478
2014-07-12 14:00:00	245.632	913.215	667.584
2014-07-12 15:00:00	372.586	1006.32	633.734
2014-07-12 16:00:00	522.388	1071.19	548.799
2014-07-12 17:00:00	638.059	1060.97	422.915
2014-07-12 18:00:00	830.751	1075.55	244.796
2014-07-12 19:00:00	917.429	1026.79	109.358
2014-07-12 20:00:00	955.901	973.488	17.5879
2014-07-12 21:00:00	939.256	949.517	10.261
2014-07-12 22:00:00	868.67	878.736	10.066
2014-07-12 23:00:00	746.177	752.344	6.16693
2014-07-13	652.402	659.119	6.71647
2014-07-13 01:00:00	565.796	570.685	4.88955
2014-07-13 02:00:00	518.403	522.228	3.8248
2014-07-13 03:00:00	442.947	446.716	3.76923
2014-07-13 04:00:00	421.733	424.886	3.15245
2014-07-13 05:00:00	393.874	397.123	3.24865
2014-07-13 06:00:00	390.399	393.322	2.9232
2014-07-13 07:00:00	358.632	384.084	25.4519
2014-07-13 08:00:00	361.196	458.12	96.9238
2014-07-13 09:00:00	339.913	565.502	225.589
2014-07-13 10:00:00	248.094	635.005	386.911
2014-07-13 11:00:00	185.154	715.943	530.788
2014-07-13 12:00:00	209.761	838.293	628.531
2014-07-13 13:00:00	268.426	938.401	669.975
2014-07-13 14:00:00	364.181	1034.15	669.973
2014-07-13 15:00:00	485.424	1120.82	635.396
2014-07-13 16:00:00	597.189	1155.4	558.215
2014-07-13 17:00:00	774.662	1197.58	422.92
2014-07-13 18:00:00	948.458	1218.16	269.703
2014-07-13 19:00:00	1051.49	1171.38	119.89
2014-07-13 20:00:00	1114.94	1132.37	17.4352
2014-07-13 21:00:00	1040.63	1051.74	11.1099
2014-07-13 22:00:00	948.599	957.664	9.06532
2014-07-13 23:00:00	800.547	807.168	6.62092
2014-07-14	682.83	686.814	3.9845
2014-07-14 01:00:00	580.107	586.148	6.04072
2014-07-14 02:00:00	511.342	515.442	4.09938
2014-07-14 03:00:00	465.885	471.799	5.91465
2014-07-14 04:00:00	445.786	448.216	2.42973
2014-07-14 05:00:00	412.332	416.877	4.54515
2014-07-14 06:00:00	417.55	422.1	4.55028
2014-07-14 07:00:00	435.113	449.762	14.6487
2014-07-14 08:00:00	350.451	447.295	96.8441
2014-07-14 09:00:00	251.502	462.27	210.768
2014-07-14 10:00:00	121.172	489.008	367.836
2014-07-14 11:00:00	80.5186	577.322	496.803
2014-07-14 12:00:00	88.8753	668.46	579.585
2014-07-14 13:00:00	81.6632	747.517	665.854
2014-07-14 14:00:00	280.278	836.817	556.539
2014-07-14 15:00:00	334.779	964.845	630.066
2014-07-14 16:00:00	487	1037.54	550.542
2014-07-14 17:00:00	716.749	1139.71	422.957
2014-07-14 18:00:00	958.673	1225.43	266.756
2014-07-14 19:00:00	1081.33	1197.61	116.281
2014-07-14 20:00:00	1140.68	1158.3	17.6247
2014-07-14 21:00:00	1077.44	1090.58	13.1445
2014-07-14 22:00:00	965.687	977.261	11.5737
2014-07-14 23:00:00	800.133	809.828	9.69423
2014-07-15	685.272	694.114	8.84158
2014-07-15 01:00:00	586.009	592.066	6.05685
2014-07-15 02:00:00	533.253	539.801	6.5485
2014-07-15 03:00:00	488.166	491.907	3.74085
2014-07-15 04:00:00	464.097	469.129	5.03183
2014-07-15 05:00:00	431.556	435.886	4.32965
2014-07-15 06:00:00	431.725	435.515	3.78998
2014-07-15 07:00:00	422.699	432.464	9.7647
2014-07-15 08:00:00	366.018	435.707	69.6894
2014-07-15 09:00:00	302.643	419.426	116.783
2014-07-15 10:00:00	257.955	446.233	188.278
2014-07-15 11:00:00	279.356	469.954	190.598
2014-07-15 12:00:00	178.675	527.165	348.49
2014-07-15 13:00:00	129.833	594.106	464.273
2014-07-15 14:00:00	214.228	669.558	455.329
2014-07-15 15:00:00	401.637	718.367	316.73
2014-07-15 16:00:00	529.628	847.14	317.512
2014-07-15 17:00:00	701.735	908.511	206.777
2014-07-15 18:00:00	882.422	923.34	40.9181
2014-07-15 19:00:00	918.765	928.296	9.531
2014-07-15 20:00:00	832.525	841.452	8.92678
2014-07-15 21:00:00	766.424	775.295	8.87083
2014-07-15 22:00:00	682.346	690.908	8.56205
2014-07-15 23:00:00	559.72	564.361	4.64127
2014-07-16	466.16	468.536	2.37555
2014-07-16 01:00:00	409.503	412.833	3.33008
2014-07-16 02:00:00	369.396	371.349	1.95387
2014-07-16 03:00:00	364.108	365.882	1.77402
2014-07-16 04:00:00	337.178	339.023	1.845
2014-07-16 05:00:00	331.496	334.165	2.66935
2014-07-16 06:00:00	363.854	367.195	3.34108
2014-07-16 07:00:00	360.733	389.199	28.4659
2014-07-16 08:00:00	275.967	396.727	120.76
2014-07-16 09:00:00	162.121	403.103	240.982
2014-07-16 10:00:00	88.6557	430.814	342.158
2014-07-16 11:00:00	15.0805	530.495	515.414
2014-07-16 12:00:00	111.576	589.126	477.551
2014-07-16 13:00:00	158.381	670.361	511.98
2014-07-16 14:00:00	98.6078	754.611	656.003
2014-07-16 15:00:00	242.915	855.601	612.686
2014-07-16 16:00:00	413.86	971.119	557.259
2014-07-16 17:00:00	660.666	1077.79	417.12
2014-07-16 18:00:00	903.084	1080.59	177.506
2014-07-16 19:00:00	977.553	1034.97	57.4166
2014-07-16 20:00:00	950.911	964.391	13.4798
2014-07-16 21:00:00	891.133	900.495	9.36245
2014-07-16 22:00:00	857.756	867.766	10.0091
2014-07-16 23:00:00	702.037	706.841	4.80368
2014-07-17	584.567	588.855	4.28823
2014-07-17 01:00:00	511.812	516.6	4.7872
2014-07-17 02:00:00	468.877	471.899	3.02215
2014-07-17 03:00:00	449.505	453.971	4.4656
2014-07-17 04:00:00	431.176	434.685	3.50918
2014-07-17 05:00:00	416.833	418.98	2.14685
2014-07-17 06:00:00	417.966	422.058	4.09257
2014-07-17 07:00:00	408.301	426.622	18.3204
2014-07-17 08:00:00	386.777	435.876	49.0994
2014-07-17 09:00:00	224.846	430.553	205.706
2014-07-17 10:00:00	274.564	445.626	171.062
2014-07-17 11:00:00	261.906	498.097	236.191
2014-07-17 12:00:00	255.096	545.529	290.433
2014-07-17 13:00:00	365.182	581.541	216.359
2014-07-17 14:00:00	364.776	601.693	236.917
2014-07-17 15:00:00	290.037	670.553	380.515
2014-07-17 16:00:00	473.814	731.266	257.452
2014-07-17 17:00:00	571.14	813.657	242.517
2014-07-17 18:00:00	775.391	882.6	107.209
2014-07-17 19:00:00	839.147	851.536	12.389
2014-07-17 20:00:00	863.048	871.267	8.21972
2014-07-17 21:00:00	815.826	825.936	10.1097
2014-07-17 22:00:00	738.341	744.583	6.24203
2014-07-17 23:00:00	582.202	588.546	6.34405
2014-07-18	494.601	497.105	2.50413
2014-07-18 01:00:00	424.559	428.948	4.38875
2014-07-18 02:00:00	382.759	385.825	3.06568
2014-07-18 03:00:00	379.112	380.32	1.20732
2014-07-18 04:00:00	378.259	381.239	2.98035
2014-07-18 05:00:00	338.335	340.219	1.88472
2014-07-18 06:00:00	352.738	355.685	2.94638
2014-07-18 07:00:00	359.392	381.862	22.47
2014-07-18 08:00:00	274.121	370.259	96.1386
2014-07-18 09:00:00	250.924	358.493	107.569
2014-07-18 10:00:00	302.04	400.415	98.3754
2014-07-18 11:00:00	314.021	419.362	105.341
2014-07-18 12:00:00	327.326	417.854	90.5285
2014-07-18 13:00:00	309.82	420.202	110.381
2014-07-18 14:00:00	283.911	424.178	140.267
2014-07-18 15:00:00	249.619	448.434	198.815
2014-07-18 16:00:00	325.024	482.348	157.325
2014-07-18 17:00:00	422.228	508.989	86.7611
2014-07-18 18:00:00	451.885	505.406	53.5207
2014-07-18 19:00:00	513.567	536.211	22.6438
2014-07-18 20:00:00	556.75	562.586	5.83583
2014-07-18 21:00:00	578.558	583.814	5.25632
2014-07-18 22:00:00	533.872	540.628	6.75627
2014-07-18 23:00:00	463.007	466.306	3.29923
2014-07-19	380.97	383.179	2.2098
2014-07-19 01:00:00	328.778	330.222	1.44417
2014-07-19 02:00:00	291.99	294.011	2.02115
2014-07-19 03:00:00	279.442	280.672	1.23022
2014-07-19 04:00:00	256.333	257.236	0.902867
2014-07-19 05:00:00	261.863	263.132	1.26875
2014-07-19 06:00:00	272.67	273.97	1.3005
2014-07-19 07:00:00	274.36	300.015	25.6558
2014-07-19 08:00:00	237.003	336.539	99.5362
2014-07-19 09:00:00	156.439	369.865	213.426
2014-07-19 10:00:00	91.1905	416.081	324.891
2014-07-19 11:00:00	20.2521	462.14	441.888
2014-07-19 12:00:00	67.3903	542.378	474.988
2014-07-19 13:00:00	326.989	581.893	254.903
2014-07-19 14:00:00	383.825	600.889	217.064
2014-07-19 15:00:00	86.0353	640.92	554.885
2014-07-19 16:00:00	223.688	720.099	496.411
2014-07-19 17:00:00	481.173	772.28	291.107
2014-07-19 18:00:00	587.327	791.531	204.203
2014-07-19 19:00:00	658.42	750.748	92.3282
2014-07-19 20:00:00	729.061	736.815	7.75397
2014-07-19 21:00:00	739.125	743.003	3.87755
2014-07-19 22:00:00	674.795	682.319	7.52405
2014-07-19 23:00:00	574.483	576.949	2.46552
2014-07-20	472.729	474.436	1.70692
2014-07-20 01:00:00	408.672	409.962	1.29012
2014-07-20 02:00:00	351.337	354.371	3.03462
2014-07-20 03:00:00	332.899	335.817	2.918
2014-07-20 04:00:00	331.69	332.767	1.07638
2014-07-20 05:00:00	304.903	306.008	1.1046
2014-07-20 06:00:00	310.18	312.022	1.84262
2014-07-20 07:00:00	316.919	327.553	10.6345
2014-07-20 08:00:00	294.97	382.577	87.6075
2014-07-20 09:00:00	281.1	428.707	147.607
2014-07-20 10:00:00	150.683	489.983	339.301
2014-07-20 11:00:00	93.9604	553.046	459.086
2014-07-20 12:00:00	102.625	678.791	576.166
2014-07-20 13:00:00	150.555	798.579	648.024
2014-07-20 14:00:00	247.319	885.469	638.15
2014-07-20 15:00:00	419.832	994.061	574.229
2014-07-20 16:00:00	561.924	1057.61	495.687
2014-07-20 17:00:00	712.065	1123.85	411.781
2014-07-20 18:00:00	857.192	1110.53	253.341
2014-07-20 19:00:00	981.756	1085.84	104.08
2014-07-20 20:00:00	1051.73	1068.05	16.3268
2014-07-20 21:00:00	1023.97	1034.6	10.6294
2014-07-20 22:00:00	939.647	951.45	11.8028
2014-07-20 23:00:00	807.858	818.016	10.1587
2014-07-21	666.197	672.864	6.66692
2014-07-21 01:00:00	603.576	610.174	6.59768
2014-07-21 02:00:00	532.465	538.224	5.75868
2014-07-21 03:00:00	466.742	472.857	6.11488
2014-07-21 04:00:00	439.188	443.265	4.07717
2014-07-21 05:00:00	415.307	417.781	2.47335
2014-07-21 06:00:00	415.16	419.513	4.35358
2014-07-21 07:00:00	399.678	436.41	36.7319
2014-07-21 08:00:00	316.169	444.103	127.935
2014-07-21 09:00:00	219.7	438	218.3
2014-07-21 10:00:00	109.218	501.372	392.154
2014-07-21 11:00:00	49.126	592.67	543.544
2014-07-21 12:00:00	68.5425	702.648	634.105
2014-07-21 13:00:00	101.873	780.608	678.735
2014-07-21 14:00:00	210.967	890.165	679.198
2014-07-21 15:00:00	340.097	985.059	644.962
2014-07-21 16:00:00	524.489	1078.49	554.004
2014-07-21 17:00:00	721.929	1144.72	422.794
2014-07-21 18:00:00	917.959	1180.63	262.672
2014-07-21 19:00:00	1061.68	1165.47	103.799
2014-07-21 20:00:00	1129.88	1145.81	15.9248
2014-07-21 21:00:00	1076.1	1088.48	12.3848
2014-07-21 22:00:00	990.413	996.963	6.55003
2014-07-21 23:00:00	827.954	836.7	8.74663
2014-07-22	686.97	696.788	9.81745
2014-07-22 01:00:00	593.494	597.735	4.2403
2014-07-22 02:00:00	522.036	527.434	5.39782
2014-07-22 03:00:00	486.115	489.768	3.65272
2014-07-22 04:00:00	443.614	447.189	3.57448
2014-07-22 05:00:00	410.162	415.095	4.93263
2014-07-22 06:00:00	418.369	422.248	3.87958
2014-07-22 07:00:00	381.614	420.612	38.9979
2014-07-22 08:00:00	284.333	401.926	117.593
2014-07-22 09:00:00	192.275	417.612	225.337
2014-07-22 10:00:00	40.5716	456.736	416.164
2014-07-22 11:00:00	30.1752	562.607	532.432
2014-07-22 12:00:00	138.252	644.523	506.272
2014-07-22 13:00:00	178.341	726.984	548.643
2014-07-22 14:00:00	161.03	791.292	630.262
2014-07-22 15:00:00	318.79	881.89	563.099
2014-07-22 16:00:00	478.037	965.064	487.027
2014-07-22 17:00:00	661.086	1078.8	417.713
2014-07-22 18:00:00	842.799	1105.69	262.894
2014-07-22 19:00:00	972.276	1075.41	103.134
2014-07-22 20:00:00	1043.1	1059.17	16.0706
2014-07-22 21:00:00	1002.15	1016.6	14.4482
2014-07-22 22:00:00	937.137	946.827	9.69037
2014-07-22 23:00:00	747.458	754.4	6.94188
2014-07-23	655.212	662.747	7.53515
2014-07-23 01:00:00	566.3	571.308	5.00782
2014-07-23 02:00:00	496.422	502.912	6.49057
2014-07-23 03:00:00	454.557	459.512	4.9547
2014-07-23 04:00:00	426.157	432.995	6.83792
2014-07-23 05:00:00	394.374	398.817	4.44333
2014-07-23 06:00:00	408.62	412.962	4.34243
2014-07-23 07:00:00	398.087	434.35	36.2627
2014-07-23 08:00:00	312.77	419.797	107.027
2014-07-23 09:00:00	197	436.153	239.153
2014-07-23 10:00:00	142.344	510.187	367.843
2014-07-23 11:00:00	237.466	586.899	349.433
2014-07-23 12:00:00	197.794	669.701	471.907
2014-07-23 13:00:00	257.489	763.729	506.24
2014-07-23 14:00:00	160.141	845.517	685.376
2014-07-23 15:00:00	325.01	913.689	588.679
2014-07-23 16:00:00	408.38	955.901	547.521
2014-07-23 17:00:00	653.933	1067.17	413.234
2014-07-23 18:00:00	958.515	1187.1	228.589
2014-07-23 19:00:00	1030.52	1114.78	84.2634
2014-07-23 20:00:00	1072.14	1080.76	8.6278
2014-07-23 21:00:00	1042.04	1049.89	7.85522
2014-07-23 22:00:00	920.969	932.674	11.7052
2014-07-23 23:00:00	769.258	775.552	6.29452
2014-07-24	644.132	649.628	5.49582
2014-07-24 01:00:00	550.978	554.075	3.09738
2014-07-24 02:00:00	473.493	475.572	2.07857
2014-07-24 03:00:00	451.233	455.133	3.89983
2014-07-24 04:00:00	422.463	424.235	1.77138
2014-07-24 05:00:00	393.862	398.717	4.85427
2014-07-24 06:00:00	406.039	407.814	1.77557
2014-07-24 07:00:00	430.705	436.063	5.35748
2014-07-24 08:00:00	401.998	425.123	23.1256
2014-07-24 09:00:00	265.13	386.981	121.851
2014-07-24 10:00:00	180.473	418.398	237.925
2014-07-24 11:00:00	14.4345	465.6	451.165
2014-07-24 12:00:00	-95.2194	542.417	637.637
2014-07-24 13:00:00	-52.3438	627.939	680.283
2014-07-24 14:00:00	143.804	724.999	581.195
2014-07-24 15:00:00	196.808	820.28	623.472
2014-07-24 16:00:00	452.418	927.299	474.881
2014-07-24 17:00:00	573.75	999.897	426.147
2014-07-24 18:00:00	795.116	1067.92	272.802
2014-07-24 19:00:00	970.357	1030.81	60.4496
2014-07-24 20:00:00	1001.36	1009.83	8.46797
2014-07-24 21:00:00	979.383	989.156	9.77315
2014-07-24 22:00:00	882.67	892.991	10.3211
2014-07-24 23:00:00	736.947	744.772	7.82453
2014-07-25	594.434	600.616	6.1817
2014-07-25 01:00:00	516.148	523.566	7.41757
2014-07-25 02:00:00	480.773	485.926	5.15213
2014-07-25 03:00:00	464.366	469.493	5.1274
2014-07-25 04:00:00	413.358	416.987	3.62962
2014-07-25 05:00:00	380.374	386.135	5.76048
2014-07-25 06:00:00	378.499	382.529	4.03007
2014-07-25 07:00:00	364.273	398.529	34.2555
2014-07-25 08:00:00	302.167	405.751	103.584
2014-07-25 09:00:00	201.155	438.439	237.284
2014-07-25 10:00:00	129.761	532.519	402.758
2014-07-25 11:00:00	72.502	618.335	545.833
2014-07-25 12:00:00	68.443	705.843	637.4
2014-07-25 13:00:00	141.665	768.261	626.596
2014-07-25 14:00:00	167.516	850.479	682.963
2014-07-25 15:00:00	302.647	957.938	655.291
2014-07-25 16:00:00	455.443	1029.55	574.109
2014-07-25 17:00:00	719.15	1126.08	406.931
2014-07-25 18:00:00	948.806	1153.41	204.602
2014-07-25 19:00:00	977.041	1087.37	110.325
2014-07-25 20:00:00	1033.04	1044.25	11.2068
2014-07-25 21:00:00	1011.11	1018.58	7.47213
2014-07-25 22:00:00	926.485	937.541	11.0557
2014-07-25 23:00:00	809.072	819.417	10.3452
2014-07-26	712.745	718.301	5.55692
2014-07-26 01:00:00	606.686	614.579	7.89397
2014-07-26 02:00:00	551.165	555.925	4.7594
2014-07-26 03:00:00	504.058	508.065	4.00652
2014-07-26 04:00:00	450.512	456.465	5.95315
2014-07-26 05:00:00	426.923	431.684	4.76105
2014-07-26 06:00:00	381.29	384.054	2.76392
2014-07-26 07:00:00	367.973	398.382	30.4087
2014-07-26 08:00:00	367.033	472.805	105.771
2014-07-26 09:00:00	305.567	544.748	239.181
2014-07-26 10:00:00	193.354	591.394	398.041
2014-07-26 11:00:00	156.765	693.913	537.148
2014-07-26 12:00:00	144.028	799.944	655.915
2014-07-26 13:00:00	177.569	884.041	706.473
2014-07-26 14:00:00	231.879	938.352	706.473
2014-07-26 15:00:00	382.853	1028.66	645.802
2014-07-26 16:00:00	578.24	1080.26	502.024
2014-07-26 17:00:00	763.718	1127.93	364.211
2014-07-26 18:00:00	895.837	1133.77	237.929
2014-07-26 19:00:00	980.857	1080.56	99.7037
2014-07-26 20:00:00	1028.42	1037.65	9.23253
2014-07-26 21:00:00	1009.36	1020.98	11.6222
2014-07-26 22:00:00	928.452	940.334	11.8821
2014-07-26 23:00:00	788.948	796.299	7.35135
2014-07-27	690.057	694.659	4.60212
2014-07-27 01:00:00	607.648	614.688	7.03993
2014-07-27 02:00:00	543.318	547.238	3.91993
2014-07-27 03:00:00	482.797	486.679	3.88193
2014-07-27 04:00:00	461.809	466.644	4.8352
2014-07-27 05:00:00	417.954	421.441	3.48678
2014-07-27 06:00:00	396.781	399.863	3.0824
2014-07-27 07:00:00	367.151	394.245	27.0942
2014-07-27 08:00:00	336.507	446.958	110.451
2014-07-27 09:00:00	240.078	502.123	262.044
2014-07-27 10:00:00	140.262	582.926	442.664
2014-07-27 11:00:00	139.467	701.471	562.004
2014-07-27 12:00:00	154.79	814.172	659.383
2014-07-27 13:00:00	206.109	914.775	708.666
2014-07-27 14:00:00	295.235	1000.03	704.791
2014-07-27 15:00:00	421.891	1085.8	663.913
2014-07-27 16:00:00	579.182	1153.79	574.603
2014-07-27 17:00:00	763.414	1197.64	434.228
2014-07-27 18:00:00	905.644	1170.42	264.78
2014-07-27 19:00:00	1024.46	1132.63	108.176
2014-07-27 20:00:00	1127.69	1140.58	12.8938
2014-07-27 21:00:00	1085.84	1093.54	7.69665
2014-07-27 22:00:00	1000.36	1010.45	10.0956
2014-07-27 23:00:00	823.094	828.703	5.6095
2014-07-28	699.885	706.553	6.66797
2014-07-28 01:00:00	570.338	572.408	2.07052
2014-07-28 02:00:00	506.094	508.361	2.26692
2014-07-28 03:00:00	468.053	473.629	5.5761
2014-07-28 04:00:00	442.756	444.75	1.994
2014-07-28 05:00:00	411.531	414.092	2.56045
2014-07-28 06:00:00	391.934	394.524	2.59042
2014-07-28 07:00:00	393.214	424.228	31.0148
2014-07-28 08:00:00	299.705	407.42	107.715
2014-07-28 09:00:00	232.635	467.157	234.522
2014-07-28 10:00:00	113.117	523.602	410.485
2014-07-28 11:00:00	32.6839	591.16	558.477
2014-07-28 12:00:00	41.2393	694.789	653.55
2014-07-28 13:00:00	80.9001	769.557	688.656
2014-07-28 14:00:00	171.331	848.461	677.13
2014-07-28 15:00:00	301.347	944.586	643.239
2014-07-28 16:00:00	460.339	1022.96	562.621
2014-07-28 17:00:00	683.769	1114.12	430.355
2014-07-28 18:00:00	953.872	1219.83	265.957
2014-07-28 19:00:00	1085.99	1185.19	99.2035
2014-07-28 20:00:00	1154.19	1161.45	7.25162
2014-07-28 21:00:00	1111.52	1118.73	7.20412
2014-07-28 22:00:00	966.897	974.911	8.01338
2014-07-28 23:00:00	817.349	821.675	4.3258
2014-07-29	676.914	683.276	6.36158
2014-07-29 01:00:00	590.566	596.041	5.4749
2014-07-29 02:00:00	521.843	521.942	0.0996
2014-07-29 03:00:00	488.109	491.832	3.72277
2014-07-29 04:00:00	443.396	445.301	1.9054
2014-07-29 05:00:00	422.082	423.471	1.38983
2014-07-29 06:00:00	393.119	394.797	1.67777
2014-07-29 07:00:00	384.345	413.374	29.0286
2014-07-29 08:00:00	331.641	431.414	99.7727
2014-07-29 09:00:00	209.156	430.681	221.525
2014-07-29 10:00:00	113.493	496.92	383.427
2014-07-29 11:00:00	49.7441	573.583	523.838
2014-07-29 12:00:00	64.4249	682.935	618.511
2014-07-29 13:00:00	142.942	780.145	637.203
2014-07-29 14:00:00	239.799	875.873	636.074
2014-07-29 15:00:00	352.132	985.246	633.114
2014-07-29 16:00:00	583.395	1062.88	479.484
2014-07-29 17:00:00	689.087	1091.2	402.113
2014-07-29 18:00:00	869.688	1091.38	221.688
2014-07-29 19:00:00	986.51	1044.04	57.5316
2014-07-29 20:00:00	1013.44	1021.2	7.76137
2014-07-29 21:00:00	981.701	988.577	6.87543
2014-07-29 22:00:00	883.823	893.054	9.23067
2014-07-29 23:00:00	723.956	727.638	3.6817
2014-07-30	606.49	612.588	6.09863
2014-07-30 01:00:00	525.402	527.802	2.40047
2014-07-30 02:00:00	477.118	479.706	2.58762
2014-07-30 03:00:00	466.411	467.896	1.48455
2014-07-30 04:00:00	439.286	441.695	2.40925
2014-07-30 05:00:00	393.412	394.303	0.89075
2014-07-30 06:00:00	387.69	392.76	5.06988
2014-07-30 07:00:00	380.831	412.694	31.8631
2014-07-30 08:00:00	267.817	393.891	126.074
2014-07-30 09:00:00	190.515	390.759	200.245
2014-07-30 10:00:00	70.2387	464.037	393.798
2014-07-30 11:00:00	-10.1237	514.211	524.335
2014-07-30 12:00:00	-17.7354	611.372	629.107
2014-07-30 13:00:00	33.5153	686.094	652.578
2014-07-30 14:00:00	118.605	757.597	638.992
2014-07-30 15:00:00	265.835	885.875	620.041
2014-07-30 16:00:00	415.715	954.578	538.863
2014-07-30 17:00:00	683.633	1073.37	389.737
2014-07-30 18:00:00	834.525	1101.93	267.402
2014-07-30 19:00:00	974.634	1069.88	95.2494
2014-07-30 20:00:00	1037.39	1053.6	16.2075
2014-07-30 21:00:00	1000.6	1008.66	8.06088
2014-07-30 22:00:00	915.1	922.939	7.83902
2014-07-30 23:00:00	784.079	786.109	2.02965
2014-07-31	645.205	650.955	5.75
2014-07-31 01:00:00	534.895	537.417	2.52272
2014-07-31 02:00:00	479.305	482.057	2.75238
2014-07-31 03:00:00	471.465	475.758	4.29302
2014-07-31 04:00:00	449.654	453.369	3.7148
2014-07-31 05:00:00	429.155	432.137	2.982
2014-07-31 06:00:00	425.931	428.285	2.35442
2014-07-31 07:00:00	439.078	456.487	17.4086
2014-07-31 08:00:00	374.872	425.158	50.2855
2014-07-31 09:00:00	291.128	421.393	130.265
2014-07-31 10:00:00	240.771	444.057	203.287
2014-07-31 11:00:00	111.825	503.327	391.503
2014-07-31 12:00:00	262.269	593.884	331.615
2014-07-31 13:00:00	273.29	635.933	362.644
2014-07-31 14:00:00	220.65	683.695	463.045
2014-07-31 15:00:00	235.013	808.456	573.443
2014-07-31 16:00:00	562.561	909.899	347.339
2014-07-31 17:00:00	672.013	1046.64	374.632
2014-07-31 18:00:00	852.668	1084.62	231.956
2014-07-31 19:00:00	936.401	1045.62	109.221
2014-07-31 20:00:00	994.387	1005.67	11.286
2014-07-31 21:00:00	981.874	991.92	10.0461
2014-07-31 22:00:00	855.057	868.097	13.04
2014-07-31 23:00:00	695.035	699.5	4.46475
2014-08-01	589.528	593.023	3.49527
2014-08-01 01:00:00	509.884	516.608	6.72458
2014-08-01 02:00:00	438.227	441.718	3.49075
2014-08-01 03:00:00	421.076	424.17	3.09487
2014-08-01 04:00:00	394.032	396.961	2.92877
2014-08-01 05:00:00	381.767	384.884	3.11672
2014-08-01 06:00:00	366.675	372.573	5.89857
2014-08-01 07:00:00	357.481	389.841	32.3608
2014-08-01 08:00:00	285.718	384.086	98.3682
2014-08-01 09:00:00	226.401	387.065	160.663
2014-08-01 10:00:00	122.71	401.346	278.635
2014-08-01 11:00:00	-10.9456	471.959	482.905
2014-08-01 12:00:00	-46.4338	543.665	590.098
2014-08-01 13:00:00	-82.6166	623.675	706.292
2014-08-01 14:00:00	-1.74685	669.539	671.286
2014-08-01 15:00:00	69.1325	745.86	676.728
2014-08-01 16:00:00	278.367	864.847	586.48
2014-08-01 17:00:00	584.314	962.693	378.379
2014-08-01 18:00:00	666.742	935.869	269.126
2014-08-01 19:00:00	831.871	899.284	67.4127
2014-08-01 20:00:00	828.861	837.852	8.99085
2014-08-01 21:00:00	821.146	826.641	5.49457
2014-08-01 22:00:00	732.696	741.065	8.36888
2014-08-01 23:00:00	599.863	605.295	5.43117
2014-08-02	492.052	495.328	3.27543
2014-08-02 01:00:00	430.939	433.616	2.67725
2014-08-02 02:00:00	385.254	386.987	1.73305
2014-08-02 03:00:00	359.204	361.047	1.84293
2014-08-02 04:00:00	340.806	343.75	2.94328
2014-08-02 05:00:00	310.196	312.865	2.66892
2014-08-02 06:00:00	283.118	285.999	2.88145
2014-08-02 07:00:00	276.363	304.339	27.9757
2014-08-02 08:00:00	256.039	360.804	104.765
2014-08-02 09:00:00	186.761	404.476	217.715
2014-08-02 10:00:00	139.183	458.352	319.169
2014-08-02 11:00:00	76.0116	512.744	436.732
2014-08-02 12:00:00	144.234	566.88	422.646
2014-08-02 13:00:00	-11.5246	596.894	608.418
2014-08-02 14:00:00	202.521	665.661	463.14
2014-08-02 15:00:00	222.132	725.171	503.039
2014-08-02 16:00:00	294.654	789.461	494.807
2014-08-02 17:00:00	467.075	823.497	356.422
2014-08-02 18:00:00	617.525	827.464	209.939
2014-08-02 19:00:00	723.396	786.346	62.9494
2014-08-02 20:00:00	732.483	739.403	6.92032
2014-08-02 21:00:00	732.407	737.104	4.6974
2014-08-02 22:00:00	680.949	689.91	8.96107
2014-08-02 23:00:00	580.141	583.079	2.93795
2014-08-03	486.023	488.367	2.3441
2014-08-03 01:00:00	415.82	418.612	2.79228
2014-08-03 02:00:00	357.497	363.415	5.91828
2014-08-03 03:00:00	328.381	331.41	3.02937
2014-08-03 04:00:00	316.409	318.864	2.45447
2014-08-03 05:00:00	304.408	307.239	2.8308
2014-08-03 06:00:00	298.686	300.818	2.13282
2014-08-03 07:00:00	297.115	321.608	24.4929
2014-08-03 08:00:00	284.057	385.352	101.295
2014-08-03 09:00:00	214.526	447.5	232.974
2014-08-03 10:00:00	114.24	516.62	402.38
2014-08-03 11:00:00	137.807	591.026	453.22
2014-08-03 12:00:00	114.691	672.082	557.391
2014-08-03 13:00:00	48.5939	738.805	690.211
2014-08-03 14:00:00	118.687	789.144	670.457
2014-08-03 15:00:00	237.265	888.34	651.075
2014-08-03 16:00:00	421.313	968.536	547.224
2014-08-03 17:00:00	596.733	997.833	401.1
2014-08-03 18:00:00	776.181	1019.69	243.512
2014-08-03 19:00:00	885.216	963.084	77.8679
2014-08-03 20:00:00	941.23	940.219	-1.01113
2014-08-03 21:00:00	926.664	929.395	2.7311
2014-08-03 22:00:00	824.26	826.676	2.41587
2014-08-03 23:00:00	693.985	693.048	-0.936267
2014-08-04	572.627	575.264	2.63635
2014-08-04 01:00:00	478.744	481.464	2.71932
2014-08-04 02:00:00	420.762	422.245	1.4827
2014-08-04 03:00:00	403.29	405.025	1.7343
2014-08-04 04:00:00	393.266	394.761	1.49473
2014-08-04 05:00:00	366.28	368.262	1.9819
2014-08-04 06:00:00	364.699	369.501	4.80137
2014-08-04 07:00:00	375.753	405.908	30.1555
2014-08-04 08:00:00	270.039	386.838	116.799
2014-08-04 09:00:00	184.42	416.049	231.629
2014-08-04 10:00:00	87.2951	467.691	380.396
2014-08-04 11:00:00	82.1656	545.781	463.616
2014-08-04 12:00:00	86.4928	656.69	570.197
2014-08-04 13:00:00	101.243	742.732	641.489
2014-08-04 14:00:00	192.768	792.53	599.761
2014-08-04 15:00:00	376.614	876.271	499.657
2014-08-04 16:00:00	456.723	968.781	512.058
2014-08-04 17:00:00	594.365	1037.56	443.198
2014-08-04 18:00:00	793.198	1056.29	263.097
2014-08-04 19:00:00	940.917	1019.61	78.6901
2014-08-04 20:00:00	986.573	988.7	2.12633
2014-08-04 21:00:00	955.272	958.094	2.82242
2014-08-04 22:00:00	857.574	860.591	3.01672
2014-08-04 23:00:00	694.22	694.391	0.17075
2014-08-05	580.865	582.802	1.93698
2014-08-05 01:00:00	479.787	483.37	3.58315
2014-08-05 02:00:00	433.069	435.55	2.4804
2014-08-05 03:00:00	400.702	403.068	2.36625
2014-08-05 04:00:00	382.423	384.901	2.47755
2014-08-05 05:00:00	356.862	361.945	5.08322
2014-08-05 06:00:00	359.139	361.083	1.94328
2014-08-05 07:00:00	362.466	385.881	23.4146
2014-08-05 08:00:00	295.68	392.14	96.4594
2014-08-05 09:00:00	184.086	412.962	228.876
2014-08-05 10:00:00	85.332	473.485	388.153
2014-08-05 11:00:00	8.20098	541.324	533.123
2014-08-05 12:00:00	19.0672	652.43	633.363
2014-08-05 13:00:00	60.8791	738.405	677.526
2014-08-05 14:00:00	142.496	830.444	687.948
2014-08-05 15:00:00	266.046	913.832	647.786
2014-08-05 16:00:00	463.019	1022.68	559.658
2014-08-05 17:00:00	679.028	1099.94	420.917
2014-08-05 18:00:00	911.783	1161.07	249.289
2014-08-05 19:00:00	1070.18	1139.84	69.6553
2014-08-05 20:00:00	1125.84	1131.33	5.49197
2014-08-05 21:00:00	1075.07	1080.26	5.1916
2014-08-05 22:00:00	967.2	969.888	2.68737
2014-08-05 23:00:00	799.185	799.612	0.427083
2014-08-06	678.999	683.899	4.90058
2014-08-06 01:00:00	579.237	581.675	2.43753
2014-08-06 02:00:00	523.212	525.893	2.68148
2014-08-06 03:00:00	479.773	482.309	2.53558
2014-08-06 04:00:00	437.193	443.495	6.30235
2014-08-06 05:00:00	417.9	419.979	2.07892
2014-08-06 06:00:00	401.559	403.864	2.30503
2014-08-06 07:00:00	399.725	425.831	26.1056
2014-08-06 08:00:00	311.238	395.852	84.6135
2014-08-06 09:00:00	204.603	431.785	227.182
2014-08-06 10:00:00	105.807	500.767	394.96
2014-08-06 11:00:00	73.044	582.625	509.581
2014-08-06 12:00:00	75.9421	690.756	614.814
2014-08-06 13:00:00	78.204	773.771	695.567
2014-08-06 14:00:00	182.901	868.908	686.007
2014-08-06 15:00:00	406.995	961.538	554.543
2014-08-06 16:00:00	514.29	1061.23	546.941
2014-08-06 17:00:00	731.148	1150.93	419.785
2014-08-06 18:00:00	920.857	1171.66	250.801
2014-08-06 19:00:00	1082.23	1163.32	81.0926
2014-08-06 20:00:00	1132.29	1131.14	-1.15537
2014-08-06 21:00:00	1079.82	1077.18	-2.63322
2014-08-06 22:00:00	993.077	994.351	1.27387
2014-08-06 23:00:00	830.439	827.661	-2.77753
2014-08-07	683.757	683.004	-0.753383
2014-08-07 01:00:00	602.5	602.328	-0.171967
2014-08-07 02:00:00	542.048	541.082	-0.96665
2014-08-07 03:00:00	528.89	528.423	-0.467167
2014-08-07 04:00:00	484.593	488.042	3.4492
2014-08-07 05:00:00	452.158	452.063	-0.0947667
2014-08-07 06:00:00	436.384	436.692	0.30885
2014-08-07 07:00:00	419.628	447.985	28.3567
2014-08-07 08:00:00	362.507	455.873	93.3659
2014-08-07 09:00:00	219.488	451.729	232.241
2014-08-07 10:00:00	132.448	532.559	400.111
2014-08-07 11:00:00	110.294	649.275	538.982
2014-08-07 12:00:00	131.857	770.654	638.797
2014-08-07 13:00:00	185.274	867.586	682.311
2014-08-07 14:00:00	299.508	980.716	681.208
2014-08-07 15:00:00	408.769	1044.01	635.237
2014-08-07 16:00:00	551.257	1090.53	539.271
2014-08-07 17:00:00	751.62	1190.96	439.34
2014-08-07 18:00:00	1057.77	1294.45	236.684
2014-08-07 19:00:00	1166.57	1241.71	75.14
2014-08-07 20:00:00	1210.99	1220.03	9.0379
2014-08-07 21:00:00	1149	1156.94	7.93983
2014-08-07 22:00:00	1024.98	1035.41	10.4381
2014-08-07 23:00:00	909.208	913.102	3.89357
2014-08-08	776.569	784.729	8.1603
2014-08-08 01:00:00	649.117	652.533	3.41573
2014-08-08 02:00:00	594.114	596.496	2.38188
2014-08-08 03:00:00	537.13	544.053	6.92293
2014-08-08 04:00:00	505.577	509.24	3.66262
2014-08-08 05:00:00	474.314	477.112	2.79745
2014-08-08 06:00:00	451.651	454.481	2.83015
2014-08-08 07:00:00	455.261	481.733	26.4722
2014-08-08 08:00:00	343.52	450.093	106.573
2014-08-08 09:00:00	275.191	503.503	228.312
2014-08-08 10:00:00	180.053	572.268	392.215
2014-08-08 11:00:00	122.624	664.662	542.038
2014-08-08 12:00:00	126.792	766.168	639.377
2014-08-08 13:00:00	180.435	868.641	688.206
2014-08-08 14:00:00	261.295	949.748	688.453
2014-08-08 15:00:00	387.904	1040.18	652.271
2014-08-08 16:00:00	591.962	1119.54	527.577
2014-08-08 17:00:00	754.78	1183.95	429.169
2014-08-08 18:00:00	997.006	1247.34	250.336
2014-08-08 19:00:00	1099.14	1205.43	106.284
2014-08-08 20:00:00	1173.03	1180.29	7.26333
2014-08-08 21:00:00	1135.3	1138.29	2.98723
2014-08-08 22:00:00	1044.66	1052.92	8.25942
2014-08-08 23:00:00	923.553	927.577	4.02393
2014-08-09	790.899	797.903	7.00473
2014-08-09 01:00:00	686.777	690.854	4.07718
2014-08-09 02:00:00	607.11	610.352	3.24243
2014-08-09 03:00:00	553.044	557.651	4.60653
2014-08-09 04:00:00	515.945	516.948	1.00258
2014-08-09 05:00:00	486.093	488.157	2.06437
2014-08-09 06:00:00	451.623	457.13	5.5065
2014-08-09 07:00:00	427.254	447.721	20.4672
2014-08-09 08:00:00	389.873	488.5	98.6272
2014-08-09 09:00:00	314.287	570.924	256.637
2014-08-09 10:00:00	257.011	637.193	380.182
2014-08-09 11:00:00	211.379	762.757	551.378
2014-08-09 12:00:00	220.464	873.849	653.385
2014-08-09 13:00:00	227.244	925.613	698.369
2014-08-09 14:00:00	291.146	992.67	701.525
2014-08-09 15:00:00	434.326	1094.4	660.074
2014-08-09 16:00:00	605.37	1171.75	566.377
2014-08-09 17:00:00	788.399	1221.64	433.236
2014-08-09 18:00:00	962.843	1233.16	270.313
2014-08-09 19:00:00	1055.95	1164.89	108.94
2014-08-09 20:00:00	1111.22	1119.18	7.95672
2014-08-09 21:00:00	1056.85	1065.69	8.83743
2014-08-09 22:00:00	970.846	981.455	10.609
2014-08-09 23:00:00	888.07	891.264	3.19393
2014-08-10	772.005	779.365	7.36005
2014-08-10 01:00:00	688.602	691.395	2.79292
2014-08-10 02:00:00	614.29	620.277	5.9867
2014-08-10 03:00:00	575.841	578.721	2.8801
2014-08-10 04:00:00	530.748	533.432	2.68442
2014-08-10 05:00:00	493.82	496.512	2.69275
2014-08-10 06:00:00	448.791	452.256	3.46488
2014-08-10 07:00:00	434.243	453.919	19.6757
2014-08-10 08:00:00	403.137	497.287	94.1504
2014-08-10 09:00:00	380.087	605.652	225.565
2014-08-10 10:00:00	298.741	686.041	387.3
2014-08-10 11:00:00	297.978	828.484	530.506
2014-08-10 12:00:00	251.876	879.203	627.327
2014-08-10 13:00:00	313.713	996.064	682.351
2014-08-10 14:00:00	439.846	1091.21	651.36
2014-08-10 15:00:00	526.775	1170.42	643.645
2014-08-10 16:00:00	614.968	949.536	334.568
2014-08-10 17:00:00	799.559	1021.27	221.713
2014-08-10 18:00:00	1120.78	1333.76	212.98
2014-08-10 19:00:00	1195.04	1272.27	77.2249
2014-08-10 20:00:00	1226	1234.58	8.57822
2014-08-10 21:00:00	1170.29	1175.37	5.08317
2014-08-10 22:00:00	1048.22	1057.32	9.10033
2014-08-10 23:00:00	888.141	893.519	5.37788
2014-08-11	770.27	776.129	5.85905
2014-08-11 01:00:00	663.541	667.8	4.25875
2014-08-11 02:00:00	621.579	624.683	3.10355
2014-08-11 03:00:00	576.509	581.783	5.27453
2014-08-11 04:00:00	525.004	526.335	1.33053
2014-08-11 05:00:00	472.614	474.938	2.3246
2014-08-11 06:00:00	476.018	482.333	6.31555
2014-08-11 07:00:00	479.857	500.999	21.1418
2014-08-11 08:00:00	389.501	485.252	95.7512
2014-08-11 09:00:00	287.881	516.019	228.137
2014-08-11 10:00:00	217.573	597.992	380.419
2014-08-11 11:00:00	150.994	665.734	514.74
2014-08-11 12:00:00	184.974	797.969	612.995
2014-08-11 13:00:00	289.301	942.27	652.969
2014-08-11 14:00:00	428.612	1052.69	624.078
2014-08-11 15:00:00	851.957	1060.54	208.579
2014-08-11 16:00:00	898.192	978.568	80.3757
2014-08-11 17:00:00	881.675	946.856	65.1812
2014-08-11 18:00:00	900.833	938.6	37.7664
2014-08-11 19:00:00	876.709	885.436	8.72677
2014-08-11 20:00:00	846.933	848.168	1.23487
2014-08-11 21:00:00	824.315	834.373	10.0578
2014-08-11 22:00:00	773.756	778.644	4.88833
2014-08-11 23:00:00	626.4	631.062	4.66232
2014-08-12	515.835	519.933	4.09758
2014-08-12 01:00:00	456.536	460.873	4.33763
2014-08-12 02:00:00	411.42	413.486	2.06647
2014-08-12 03:00:00	391.506	394.289	2.78257
2014-08-12 04:00:00	372.007	375.372	3.3653
2014-08-12 05:00:00	361.472	363.725	2.25285
2014-08-12 06:00:00	380.551	381.444	0.893083
2014-08-12 07:00:00	385.3	403.797	18.4971
2014-08-12 08:00:00	314.969	411.504	96.5354
2014-08-12 09:00:00	182.014	431.344	249.33
2014-08-12 10:00:00	98.4708	502.239	403.768
2014-08-12 11:00:00	57.8053	584.8	526.995
2014-08-12 12:00:00	110.578	704.564	593.987
2014-08-12 13:00:00	177.875	793.26	615.385
2014-08-12 14:00:00	295.169	884.747	589.578
2014-08-12 15:00:00	402.574	989.107	586.533
2014-08-12 16:00:00	676.261	1045.33	369.068
2014-08-12 17:00:00	843.909	1144.89	300.979
2014-08-12 18:00:00	978.267	1187.33	209.065
2014-08-12 19:00:00	1128.42	1148.3	19.8765
2014-08-12 20:00:00	1092.34	1095.71	3.3674
2014-08-12 21:00:00	1037.13	1044.3	7.16917
2014-08-12 22:00:00	904.674	908.017	3.34312
2014-08-12 23:00:00	760.826	761.39	0.56365
2014-08-13	631.228	632.783	1.55513
2014-08-13 01:00:00	528.776	528.801	0.0252833
2014-08-13 02:00:00	424.54	425.265	0.72415
2014-08-13 03:00:00	400.078	401.874	1.7964
2014-08-13 04:00:00	360.971	360.681	-0.29015
2014-08-13 05:00:00	330.205	331.65	1.44443
2014-08-13 06:00:00	348.494	350.961	2.46628
2014-08-13 07:00:00	344.431	364.377	19.9458
2014-08-13 08:00:00	269.463	361.318	91.8548
2014-08-13 09:00:00	167.706	405.968	238.262
2014-08-13 10:00:00	58.1224	459.934	401.811
2014-08-13 11:00:00	-13.4496	532.78	546.229
2014-08-13 12:00:00	-47.3196	592.627	639.947
2014-08-13 13:00:00	-30.3576	661.96	692.317
2014-08-13 14:00:00	70.186	766.442	696.256
2014-08-13 15:00:00	222.814	873.106	650.292
2014-08-13 16:00:00	415.366	978.763	563.397
2014-08-13 17:00:00	665.491	1084.86	419.366
2014-08-13 18:00:00	869.368	1110.38	241.016
2014-08-13 19:00:00	981.239	1053.09	71.8508
2014-08-13 20:00:00	1011.55	1009.32	-2.23575
2014-08-13 21:00:00	960.927	960.501	-0.425533
2014-08-13 22:00:00	874.899	876.673	1.77407
2014-08-13 23:00:00	714.246	712.557	-1.68933
2014-08-14	562.978	561.864	-1.11423
2014-08-14 01:00:00	466.428	468.086	1.65875
2014-08-14 02:00:00	423.928	422.926	-1.00247
2014-08-14 03:00:00	383.713	384.122	0.40855
2014-08-14 04:00:00	347.132	347.48	0.348183
2014-08-14 05:00:00	327.509	328.011	0.502683
2014-08-14 06:00:00	334.617	334.805	0.188
2014-08-14 07:00:00	350.11	370.482	20.3722
2014-08-14 08:00:00	271.445	365.373	93.9278
2014-08-14 09:00:00	175.805	411.584	235.779
2014-08-14 10:00:00	59.4044	455.989	396.584
2014-08-14 11:00:00	28.5355	571.133	542.597
2014-08-14 12:00:00	17.4669	668.392	650.925
2014-08-14 13:00:00	81.4431	754.75	673.307
2014-08-14 14:00:00	139.309	834.165	694.856
2014-08-14 15:00:00	265.314	921.454	656.14
2014-08-14 16:00:00	481.92	1045.92	564.001
2014-08-14 17:00:00	726.365	1151.52	425.157
2014-08-14 18:00:00	919.093	1161.91	242.819
2014-08-14 19:00:00	1053.51	1129.43	75.9219
2014-08-14 20:00:00	1083.85	1091.96	8.108
2014-08-14 21:00:00	1040.63	1048.29	7.65442
2014-08-14 22:00:00	952.534	961.919	9.38408
2014-08-14 23:00:00	806.166	808.919	2.75285
2014-08-15	692.868	694.313	1.44552
2014-08-15 01:00:00	582.119	585.623	3.50348
2014-08-15 02:00:00	516.033	517.027	0.993933
2014-08-15 03:00:00	484.339	485.414	1.07477
2014-08-15 04:00:00	444.545	447.845	3.30003
2014-08-15 05:00:00	408.51	412.751	4.24032
2014-08-15 06:00:00	412.304	414.544	2.2403
2014-08-15 07:00:00	419.245	442.806	23.5609
2014-08-15 08:00:00	342.81	438.971	96.1609
2014-08-15 09:00:00	240.669	453.852	213.183
2014-08-15 10:00:00	154.059	541.457	387.398
2014-08-15 11:00:00	87.3355	642.097	554.761
2014-08-15 12:00:00	71.3747	710.406	639.031
2014-08-15 13:00:00	161.332	834.224	672.892
2014-08-15 14:00:00	276.589	917.609	641.02
2014-08-15 15:00:00	387.131	1039.9	652.769
2014-08-15 16:00:00	583.134	1138.72	555.586
2014-08-15 17:00:00	768.544	1184.51	415.97
2014-08-15 18:00:00	1002.82	1217.2	214.377
2014-08-15 19:00:00	1101.76	1175.41	73.6528
2014-08-15 20:00:00	1086.89	1094.2	7.30903
2014-08-15 21:00:00	1019.53	1029.43	9.89475
2014-08-15 22:00:00	948.414	954.031	5.61787
2014-08-15 23:00:00	808.07	811.719	3.649
2014-08-16	716.976	722.114	5.13808
2014-08-16 01:00:00	623.385	626.476	3.09087
2014-08-16 02:00:00	556.672	561.341	4.66932
2014-08-16 03:00:00	518.847	522.41	3.56267
2014-08-16 04:00:00	485.691	487.664	1.97353
2014-08-16 05:00:00	469.393	474.144	4.75098
2014-08-16 06:00:00	428.736	432.637	3.90113
2014-08-16 07:00:00	421.157	459.931	38.7735
2014-08-16 08:00:00	386.985	509.901	122.916
2014-08-16 09:00:00	334.211	570.166	235.955
2014-08-16 10:00:00	314.707	682.745	368.038
2014-08-16 11:00:00	269.205	779.956	510.751
2014-08-16 12:00:00	228.284	881.263	652.979
2014-08-16 13:00:00	329.52	1024.52	695.004
2014-08-16 14:00:00	412.081	1119.7	707.615
2014-08-16 15:00:00	540.287	1192.69	652.401
2014-08-16 16:00:00	697.007	1244.38	547.373
2014-08-16 17:00:00	928.486	1280.16	351.672
2014-08-16 18:00:00	1010.2	1242.27	232.063
2014-08-16 19:00:00	1118.37	1174.19	55.8215
2014-08-16 20:00:00	1095.55	1101.03	5.47875
2014-08-16 21:00:00	1070.93	1075.39	4.4621
2014-08-16 22:00:00	1006.93	1009.37	2.43847
2014-08-16 23:00:00	906.784	912.266	5.48225
2014-08-17	801.832	802.881	1.04867
2014-08-17 01:00:00	700.319	702.764	2.44443
2014-08-17 02:00:00	613.875	618.006	4.13083
2014-08-17 03:00:00	573.791	574.905	1.11382
2014-08-17 04:00:00	517.105	520.223	3.11762
2014-08-17 05:00:00	506.406	509.097	2.69172
2014-08-17 06:00:00	477.303	478.247	0.943633
2014-08-17 07:00:00	443.787	473.187	29.4001
2014-08-17 08:00:00	458.215	524.011	65.7961
2014-08-17 09:00:00	425.549	552.844	127.295
2014-08-17 10:00:00	218.161	621.165	403.004
2014-08-17 11:00:00	383.443	735.761	352.317
2014-08-17 12:00:00	429.699	807.374	377.675
2014-08-17 13:00:00	400.56	908.366	507.806
2014-08-17 14:00:00	408.517	1018.77	610.252
2014-08-17 15:00:00	461.987	1100.96	638.975
2014-08-17 16:00:00	650.081	1206.18	556.099
2014-08-17 17:00:00	829.888	1238.54	408.651
2014-08-17 18:00:00	1077.53	1215.01	137.484
2014-08-17 19:00:00	1087.38	1119.97	32.596
2014-08-17 20:00:00	1069.58	1069.36	-0.22145
2014-08-17 21:00:00	1052.39	1058.6	6.21313
2014-08-17 22:00:00	932.27	935.517	3.2464
2014-08-17 23:00:00	827.809	825.94	-1.86868
2014-08-18	727.729	732.791	5.06248
2014-08-18 01:00:00	623.749	623.188	-0.5608
2014-08-18 02:00:00	562.991	562.318	-0.673117
2014-08-18 03:00:00	538.429	543.333	4.9037
2014-08-18 04:00:00	524.922	526.585	1.66244
2014-08-18 05:00:00	472.442	473.394	0.951583
2014-08-18 06:00:00	452.197	452.985	0.788233
2014-08-18 07:00:00	457.916	483.324	25.4073
2014-08-18 08:00:00	367.505	472.123	104.618
2014-08-18 09:00:00	316.821	511.556	194.735
2014-08-18 10:00:00	227.498	557.899	330.402
2014-08-18 11:00:00	147.945	605.157	457.212
2014-08-18 12:00:00	98.9634	744.569	645.606
2014-08-18 13:00:00	194.944	892.914	697.97
2014-08-18 14:00:00	318.042	962.222	644.18
2014-08-18 15:00:00	489.56	1054.75	565.185
2014-08-18 16:00:00	622.423	1176.35	553.929
2014-08-18 17:00:00	862.648	1250.06	387.414
2014-08-18 18:00:00	1153.08	1257.89	104.806
2014-08-18 19:00:00	1187.29	1215.87	28.5791
2014-08-18 20:00:00	1172.04	1179.83	7.78462
2014-08-18 21:00:00	1122.51	1129.9	7.38757
2014-08-18 22:00:00	1019.46	1028.91	9.44815
2014-08-18 23:00:00	881.566	889.575	8.00822
2014-08-19	751.712	756.897	5.18417
2014-08-19 01:00:00	629.659	635.865	6.20607
2014-08-19 02:00:00	609.956	614.084	4.12787
2014-08-19 03:00:00	542.131	547.227	5.09563
2014-08-19 04:00:00	511.339	515.89	4.55112
2014-08-19 05:00:00	487.777	490.142	2.36522
2014-08-19 06:00:00	459	461.999	2.99935
2014-08-19 07:00:00	466.215	489.742	23.5275
2014-08-19 08:00:00	347.737	447.921	100.184
2014-08-19 09:00:00	242.038	455.699	213.661
2014-08-19 10:00:00	105.093	548.249	443.156
2014-08-19 11:00:00	126.166	591.459	465.293
2014-08-19 12:00:00	265.305	660.75	395.445
2014-08-19 13:00:00	273.695	704.672	430.977
2014-08-19 14:00:00	267.456	777.019	509.563
2014-08-19 15:00:00	401.043	855.633	454.59
2014-08-19 16:00:00	641.829	917.833	276.004
2014-08-19 17:00:00	818.333	1001.92	183.587
2014-08-19 18:00:00	978.31	1058.78	80.472
2014-08-19 19:00:00	1044.05	1054	9.95292
2014-08-19 20:00:00	1041.68	1049.17	7.48955
2014-08-19 21:00:00	1045.61	1056.92	11.3073
2014-08-19 22:00:00	959.828	970.402	10.5736
2014-08-19 23:00:00	814.813	818.4	3.5867
2014-08-20	720.004	726.097	6.09282
2014-08-20 01:00:00	625.433	626.574	1.14093
2014-08-20 02:00:00	549.159	548.326	-0.833133
2014-08-20 03:00:00	524.599	529.425	4.82653
2014-08-20 04:00:00	487.282	491.166	3.88375
2014-08-20 05:00:00	477.537	477.963	0.426333
2014-08-20 06:00:00	483.224	485.526	2.30138
2014-08-20 07:00:00	494.124	518.731	24.6071
2014-08-20 08:00:00	376.787	472.78	95.9932
2014-08-20 09:00:00	303.493	513.448	209.955
2014-08-20 10:00:00	173.229	578.805	405.576
2014-08-20 11:00:00	214.551	691.021	476.47
2014-08-20 12:00:00	136.375	777.181	640.807
2014-08-20 13:00:00	211.872	877.238	665.367
2014-08-20 14:00:00	237.834	943.596	705.762
2014-08-20 15:00:00	453.312	1043.73	590.419
2014-08-20 16:00:00	571.303	1133.41	562.105
2014-08-20 17:00:00	880.993	1216.86	335.865
2014-08-20 18:00:00	1058.88	1283.03	224.152
2014-08-20 19:00:00	1158.83	1211.71	52.8779
2014-08-20 20:00:00	1180.5	1180.31	-0.191133
2014-08-20 21:00:00	1167.38	1165.47	-1.91533
2014-08-20 22:00:00	1062.21	1065.42	3.21087
2014-08-20 23:00:00	891.197	891.521	0.32375
2014-08-21	750.821	751.443	0.62225
2014-08-21 01:00:00	654.525	652.813	-1.71243
2014-08-21 02:00:00	609.2	610.408	1.20783
2014-08-21 03:00:00	562.63	561.923	-0.706783
2014-08-21 04:00:00	549.022	548.721	-0.300967
2014-08-21 05:00:00	521.269	524.339	3.06985
2014-08-21 06:00:00	512.087	510.915	-1.17207
2014-08-21 07:00:00	528.524	548.187	19.663
2014-08-21 08:00:00	408.638	503.268	94.6297
2014-08-21 09:00:00	274.609	523.718	249.109
2014-08-21 10:00:00	192.391	610.138	417.747
2014-08-21 11:00:00	133.962	703.21	569.248
2014-08-21 12:00:00	103.279	773.892	670.613
2014-08-21 13:00:00	151.423	867.435	716.012
2014-08-21 14:00:00	269.867	979.581	709.714
2014-08-21 15:00:00	431.254	1092	660.743
2014-08-21 16:00:00	595.355	1158.32	562.97
2014-08-21 17:00:00	820.133	1224.24	404.109
2014-08-21 18:00:00	1034.14	1248.11	213.968
2014-08-21 19:00:00	1179.21	1228.25	49.0405
2014-08-21 20:00:00	1207.12	1212.47	5.34268
2014-08-21 21:00:00	1137.05	1145.03	7.97582
2014-08-21 22:00:00	1026.43	1034.85	8.41385
2014-08-21 23:00:00	896.379	900.486	4.10705
2014-08-22	774.15	782.471	8.32047
2014-08-22 01:00:00	680.124	685.186	5.06205
2014-08-22 02:00:00	636.138	642.102	5.96407
2014-08-22 03:00:00	582.647	589.297	6.65042
2014-08-22 04:00:00	562.606	571.699	9.09315
2014-08-22 05:00:00	515.917	521.625	5.70813
2014-08-22 06:00:00	514.988	523.966	8.97778
2014-08-22 07:00:00	512.252	536.541	24.2895
2014-08-22 08:00:00	387.148	495.95	108.803
2014-08-22 09:00:00	290.499	547.899	257.4
2014-08-22 10:00:00	212.965	628.971	416.006
2014-08-22 11:00:00	160.68	725.023	564.344
2014-08-22 12:00:00	171.057	838.553	667.496
2014-08-22 13:00:00	209.507	919.985	710.478
2014-08-22 14:00:00	302.243	1015.6	713.355
2014-08-22 15:00:00	458.726	1122.28	663.55
2014-08-22 16:00:00	647.308	1216.52	569.217
2014-08-22 17:00:00	857.75	1278.47	420.719
2014-08-22 18:00:00	1067.45	1287.13	219.677
2014-08-22 19:00:00	1170.56	1226.32	55.7587
2014-08-22 20:00:00	1169.5	1178.35	8.84865
2014-08-22 21:00:00	1126.81	1133.02	6.20842
2014-08-22 22:00:00	1034.21	1044.45	10.2438
2014-08-22 23:00:00	900.275	911.725	11.4497
2014-08-23	765.905	771.011	5.1061
2014-08-23 01:00:00	654.854	664.792	9.93832
2014-08-23 02:00:00	587.374	593.593	6.21918
2014-08-23 03:00:00	529.826	539.651	9.82498
2014-08-23 04:00:00	504.426	509.245	4.81837
2014-08-23 05:00:00	463.137	468.993	5.856
2014-08-23 06:00:00	417.731	422.566	4.83432
[truncated: 187 more rows]

## Sheet: pivot_statistics
Row Labels	Average of sum_use	StdDev of sum_use2	Average of sum_grid	StdDev of sum_grid2	Average of sum_gen	StdDev of sum_gen2
2014-06-01 23:00:00	623.023	#DIV/0!	618.508	#DIV/0!	4.51535	#DIV/0!
2014-06-02 23:00:00	655.642	#DIV/0!	650.593	#DIV/0!	5.04905	#DIV/0!
2014-06-03 23:00:00	645.801	#DIV/0!	645.596	#DIV/0!	0.204967	#DIV/0!
2014-06-04 23:00:00	639.301	#DIV/0!	636.207	#DIV/0!	3.09423	#DIV/0!
2014-06-05 23:00:00	665.853	#DIV/0!	663.318	#DIV/0!	2.53535	#DIV/0!
2014-06-06 23:00:00	669.079	#DIV/0!	669.245	#DIV/0!	-0.1661	#DIV/0!
2014-06-07 23:00:00	662.874	#DIV/0!	657.701	#DIV/0!	5.17237	#DIV/0!
2014-06-08 23:00:00	648.437	#DIV/0!	647.681	#DIV/0!	0.755817	#DIV/0!
2014-06-09 23:00:00	532.603	#DIV/0!	533.254	#DIV/0!	-0.650517	#DIV/0!
2014-06-10 23:00:00	577.885	#DIV/0!	577.209	#DIV/0!	0.675533	#DIV/0!
2014-06-11 23:00:00	747.611	#DIV/0!	747.729	#DIV/0!	-0.11805	#DIV/0!
2014-06-12 23:00:00	563.047	#DIV/0!	563.2	#DIV/0!	-0.153117	#DIV/0!
2014-06-13 23:00:00	619.398	#DIV/0!	615.946	#DIV/0!	3.45222	#DIV/0!
2014-06-14 23:00:00	605.491	#DIV/0!	602.362	#DIV/0!	3.12942	#DIV/0!
2014-06-15 23:00:00	688.066	#DIV/0!	685.102	#DIV/0!	2.96452	#DIV/0!
2014-06-16 23:00:00	682.274	#DIV/0!	672.157	#DIV/0!	10.1167	#DIV/0!
2014-06-17 23:00:00	666.169	#DIV/0!	657.38	#DIV/0!	8.78922	#DIV/0!
2014-06-18 23:00:00	652.231	#DIV/0!	646.397	#DIV/0!	5.83422	#DIV/0!
2014-06-19 23:00:00	636.515	#DIV/0!	629.842	#DIV/0!	6.67343	#DIV/0!
2014-06-20 23:00:00	632.765	#DIV/0!	625.315	#DIV/0!	7.45067	#DIV/0!
2014-06-21 23:00:00	668.736	#DIV/0!	665.423	#DIV/0!	3.31232	#DIV/0!
2014-06-22 23:00:00	612.927	#DIV/0!	607.892	#DIV/0!	5.03502	#DIV/0!
2014-06-23 23:00:00	645.774	#DIV/0!	639.235	#DIV/0!	6.53933	#DIV/0!
2014-06-24 23:00:00	603.467	#DIV/0!	600.077	#DIV/0!	3.39035	#DIV/0!
2014-06-25 23:00:00	540.396	#DIV/0!	535.598	#DIV/0!	4.7977	#DIV/0!
2014-06-26 23:00:00	617.201	#DIV/0!	611.806	#DIV/0!	5.39477	#DIV/0!
2014-06-27 23:00:00	622.453	#DIV/0!	611.918	#DIV/0!	10.5352	#DIV/0!
2014-06-28 23:00:00	686.927	#DIV/0!	681.283	#DIV/0!	5.64437	#DIV/0!
2014-06-29 23:00:00	693.3	#DIV/0!	688.478	#DIV/0!	4.8229	#DIV/0!
2014-06-30 23:00:00	707.732	#DIV/0!	704.581	#DIV/0!	3.1511	#DIV/0!
2014-07-01 23:00:00	702.957	#DIV/0!	691.753	#DIV/0!	11.2044	#DIV/0!
2014-07-02 23:00:00	738.506	#DIV/0!	728.689	#DIV/0!	9.81692	#DIV/0!
2014-07-03 23:00:00	554.829	#DIV/0!	549.503	#DIV/0!	5.32615	#DIV/0!
2014-07-04 23:00:00	576.468	#DIV/0!	569.749	#DIV/0!	6.7193	#DIV/0!
2014-07-05 23:00:00	591.834	#DIV/0!	587.329	#DIV/0!	4.50545	#DIV/0!
2014-07-06 23:00:00	707.3	#DIV/0!	696.205	#DIV/0!	11.0945	#DIV/0!
2014-07-07 23:00:00	743.795	#DIV/0!	735.228	#DIV/0!	8.5668	#DIV/0!
2014-07-08 23:00:00	771.804	#DIV/0!	762.958	#DIV/0!	8.84538	#DIV/0!
2014-07-09 23:00:00	734.246	#DIV/0!	724.798	#DIV/0!	9.4478	#DIV/0!
2014-07-10 23:00:00	667.356	#DIV/0!	661.729	#DIV/0!	5.62728	#DIV/0!
2014-07-11 23:00:00	644.268	#DIV/0!	638.533	#DIV/0!	5.73462	#DIV/0!
2014-07-12 23:00:00	752.344	#DIV/0!	746.177	#DIV/0!	6.16693	#DIV/0!
2014-07-13 23:00:00	807.168	#DIV/0!	800.547	#DIV/0!	6.62092	#DIV/0!
2014-07-14 23:00:00	809.828	#DIV/0!	800.133	#DIV/0!	9.69423	#DIV/0!
2014-07-15 23:00:00	564.361	#DIV/0!	559.72	#DIV/0!	4.64127	#DIV/0!
2014-07-16 23:00:00	706.841	#DIV/0!	702.037	#DIV/0!	4.80368	#DIV/0!
2014-07-17 23:00:00	588.546	#DIV/0!	582.202	#DIV/0!	6.34405	#DIV/0!
2014-07-18 23:00:00	466.306	#DIV/0!	463.007	#DIV/0!	3.29923	#DIV/0!
2014-07-19 23:00:00	576.949	#DIV/0!	574.483	#DIV/0!	2.46552	#DIV/0!
2014-07-20 23:00:00	818.016	#DIV/0!	807.858	#DIV/0!	10.1587	#DIV/0!
2014-07-21 23:00:00	836.7	#DIV/0!	827.954	#DIV/0!	8.74663	#DIV/0!
2014-07-22 23:00:00	754.4	#DIV/0!	747.458	#DIV/0!	6.94188	#DIV/0!
2014-07-23 23:00:00	775.552	#DIV/0!	769.258	#DIV/0!	6.29452	#DIV/0!
2014-07-24 23:00:00	744.772	#DIV/0!	736.947	#DIV/0!	7.82453	#DIV/0!
2014-07-25 23:00:00	819.417	#DIV/0!	809.072	#DIV/0!	10.3452	#DIV/0!
2014-07-26 23:00:00	796.299	#DIV/0!	788.948	#DIV/0!	7.35135	#DIV/0!
2014-07-27 23:00:00	828.703	#DIV/0!	823.094	#DIV/0!	5.6095	#DIV/0!
2014-07-28 23:00:00	821.675	#DIV/0!	817.349	#DIV/0!	4.3258	#DIV/0!
2014-07-29 23:00:00	727.638	#DIV/0!	723.956	#DIV/0!	3.6817	#DIV/0!
2014-07-30 23:00:00	786.109	#DIV/0!	784.079	#DIV/0!	2.02965	#DIV/0!
2014-07-31 23:00:00	699.5	#DIV/0!	695.035	#DIV/0!	4.46475	#DIV/0!
2014-08-01 23:00:00	605.295	#DIV/0!	599.863	#DIV/0!	5.43117	#DIV/0!
2014-08-02 23:00:00	583.079	#DIV/0!	580.141	#DIV/0!	2.93795	#DIV/0!
2014-08-03 23:00:00	693.048	#DIV/0!	693.985	#DIV/0!	-0.936267	#DIV/0!
2014-08-04 23:00:00	694.391	#DIV/0!	694.22	#DIV/0!	0.17075	#DIV/0!
2014-08-05 23:00:00	799.612	#DIV/0!	799.185	#DIV/0!	0.427083	#DIV/0!
2014-08-06 23:00:00	827.661	#DIV/0!	830.439	#DIV/0!	-2.77753	#DIV/0!
2014-08-07 23:00:00	913.102	#DIV/0!	909.208	#DIV/0!	3.89357	#DIV/0!
2014-08-08 23:00:00	927.577	#DIV/0!	923.553	#DIV/0!	4.02393	#DIV/0!
2014-08-09 23:00:00	891.264	#DIV/0!	888.07	#DIV/0!	3.19393	#DIV/0!
2014-08-10 23:00:00	893.519	#DIV/0!	888.141	#DIV/0!	5.37788	#DIV/0!
2014-08-11 23:00:00	631.062	#DIV/0!	626.4	#DIV/0!	4.66232	#DIV/0!
2014-08-12 23:00:00	761.39	#DIV/0!	760.826	#DIV/0!	0.56365	#DIV/0!
2014-08-13 23:00:00	712.557	#DIV/0!	714.246	#DIV/0!	-1.68933	#DIV/0!
2014-08-14 23:00:00	808.919	#DIV/0!	806.166	#DIV/0!	2.75285	#DIV/0!
2014-08-15 23:00:00	811.719	#DIV/0!	808.07	#DIV/0!	3.649	#DIV/0!
2014-08-16 23:00:00	912.266	#DIV/0!	906.784	#DIV/0!	5.48225	#DIV/0!
2014-08-17 23:00:00	825.94	#DIV/0!	827.809	#DIV/0!	-1.86868	#DIV/0!
2014-08-18 23:00:00	889.575	#DIV/0!	881.566	#DIV/0!	8.00822	#DIV/0!
2014-08-19 23:00:00	818.4	#DIV/0!	814.813	#DIV/0!	3.5867	#DIV/0!
2014-08-20 23:00:00	891.521	#DIV/0!	891.197	#DIV/0!	0.32375	#DIV/0!
2014-08-21 23:00:00	900.486	#DIV/0!	896.379	#DIV/0!	4.10705	#DIV/0!
2014-08-22 23:00:00	911.725	#DIV/0!	900.275	#DIV/0!	11.4497	#DIV/0!
2014-08-23 23:00:00	891.673	#DIV/0!	883.93	#DIV/0!	7.7433	#DIV/0!
2014-08-24 23:00:00	873.914	#DIV/0!	868.948	#DIV/0!	4.96612	#DIV/0!
2014-08-25 23:00:00	913.953	#DIV/0!	905.055	#DIV/0!	8.89857	#DIV/0!
2014-08-26 23:00:00	782.391	#DIV/0!	776.034	#DIV/0!	6.35763	#DIV/0!
2014-08-27 23:00:00	761.996	#DIV/0!	756.164	#DIV/0!	5.83172	#DIV/0!
2014-08-28 23:00:00	781.945	#DIV/0!	775.153	#DIV/0!	6.79178	#DIV/0!
2014-08-29 23:00:00	672.983	#DIV/0!	666.947	#DIV/0!	6.03598	#DIV/0!
2014-08-30 23:00:00	803.07	#DIV/0!	792.788	#DIV/0!	10.2821	#DIV/0!
Grand Total	719.929	108.438	714.98	107.895	4.94862	3.28717
