# Supplementary material
Source: MDPI journal article supplement (https://www.mdpi.com/2073-4336/8/4/45)
Supplement: s1 [file s1 › Part 1 - Data/Microgrid Load (Pecan Street)/subquery_winter(sum).xlsx]

## Sheet: subquery_winter(sum)
localhour	sum_grid	sum_use	sum_gen
2014-12-01	261.356	260.86	-0.495933
2014-12-01 01:00:00	217.994	217.581	-0.413147
2014-12-01 02:00:00	210.077	207.449	-2.6281
2014-12-01 03:00:00	200.431	198.458	-1.97317
2014-12-01 04:00:00	206.809	205.51	-1.2986
2014-12-01 05:00:00	214.443	212.637	-1.8062
2014-12-01 06:00:00	271.606	269.958	-1.64795
2014-12-01 07:00:00	341.464	340.313	-1.15073
2014-12-01 08:00:00	306.509	318.587	12.0774
2014-12-01 09:00:00	239.918	294.181	54.2624
2014-12-01 10:00:00	149.905	293.764	143.859
2014-12-01 11:00:00	148.35	296.803	148.453
2014-12-01 12:00:00	106.498	299.884	193.386
2014-12-01 13:00:00	97.2503	308.163	210.913
2014-12-01 14:00:00	208.542	305.254	96.7121
2014-12-01 15:00:00	272.65	316.455	43.8045
2014-12-01 16:00:00	338.393	352.568	14.1752
2014-12-01 17:00:00	473.611	472.458	-1.15353
2014-12-01 18:00:00	567.095	558.101	-8.99422
2014-12-01 19:00:00	582.504	578.552	-3.9525
2014-12-01 20:00:00	564.923	562.453	-2.46958
2014-12-01 21:00:00	503.116	499.028	-4.08755
2014-12-01 22:00:00	444.708	439.381	-5.32692
2014-12-01 23:00:00	341.099	338.38	-2.71883
2014-12-02	291.444	290.118	-1.32657
2014-12-02 01:00:00	268.346	266.839	-1.5068
2014-12-02 02:00:00	259.999	258.569	-1.42983
2014-12-02 03:00:00	274.785	273.456	-1.32975
2014-12-02 04:00:00	277.397	276.16	-1.23743
2014-12-02 05:00:00	323.736	322.225	-1.51105
2014-12-02 06:00:00	427.286	425.896	-1.39028
2014-12-02 07:00:00	447.495	455.993	8.49822
2014-12-02 08:00:00	303.806	375.26	71.4547
2014-12-02 09:00:00	156.414	332.516	176.102
2014-12-02 10:00:00	62.4344	343.679	281.245
2014-12-02 11:00:00	-36.499	328.106	364.605
2014-12-02 12:00:00	118.42	328.079	209.659
2014-12-02 13:00:00	171.5	311.248	139.748
2014-12-02 14:00:00	176.313	310.527	134.214
2014-12-02 15:00:00	242.201	321.163	78.9613
2014-12-02 16:00:00	312.011	346.379	34.3678
2014-12-02 17:00:00	476.21	475.751	-0.4586
2014-12-02 18:00:00	530.526	529.034	-1.49245
2014-12-02 19:00:00	536.066	537.191	1.12487
2014-12-02 20:00:00	553.223	552.287	-0.936733
2014-12-02 21:00:00	495.714	493.343	-2.37128
2014-12-02 22:00:00	432.625	426.947	-5.67783
2014-12-02 23:00:00	336.786	334.077	-2.70878
2014-12-03	269.431	267.9	-1.53103
2014-12-03 01:00:00	245.399	244.169	-1.22942
2014-12-03 02:00:00	226.827	225.472	-1.35508
2014-12-03 03:00:00	239.298	238.248	-1.05003
2014-12-03 04:00:00	247.534	246.709	-0.824283
2014-12-03 05:00:00	271.248	269.781	-1.46675
2014-12-03 06:00:00	363.944	362.516	-1.42763
2014-12-03 07:00:00	390.375	388.712	-1.66333
2014-12-03 08:00:00	318.195	328.858	10.6623
2014-12-03 09:00:00	233.84	306.051	72.211
2014-12-03 10:00:00	199.866	309.351	109.485
2014-12-03 11:00:00	194.074	304.011	109.938
2014-12-03 12:00:00	200.191	311.878	111.687
2014-12-03 13:00:00	192.211	302.523	110.312
2014-12-03 14:00:00	165.038	294.203	129.164
2014-12-03 15:00:00	179.396	286.57	107.174
2014-12-03 16:00:00	281.096	301.521	20.4252
2014-12-03 17:00:00	380.94	379.02	-1.92023
2014-12-03 18:00:00	485.027	484.209	-0.817933
2014-12-03 19:00:00	514.866	513.518	-1.34772
2014-12-03 20:00:00	494.091	493.263	-0.82765
2014-12-03 21:00:00	467.909	465.637	-2.27193
2014-12-03 22:00:00	402.643	398.463	-4.17955
2014-12-03 23:00:00	302.899	301.206	-1.6936
2014-12-04	245.499	244.523	-0.975267
2014-12-04 01:00:00	213.599	212.47	-1.12867
2014-12-04 02:00:00	210.184	209.019	-1.16425
2014-12-04 03:00:00	205.56	204.599	-0.960667
2014-12-04 04:00:00	225.813	225.082	-0.730917
2014-12-04 05:00:00	246.605	245.414	-1.19103
2014-12-04 06:00:00	295.406	294.718	-0.6873
2014-12-04 07:00:00	335.001	335.129	0.12775
2014-12-04 08:00:00	273.997	297.428	23.4311
2014-12-04 09:00:00	257.331	304.642	47.3104
2014-12-04 10:00:00	191.778	298.942	107.164
2014-12-04 11:00:00	151.47	286.588	135.118
2014-12-04 12:00:00	212.917	292.027	79.1094
2014-12-04 13:00:00	172.585	275.652	103.067
2014-12-04 14:00:00	203.143	271.429	68.2857
2014-12-04 15:00:00	245.722	278.62	32.8985
2014-12-04 16:00:00	236.404	302.058	65.6537
2014-12-04 17:00:00	373.104	374.633	1.52903
2014-12-04 18:00:00	459.336	458.218	-1.11773
2014-12-04 19:00:00	501.362	500.744	-0.617817
2014-12-04 20:00:00	495.762	500.078	4.31622
2014-12-04 21:00:00	459.622	461.218	1.59657
2014-12-04 22:00:00	395.118	393.114	-2.00452
2014-12-04 23:00:00	305.003	306.61	1.60758
2014-12-05	237.453	236.225	-1.2278
2014-12-05 01:00:00	204.792	203.487	-1.30475
2014-12-05 02:00:00	190.776	189.568	-1.20727
2014-12-05 03:00:00	193.934	192.509	-1.42495
2014-12-05 04:00:00	198.8	197.71	-1.09073
2014-12-05 05:00:00	217.85	216.358	-1.49213
2014-12-05 06:00:00	275.029	274.265	-0.764683
2014-12-05 07:00:00	318.81	322.228	3.41755
2014-12-05 08:00:00	221.999	297.445	75.4467
2014-12-05 09:00:00	170.408	301.967	131.559
2014-12-05 10:00:00	173.744	292.997	119.254
2014-12-05 11:00:00	3.85568	293.424	289.568
2014-12-05 12:00:00	25.6094	287.7	262.091
2014-12-05 13:00:00	-171.134	278.757	449.891
2014-12-05 14:00:00	18.3445	279.044	260.699
2014-12-05 15:00:00	146.685	297.131	150.447
2014-12-05 16:00:00	177.766	317.449	139.683
2014-12-05 17:00:00	371.377	379.606	8.22858
2014-12-05 18:00:00	469.363	460.618	-8.74577
2014-12-05 19:00:00	452.038	448.841	-3.19748
2014-12-05 20:00:00	472.924	470.856	-2.0675
2014-12-05 21:00:00	454.507	451.796	-2.71112
2014-12-05 22:00:00	413.591	411.915	-1.6762
2014-12-05 23:00:00	324.51	323.391	-1.11825
2014-12-06	243.249	241.597	-1.65232
2014-12-06 01:00:00	209.03	207.434	-1.59605
2014-12-06 02:00:00	199.315	198.05	-1.26453
2014-12-06 03:00:00	210.702	209.398	-1.30403
2014-12-06 04:00:00	207.224	206.471	-0.752067
2014-12-06 05:00:00	218.333	217.602	-0.730967
2014-12-06 06:00:00	216.142	214.999	-1.14313
2014-12-06 07:00:00	264.051	263.356	-0.6948
2014-12-06 08:00:00	298.892	315.41	16.5181
2014-12-06 09:00:00	295.925	360.139	64.2136
2014-12-06 10:00:00	247.159	372.261	125.102
2014-12-06 11:00:00	177.974	399.199	221.225
2014-12-06 12:00:00	-65.8632	385.074	450.937
2014-12-06 13:00:00	-233.597	350.563	584.16
2014-12-06 14:00:00	-179.891	353.256	533.147
2014-12-06 15:00:00	-43.0796	364.266	407.345
2014-12-06 16:00:00	207.261	387.948	180.687
2014-12-06 17:00:00	438.27	447.83	9.55958
2014-12-06 18:00:00	478.171	477.647	-0.523283
2014-12-06 19:00:00	482.964	482.211	-0.752429
2014-12-06 20:00:00	461.976	461.689	-0.2869
2014-12-06 21:00:00	450.302	450.448	0.1463
2014-12-06 22:00:00	430.829	429.199	-1.63012
2014-12-06 23:00:00	342.228	339.101	-3.12745
2014-12-07	281.235	278.938	-2.29708
2014-12-07 01:00:00	228.893	226.881	-2.0115
2014-12-07 02:00:00	203.902	203.113	-0.788933
2014-12-07 03:00:00	218.426	217.995	-0.4307
2014-12-07 04:00:00	217.343	216.412	-0.931583
2014-12-07 05:00:00	228.943	228.165	-0.77825
2014-12-07 06:00:00	256.715	255.977	-0.738083
2014-12-07 07:00:00	284.607	285.565	0.958167
2014-12-07 08:00:00	333.402	352.728	19.3258
2014-12-07 09:00:00	355.258	408.203	52.9453
2014-12-07 10:00:00	382.114	444.003	61.8893
2014-12-07 11:00:00	301.956	432.305	130.349
2014-12-07 12:00:00	277.218	406.435	129.217
2014-12-07 13:00:00	340.212	417.506	77.2933
2014-12-07 14:00:00	359.685	428.79	69.1052
2014-12-07 15:00:00	387.674	443.024	55.3507
2014-12-07 16:00:00	478.389	488.572	10.1831
2014-12-07 17:00:00	546.973	544.629	-2.3444
2014-12-07 18:00:00	568.179	566.975	-1.20317
2014-12-07 19:00:00	562.759	558.796	-3.96262
2014-12-07 20:00:00	539.828	537.638	-2.1897
2014-12-07 21:00:00	498.936	497.346	-1.58978
2014-12-07 22:00:00	438.037	436.617	-1.42068
2014-12-07 23:00:00	350.396	349.211	-1.1853
2014-12-08	288.2	287.742	-0.458533
2014-12-08 01:00:00	241.825	241.029	-0.795433
2014-12-08 02:00:00	211.884	210.853	-1.03098
2014-12-08 03:00:00	229.612	228.649	-0.96245
2014-12-08 04:00:00	244.502	243.204	-1.29795
2014-12-08 05:00:00	270.493	269.55	-0.943167
2014-12-08 06:00:00	344.016	342.912	-1.10375
2014-12-08 07:00:00	382.129	386.386	4.25762
2014-12-08 08:00:00	285.615	340.121	54.5069
2014-12-08 09:00:00	174.576	303.339	128.762
2014-12-08 10:00:00	94.1746	308.276	214.101
2014-12-08 11:00:00	-87.6866	307.979	395.666
2014-12-08 12:00:00	-312.967	313.925	626.892
2014-12-08 13:00:00	-334.242	285.175	619.417
2014-12-08 14:00:00	-269.944	276.793	546.737
2014-12-08 15:00:00	-128.094	267.959	396.053
2014-12-08 16:00:00	120.809	294.339	173.53
2014-12-08 17:00:00	385.326	396.245	10.9182
2014-12-08 18:00:00	508.296	509.15	0.853183
2014-12-08 19:00:00	529.045	529.196	0.150617
2014-12-08 20:00:00	536.736	536.79	0.0538167
2014-12-08 21:00:00	472.135	470.784	-1.35055
2014-12-08 22:00:00	409.541	408.532	-1.00925
2014-12-08 23:00:00	330.334	329.331	-1.0033
2014-12-09	264.378	264.307	-0.0716833
2014-12-09 01:00:00	231.469	231.471	0.00126667
2014-12-09 02:00:00	222.76	222.418	-0.342283
2014-12-09 03:00:00	247.128	246.884	-0.2441
2014-12-09 04:00:00	246.122	245.486	-0.636483
2014-12-09 05:00:00	273.509	273.139	-0.369867
2014-12-09 06:00:00	355.8	355.771	-0.0290833
2014-12-09 07:00:00	397.484	414.018	16.5342
2014-12-09 08:00:00	186.602	335.975	149.372
2014-12-09 09:00:00	-13.7605	297.478	311.239
2014-12-09 10:00:00	-81.615	305.757	387.372
2014-12-09 11:00:00	-248.7	298.39	547.09
2014-12-09 12:00:00	-259.759	282.229	541.988
2014-12-09 13:00:00	-253.194	273.373	526.567
2014-12-09 14:00:00	-177.538	260.145	437.683
2014-12-09 15:00:00	8.28282	271.161	262.878
2014-12-09 16:00:00	183.6	293.028	109.428
2014-12-09 17:00:00	410.664	409.882	-0.781667
2014-12-09 18:00:00	486.407	488.997	2.58985
2014-12-09 19:00:00	513.421	515.441	2.01997
2014-12-09 20:00:00	501.355	502.212	0.857167
2014-12-09 21:00:00	468.194	468.828	0.634483
2014-12-09 22:00:00	423.937	423.914	-0.023
2014-12-09 23:00:00	348.553	347.862	-0.691
2014-12-10	278.505	277.803	-0.701283
2014-12-10 01:00:00	229.66	229.21	-0.449683
2014-12-10 02:00:00	233.597	233.424	-0.172533
2014-12-10 03:00:00	239.111	238.514	-0.597017
2014-12-10 04:00:00	250.867	250.461	-0.406217
2014-12-10 05:00:00	267.185	266.583	-0.601683
2014-12-10 06:00:00	329.339	329.099	-0.239867
2014-12-10 07:00:00	365.414	370.975	5.56153
2014-12-10 08:00:00	270.675	343.646	72.9709
2014-12-10 09:00:00	203.963	303.983	100.021
2014-12-10 10:00:00	158.075	299.476	141.401
2014-12-10 11:00:00	168.208	301.335	133.127
2014-12-10 12:00:00	67.1472	290.568	223.421
2014-12-10 13:00:00	51.8942	296.92	245.026
2014-12-10 14:00:00	199.808	272.69	72.8815
2014-12-10 15:00:00	198.238	276.428	78.1899
2014-12-10 16:00:00	317.755	335.831	18.0758
2014-12-10 17:00:00	432.384	432.56	0.176083
2014-12-10 18:00:00	512.174	511.857	-0.31785
2014-12-10 19:00:00	516.789	518.175	1.38552
2014-12-10 20:00:00	505.402	504.957	-0.445717
2014-12-10 21:00:00	472.432	469.609	-2.82242
2014-12-10 22:00:00	413.905	410.579	-3.32648
2014-12-10 23:00:00	323.923	323.022	-0.90045
2014-12-11	258.878	258.011	-0.867833
2014-12-11 01:00:00	222.662	222.116	-0.546233
2014-12-11 02:00:00	206.021	205.463	-0.55745
2014-12-11 03:00:00	213.523	213.025	-0.497533
2014-12-11 04:00:00	208.947	208.383	-0.563667
2014-12-11 05:00:00	230.239	229.666	-0.57375
2014-12-11 06:00:00	296.044	295.278	-0.766083
2014-12-11 07:00:00	348.983	347.463	-1.5194
2014-12-11 08:00:00	317.565	330.272	12.7078
2014-12-11 09:00:00	232.982	304.426	71.4448
2014-12-11 10:00:00	138.929	298.032	159.103
2014-12-11 11:00:00	146.234	321.441	175.207
2014-12-11 12:00:00	71.8271	302.86	231.033
2014-12-11 13:00:00	89.4381	293.485	204.047
2014-12-11 14:00:00	197.244	287.977	90.7334
2014-12-11 15:00:00	258.292	304.76	46.4683
2014-12-11 16:00:00	315.324	337.321	21.997
2014-12-11 17:00:00	427.95	428.757	0.806467
2014-12-11 18:00:00	493.988	494.904	0.916283
2014-12-11 19:00:00	509.009	511.917	2.90828
2014-12-11 20:00:00	502.461	502.33	-0.131517
2014-12-11 21:00:00	475.684	474.997	-0.687117
2014-12-11 22:00:00	408.883	406.519	-2.3644
2014-12-11 23:00:00	322.301	320.404	-1.89748
2014-12-12	263.275	261.322	-1.95352
2014-12-12 01:00:00	224.099	222.259	-1.84007
2014-12-12 02:00:00	212.376	210.936	-1.44073
2014-12-12 03:00:00	232.664	231.344	-1.32007
2014-12-12 04:00:00	220.755	219.235	-1.52025
2014-12-12 05:00:00	224.912	223.63	-1.28143
2014-12-12 06:00:00	267.312	265.342	-1.97033
2014-12-12 07:00:00	315.179	315.187	0.00848333
2014-12-12 08:00:00	275.013	308.923	33.9102
2014-12-12 09:00:00	174.885	299.824	124.938
2014-12-12 10:00:00	158.891	313.983	155.092
2014-12-12 11:00:00	198.585	297.286	98.7015
2014-12-12 12:00:00	150.047	301.724	151.677
2014-12-12 13:00:00	147.761	308.898	161.137
2014-12-12 14:00:00	111.067	291.93	180.863
2014-12-12 15:00:00	200.997	298.071	97.0747
2014-12-12 16:00:00	285.606	324.358	38.7515
2014-12-12 17:00:00	404.746	406.268	1.52247
2014-12-12 18:00:00	469.09	462.248	-6.84127
2014-12-12 19:00:00	496.531	493.977	-2.55405
2014-12-12 20:00:00	506.803	505.402	-1.40062
2014-12-12 21:00:00	466.338	465.096	-1.24193
2014-12-12 22:00:00	412.785	410.333	-2.45247
2014-12-12 23:00:00	341.323	340.075	-1.24825
2014-12-13	264.991	264.223	-0.7675
2014-12-13 01:00:00	229.486	229.003	-0.482183
2014-12-13 02:00:00	220.741	220.164	-0.576767
2014-12-13 03:00:00	224.965	224.409	-0.555767
2014-12-13 04:00:00	228.882	228.313	-0.568967
2014-12-13 05:00:00	226.198	225.617	-0.581
2014-12-13 06:00:00	235.814	235.33	-0.484533
2014-12-13 07:00:00	272.143	276.087	3.94365
2014-12-13 08:00:00	277.557	324.77	47.2123
2014-12-13 09:00:00	236.606	359.278	122.672
2014-12-13 10:00:00	154.686	362.727	208.041
2014-12-13 11:00:00	-103.726	374.39	478.116
2014-12-13 12:00:00	-85.4661	362.042	447.508
2014-12-13 13:00:00	-56.946	366.382	423.328
2014-12-13 14:00:00	-127.128	340.877	468.005
2014-12-13 15:00:00	47.8042	356.73	308.926
2014-12-13 16:00:00	307.441	370.738	63.2978
2014-12-13 17:00:00	453.839	456.03	2.19108
2014-12-13 18:00:00	498.248	500.607	2.3594
2014-12-13 19:00:00	492.266	494.24	1.97438
2014-12-13 20:00:00	485.975	488.526	2.55037
2014-12-13 21:00:00	488.301	489.517	1.21593
2014-12-13 22:00:00	434.187	432.375	-1.81138
2014-12-13 23:00:00	342.582	339.486	-3.09545
2014-12-14	285.586	285.094	-0.49185
2014-12-14 01:00:00	239.682	238.15	-1.53193
2014-12-14 02:00:00	226.663	225.035	-1.62795
2014-12-14 03:00:00	228.502	227.537	-0.96525
2014-12-14 04:00:00	213.911	213.292	-0.61835
2014-12-14 05:00:00	207.545	206.793	-0.752317
2014-12-14 06:00:00	202.276	201.51	-0.76605
2014-12-14 07:00:00	252.377	251.649	-0.7279
2014-12-14 08:00:00	280.128	300.924	20.7955
2014-12-14 09:00:00	284.191	354.248	70.0568
2014-12-14 10:00:00	258.611	374.961	116.349
2014-12-14 11:00:00	187.974	417.175	229.202
2014-12-14 12:00:00	321.582	425.511	103.929
2014-12-14 13:00:00	340.67	431.081	90.4107
2014-12-14 14:00:00	304.365	419.14	114.774
2014-12-14 15:00:00	361.795	440.618	78.8231
2014-12-14 16:00:00	433.28	446.85	13.5704
2014-12-14 17:00:00	530.561	526.97	-3.59153
2014-12-14 18:00:00	586.386	583.687	-2.69865
2014-12-14 19:00:00	591.913	588.651	-3.26153
2014-12-14 20:00:00	578.28	576.411	-1.8689
2014-12-14 21:00:00	522.472	525.95	3.4775
2014-12-14 22:00:00	440.294	438.796	-1.4972
2014-12-14 23:00:00	356.5	354.122	-2.37772
2014-12-15	279.943	278.01	-1.93342
2014-12-15 01:00:00	233.739	232.257	-1.48203
2014-12-15 02:00:00	205.948	204.618	-1.32978
2014-12-15 03:00:00	212.045	210.847	-1.19728
2014-12-15 04:00:00	215.584	214.215	-1.36818
2014-12-15 05:00:00	216.714	215.652	-1.06252
2014-12-15 06:00:00	266.693	265.797	-0.896517
2014-12-15 07:00:00	338.5	339.091	0.59065
2014-12-15 08:00:00	183.101	296.653	113.552
2014-12-15 09:00:00	-9.51503	295.8	305.315
2014-12-15 10:00:00	-166.622	296.117	462.739
2014-12-15 11:00:00	-281.769	298.814	580.583
2014-12-15 12:00:00	-344.939	296.201	641.14
2014-12-15 13:00:00	-345.339	288.565	633.904
2014-12-15 14:00:00	-269.424	297.804	567.229
2014-12-15 15:00:00	-93.6127	328.738	422.351
2014-12-15 16:00:00	151.23	349.245	198.015
2014-12-15 17:00:00	409.73	425.993	16.2625
2014-12-15 18:00:00	550.796	549.859	-0.9367
2014-12-15 19:00:00	588.076	587.798	-0.277633
2014-12-15 20:00:00	550.13	549.57	-0.5602
2014-12-15 21:00:00	512.847	513.424	0.577283
2014-12-15 22:00:00	433.563	432.432	-1.13145
2014-12-15 23:00:00	323.76	322.219	-1.5411
2014-12-16	253.788	252.669	-1.11962
2014-12-16 01:00:00	221.533	220.744	-0.789467
2014-12-16 02:00:00	204.081	203.47	-0.610967
2014-12-16 03:00:00	213.065	212.374	-0.690817
2014-12-16 04:00:00	225.057	223.988	-1.06858
2014-12-16 05:00:00	243.869	243.147	-0.721867
2014-12-16 06:00:00	309.235	308.097	-1.13873
2014-12-16 07:00:00	354.7	367.81	13.1107
2014-12-16 08:00:00	176.451	321.792	145.34
2014-12-16 09:00:00	-11.334	306.639	317.973
2014-12-16 10:00:00	-169.439	307.638	477.077
2014-12-16 11:00:00	-303.532	289.574	593.106
2014-12-16 12:00:00	-326.957	306.03	632.987
2014-12-16 13:00:00	-310.468	306.037	616.505
2014-12-16 14:00:00	-264.154	282.936	547.09
2014-12-16 15:00:00	-127.028	276.178	403.206
2014-12-16 16:00:00	193.308	321.153	127.846
2014-12-16 17:00:00	427.546	425.203	-2.34368
2014-12-16 18:00:00	511.181	508.029	-3.15228
2014-12-16 19:00:00	513.551	513.61	0.0587833
2014-12-16 20:00:00	492.383	492.508	0.124933
2014-12-16 21:00:00	469.474	468.3	-1.17477
2014-12-16 22:00:00	421.057	416.322	-4.73583
2014-12-16 23:00:00	333.213	331.805	-1.4081
2014-12-17	252.757	251.84	-0.916733
2014-12-17 01:00:00	214.788	213.587	-1.20068
2014-12-17 02:00:00	221.996	220.949	-1.04613
2014-12-17 03:00:00	235.644	234.364	-1.27958
2014-12-17 04:00:00	243.74	242.715	-1.02437
2014-12-17 05:00:00	272.083	270.789	-1.29368
2014-12-17 06:00:00	335.089	334.246	-0.842883
2014-12-17 07:00:00	397.773	397.839	0.0662333
2014-12-17 08:00:00	352.04	359.797	7.75645
2014-12-17 09:00:00	296.485	330.444	33.9584
2014-12-17 10:00:00	268.09	331.364	63.2745
2014-12-17 11:00:00	300.488	343.541	43.0535
2014-12-17 12:00:00	325.39	358.687	33.2968
2014-12-17 13:00:00	335.998	344.775	8.7772
2014-12-17 14:00:00	293.186	354.837	61.6513
2014-12-17 15:00:00	335.038	371.061	36.0234
2014-12-17 16:00:00	401.71	405.989	4.27925
2014-12-17 17:00:00	490.259	488.931	-1.32835
2014-12-17 18:00:00	569.326	564.513	-4.81357
2014-12-17 19:00:00	575.887	576.937	1.0506
2014-12-17 20:00:00	557.987	557.364	-0.622767
2014-12-17 21:00:00	510.106	508.75	-1.35577
2014-12-17 22:00:00	445.179	445.407	0.227233
2014-12-17 23:00:00	364.894	363.753	-1.14093
2014-12-18	272.088	270.861	-1.2272
2014-12-18 01:00:00	240.609	239.676	-0.933833
2014-12-18 02:00:00	234.512	233.568	-0.943733
2014-12-18 03:00:00	240.712	240.141	-0.5709
2014-12-18 04:00:00	241.325	240.431	-0.894
2014-12-18 05:00:00	276.871	275.705	-1.16627
2014-12-18 06:00:00	347.177	346.217	-0.960767
2014-12-18 07:00:00	410.85	410.456	-0.393717
2014-12-18 08:00:00	319.201	357.148	37.9469
2014-12-18 09:00:00	276.207	342.075	65.868
2014-12-18 10:00:00	203.925	333.126	129.2
2014-12-18 11:00:00	129.97	336.358	206.387
2014-12-18 12:00:00	159.064	310.189	151.125
2014-12-18 13:00:00	145.079	276.872	131.793
2014-12-18 14:00:00	200.407	301.155	100.748
2014-12-18 15:00:00	309.9	344.451	34.5511
2014-12-18 16:00:00	349.063	366.964	17.9015
2014-12-18 17:00:00	476.475	475.907	-0.568017
2014-12-18 18:00:00	522.008	519.227	-2.78038
2014-12-18 19:00:00	538.885	541.706	2.82072
2014-12-18 20:00:00	505.875	508.9	3.02483
2014-12-18 21:00:00	472.761	474.074	1.31293
2014-12-18 22:00:00	423.833	422.877	-0.956067
2014-12-18 23:00:00	353.633	353.076	-0.557267
2014-12-19	291.314	290.818	-0.496133
2014-12-19 01:00:00	244.753	244.295	-0.458417
2014-12-19 02:00:00	234.337	233.864	-0.4731
2014-12-19 03:00:00	229.226	228.825	-0.401067
2014-12-19 04:00:00	241.588	240.955	-0.6334
2014-12-19 05:00:00	265.603	265.061	-0.542267
2014-12-19 06:00:00	313.199	312.683	-0.515983
2014-12-19 07:00:00	369.755	370.391	0.636267
2014-12-19 08:00:00	367.416	377.929	10.5124
2014-12-19 09:00:00	211.642	352.285	140.642
2014-12-19 10:00:00	124.573	343.515	218.941
2014-12-19 11:00:00	64.2947	346.129	281.834
2014-12-19 12:00:00	88.7655	336.992	248.226
2014-12-19 13:00:00	104.634	323.167	218.533
2014-12-19 14:00:00	212.61	335.703	123.093
2014-12-19 15:00:00	318.667	373.898	55.2308
2014-12-19 16:00:00	375.396	387.888	12.4913
2014-12-19 17:00:00	484.143	480.179	-3.96407
2014-12-19 18:00:00	515.554	513.36	-2.19377
2014-12-19 19:00:00	535.344	533.191	-2.15335
2014-12-19 20:00:00	527.519	526.033	-1.48643
2014-12-19 21:00:00	539.346	537.222	-2.12367
2014-12-19 22:00:00	479.812	477.457	-2.35538
2014-12-19 23:00:00	398.133	397.125	-1.0078
2014-12-20	322.663	324.083	1.42067
2014-12-20 01:00:00	258.453	259.052	0.599083
2014-12-20 02:00:00	237.992	236.811	-1.18097
2014-12-20 03:00:00	250.852	249.843	-1.00887
2014-12-20 04:00:00	261.337	260.293	-1.04473
2014-12-20 05:00:00	286.8	285.549	-1.25083
2014-12-20 06:00:00	307.851	307.653	-0.1982
2014-12-20 07:00:00	339.638	338.084	-1.55373
2014-12-20 08:00:00	353.245	361.379	8.13463
2014-12-20 09:00:00	368.522	401.713	33.1909
2014-12-20 10:00:00	333.252	404.427	71.175
2014-12-20 11:00:00	326.231	437.031	110.8
2014-12-20 12:00:00	292.612	433.007	140.396
2014-12-20 13:00:00	316.685	430.618	113.933
2014-12-20 14:00:00	282.455	399.956	117.501
2014-12-20 15:00:00	343.123	400.169	57.0463
2014-12-20 16:00:00	394.903	422.324	27.4211
2014-12-20 17:00:00	485.373	484.138	-1.23572
2014-12-20 18:00:00	534.228	534.774	0.545667
2014-12-20 19:00:00	533.422	533.569	0.1463
2014-12-20 20:00:00	518.71	519.417	0.707083
2014-12-20 21:00:00	499.789	500.431	0.64185
2014-12-20 22:00:00	439.224	437.88	-1.34327
2014-12-20 23:00:00	369.529	370.071	0.542383
2014-12-21	310.843	311.93	1.087
2014-12-21 01:00:00	261.958	262.847	0.889117
2014-12-21 02:00:00	247.503	248.202	0.69875
2014-12-21 03:00:00	256.694	257.208	0.514067
2014-12-21 04:00:00	246.6	247.303	0.702767
2014-12-21 05:00:00	263.949	263.931	-0.0179833
2014-12-21 06:00:00	249.271	248.955	-0.31635
2014-12-21 07:00:00	288.475	288.349	-0.126533
2014-12-21 08:00:00	333.135	347.481	14.3456
2014-12-21 09:00:00	343.082	387.145	44.063
2014-12-21 10:00:00	311.879	423.196	111.317
2014-12-21 11:00:00	320.011	453.044	133.033
2014-12-21 12:00:00	296.289	451.686	155.398
2014-12-21 13:00:00	312.766	445.497	132.732
2014-12-21 14:00:00	348.46	432.295	83.8357
2014-12-21 15:00:00	392.335	442.294	49.9591
2014-12-21 16:00:00	445.923	459.36	13.4367
2014-12-21 17:00:00	528.112	525.813	-2.29892
2014-12-21 18:00:00	533.12	537.285	4.1644
2014-12-21 19:00:00	552.757	557.149	4.39175
2014-12-21 20:00:00	530.9	531.436	0.53625
2014-12-21 21:00:00	503.84	504.156	0.31595
2014-12-21 22:00:00	451.052	450.11	-0.9423
2014-12-21 23:00:00	356.042	360.028	3.98583
2014-12-22	280.783	279.5	-1.28375
2014-12-22 01:00:00	243.595	242.283	-1.31172
2014-12-22 02:00:00	229.918	228.772	-1.14587
2014-12-22 03:00:00	227.687	227.087	-0.600533
2014-12-22 04:00:00	243.935	243.28	-0.655217
2014-12-22 05:00:00	241.412	240.604	-0.807933
2014-12-22 06:00:00	254.514	253.759	-0.755317
2014-12-22 07:00:00	293.989	298.03	4.0414
2014-12-22 08:00:00	173.46	328.918	155.458
2014-12-22 09:00:00	56.2563	331.018	274.761
2014-12-22 10:00:00	-60.0186	336.253	396.271
2014-12-22 11:00:00	-141.472	327.575	469.048
2014-12-22 12:00:00	-239.598	336.486	576.084
2014-12-22 13:00:00	63.3035	341.547	278.243
2014-12-22 14:00:00	172.547	322.715	150.169
2014-12-22 15:00:00	124.781	324.792	200.011
2014-12-22 16:00:00	305.12	344.277	39.1564
2014-12-22 17:00:00	444.093	442.659	-1.43378
2014-12-22 18:00:00	515.843	512.948	-2.89447
2014-12-22 19:00:00	510.667	509.361	-1.30657
2014-12-22 20:00:00	486.874	484.584	-2.28937
2014-12-22 21:00:00	483.375	480.975	-2.40077
2014-12-22 22:00:00	422.981	419.835	-3.14602
2014-12-22 23:00:00	340.393	336.606	-3.78737
2014-12-23	269.447	263.242	-6.20545
2014-12-23 01:00:00	230.969	227.139	-3.83023
2014-12-23 02:00:00	212.035	210.481	-1.55478
2014-12-23 03:00:00	232.799	231.401	-1.39797
2014-12-23 04:00:00	231.992	231.121	-0.871267
2014-12-23 05:00:00	243.396	242.449	-0.94705
2014-12-23 06:00:00	240.506	239.712	-0.79405
2014-12-23 07:00:00	314.68	314.979	0.299633
2014-12-23 08:00:00	293.925	350.583	56.6581
2014-12-23 09:00:00	125.75	352.53	226.78
2014-12-23 10:00:00	192.008	368.871	176.862
2014-12-23 11:00:00	271.719	382.605	110.886
2014-12-23 12:00:00	127.397	384.073	256.676
2014-12-23 13:00:00	35.842	391.247	355.405
2014-12-23 14:00:00	253.976	364.802	110.826
2014-12-23 15:00:00	247.724	376.516	128.792
2014-12-23 16:00:00	213.879	391.102	177.223
2014-12-23 17:00:00	468.572	479.142	10.5708
2014-12-23 18:00:00	543.024	543.73	0.706333
2014-12-23 19:00:00	579.626	584.533	4.90675
2014-12-23 20:00:00	555.637	558.588	2.95093
2014-12-23 21:00:00	516.272	513.257	-3.01448
2014-12-23 22:00:00	457.215	455.538	-1.67623
2014-12-23 23:00:00	391.643	391.428	-0.21535
2014-12-24	316.453	314.443	-2.00957
2014-12-24 01:00:00	277.513	276.679	-0.834
2014-12-24 02:00:00	283.988	281.898	-2.08977
2014-12-24 03:00:00	292.739	290.763	-1.97625
2014-12-24 04:00:00	301.882	299.305	-2.57767
2014-12-24 05:00:00	320.005	317.806	-2.1988
2014-12-24 06:00:00	336.454	334.344	-2.11017
2014-12-24 07:00:00	368.702	377.661	8.95922
2014-12-24 08:00:00	278.066	414.367	136.301
2014-12-24 09:00:00	124.718	448.176	323.458
2014-12-24 10:00:00	-57.2934	434.837	492.131
2014-12-24 11:00:00	-216.051	406.914	622.965
2014-12-24 12:00:00	-252.307	437.021	689.328
2014-12-24 13:00:00	-278.859	411.812	690.672
2014-12-24 14:00:00	-212.956	411.714	624.67
2014-12-24 15:00:00	-83.9565	386.785	470.741
2014-12-24 16:00:00	154.764	388.034	233.27
2014-12-24 17:00:00	424.306	447.751	23.4451
2014-12-24 18:00:00	484.624	483.357	-1.2669
2014-12-24 19:00:00	478.668	472.137	-6.53065
2014-12-24 20:00:00	512.186	508	-4.18523
2014-12-24 21:00:00	508.829	503.656	-5.1733
2014-12-24 22:00:00	476.834	470.977	-5.85633
2014-12-24 23:00:00	406.798	403.012	-3.78633
2014-12-25	359.619	355.884	-3.73438
2014-12-25 01:00:00	323.419	321.388	-2.03163
2014-12-25 02:00:00	311.422	308.88	-2.54252
2014-12-25 03:00:00	321.914	318.888	-3.02523
2014-12-25 04:00:00	321.769	319.295	-2.47355
2014-12-25 05:00:00	340.715	337.599	-3.11633
2014-12-25 06:00:00	377.013	374.272	-2.74107
2014-12-25 07:00:00	411.144	412.836	1.69177
2014-12-25 08:00:00	284.615	424.717	140.102
2014-12-25 09:00:00	101.435	432.77	331.335
2014-12-25 10:00:00	-56.903	436.764	493.667
2014-12-25 11:00:00	-181.094	445.818	626.911
2014-12-25 12:00:00	-277.074	413.321	690.395
2014-12-25 13:00:00	-298.89	393.311	692.201
2014-12-25 14:00:00	-260.665	372.513	633.178
2014-12-25 15:00:00	-104.006	375.934	479.939
2014-12-25 16:00:00	141.988	383.968	241.98
2014-12-25 17:00:00	389.911	414.814	24.903
2014-12-25 18:00:00	442.308	445.193	2.88587
2014-12-25 19:00:00	475.193	477.031	1.83767
2014-12-25 20:00:00	459.632	457.144	-2.48832
2014-12-25 21:00:00	442.75	435.404	-7.34618
2014-12-25 22:00:00	423.789	419.161	-4.62843
2014-12-25 23:00:00	339.22	335.754	-3.46558
2014-12-26	272.075	269.577	-2.498
2014-12-26 01:00:00	231.769	229.127	-2.64235
2014-12-26 02:00:00	213.531	211.109	-2.42223
2014-12-26 03:00:00	220.998	218.538	-2.4604
2014-12-26 04:00:00	225.078	222.964	-2.11403
2014-12-26 05:00:00	230.581	227.933	-2.64818
2014-12-26 06:00:00	235.434	233.262	-2.17167
2014-12-26 07:00:00	277.864	279.724	1.85905
2014-12-26 08:00:00	293.527	318.298	24.7712
2014-12-26 09:00:00	313.498	356.476	42.9779
2014-12-26 10:00:00	335.709	397.245	61.5368
2014-12-26 11:00:00	339.476	394.973	55.4972
2014-12-26 12:00:00	228.621	382.488	153.867
2014-12-26 13:00:00	144.99	359.276	214.286
2014-12-26 14:00:00	82.3625	324.052	241.689
2014-12-26 15:00:00	-95.4596	312.194	407.654
2014-12-26 16:00:00	108.644	314.234	205.59
2014-12-26 17:00:00	345.187	367.459	22.2722
2014-12-26 18:00:00	430.674	428.833	-1.84098
2014-12-26 19:00:00	447.681	448.26	0.579467
2014-12-26 20:00:00	442.216	443.857	1.64062
2014-12-26 21:00:00	413.733	412.754	-0.978867
2014-12-26 22:00:00	401.566	398.272	-3.29357
2014-12-26 23:00:00	340.351	336.867	-3.48375
2014-12-27	268.125	265.306	-2.81862
2014-12-27 01:00:00	228.335	225.997	-2.33828
2014-12-27 02:00:00	203.674	201.43	-2.24412
2014-12-27 03:00:00	209.548	207.947	-1.60072
2014-12-27 04:00:00	208.317	206.635	-1.68205
2014-12-27 05:00:00	210.98	209.443	-1.5373
2014-12-27 06:00:00	202.423	201.072	-1.35058
2014-12-27 07:00:00	236.787	234.454	-2.33322
2014-12-27 08:00:00	302.03	301.834	-0.195517
2014-12-27 09:00:00	333.984	354.849	20.8655
2014-12-27 10:00:00	368.641	387.731	19.0898
2014-12-27 11:00:00	392.976	417.776	24.8005
2014-12-27 12:00:00	352.947	402.933	49.9862
2014-12-27 13:00:00	310.515	378.286	67.7711
2014-12-27 14:00:00	302.505	371.924	69.419
2014-12-27 15:00:00	377.502	409.023	31.5211
2014-12-27 16:00:00	398.309	412.178	13.8688
2014-12-27 17:00:00	459.464	457.205	-2.25818
2014-12-27 18:00:00	483.412	481.175	-2.23677
2014-12-27 19:00:00	499.687	496.497	-3.18915
2014-12-27 20:00:00	517.674	513.214	-4.45928
2014-12-27 21:00:00	487.952	481.766	-6.18538
2014-12-27 22:00:00	431.551	428.912	-2.63822
2014-12-27 23:00:00	359.744	362.864	3.11972
2014-12-28	311.407	309.65	-1.75702
2014-12-28 01:00:00	283.894	281.563	-2.33022
2014-12-28 02:00:00	269.163	267.287	-1.87525
2014-12-28 03:00:00	273.234	271.368	-1.8666
2014-12-28 04:00:00	301.129	298.823	-2.306
2014-12-28 05:00:00	308.312	305.941	-2.37093
2014-12-28 06:00:00	338.862	336.353	-2.50855
2014-12-28 07:00:00	378.101	373.741	-4.36032
2014-12-28 08:00:00	381.228	382.637	1.40947
2014-12-28 09:00:00	428.149	444.552	16.403
2014-12-28 10:00:00	424.084	483.852	59.7671
2014-12-28 11:00:00	265.793	446.042	180.249
2014-12-28 12:00:00	259.8	451.419	191.619
2014-12-28 13:00:00	270.057	439.729	169.671
2014-12-28 14:00:00	240.422	419.178	178.756
2014-12-28 15:00:00	291.862	434.231	142.369
2014-12-28 16:00:00	301.555	489.113	187.558
2014-12-28 17:00:00	489.655	507.283	17.6286
2014-12-28 18:00:00	582.998	576.57	-6.42833
2014-12-28 19:00:00	591.56	584.368	-7.19155
2014-12-28 20:00:00	596.288	591.438	-4.84998
2014-12-28 21:00:00	558.501	550.414	-8.0865
2014-12-28 22:00:00	488.87	483.338	-5.53235
2014-12-28 23:00:00	428.623	428.581	-0.0415333
2014-12-29	379.778	374.079	-5.69867
2014-12-29 01:00:00	360.834	356.068	-4.76598
2014-12-29 02:00:00	349.558	344.547	-5.01092
2014-12-29 03:00:00	358.881	353.686	-5.19493
2014-12-29 04:00:00	372.494	367.526	-4.96865
2014-12-29 05:00:00	394.208	387.471	-6.73645
2014-12-29 06:00:00	451.65	444.823	-6.82692
2014-12-29 07:00:00	449.874	455.965	6.09075
2014-12-29 08:00:00	314.642	448.79	134.147
2014-12-29 09:00:00	96.5383	404.4	307.862
2014-12-29 10:00:00	-76.5001	385.16	461.66
2014-12-29 11:00:00	-197.758	384.895	582.653
2014-12-29 12:00:00	-226.585	399.393	625.978
2014-12-29 13:00:00	-286.327	357.395	643.723
2014-12-29 14:00:00	-153.453	334.68	488.132
2014-12-29 15:00:00	28.6552	326.807	298.152
2014-12-29 16:00:00	134.226	323.543	189.317
2014-12-29 17:00:00	410.744	421.626	10.8826
2014-12-29 18:00:00	512.677	517.047	4.37037
2014-12-29 19:00:00	503.581	509.377	5.79578
2014-12-29 20:00:00	507.356	504.393	-2.96322
2014-12-29 21:00:00	486.183	484.067	-2.11613
2014-12-29 22:00:00	397.546	394.156	-3.38945
2014-12-29 23:00:00	338.439	335.765	-2.6741
2014-12-30	282.002	279.615	-2.3872
2014-12-30 01:00:00	266.76	265.15	-1.60973
2014-12-30 02:00:00	257.136	255.263	-1.87312
2014-12-30 03:00:00	260.127	258.479	-1.64795
2014-12-30 04:00:00	261.342	259.242	-2.10003
2014-12-30 05:00:00	268.964	267.331	-1.63343
2014-12-30 06:00:00	322.084	319.989	-2.09535
2014-12-30 07:00:00	367.041	364.485	-2.55575
2014-12-30 08:00:00	358.515	367.27	8.75477
2014-12-30 09:00:00	353.407	386.791	33.3837
2014-12-30 10:00:00	351.948	422.329	70.3802
2014-12-30 11:00:00	357.74	427.828	70.0872
2014-12-30 12:00:00	360.055	423.835	63.7799
2014-12-30 13:00:00	372.075	431.122	59.047
2014-12-30 14:00:00	370.451	421.796	51.345
2014-12-30 15:00:00	406.059	421.053	14.994
2014-12-30 16:00:00	450.62	452.445	1.8247
2014-12-30 17:00:00	531.982	529.179	-2.80367
2014-12-30 18:00:00	585.687	583.441	-2.24672
2014-12-30 19:00:00	605.693	599.274	-6.41908
2014-12-30 20:00:00	591.282	585.743	-5.53845
2014-12-30 21:00:00	571.7	565.059	-6.64145
2014-12-30 22:00:00	498.083	490.049	-8.03368
2014-12-30 23:00:00	375.193	370.156	-5.03778
2014-12-31	324.053	319.444	-4.60902
2014-12-31 01:00:00	297.91	294.82	-3.09012
2014-12-31 02:00:00	284.838	281.465	-3.3729
2014-12-31 03:00:00	293.548	290.124	-3.42378
2014-12-31 04:00:00	299.294	295.495	-3.79895
2014-12-31 05:00:00	316.707	312.914	-3.79287
2014-12-31 06:00:00	369.418	365.143	-4.2752
2014-12-31 07:00:00	422.319	418.852	-3.46647
2014-12-31 08:00:00	399.496	421.641	22.1446
2014-12-31 09:00:00	395.89	457.706	61.8158
2014-12-31 10:00:00	377.385	467.451	90.0662
2014-12-31 11:00:00	342.468	482.415	139.947
2014-12-31 12:00:00	291.533	445.789	154.255
2014-12-31 13:00:00	308.67	445.81	137.14
2014-12-31 14:00:00	309.389	458.69	149.301
2014-12-31 15:00:00	380.09	450.392	70.3016
2014-12-31 16:00:00	496.098	515.879	19.7801
2014-12-31 17:00:00	597.348	595.861	-1.48655
2014-12-31 18:00:00	632.492	628.256	-4.23593
2014-12-31 19:00:00	633.825	627.36	-6.46512
2014-12-31 20:00:00	560.636	556.267	-4.3693
2014-12-31 21:00:00	533.568	529.495	-4.07313
2014-12-31 22:00:00	485.203	479.07	-6.13298
2014-12-31 23:00:00	440.531	433.871	-6.6594
2015-01-01	394.61	387.672	-6.93805
2015-01-01 01:00:00	369.538	366.709	-2.8292
2015-01-01 02:00:00	359.156	357.708	-1.4487
2015-01-01 03:00:00	349.227	347.812	-1.41545
2015-01-01 04:00:00	352.737	351.43	-1.30747
2015-01-01 05:00:00	368.369	366.563	-1.80572
2015-01-01 06:00:00	402.277	400.564	-1.71335
2015-01-01 07:00:00	422.884	420.696	-2.1882
2015-01-01 08:00:00	396.093	401.247	5.15353
2015-01-01 09:00:00	464.732	487.867	23.135
2015-01-01 10:00:00	466.277	508.388	42.1115
2015-01-01 11:00:00	490.286	525.235	34.9483
2015-01-01 12:00:00	520.45	554.538	34.0877
2015-01-01 13:00:00	522.383	555.43	33.0462
2015-01-01 14:00:00	493.095	530.985	37.8898
2015-01-01 15:00:00	497.808	524.105	26.2973
2015-01-01 16:00:00	528.633	530.395	1.762
2015-01-01 17:00:00	567.447	560.995	-6.45187
2015-01-01 18:00:00	617.278	610.043	-7.2347
2015-01-01 19:00:00	570.877	564.093	-6.78403
2015-01-01 20:00:00	557.371	551.529	-5.8423
2015-01-01 21:00:00	547.74	543.006	-4.73322
2015-01-01 22:00:00	474.746	469.61	-5.13542
2015-01-01 23:00:00	424.723	420.877	-3.8454
2015-01-02	358.472	354.354	-4.11815
2015-01-02 01:00:00	309.098	307.909	-1.18877
2015-01-02 02:00:00	302.09	300.636	-1.45363
2015-01-02 03:00:00	299.675	297.642	-2.03293
2015-01-02 04:00:00	324.235	322.376	-1.85903
2015-01-02 05:00:00	329.98	327.046	-2.9348
2015-01-02 06:00:00	368.524	365.744	-2.7803
2015-01-02 07:00:00	402.393	398.616	-3.77717
2015-01-02 08:00:00	383.963	395.855	11.8927
2015-01-02 09:00:00	375.906	410.027	34.1208
2015-01-02 10:00:00	384.472	451.452	66.9805
2015-01-02 11:00:00	402.815	476.586	73.7715
2015-01-02 12:00:00	409.392	493.041	83.6492
2015-01-02 13:00:00	464.687	501.998	37.3111
2015-01-02 14:00:00	457.989	483.4	25.4111
2015-01-02 15:00:00	459.893	471.232	11.3391
2015-01-02 16:00:00	515.83	514.264	-1.5659
2015-01-02 17:00:00	602.322	593.713	-8.60857
2015-01-02 18:00:00	617.739	610.913	-6.82677
2015-01-02 19:00:00	606.741	596.518	-10.2231
2015-01-02 20:00:00	559.561	548.905	-10.6567
2015-01-02 21:00:00	537.296	526.364	-10.9327
2015-01-02 22:00:00	458.494	448.216	-10.2778
2015-01-02 23:00:00	396.475	388.522	-7.95238
2015-01-03	340.869	332.872	-7.99623
2015-01-03 01:00:00	290.253	283.734	-6.51893
2015-01-03 02:00:00	288.118	280.555	-7.5629
2015-01-03 03:00:00	291.138	286.95	-4.18765
2015-01-03 04:00:00	299.315	295.136	-4.17893
2015-01-03 05:00:00	314.159	309.78	-4.37955
2015-01-03 06:00:00	333.562	329.055	-4.50667
2015-01-03 07:00:00	362.693	360.433	-2.26017
2015-01-03 08:00:00	283.141	396.705	113.564
2015-01-03 09:00:00	204.821	420.38	215.559
2015-01-03 10:00:00	221.976	424.459	202.482
2015-01-03 11:00:00	-0.56975	466.246	466.816
2015-01-03 12:00:00	-235.034	421.286	656.32
2015-01-03 13:00:00	-270.573	393.133	663.706
2015-01-03 14:00:00	-254.6	355.229	609.829
2015-01-03 15:00:00	-136.631	332.192	468.823
2015-01-03 16:00:00	101.32	344.224	242.904
2015-01-03 17:00:00	355.874	384.795	28.921
2015-01-03 18:00:00	466.268	462.403	-3.86473
2015-01-03 19:00:00	494.629	488.861	-5.76815
2015-01-03 20:00:00	485.633	479.968	-5.66478
2015-01-03 21:00:00	475.598	472.222	-3.37565
2015-01-03 22:00:00	442.424	438.359	-4.06555
2015-01-03 23:00:00	365.323	360.758	-4.56535
2015-01-04	316.97	313.035	-3.93535
2015-01-04 01:00:00	291.475	287.4	-4.07485
2015-01-04 02:00:00	283.664	280.353	-3.31065
2015-01-04 03:00:00	287.788	284.305	-3.48257
2015-01-04 04:00:00	296.15	292.748	-3.40122
2015-01-04 05:00:00	312.594	307.561	-5.0328
2015-01-04 06:00:00	317.713	312.843	-4.86912
2015-01-04 07:00:00	337.018	338.881	1.86362
2015-01-04 08:00:00	269.905	392.911	123.006
2015-01-04 09:00:00	92.6012	403.906	311.305
2015-01-04 10:00:00	-57.0145	423.353	480.368
2015-01-04 11:00:00	-198.791	416.86	615.65
2015-01-04 12:00:00	-289.418	405.621	695.039
2015-01-04 13:00:00	-294.534	415.992	710.526
2015-01-04 14:00:00	-232.873	412.129	645.002
2015-01-04 15:00:00	30.0985	460.702	430.604
2015-01-04 16:00:00	247.419	459.114	211.694
2015-01-04 17:00:00	516.562	531.995	15.4329
2015-01-04 18:00:00	619.009	612.873	-6.13587
2015-01-04 19:00:00	607.263	600.166	-7.09645
2015-01-04 20:00:00	600.021	592.452	-7.56878
2015-01-04 21:00:00	555.905	549.527	-6.37785
2015-01-04 22:00:00	497.735	494.336	-3.39882
2015-01-04 23:00:00	436.083	430.519	-5.56448
2015-01-05	385.619	381.585	-4.03453
2015-01-05 01:00:00	358.287	357.382	-0.904217
2015-01-05 02:00:00	371.877	370.409	-1.46877
2015-01-05 03:00:00	370.448	368.693	-1.75532
2015-01-05 04:00:00	402.354	399.528	-2.82658
2015-01-05 05:00:00	411.074	406.117	-4.95682
2015-01-05 06:00:00	504.033	498.489	-5.54385
2015-01-05 07:00:00	558.121	555.806	-2.31533
2015-01-05 08:00:00	402.042	491.848	89.8058
2015-01-05 09:00:00	174.869	445.318	270.449
2015-01-05 10:00:00	-67.9375	407.616	475.553
2015-01-05 11:00:00	-203.281	389.707	592.989
2015-01-05 12:00:00	-267.855	390.249	658.104
2015-01-05 13:00:00	-299.949	373.932	673.881
2015-01-05 14:00:00	-280.666	338.304	618.97
2015-01-05 15:00:00	-174.669	314.637	489.305
2015-01-05 16:00:00	91.9638	348.176	256.212
2015-01-05 17:00:00	421.69	445.291	23.601
2015-01-05 18:00:00	576.439	568.752	-7.68687
2015-01-05 19:00:00	618.857	607.972	-10.8851
2015-01-05 20:00:00	603.452	593.679	-9.77325
2015-01-05 21:00:00	546.142	537.919	-8.2231
2015-01-05 22:00:00	460.656	456.011	-4.64432
2015-01-05 23:00:00	372.27	366.035	-6.23505
2015-01-06	326.887	323.316	-3.57147
2015-01-06 01:00:00	308.983	305.743	-3.24005
2015-01-06 02:00:00	301.966	298.122	-3.84423
2015-01-06 03:00:00	324.889	321.303	-3.58588
2015-01-06 04:00:00	345.46	341.415	-4.04525
2015-01-06 05:00:00	344.392	340.349	-4.04258
2015-01-06 06:00:00	446.348	440.918	-5.42962
2015-01-06 07:00:00	499.385	495.225	-4.16005
2015-01-06 08:00:00	315.315	414.915	99.5998
2015-01-06 09:00:00	83.0793	356.893	273.814
2015-01-06 10:00:00	-95.887	329.824	425.711
2015-01-06 11:00:00	-241.275	311.309	552.584
2015-01-06 12:00:00	-315.881	302.59	618.47
2015-01-06 13:00:00	-339.797	287.138	626.935
2015-01-06 14:00:00	-316.224	279.63	595.854
2015-01-06 15:00:00	-158.695	285.064	443.758
2015-01-06 16:00:00	73.4728	312.01	238.537
2015-01-06 17:00:00	350.284	373.132	22.8477
2015-01-06 18:00:00	480.142	475.966	-4.17632
2015-01-06 19:00:00	509.034	504.476	-4.55798
2015-01-06 20:00:00	480.666	473.061	-7.60502
2015-01-06 21:00:00	437.949	430.232	-7.7173
2015-01-06 22:00:00	383.366	377.76	-5.60617
2015-01-06 23:00:00	310.739	307.384	-3.35485
2015-01-07	253.388	249.475	-3.9131
2015-01-07 01:00:00	237.582	235.54	-2.04225
2015-01-07 02:00:00	233.353	230.838	-2.51522
2015-01-07 03:00:00	244.977	242.677	-2.30022
2015-01-07 04:00:00	275.944	273.447	-2.49663
2015-01-07 05:00:00	292.051	288.551	-3.50017
2015-01-07 06:00:00	359.12	355.335	-3.78478
2015-01-07 07:00:00	434.799	433.344	-1.45453
2015-01-07 08:00:00	332.187	375.094	42.9067
2015-01-07 09:00:00	200.458	325.008	124.55
2015-01-07 10:00:00	136.007	335.695	199.688
2015-01-07 11:00:00	56.2224	313.557	257.334
2015-01-07 12:00:00	-65.6403	313.324	378.964
2015-01-07 13:00:00	-285.84	298.536	584.376
2015-01-07 14:00:00	-324.645	294.581	619.226
2015-01-07 15:00:00	-154.337	290.651	444.988
2015-01-07 16:00:00	143.774	343.63	199.857
2015-01-07 17:00:00	481.199	481.911	0.7117
2015-01-07 18:00:00	615.14	608.419	-6.72127
2015-01-07 19:00:00	665.55	654.47	-11.0799
2015-01-07 20:00:00	645.648	637.276	-8.37195
2015-01-07 21:00:00	616.014	607.613	-8.40057
2015-01-07 22:00:00	517.928	512.239	-5.68872
2015-01-07 23:00:00	441.836	437.29	-4.54652
2015-01-08	404.742	403.417	-1.32542
2015-01-08 01:00:00	406.04	404.379	-1.66102
2015-01-08 02:00:00	409.062	407.088	-1.97385
2015-01-08 03:00:00	421.321	417.765	-3.556
2015-01-08 04:00:00	441.749	436.19	-5.5591
2015-01-08 05:00:00	461.876	456.547	-5.32942
2015-01-08 06:00:00	553.359	547.888	-5.47107
2015-01-08 07:00:00	613.284	615.28	1.99652
2015-01-08 08:00:00	452.107	557.007	104.9
2015-01-08 09:00:00	361.357	502.563	141.205
2015-01-08 10:00:00	311.429	465.787	154.358
2015-01-08 11:00:00	321.515	473.065	151.55
2015-01-08 12:00:00	380.194	471.422	91.2275
2015-01-08 13:00:00	336.63	475.952	139.322
2015-01-08 14:00:00	324.91	454.795	129.885
2015-01-08 15:00:00	318.269	438.086	119.818
2015-01-08 16:00:00	413.328	460.598	47.2699
2015-01-08 17:00:00	595.292	596.467	1.17555
2015-01-08 18:00:00	703.648	697.973	-5.67535
2015-01-08 19:00:00	700.525	688.724	-11.8013
2015-01-08 20:00:00	682.027	673.289	-8.73775
2015-01-08 21:00:00	609.061	600.144	-8.91643
2015-01-08 22:00:00	533.007	528.193	-4.814
2015-01-08 23:00:00	446.518	440.124	-6.39478
2015-01-09	397.901	399.322	1.42088
2015-01-09 01:00:00	355.181	353.799	-1.38202
2015-01-09 02:00:00	327.25	324.468	-2.78145
2015-01-09 03:00:00	361.338	358.587	-2.75063
2015-01-09 04:00:00	361.663	357.795	-3.86788
2015-01-09 05:00:00	357.692	353.411	-4.28157
2015-01-09 06:00:00	463.652	457.878	-5.77423
2015-01-09 07:00:00	541.678	536.562	-5.1163
2015-01-09 08:00:00	463.162	469.559	6.39763
2015-01-09 09:00:00	412.742	444.216	31.4738
2015-01-09 10:00:00	363.439	441.586	78.1466
2015-01-09 11:00:00	370.821	451.845	81.0234
2015-01-09 12:00:00	305.442	437.425	131.983
2015-01-09 13:00:00	340.374	447.705	107.332
2015-01-09 14:00:00	378.513	455.035	76.5213
2015-01-09 15:00:00	387.896	462.4	74.5039
2015-01-09 16:00:00	442.307	480.393	38.086
2015-01-09 17:00:00	589.011	581.071	-7.93975
2015-01-09 18:00:00	662.434	651.372	-11.0623
2015-01-09 19:00:00	659.411	645.934	-13.4766
2015-01-09 20:00:00	639.791	628.003	-11.7881
2015-01-09 21:00:00	575.686	564.195	-11.4905
2015-01-09 22:00:00	510.471	506.2	-4.27088
2015-01-09 23:00:00	445.397	439.215	-6.18167
2015-01-10	376.549	370.167	-6.3829
2015-01-10 01:00:00	347.456	345.669	-1.78707
2015-01-10 02:00:00	357.835	355.348	-2.48782
2015-01-10 03:00:00	376.751	373.654	-3.09735
2015-01-10 04:00:00	394.228	390.681	-3.54652
2015-01-10 05:00:00	395.088	389.583	-5.50453
2015-01-10 06:00:00	443.499	436.826	-6.67252
2015-01-10 07:00:00	465.682	459.059	-6.62257
2015-01-10 08:00:00	501.609	504.316	2.7066
2015-01-10 09:00:00	503.598	530.641	27.0425
2015-01-10 10:00:00	479.965	575.326	95.3612
2015-01-10 11:00:00	502.043	590.837	88.7946
2015-01-10 12:00:00	488.11	601.335	113.225
2015-01-10 13:00:00	500.308	599.529	99.2217
2015-01-10 14:00:00	481.141	576.991	95.8497
2015-01-10 15:00:00	500.251	546.508	46.257
2015-01-10 16:00:00	562.065	571.349	9.28408
2015-01-10 17:00:00	603.605	597.249	-6.35617
2015-01-10 18:00:00	644.433	644.863	0.430683
2015-01-10 19:00:00	643.869	632.856	-11.0133
2015-01-10 20:00:00	588.59	579.351	-9.23807
2015-01-10 21:00:00	579.429	570.036	-9.39242
2015-01-10 22:00:00	520.718	510.725	-9.99358
2015-01-10 23:00:00	447.295	440.367	-6.9284
2015-01-11	405.44	398.093	-7.34712
2015-01-11 01:00:00	386.895	385.192	-1.70293
2015-01-11 02:00:00	363.846	361.278	-2.56883
2015-01-11 03:00:00	367.417	364.477	-2.93967
2015-01-11 04:00:00	346.932	343.167	-3.76508
2015-01-11 05:00:00	363.594	357.767	-5.82662
2015-01-11 06:00:00	404.537	399.202	-5.33487
2015-01-11 07:00:00	440.783	434.249	-6.53458
2015-01-11 08:00:00	438.807	471.304	32.4967
2015-01-11 09:00:00	376.109	485.356	109.247
2015-01-11 10:00:00	360.621	495.595	134.973
2015-01-11 11:00:00	321.898	489.218	167.32
2015-01-11 12:00:00	223.632	494.229	270.597
2015-01-11 13:00:00	135.329	470.957	335.629
2015-01-11 14:00:00	199.837	429.337	229.5
2015-01-11 15:00:00	326.699	449.605	122.906
2015-01-11 16:00:00	396.094	451.151	55.057
2015-01-11 17:00:00	501.983	505.745	3.76252
2015-01-11 18:00:00	596.226	590.66	-5.5665
2015-01-11 19:00:00	560.693	552.282	-8.41095
2015-01-11 20:00:00	541.414	532.261	-9.15307
2015-01-11 21:00:00	480.949	474.319	-6.63002
2015-01-11 22:00:00	398.719	395.031	-3.68823
2015-01-11 23:00:00	311.49	307.286	-4.20368
2015-01-12	264.102	262.187	-1.91437
2015-01-12 01:00:00	248.983	247.231	-1.7529
2015-01-12 02:00:00	240.365	238.082	-2.28275
2015-01-12 03:00:00	256.121	253.372	-2.74925
2015-01-12 04:00:00	262.318	259.638	-2.67987
2015-01-12 05:00:00	297.712	293.056	-4.65673
2015-01-12 06:00:00	398.521	393.738	-4.78253
2015-01-12 07:00:00	454.827	449.608	-5.21962
2015-01-12 08:00:00	386.738	397.354	10.616
2015-01-12 09:00:00	362.919	383.161	20.2415
2015-01-12 10:00:00	322.802	374.714	51.9124
2015-01-12 11:00:00	337.944	389.574	51.6303
2015-01-12 12:00:00	342.937	395.302	52.3642
2015-01-12 13:00:00	329.708	379.138	49.4306
2015-01-12 14:00:00	357.984	391.503	33.5192
2015-01-12 15:00:00	370.572	396.354	25.7824
2015-01-12 16:00:00	416.839	427.863	11.0239
2015-01-12 17:00:00	525.159	521.39	-3.7685
2015-01-12 18:00:00	617.412	612.883	-4.52842
2015-01-12 19:00:00	611.059	600.699	-10.3604
2015-01-12 20:00:00	578.916	564.385	-14.5316
2015-01-12 21:00:00	546.187	538.207	-7.97978
2015-01-12 22:00:00	467.103	461.954	-5.1484
2015-01-12 23:00:00	376.698	369.424	-7.27405
2015-01-13	329.906	324.999	-4.90715
2015-01-13 01:00:00	285.96	284.509	-1.451
2015-01-13 02:00:00	292.606	290.475	-2.1311
2015-01-13 03:00:00	320.995	318.932	-2.06277
2015-01-13 04:00:00	351.265	348.476	-2.78893
2015-01-13 05:00:00	362.527	358.552	-3.97505
2015-01-13 06:00:00	463.78	459.903	-3.87672
2015-01-13 07:00:00	538.927	530.692	-8.23495
2015-01-13 08:00:00	431.06	441.016	9.95575
2015-01-13 09:00:00	358.101	401.685	43.584
2015-01-13 10:00:00	318.336	382.823	64.4878
2015-01-13 11:00:00	313.775	400.371	86.5952
2015-01-13 12:00:00	258.477	376.993	118.516
2015-01-13 13:00:00	259.098	373.707	114.61
2015-01-13 14:00:00	262.107	375.675	113.568
2015-01-13 15:00:00	262.295	365.337	103.042
2015-01-13 16:00:00	379.996	425.923	45.9275
2015-01-13 17:00:00	490.437	490.639	0.201817
2015-01-13 18:00:00	603.911	597.534	-6.3767
2015-01-13 19:00:00	631.236	621.537	-9.6986
2015-01-13 20:00:00	609.483	598.046	-11.4372
2015-01-13 21:00:00	570.787	562.402	-8.38552
2015-01-13 22:00:00	476.266	469.098	-7.16813
2015-01-13 23:00:00	374.836	368.508	-6.32858
2015-01-14	341.555	334.288	-7.26667
2015-01-14 01:00:00	311.288	308.705	-2.58363
2015-01-14 02:00:00	316.127	312.9	-3.22757
2015-01-14 03:00:00	323.651	320.397	-3.25458
2015-01-14 04:00:00	336.529	332.448	-4.08143
2015-01-14 05:00:00	336.587	332.315	-4.27258
2015-01-14 06:00:00	451.304	446.01	-5.29427
2015-01-14 07:00:00	501.479	496.8	-4.67945
2015-01-14 08:00:00	420.585	420.184	-0.40075
2015-01-14 09:00:00	400.001	414.98	14.979
2015-01-14 10:00:00	324.471	377.421	52.9496
2015-01-14 11:00:00	290.308	371.74	81.4319
2015-01-14 12:00:00	311.816	386.457	74.641
2015-01-14 13:00:00	338.771	396.382	57.6117
2015-01-14 14:00:00	328.395	388.811	60.4158
2015-01-14 15:00:00	369.203	402.793	33.5902
2015-01-14 16:00:00	442.14	437.693	-4.44688
2015-01-14 17:00:00	541.244	531.571	-9.67325
2015-01-14 18:00:00	595.846	588.369	-7.47713
2015-01-14 19:00:00	603.575	590.702	-12.8731
2015-01-14 20:00:00	583.758	571.682	-12.0763
2015-01-14 21:00:00	543.628	535.881	-7.74703
2015-01-14 22:00:00	461.166	459.337	-1.82905
2015-01-14 23:00:00	387.429	382.156	-5.2729
2015-01-15	336.41	325.257	-11.1527
2015-01-15 01:00:00	300.923	293.709	-7.2136
2015-01-15 02:00:00	302.635	296.345	-6.29027
2015-01-15 03:00:00	305.378	299.026	-6.35178
2015-01-15 04:00:00	322.082	314.434	-7.64835
2015-01-15 05:00:00	357.125	346.045	-11.0796
2015-01-15 06:00:00	428.267	417.14	-11.1265
2015-01-15 07:00:00	490.377	478.163	-12.2142
2015-01-15 08:00:00	366.509	402.011	35.5014
2015-01-15 09:00:00	121.376	357.823	236.447
2015-01-15 10:00:00	-134.862	331.016	465.878
2015-01-15 11:00:00	-266.021	296.926	562.946
2015-01-15 12:00:00	-356.991	308.864	665.855
2015-01-15 13:00:00	-375.337	304.113	679.451
2015-01-15 14:00:00	-351.279	282.893	634.172
2015-01-15 15:00:00	-175.634	284.01	459.644
2015-01-15 16:00:00	130.353	298.705	168.352
2015-01-15 17:00:00	320.874	349.963	29.0884
2015-01-15 18:00:00	477.83	465.708	-12.1219
2015-01-15 19:00:00	517.836	496.939	-20.8968
2015-01-15 20:00:00	511.113	497.292	-13.8207
2015-01-15 21:00:00	479.775	466.038	-13.7371
2015-01-15 22:00:00	424.228	410.751	-13.477
2015-01-15 23:00:00	346.593	334.158	-12.4353
2015-01-16	288.779	281.894	-6.88467
2015-01-16 01:00:00	276.62	271.241	-5.37855
2015-01-16 02:00:00	300.892	296.553	-4.33922
2015-01-16 03:00:00	328.498	323.173	-5.32512
2015-01-16 04:00:00	328.441	322.257	-6.18365
2015-01-16 05:00:00	358.238	348.335	-9.90263
2015-01-16 06:00:00	447.832	438.488	-9.3441
2015-01-16 07:00:00	482.034	486.458	4.42433
2015-01-16 08:00:00	279.402	421.155	141.754
2015-01-16 09:00:00	52.0022	323.391	271.389
2015-01-16 10:00:00	7.6915	338.89	331.198
2015-01-16 11:00:00	-216.736	326.654	543.39
2015-01-16 12:00:00	-305.876	319.175	625.05
2015-01-16 13:00:00	-334.261	291.793	626.055
2015-01-16 14:00:00	-222.859	289.19	512.05
2015-01-16 15:00:00	-164.892	281.357	446.249
2015-01-16 16:00:00	36.9156	291.593	254.677
2015-01-16 17:00:00	301.509	335.222	33.7125
2015-01-16 18:00:00	432.851	422.741	-10.1105
2015-01-16 19:00:00	442.069	427.233	-14.8359
2015-01-16 20:00:00	438.068	422.971	-15.0968
2015-01-16 21:00:00	424.079	409.519	-14.5603
2015-01-16 22:00:00	401.757	390.232	-11.5247
2015-01-16 23:00:00	356.755	346.954	-9.80078
2015-01-17	299.561	290.326	-9.2346
2015-01-17 01:00:00	253.386	247.355	-6.03125
2015-01-17 02:00:00	242.825	237.979	-4.84545
2015-01-17 03:00:00	265.402	259.54	-5.86247
2015-01-17 04:00:00	272.148	264.918	-7.22948
2015-01-17 05:00:00	291.179	279.271	-11.9081
2015-01-17 06:00:00	329.334	320.433	-8.90065
2015-01-17 07:00:00	348.056	355.519	7.46313
2015-01-17 08:00:00	284.403	366.918	82.5148
2015-01-17 09:00:00	173.96	395.378	221.418
2015-01-17 10:00:00	-56.7749	382.369	439.144
2015-01-17 11:00:00	-259.71	361.191	620.901
2015-01-17 12:00:00	-236.418	336.883	573.301
2015-01-17 13:00:00	-25.1346	323.686	348.821
2015-01-17 14:00:00	67.3536	322.189	254.836
2015-01-17 15:00:00	187.794	347.32	159.527
2015-01-17 16:00:00	232.096	346.583	114.487
2015-01-17 17:00:00	362.489	372.561	10.0719
2015-01-17 18:00:00	439.812	430.24	-9.57148
2015-01-17 19:00:00	416.657	402.715	-13.9413
2015-01-17 20:00:00	407.022	396.774	-10.2487
2015-01-17 21:00:00	391.791	379.876	-11.9149
2015-01-17 22:00:00	362.058	348.449	-13.6094
2015-01-17 23:00:00	300.337	290.908	-9.42977
2015-01-18	243.165	235.271	-7.8938
2015-01-18 01:00:00	221.858	216.892	-4.96548
2015-01-18 02:00:00	229.104	225.156	-3.94798
2015-01-18 03:00:00	238.427	234.131	-4.29672
2015-01-18 04:00:00	251.191	246.471	-4.71997
2015-01-18 05:00:00	268.19	257.226	-10.9639
2015-01-18 06:00:00	279.984	272.217	-7.76652
2015-01-18 07:00:00	330.757	326.08	-4.6772
2015-01-18 08:00:00	248.104	362.472	114.368
2015-01-18 09:00:00	75.0194	381.938	306.918
2015-01-18 10:00:00	-114.023	354.946	468.969
2015-01-18 11:00:00	-251.444	347.149	598.594
2015-01-18 12:00:00	-335.913	341.018	676.931
2015-01-18 13:00:00	-362.041	334.239	696.28
2015-01-18 14:00:00	-320.852	323.943	644.795
2015-01-18 15:00:00	-168.835	359.348	528.183
2015-01-18 16:00:00	49.6625	367.204	317.541
2015-01-18 17:00:00	355.632	415.354	59.7221
2015-01-18 18:00:00	487.345	472.135	-15.2105
2015-01-18 19:00:00	488.695	473.032	-15.6632
2015-01-18 20:00:00	454.312	438.877	-15.4354
2015-01-18 21:00:00	419.852	410.152	-9.70005
2015-01-18 22:00:00	357.297	350.501	-6.79613
2015-01-18 23:00:00	290.946	284.783	-6.1627
2015-01-19	256.502	249.575	-6.92707
2015-01-19 01:00:00	247.359	241.863	-5.49575
2015-01-19 02:00:00	234.589	230.649	-3.9403
2015-01-19 03:00:00	239.227	234.849	-4.37732
2015-01-19 04:00:00	261.164	255.606	-5.55847
2015-01-19 05:00:00	268.853	257.737	-11.1159
2015-01-19 06:00:00	340.239	332.187	-8.05285
2015-01-19 07:00:00	375.475	377.41	1.93543
2015-01-19 08:00:00	242.2	364.32	122.12
2015-01-19 09:00:00	31.0824	329.706	298.623
2015-01-19 10:00:00	-150.676	318.601	469.277
2015-01-19 11:00:00	-287.166	316.497	603.662
2015-01-19 12:00:00	-366.317	310.825	677.141
2015-01-19 13:00:00	-369.752	311.713	681.466
2015-01-19 14:00:00	-321.332	309.35	630.681
2015-01-19 15:00:00	-205.345	305.385	510.729
2015-01-19 16:00:00	70.0363	328.881	258.845
2015-01-19 17:00:00	311.426	372.523	61.0973
2015-01-19 18:00:00	466.773	450.993	-15.7803
2015-01-19 19:00:00	476.89	465.659	-11.2312
2015-01-19 20:00:00	446.481	437.124	-9.3566
2015-01-19 21:00:00	420.63	411.685	-8.9454
2015-01-19 22:00:00	354.249	340.001	-14.248
2015-01-19 23:00:00	277.124	265.316	-11.808
2015-01-20	214.333	206.15	-8.18298
2015-01-20 01:00:00	193.034	188.03	-5.00437
2015-01-20 02:00:00	202.356	198.705	-3.65132
2015-01-20 03:00:00	218.52	214.845	-3.67512
2015-01-20 04:00:00	232.066	228.023	-4.04367
2015-01-20 05:00:00	267.901	257.558	-10.343
2015-01-20 06:00:00	370.812	363.439	-7.37235
2015-01-20 07:00:00	403.868	409.134	5.26552
2015-01-20 08:00:00	206.666	332.913	126.247
2015-01-20 09:00:00	-6.95505	295.559	302.514
2015-01-20 10:00:00	-168.439	287	455.439
2015-01-20 11:00:00	-313.326	267.523	580.849
2015-01-20 12:00:00	-391.961	253.543	645.504
2015-01-20 13:00:00	-410.885	249.822	660.708
2015-01-20 14:00:00	-380.098	234.872	614.97
2015-01-20 15:00:00	-246.751	244.842	491.593
2015-01-20 16:00:00	-33.0161	246.31	279.326
2015-01-20 17:00:00	257.897	304.587	46.6898
2015-01-20 18:00:00	422.235	409.907	-12.3281
2015-01-20 19:00:00	466.8	454.764	-12.0363
2015-01-20 20:00:00	469.55	461.879	-7.67013
2015-01-20 21:00:00	442.089	434.095	-7.99403
2015-01-20 22:00:00	365.549	355.78	-9.76858
2015-01-20 23:00:00	280.097	270.343	-9.75435
2015-01-21	221.566	212.407	-9.15948
2015-01-21 01:00:00	197.52	193.008	-4.51202
2015-01-21 02:00:00	191.605	188.502	-3.1039
2015-01-21 03:00:00	189.386	186.299	-3.08657
2015-01-21 04:00:00	208.014	204.78	-3.23467
2015-01-21 05:00:00	225.968	217.495	-8.47268
2015-01-21 06:00:00	310.742	303.349	-7.39295
2015-01-21 07:00:00	369.368	364.595	-4.77333
2015-01-21 08:00:00	306.211	322.676	16.4648
2015-01-21 09:00:00	273.29	309.908	36.6182
2015-01-21 10:00:00	247.96	306.696	58.736
2015-01-21 11:00:00	135.725	296.345	160.62
2015-01-21 12:00:00	171.265	282.268	111.003
2015-01-21 13:00:00	218.779	280.261	61.4819
2015-01-21 14:00:00	237.03	282.664	45.634
2015-01-21 15:00:00	280.433	285.032	4.59893
2015-01-21 16:00:00	320.813	314.047	-6.76603
2015-01-21 17:00:00	419.521	406.256	-13.2655
2015-01-21 18:00:00	495.056	479.641	-15.4151
2015-01-21 19:00:00	524.343	509.605	-14.7389
2015-01-21 20:00:00	491.631	482.876	-8.75473
2015-01-21 21:00:00	429.552	420.115	-9.4367
2015-01-21 22:00:00	370.441	359.285	-11.1559
2015-01-21 23:00:00	299.672	287.75	-11.9229
2015-01-22	253.586	244.842	-8.74407
2015-01-22 01:00:00	226.64	220.899	-5.74133
2015-01-22 02:00:00	213.104	208.363	-4.74037
2015-01-22 03:00:00	231.04	226.952	-4.0874
2015-01-22 04:00:00	238.408	233.585	-4.82263
2015-01-22 05:00:00	271.735	259.099	-12.6359
2015-01-22 06:00:00	373.849	362.915	-10.934
2015-01-22 07:00:00	421.113	414.811	-6.30218
2015-01-22 08:00:00	362.778	358.298	-4.48062
2015-01-22 09:00:00	324.446	331.984	7.53765
2015-01-22 10:00:00	330.018	347.698	17.6799
2015-01-22 11:00:00	324.837	362.901	38.064
2015-01-22 12:00:00	295.889	353.739	57.8504
2015-01-22 13:00:00	311.077	353.01	41.9321
2015-01-22 14:00:00	318.575	348.792	30.2172
2015-01-22 15:00:00	328.685	361.322	32.6374
2015-01-22 16:00:00	393.464	401.954	8.49015
2015-01-22 17:00:00	483.606	471.223	-12.3828
2015-01-22 18:00:00	563.987	551.012	-12.9748
2015-01-22 19:00:00	618.829	606.109	-12.7202
2015-01-22 20:00:00	562.709	549.213	-13.4963
2015-01-22 21:00:00	499.785	490.711	-9.0735
2015-01-22 22:00:00	450.373	440.219	-10.1541
2015-01-22 23:00:00	395.1	383.637	-11.4628
2015-01-23	329.514	321.502	-8.01168
2015-01-23 01:00:00	291.636	286.153	-5.48312
2015-01-23 02:00:00	276.823	271.388	-5.43468
2015-01-23 03:00:00	284.87	279.446	-5.42415
2015-01-23 04:00:00	287.294	280.726	-6.56808
2015-01-23 05:00:00	320.37	311.299	-9.07152
2015-01-23 06:00:00	415.922	406.745	-9.17675
2015-01-23 07:00:00	471.022	463.664	-7.35818
2015-01-23 08:00:00	418.197	419.666	1.46958
2015-01-23 09:00:00	371.196	382.624	11.4283
2015-01-23 10:00:00	343.588	379.881	36.2925
2015-01-23 11:00:00	286.791	390.503	103.712
2015-01-23 12:00:00	251.252	381.252	130
2015-01-23 13:00:00	53.8461	371.368	317.522
2015-01-23 14:00:00	98.6496	353.95	255.3
2015-01-23 15:00:00	32.6125	342.291	309.679
2015-01-23 16:00:00	218.733	369.221	150.488
2015-01-23 17:00:00	397.326	441.568	44.242
2015-01-23 18:00:00	536.69	531.588	-5.10125
2015-01-23 19:00:00	530.703	519.601	-11.1015
2015-01-23 20:00:00	552.595	540.678	-11.917
2015-01-23 21:00:00	502.045	489.269	-12.7761
2015-01-23 22:00:00	424.117	409.864	-14.2524
2015-01-23 23:00:00	366.791	355.462	-11.3295
2015-01-24	338.338	328.948	-9.38955
2015-01-24 01:00:00	326.673	321.119	-5.55355
2015-01-24 02:00:00	315.399	309.128	-6.27068
2015-01-24 03:00:00	343.757	337.061	-6.69593
2015-01-24 04:00:00	361.768	354.417	-7.35068
2015-01-24 05:00:00	367.857	357.197	-10.6603
2015-01-24 06:00:00	382.392	372.565	-9.82788
2015-01-24 07:00:00	436.155	437.302	1.14755
2015-01-24 08:00:00	283.403	414.889	131.486
2015-01-24 09:00:00	89.2357	402.369	313.133
2015-01-24 10:00:00	-77.4154	413.612	491.027
2015-01-24 11:00:00	-229.428	407.404	636.832
2015-01-24 12:00:00	-279.604	368.022	647.626
2015-01-24 13:00:00	-323.652	356.207	679.859
2015-01-24 14:00:00	-131.442	322.753	454.195
2015-01-24 15:00:00	2.34713	348.6	346.253
2015-01-24 16:00:00	163.141	344.814	181.673
2015-01-24 17:00:00	343.22	357.058	13.8377
2015-01-24 18:00:00	437.779	424.558	-13.2209
2015-01-24 19:00:00	436.201	423.684	-12.5172
2015-01-24 20:00:00	411.673	401.977	-9.69613
2015-01-24 21:00:00	410.296	399.323	-10.973
2015-01-24 22:00:00	381.287	371.856	-9.43062
2015-01-24 23:00:00	342.203	332.639	-9.56438
2015-01-25	306.195	297.113	-9.0816
2015-01-25 01:00:00	278.816	272.827	-5.98893
2015-01-25 02:00:00	262.079	257.042	-5.03733
2015-01-25 03:00:00	259.543	254.096	-5.44672
2015-01-25 04:00:00	257.876	252.687	-5.18867
2015-01-25 05:00:00	273.451	263.976	-9.47487
2015-01-25 06:00:00	316.648	309.474	-7.17403
2015-01-25 07:00:00	360.935	363.084	2.14902
2015-01-25 08:00:00	252.33	381.737	129.406
2015-01-25 09:00:00	59.9997	365.918	305.918
2015-01-25 10:00:00	-101.371	367.352	468.723
2015-01-25 11:00:00	-227.816	373.336	601.152
2015-01-25 12:00:00	-274.206	360.591	634.797
2015-01-25 13:00:00	-343.694	334.981	678.674
2015-01-25 14:00:00	-324.588	333.244	657.832
2015-01-25 15:00:00	-136.794	344.576	481.37
2015-01-25 16:00:00	50.624	336.366	285.742
2015-01-25 17:00:00	308.412	358.957	50.5457
2015-01-25 18:00:00	439.601	424.312	-15.2884
2015-01-25 19:00:00	480.173	465.405	-14.7684
2015-01-25 20:00:00	460.823	451.117	-9.706
2015-01-25 21:00:00	445.017	435.492	-9.5255
2015-01-25 22:00:00	381.32	372.291	-9.02873
2015-01-25 23:00:00	289.189	281.391	-7.79757
2015-01-26	241.25	234.454	-6.79643
2015-01-26 01:00:00	211.077	206.137	-4.93928
2015-01-26 02:00:00	216.201	212.466	-3.73523
2015-01-26 03:00:00	238.072	232.943	-5.12912
2015-01-26 04:00:00	255.231	249.222	-6.00848
2015-01-26 05:00:00	270.632	262.406	-8.22573
2015-01-26 06:00:00	355.785	348.469	-7.3159
2015-01-26 07:00:00	397.776	405.611	7.83493
2015-01-26 08:00:00	235.431	334.226	98.7951
2015-01-26 09:00:00	35.3624	298.086	262.724
2015-01-26 10:00:00	-173.907	277.962	451.869
2015-01-26 11:00:00	-316.777	263.737	580.514
2015-01-26 12:00:00	-257.154	254.677	511.831
2015-01-26 13:00:00	-310.931	251.038	561.969
2015-01-26 14:00:00	-263.192	234.893	498.085
2015-01-26 15:00:00	-45.0797	241.679	286.759
2015-01-26 16:00:00	135.145	266.185	131.04
2015-01-26 17:00:00	295.237	329.707	34.4706
2015-01-26 18:00:00	431.519	424.302	-7.21712
2015-01-26 19:00:00	478.065	462.989	-15.0762
2015-01-26 20:00:00	447.441	435.979	-11.4622
2015-01-26 21:00:00	409.917	400.791	-9.12617
2015-01-26 22:00:00	365.65	354.446	-11.2034
2015-01-26 23:00:00	274.756	267.055	-7.70103
2015-01-27	237.912	231.157	-6.75477
2015-01-27 01:00:00	203.645	199.219	-4.42587
2015-01-27 02:00:00	205.03	201.507	-3.52362
2015-01-27 03:00:00	224.089	221.085	-3.0035
2015-01-27 04:00:00	216.829	213.144	-3.6851
2015-01-27 05:00:00	245.344	234.888	-10.4562
2015-01-27 06:00:00	347.622	339.381	-8.241
2015-01-27 07:00:00	378.699	381.217	2.51803
2015-01-27 08:00:00	204.148	330.999	126.852
2015-01-27 09:00:00	13.7887	302.003	288.214
2015-01-27 10:00:00	-180.821	269.853	450.675
2015-01-27 11:00:00	-335.765	262.429	598.195
2015-01-27 12:00:00	-391.252	267.177	658.429
2015-01-27 13:00:00	-414.315	252.553	666.868
2015-01-27 14:00:00	-380.352	239.02	619.372
2015-01-27 15:00:00	-255.796	253.652	509.448
2015-01-27 16:00:00	-54.6464	267.243	321.889
2015-01-27 17:00:00	246.717	334.973	88.255
2015-01-27 18:00:00	449.666	447.166	-2.50005
2015-01-27 19:00:00	462.653	458.875	-3.77755
2015-01-27 20:00:00	441.49	438.09	-3.40067
2015-01-27 21:00:00	415.894	413.408	-2.48637
2015-01-27 22:00:00	355.155	352.707	-2.44842
2015-01-27 23:00:00	273.83	271.636	-2.19407
2015-01-28	216.315	214.257	-2.05837
2015-01-28 01:00:00	202.46	201.244	-1.21667
2015-01-28 02:00:00	201.961	200.777	-1.18338
2015-01-28 03:00:00	202.716	201.462	-1.25378
2015-01-28 04:00:00	214.738	213.234	-1.50367
2015-01-28 05:00:00	231.395	229.831	-1.5642
2015-01-28 06:00:00	323.936	321.446	-2.48973
2015-01-28 07:00:00	378.413	387.835	9.42243
2015-01-28 08:00:00	185.727	312.589	126.862
2015-01-28 09:00:00	-27.1539	275.349	302.503
2015-01-28 10:00:00	-200.202	265.557	465.76
2015-01-28 11:00:00	-323.417	260.563	583.98
2015-01-28 12:00:00	-391.544	261.332	652.876
2015-01-28 13:00:00	-460.824	238.674	699.498
2015-01-28 14:00:00	-422.42	239.456	661.876
2015-01-28 15:00:00	-306.048	236.879	542.928
2015-01-28 16:00:00	-71.7793	266.807	338.587
2015-01-28 17:00:00	234.116	326.318	92.2025
2015-01-28 18:00:00	403.604	399.838	-3.76565
2015-01-28 19:00:00	433.764	426.755	-7.00843
2015-01-28 20:00:00	453.986	448.486	-5.49973
2015-01-28 21:00:00	414.974	415.379	0.40485
2015-01-28 22:00:00	356.908	354.185	-2.7225
2015-01-28 23:00:00	284.51	281.989	-2.52065
2015-01-29	228.108	226.066	-2.04248
2015-01-29 01:00:00	184.992	183.504	-1.4885
2015-01-29 02:00:00	168.45	167.374	-1.07553
2015-01-29 03:00:00	171.16	169.841	-1.31885
2015-01-29 04:00:00	173.012	171.827	-1.18442
2015-01-29 05:00:00	207	205.307	-1.69278
2015-01-29 06:00:00	270.171	268.493	-1.6773
2015-01-29 07:00:00	327.308	328.144	0.836433
2015-01-29 08:00:00	254.76	317.749	62.9888
2015-01-29 09:00:00	67.1879	264.796	197.608
2015-01-29 10:00:00	-190.258	252.486	442.744
2015-01-29 11:00:00	-317.802	244.934	562.736
2015-01-29 12:00:00	-398.555	251.469	650.025
2015-01-29 13:00:00	-421.328	239.126	660.455
2015-01-29 14:00:00	-368.136	236.224	604.36
2015-01-29 15:00:00	-241.861	246.667	488.528
2015-01-29 16:00:00	6.26888	258.269	252
2015-01-29 17:00:00	290.53	327.361	36.8302
2015-01-29 18:00:00	412.585	410.574	-2.01123
2015-01-29 19:00:00	436.329	427.616	-8.71285
2015-01-29 20:00:00	403.571	400.922	-2.64847
2015-01-29 21:00:00	411.292	410.99	-0.301683
2015-01-29 22:00:00	368.688	366.674	-2.01405
2015-01-29 23:00:00	293.903	292.456	-1.44687
2015-01-30	228.423	227.059	-1.36442
2015-01-30 01:00:00	190.279	189.392	-0.8864
2015-01-30 02:00:00	181.282	180.228	-1.05435
2015-01-30 03:00:00	189.238	188.185	-1.0536
2015-01-30 04:00:00	198.825	197.503	-1.32188
2015-01-30 05:00:00	214.287	212.33	-1.95733
2015-01-30 06:00:00	285.535	282.502	-3.03293
2015-01-30 07:00:00	361.149	357.239	-3.90928
2015-01-30 08:00:00	320.47	330.991	10.5204
2015-01-30 09:00:00	271.242	325.728	54.4862
2015-01-30 10:00:00	118.746	312.773	194.027
2015-01-30 11:00:00	-191.864	285.06	476.925
2015-01-30 12:00:00	-151.934	270.295	422.23
2015-01-30 13:00:00	-222.16	268.148	490.307
2015-01-30 14:00:00	-190.309	262.435	452.743
2015-01-30 15:00:00	31.8552	267.721	235.865
2015-01-30 16:00:00	159.523	297.392	137.869
2015-01-30 17:00:00	326.848	362.721	35.8732
2015-01-30 18:00:00	449.363	449.411	0.0476667
2015-01-30 19:00:00	453.724	452.421	-1.30282
2015-01-30 20:00:00	434.034	426.219	-7.81538
2015-01-30 21:00:00	388.33	378.707	-9.62327
2015-01-30 22:00:00	372.51	366.834	-5.67547
2015-01-30 23:00:00	322.624	321.387	-1.23718
2015-01-31	268.274	266.082	-2.19173
2015-01-31 01:00:00	231.902	230.204	-1.69778
2015-01-31 02:00:00	226.039	224.247	-1.79142
2015-01-31 03:00:00	233.021	230.825	-2.1959
2015-01-31 04:00:00	228.87	226.641	-2.22922
2015-01-31 05:00:00	239.131	237.067	-2.06382
2015-01-31 06:00:00	262.898	261.385	-1.51295
2015-01-31 07:00:00	311.169	308.538	-2.63142
2015-01-31 08:00:00	339.536	346.158	6.62187
2015-01-31 09:00:00	350.308	375.053	24.7454
2015-01-31 10:00:00	347.989	392.458	44.4685
2015-01-31 11:00:00	350.385	414.727	64.3417
2015-01-31 12:00:00	293.009	407.138	114.129
2015-01-31 13:00:00	361.98	423.494	61.5144
2015-01-31 14:00:00	359.659	398.949	39.2904
2015-01-31 15:00:00	378.406	400.597	22.191
2015-01-31 16:00:00	430.87	435.77	4.89977
2015-01-31 17:00:00	455.145	456.573	1.42852
2015-01-31 18:00:00	484.277	484.195	-0.0823667
2015-01-31 19:00:00	444.081	438.724	-5.35678
2015-01-31 20:00:00	439.238	435.725	-3.51298
2015-01-31 21:00:00	413.527	408.727	-4.79973
2015-01-31 22:00:00	357.994	354.269	-3.72557
2015-01-31 23:00:00	297.422	295.265	-2.15768
2015-02-01	220.157	218.381	-1.7753
2015-02-01 01:00:00	197.006	195.124	-1.88133
2015-02-01 02:00:00	192.93	191.91	-1.02075
2015-02-01 03:00:00	184.799	183.674	-1.12465
2015-02-01 04:00:00	188.239	187.317	-0.922817
2015-02-01 05:00:00	196.354	195.012	-1.3424
2015-02-01 06:00:00	200.01	198.872	-1.13747
2015-02-01 07:00:00	247.738	245.415	-2.323
2015-02-01 08:00:00	230.323	301.319	70.9963
2015-02-01 09:00:00	76.3743	330.176	253.802
2015-02-01 10:00:00	-13.8725	336.118	349.99
2015-02-01 11:00:00	-74.9761	335.855	410.832
2015-02-01 12:00:00	-174.697	362.983	537.68
2015-02-01 13:00:00	-304.202	350.105	654.307
2015-02-01 14:00:00	-141.763	340.592	482.355
2015-02-01 15:00:00	115.396	373.378	257.982
2015-02-01 16:00:00	169.174	409.415	240.241
2015-02-01 17:00:00	380.06	452.183	72.1232
2015-02-01 18:00:00	465.495	459.124	-6.37137
2015-02-01 19:00:00	462.713	454.368	-8.34523
2015-02-01 20:00:00	430.955	425.877	-5.07815
2015-02-01 21:00:00	412.856	409.379	-3.47613
2015-02-01 22:00:00	355.096	351.811	-3.28508
2015-02-01 23:00:00	273.57	270.508	-3.06158
2015-02-02	252.607	247.349	-5.258
2015-02-02 01:00:00	231.199	228.738	-2.46072
2015-02-02 02:00:00	222.922	221.188	-1.7341
2015-02-02 03:00:00	242.613	240.399	-2.21458
2015-02-02 04:00:00	270.245	267.95	-2.29522
2015-02-02 05:00:00	312.843	309.753	-3.09022
2015-02-02 06:00:00	421.152	419.646	-1.50582
2015-02-02 07:00:00	473.652	475.114	1.46233
2015-02-02 08:00:00	326.922	412.013	85.0903
2015-02-02 09:00:00	81.7603	354.824	273.063
2015-02-02 10:00:00	-112.551	340.876	453.427
2015-02-02 11:00:00	-240.252	337.947	578.199
2015-02-02 12:00:00	-290.424	330.653	621.077
2015-02-02 13:00:00	-292.063	321.506	613.569
2015-02-02 14:00:00	-115.212	294.544	409.756
2015-02-02 15:00:00	-4.3545	299.191	303.545
2015-02-02 16:00:00	233.501	360.588	127.088
2015-02-02 17:00:00	406.779	421.855	15.0766
2015-02-02 18:00:00	505.071	500.287	-4.78387
2015-02-02 19:00:00	518.849	512.272	-6.57677
2015-02-02 20:00:00	518.111	513.931	-4.1806
2015-02-02 21:00:00	482.4	476.485	-5.91535
2015-02-02 22:00:00	423.324	417.995	-5.32885
2015-02-02 23:00:00	362.18	355.096	-7.08382
2015-02-03	276.975	274.504	-2.47072
2015-02-03 01:00:00	260.761	258.964	-1.79673
2015-02-03 02:00:00	261.819	259.579	-2.23937
2015-02-03 03:00:00	272.936	270.377	-2.5592
2015-02-03 04:00:00	290.778	289.101	-1.67767
2015-02-03 05:00:00	312.457	309.604	-2.85283
2015-02-03 06:00:00	396.925	395.451	-1.47438
2015-02-03 07:00:00	458.021	451.216	-6.80498
2015-02-03 08:00:00	395.959	397.663	1.70443
2015-02-03 09:00:00	347.04	365.208	18.1683
2015-02-03 10:00:00	283.982	355.007	71.0255
2015-02-03 11:00:00	281.541	365.85	84.3091
2015-02-03 12:00:00	306.079	395.904	89.8246
2015-02-03 13:00:00	299.891	362.667	62.7756
2015-02-03 14:00:00	301.038	354.51	53.4721
2015-02-03 15:00:00	291.137	377.357	86.2206
2015-02-03 16:00:00	327.569	391.431	63.8617
2015-02-03 17:00:00	462.649	470.535	7.8864
2015-02-03 18:00:00	561.386	556.15	-5.23633
2015-02-03 19:00:00	573.032	566.556	-6.47568
2015-02-03 20:00:00	571.088	561.98	-9.1082
2015-02-03 21:00:00	494.476	485.039	-9.4368
2015-02-03 22:00:00	409.699	401.356	-8.34312
2015-02-03 23:00:00	334.946	331.184	-3.76193
2015-02-04	298.648	294.374	-4.27412
2015-02-04 01:00:00	259.902	254.718	-5.18365
2015-02-04 02:00:00	267.966	262.931	-5.03553
2015-02-04 03:00:00	269.344	267.95	-1.39432
2015-02-04 04:00:00	283.437	281.411	-2.0265
2015-02-04 05:00:00	292.81	290.104	-2.70597
2015-02-04 06:00:00	408.345	408.203	-0.141883
2015-02-04 07:00:00	425.397	439.697	14.3003
2015-02-04 08:00:00	288.912	347.528	58.6159
2015-02-04 09:00:00	246.358	311.744	65.3863
2015-02-04 10:00:00	230.29	314.755	84.4648
2015-02-04 11:00:00	152.739	300.344	147.605
2015-02-04 12:00:00	64.4522	292.058	227.606
2015-02-04 13:00:00	105.831	310.272	204.441
2015-02-04 14:00:00	157.077	294.572	137.495
2015-02-04 15:00:00	209.478	306.385	96.9074
2015-02-04 16:00:00	269.802	325.64	55.8371
2015-02-04 17:00:00	395.515	403.916	8.4005
2015-02-04 18:00:00	492.763	491.504	-1.2588
2015-02-04 19:00:00	503.226	499.623	-3.6039
2015-02-04 20:00:00	458.166	457.682	-0.4837
2015-02-04 21:00:00	427.617	428.171	0.553833
2015-02-04 22:00:00	376.756	376.369	-0.386317
2015-02-04 23:00:00	310.966	307.799	-3.16717
2015-02-05	266.418	262.584	-3.83465
2015-02-05 01:00:00	249.411	245.289	-4.12175
2015-02-05 02:00:00	241.399	239.196	-2.20328
2015-02-05 03:00:00	248.806	247.911	-0.895283
2015-02-05 04:00:00	281.525	281.282	-0.24265
2015-02-05 05:00:00	311.701	311.088	-0.612867
2015-02-05 06:00:00	393.614	392.268	-1.34587
2015-02-05 07:00:00	448.679	447.405	-1.27395
2015-02-05 08:00:00	380.405	399.142	18.7369
2015-02-05 09:00:00	261.266	350.277	89.0105
2015-02-05 10:00:00	205.223	353.146	147.923
2015-02-05 11:00:00	168.655	352.695	184.041
2015-02-05 12:00:00	143.863	357.094	213.231
2015-02-05 13:00:00	146.077	344.036	197.959
2015-02-05 14:00:00	162.63	344	181.371
2015-02-05 15:00:00	223.908	366.203	142.295
2015-02-05 16:00:00	327.352	413.506	86.1535
2015-02-05 17:00:00	456.132	474.818	18.6865
2015-02-05 18:00:00	533.471	535.933	2.46207
2015-02-05 19:00:00	584.631	580.186	-4.44588
2015-02-05 20:00:00	555.637	550.96	-4.67655
2015-02-05 21:00:00	491.036	487.078	-3.95853
2015-02-05 22:00:00	424.752	419.11	-5.6424
2015-02-05 23:00:00	352.468	350.881	-1.58715
2015-02-06	301.068	298.494	-2.57475
2015-02-06 01:00:00	272.992	272.359	-0.633133
2015-02-06 02:00:00	277.415	277.868	0.453183
2015-02-06 03:00:00	290.318	290.158	-0.1596
2015-02-06 04:00:00	309.165	307.826	-1.33942
2015-02-06 05:00:00	323.03	322.062	-0.967417
2015-02-06 06:00:00	435.408	434.359	-1.04893
2015-02-06 07:00:00	472.195	478.543	6.34772
2015-02-06 08:00:00	323.219	403.831	80.612
2015-02-06 09:00:00	136.944	353.305	216.361
2015-02-06 10:00:00	3.73017	331.107	327.377
2015-02-06 11:00:00	-301.5	303.065	604.565
2015-02-06 12:00:00	-451.298	288.38	739.678
2015-02-06 13:00:00	-479.974	282.245	762.219
2015-02-06 14:00:00	-450.774	265.3	716.074
2015-02-06 15:00:00	-350.152	248.861	599.013
2015-02-06 16:00:00	-105.193	287.942	393.134
2015-02-06 17:00:00	225.863	347.372	121.509
2015-02-06 18:00:00	429.233	420.933	-8.29992
2015-02-06 19:00:00	438.073	431.701	-6.37172
2015-02-06 20:00:00	401.745	400.315	-1.43063
2015-02-06 21:00:00	407.164	401.274	-5.88992
2015-02-06 22:00:00	410.241	404.675	-5.56527
2015-02-06 23:00:00	351.289	344.467	-6.82175
2015-02-07	299.56	297.681	-1.87982
2015-02-07 01:00:00	272.711	272.14	-0.570533
2015-02-07 02:00:00	258.275	257.244	-1.0311
2015-02-07 03:00:00	262.141	261.002	-1.13858
2015-02-07 04:00:00	269.218	268.631	-0.587017
2015-02-07 05:00:00	288.71	286.725	-1.98435
2015-02-07 06:00:00	325.137	323.517	-1.62032
2015-02-07 07:00:00	361.905	369.418	7.51292
2015-02-07 08:00:00	305.156	378.596	73.4396
2015-02-07 09:00:00	260.241	407.145	146.905
2015-02-07 10:00:00	-68.5572	395.616	464.173
2015-02-07 11:00:00	-343.72	333.351	677.071
2015-02-07 12:00:00	-398.2	356.96	755.16
2015-02-07 13:00:00	-423.107	346.636	769.743
2015-02-07 14:00:00	-396.481	325.032	721.513
2015-02-07 15:00:00	-275.6	319.981	595.581
2015-02-07 16:00:00	-85.2849	301.311	386.596
2015-02-07 17:00:00	195.284	319.826	124.542
2015-02-07 18:00:00	385.363	382.851	-2.51198
2015-02-07 19:00:00	387.955	386.596	-1.35933
2015-02-07 20:00:00	369.552	365.745	-3.80752
2015-02-07 21:00:00	372.661	368.059	-4.60235
2015-02-07 22:00:00	329.36	328.554	-0.806717
2015-02-07 23:00:00	291.108	289.234	-1.8737
2015-02-08	240.659	239.509	-1.15052
2015-02-08 01:00:00	219.286	218.35	-0.935917
2015-02-08 02:00:00	206.411	205.483	-0.9275
2015-02-08 03:00:00	208.186	207.834	-0.351733
2015-02-08 04:00:00	192.531	193.085	0.55335
2015-02-08 05:00:00	202.111	201.237	-0.874733
2015-02-08 06:00:00	220.478	219.465	-1.01293
2015-02-08 07:00:00	260.946	260.885	-0.0601833
2015-02-08 08:00:00	283.669	308.5	24.8305
2015-02-08 09:00:00	247.152	330.492	83.3405
2015-02-08 10:00:00	127.194	368.706	241.512
2015-02-08 11:00:00	-191.01	339.521	530.531
2015-02-08 12:00:00	-388.306	336.649	724.956
2015-02-08 13:00:00	-390.073	345.758	735.831
2015-02-08 14:00:00	-342.229	340.54	682.769
2015-02-08 15:00:00	-195.591	356.578	552.169
2015-02-08 16:00:00	7.99288	361.731	353.738
2015-02-08 17:00:00	255.355	361.387	106.032
2015-02-08 18:00:00	436.096	433.765	-2.33175
2015-02-08 19:00:00	483.147	482.76	-0.387183
2015-02-08 20:00:00	478.329	484.541	6.21147
2015-02-08 21:00:00	406.139	406.036	-0.10305
2015-02-08 22:00:00	321.801	321.161	-0.63985
2015-02-08 23:00:00	266.333	265.802	-0.530583
2015-02-09	209.125	208.256	-0.868917
2015-02-09 01:00:00	191.86	191.159	-0.701717
2015-02-09 02:00:00	187.16	185.906	-1.2536
2015-02-09 03:00:00	179.369	178.377	-0.991233
2015-02-09 04:00:00	184.24	183.119	-1.12105
2015-02-09 05:00:00	215.145	214.033	-1.11183
2015-02-09 06:00:00	296.737	295.867	-0.87
2015-02-09 07:00:00	330.155	346.582	16.4266
2015-02-09 08:00:00	163.554	318.575	155.021
2015-02-09 09:00:00	-48.3178	282.165	330.482
2015-02-09 10:00:00	-222.4	267.912	490.312
2015-02-09 11:00:00	-358.84	260.212	619.052
2015-02-09 12:00:00	-421.261	274.905	696.166
2015-02-09 13:00:00	-427.49	288.186	715.675
2015-02-09 14:00:00	-389.879	284.457	674.336
2015-02-09 15:00:00	-288.802	286.912	575.714
2015-02-09 16:00:00	-64.665	317.649	382.314
2015-02-09 17:00:00	213.983	346.182	132.199
2015-02-09 18:00:00	442.217	443.802	1.58517
2015-02-09 19:00:00	467.48	466.877	-0.603083
2015-02-09 20:00:00	455.098	451.86	-3.23868
2015-02-09 21:00:00	413.047	408.264	-4.78303
2015-02-09 22:00:00	358.168	355.175	-2.9922
2015-02-09 23:00:00	288.27	287.43	-0.84
2015-02-10	226.112	223.377	-2.73502
2015-02-10 01:00:00	198.76	196.447	-2.31362
2015-02-10 02:00:00	191.464	190.882	-0.582483
2015-02-10 03:00:00	199.895	199.552	-0.342533
2015-02-10 04:00:00	198.684	198.313	-0.37135
2015-02-10 05:00:00	216.499	216.363	-0.1357
2015-02-10 06:00:00	282.913	282.901	-0.0124167
2015-02-10 07:00:00	321.949	340.241	18.2924
2015-02-10 08:00:00	141.578	298.172	156.594
2015-02-10 09:00:00	-81.1195	255.575	336.695
2015-02-10 10:00:00	-264.738	246.985	511.723
2015-02-10 11:00:00	-407.583	248.885	656.468
2015-02-10 12:00:00	-464.517	264.579	729.096
2015-02-10 13:00:00	-479.525	267.339	746.865
2015-02-10 14:00:00	-451.887	251.244	703.131
2015-02-10 15:00:00	-341.997	243.008	585.005
2015-02-10 16:00:00	-117.502	271.186	388.688
2015-02-10 17:00:00	198.659	334.664	136.005
2015-02-10 18:00:00	440.65	438.878	-1.77232
2015-02-10 19:00:00	473.582	473.858	0.275717
2015-02-10 20:00:00	462.02	458.425	-3.59532
2015-02-10 21:00:00	413.143	408.684	-4.45863
2015-02-10 22:00:00	341.157	335.429	-5.72803
2015-02-10 23:00:00	270.134	267.329	-2.80467
2015-02-11	213.539	212.499	-1.03975
2015-02-11 01:00:00	201.576	201.279	-0.297767
2015-02-11 02:00:00	202.061	201.764	-0.297617
2015-02-11 03:00:00	189.011	188.751	-0.259617
2015-02-11 04:00:00	195.761	195.115	-0.646133
2015-02-11 05:00:00	209.943	209.239	-0.70415
2015-02-11 06:00:00	268.856	268.079	-0.777583
2015-02-11 07:00:00	315.854	321.237	5.38357
2015-02-11 08:00:00	216.89	288.502	71.6128
2015-02-11 09:00:00	-46.5217	276.542	323.064
2015-02-11 10:00:00	-258.296	253.113	511.409
2015-02-11 11:00:00	-391.748	242.091	633.84
2015-02-11 12:00:00	-421.426	251.16	672.586
2015-02-11 13:00:00	-435.585	240.879	676.464
2015-02-11 14:00:00	-444.986	235.419	680.405
2015-02-11 15:00:00	-326.524	257.789	584.313
2015-02-11 16:00:00	-110.488	278.021	388.509
2015-02-11 17:00:00	189.827	326.669	136.842
2015-02-11 18:00:00	402.499	401.064	-1.43482
2015-02-11 19:00:00	448.213	449.413	1.19992
2015-02-11 20:00:00	460.345	458.707	-1.6377
2015-02-11 21:00:00	421.058	419.686	-1.37212
2015-02-11 22:00:00	348.7	347.086	-1.61453
2015-02-11 23:00:00	279.618	277.381	-2.23705
2015-02-12	218.725	214.125	-4.59995
2015-02-12 01:00:00	190.434	189.983	-0.450867
2015-02-12 02:00:00	180.153	179.488	-0.66575
2015-02-12 03:00:00	192.979	192.446	-0.532483
2015-02-12 04:00:00	203.308	202.547	-0.760667
2015-02-12 05:00:00	225.993	225.042	-0.951067
2015-02-12 06:00:00	300.019	298.731	-1.28773
2015-02-12 07:00:00	326.715	345.509	18.7943
2015-02-12 08:00:00	172.418	319.244	146.826
2015-02-12 09:00:00	-43.0449	285.362	328.407
2015-02-12 10:00:00	-241.204	272.283	513.486
2015-02-12 11:00:00	-395.552	262.123	657.674
2015-02-12 12:00:00	-469.079	265.181	734.26
2015-02-12 13:00:00	-476.994	262.289	739.282
2015-02-12 14:00:00	-417.878	242.437	660.315
2015-02-12 15:00:00	-306.046	243.49	549.536
2015-02-12 16:00:00	-95.0652	274.736	369.801
2015-02-12 17:00:00	216.31	335.234	118.924
2015-02-12 18:00:00	400.123	401.544	1.42132
2015-02-12 19:00:00	465.104	463.262	-1.84173
2015-02-12 20:00:00	462.746	459.079	-3.66778
2015-02-12 21:00:00	427.348	421.554	-5.79362
2015-02-12 22:00:00	387.068	385.425	-1.64267
2015-02-12 23:00:00	307.111	306.384	-0.7273
2015-02-13	272.526	269.385	-3.141
2015-02-13 01:00:00	243.304	241.941	-1.36335
2015-02-13 02:00:00	237.61	236.585	-1.02528
2015-02-13 03:00:00	238.994	237.771	-1.22298
2015-02-13 04:00:00	251.835	251.359	-0.476617
2015-02-13 05:00:00	282.469	281.108	-1.36147
2015-02-13 06:00:00	353.492	351.674	-1.81847
2015-02-13 07:00:00	381.451	399.213	17.7623
2015-02-13 08:00:00	201.362	351.383	150.021
2015-02-13 09:00:00	-2.62682	322.748	325.375
2015-02-13 10:00:00	-187.538	310.166	497.704
2015-02-13 11:00:00	-352.065	286.147	638.212
2015-02-13 12:00:00	-442.45	263.163	705.613
2015-02-13 13:00:00	-245.61	271.514	517.123
2015-02-13 14:00:00	-199.214	249.704	448.918
2015-02-13 15:00:00	-292.877	259.975	552.852
2015-02-13 16:00:00	-63.8445	296.386	360.231
2015-02-13 17:00:00	232.756	344.839	112.083
2015-02-13 18:00:00	386.636	388.387	1.75133
2015-02-13 19:00:00	415.26	411.812	-3.44768
2015-02-13 20:00:00	406.612	404.022	-2.5893
2015-02-13 21:00:00	391.358	384.877	-6.48122
2015-02-13 22:00:00	355.726	355.13	-0.595533
2015-02-13 23:00:00	288.377	287.522	-0.854867
2015-02-14	257.606	253.202	-4.4039
2015-02-14 01:00:00	228.36	225.445	-2.91502
2015-02-14 02:00:00	239.631	239.555	-0.0759
2015-02-14 03:00:00	213.606	213.388	-0.21875
2015-02-14 04:00:00	227.021	226.855	-0.165517
2015-02-14 05:00:00	237.146	236.669	-0.476633
2015-02-14 06:00:00	256.051	256.829	0.777817
2015-02-14 07:00:00	280.936	306.15	25.2137
2015-02-14 08:00:00	183.251	338.902	155.651
2015-02-14 09:00:00	15.9895	332.353	316.364
2015-02-14 10:00:00	-164.146	330.925	495.071
2015-02-14 11:00:00	-303.122	325.248	628.37
2015-02-14 12:00:00	-383.213	305.497	688.71
2015-02-14 13:00:00	-388.522	328.404	716.926
2015-02-14 14:00:00	-355.806	322.216	678.022
2015-02-14 15:00:00	-215.372	319.609	534.981
2015-02-14 16:00:00	49.6802	335.335	285.655
2015-02-14 17:00:00	277.929	345.077	67.1484
2015-02-14 18:00:00	422.174	422.697	0.523233
2015-02-14 19:00:00	432.067	433	0.933667
2015-02-14 20:00:00	429.868	427.9	-1.96852
2015-02-14 21:00:00	389.572	386.875	-2.6975
2015-02-14 22:00:00	346.013	346.015	0.00196667
2015-02-14 23:00:00	289.769	292.268	2.49992
2015-02-15	238.941	238.663	-0.2779
2015-02-15 01:00:00	202.513	203.117	0.603533
2015-02-15 02:00:00	187.52	188.189	0.6683
2015-02-15 03:00:00	187.843	189.036	1.19272
2015-02-15 04:00:00	192.216	192.949	0.732933
2015-02-15 05:00:00	196.639	197.191	0.552483
2015-02-15 06:00:00	200.125	200.44	0.314933
2015-02-15 07:00:00	237.809	243.79	5.98068
2015-02-15 08:00:00	226.136	296.657	70.5214
2015-02-15 09:00:00	271.399	350.751	79.3529
2015-02-15 10:00:00	235.477	381.567	146.09
2015-02-15 11:00:00	171.253	358.47	187.217
2015-02-15 12:00:00	149.148	390.608	241.459
2015-02-15 13:00:00	249.714	375.905	126.191
2015-02-15 14:00:00	320.938	358.693	37.7554
2015-02-15 15:00:00	338.744	385.608	46.8643
2015-02-15 16:00:00	340.863	389.633	48.7703
2015-02-15 17:00:00	398.142	412.956	14.8143
2015-02-15 18:00:00	464.907	461.396	-3.51108
2015-02-15 19:00:00	459.869	456.171	-3.69837
2015-02-15 20:00:00	442.002	440.458	-1.54418
2015-02-15 21:00:00	387.035	386.284	-0.750167
2015-02-15 22:00:00	336.378	335.917	-0.460517
2015-02-15 23:00:00	260.739	260.101	-0.638717
2015-02-16	215.127	214.722	-0.405867
2015-02-16 01:00:00	186.864	186.971	0.106483
2015-02-16 02:00:00	178.914	179.385	0.47145
2015-02-16 03:00:00	182.508	182.856	0.347817
2015-02-16 04:00:00	178.938	179.735	0.7973
2015-02-16 05:00:00	186.942	187.904	0.96215
2015-02-16 06:00:00	228.799	232.959	4.16018
2015-02-16 07:00:00	311.121	310.3	-0.82165
2015-02-16 08:00:00	354.314	360.619	6.30448
2015-02-16 09:00:00	329.063	372.545	43.4817
2015-02-16 10:00:00	272.46	366.379	93.9195
2015-02-16 11:00:00	308.495	394.491	85.9959
2015-02-16 12:00:00	289.084	417.906	128.822
2015-02-16 13:00:00	-30.912	409.366	440.278
2015-02-16 14:00:00	102.799	404.463	301.664
2015-02-16 15:00:00	113.565	405.444	291.88
2015-02-16 16:00:00	320.81	422.368	101.557
2015-02-16 17:00:00	466.85	486.623	19.7725
2015-02-16 18:00:00	582.028	580.436	-1.59133
2015-02-16 19:00:00	606.192	606.37	0.177133
2015-02-16 20:00:00	573.256	571.489	-1.76783
2015-02-16 21:00:00	514.568	510.117	-4.45045
2015-02-16 22:00:00	453.791	451.701	-2.08997
2015-02-16 23:00:00	366.088	366.013	-0.0752
2015-02-17	332.683	331.277	-1.406
2015-02-17 01:00:00	312.652	313.92	1.2683
2015-02-17 02:00:00	305.011	306.46	1.44923
2015-02-17 03:00:00	316.879	317.79	0.91065
2015-02-17 04:00:00	328.809	329.249	0.439983
2015-02-17 05:00:00	383.987	383.46	-0.527333
2015-02-17 06:00:00	459.924	460.006	0.082
2015-02-17 07:00:00	507.187	524.051	16.8637
2015-02-17 08:00:00	352.269	432.02	79.7515
2015-02-17 09:00:00	279.186	402.399	123.214
2015-02-17 10:00:00	81.9859	379.47	297.484
2015-02-17 11:00:00	41.667	369.457	327.79
2015-02-17 12:00:00	-20.7152	362.357	383.072
2015-02-17 13:00:00	-341.395	317.766	659.161
2015-02-17 14:00:00	-488.236	290.306	778.542
2015-02-17 15:00:00	-371.397	286.015	657.412
2015-02-17 16:00:00	-118.637	326.574	445.211
2015-02-17 17:00:00	225.801	396.616	170.816
2015-02-17 18:00:00	489.981	498.134	8.15332
2015-02-17 19:00:00	508.041	507.799	-0.241367
2015-02-17 20:00:00	523.288	520.005	-3.28265
2015-02-17 21:00:00	497.132	491.353	-5.77828
2015-02-17 22:00:00	417.249	417.545	0.29545
2015-02-17 23:00:00	358.98	358.068	-0.912033
2015-02-18	310.624	308.484	-2.13993
2015-02-18 01:00:00	317.023	314.702	-2.32025
2015-02-18 02:00:00	322.155	320.823	-1.33233
2015-02-18 03:00:00	309.024	307.273	-1.75103
2015-02-18 04:00:00	341.168	338.259	-2.9086
2015-02-18 05:00:00	372.231	369.171	-3.05953
2015-02-18 06:00:00	457.175	455.795	-1.38022
2015-02-18 07:00:00	478.891	505.335	26.4436
2015-02-18 08:00:00	203.937	386.367	182.43
2015-02-18 09:00:00	-52.1541	310.698	362.852
2015-02-18 10:00:00	-251.085	298.467	549.552
2015-02-18 11:00:00	-408.414	274.838	683.252
2015-02-18 12:00:00	-525.405	255.108	780.513
2015-02-18 13:00:00	-571.496	241.307	812.803
2015-02-18 14:00:00	-524.11	246.934	771.044
2015-02-18 15:00:00	-401.45	250.947	652.397
2015-02-18 16:00:00	-179.776	267.13	446.906
2015-02-18 17:00:00	166.011	341.528	175.517
2015-02-18 18:00:00	437.364	441.039	3.675
2015-02-18 19:00:00	466.076	460.76	-5.31645
2015-02-18 20:00:00	466.837	462.298	-4.53897
2015-02-18 21:00:00	433.026	431.181	-1.845
2015-02-18 22:00:00	378.79	376.468	-2.32193
2015-02-18 23:00:00	310.78	308.471	-2.3094
2015-02-19	282.223	278.58	-3.6428
2015-02-19 01:00:00	263.039	259.251	-3.78847
2015-02-19 02:00:00	263.259	258.8	-4.4597
2015-02-19 03:00:00	272.376	269.884	-2.49162
2015-02-19 04:00:00	290.086	289.678	-0.408167
2015-02-19 05:00:00	311.559	309.67	-1.88865
2015-02-19 06:00:00	402.483	401.016	-1.46685
2015-02-19 07:00:00	405.994	436.533	30.5389
2015-02-19 08:00:00	182.707	368.235	185.528
2015-02-19 09:00:00	-59.5174	299.511	359.029
2015-02-19 10:00:00	-269.96	282.576	552.536
2015-02-19 11:00:00	-381.694	285.719	667.413
2015-02-19 12:00:00	-451.653	272.377	724.029
2015-02-19 13:00:00	-516.687	259.11	775.796
2015-02-19 14:00:00	-499.074	261.902	760.976
2015-02-19 15:00:00	-393.141	248.904	642.046
2015-02-19 16:00:00	-165.593	270.348	435.941
2015-02-19 17:00:00	152.138	322.55	170.412
2015-02-19 18:00:00	386.273	392.18	5.90645
2015-02-19 19:00:00	449.224	447.379	-1.84485
2015-02-19 20:00:00	446.296	443.683	-2.61252
2015-02-19 21:00:00	425.023	421.321	-3.70203
2015-02-19 22:00:00	377.911	377.459	-0.452417
2015-02-19 23:00:00	305.41	303.977	-1.4329
2015-02-20	274.369	273.401	-0.967133
2015-02-20 01:00:00	221.436	221.017	-0.418717
2015-02-20 02:00:00	208.828	208.487	-0.340667
2015-02-20 03:00:00	219.96	219.325	-0.634967
2015-02-20 04:00:00	214.027	213	-1.02722
2015-02-20 05:00:00	228.056	227.003	-1.05292
2015-02-20 06:00:00	298.777	298.074	-0.702967
2015-02-20 07:00:00	336.491	341.533	5.04222
2015-02-20 08:00:00	261.175	314.937	53.7617
2015-02-20 09:00:00	155.804	282.954	127.15
2015-02-20 10:00:00	188.293	290.673	102.38
2015-02-20 11:00:00	171.58	292.709	121.129
2015-02-20 12:00:00	142.156	291.726	149.57
2015-02-20 13:00:00	15.0965	282.928	267.832
2015-02-20 14:00:00	-16.1354	264.11	280.246
2015-02-20 15:00:00	13.1558	268.488	255.332
2015-02-20 16:00:00	16.7273	272.731	256.003
2015-02-20 17:00:00	245.446	336.476	91.0304
2015-02-20 18:00:00	380.911	385.142	4.2313
2015-02-20 19:00:00	411.826	410.48	-1.34555
2015-02-20 20:00:00	420.4	416.458	-3.94168
2015-02-20 21:00:00	392.745	391.606	-1.13925
2015-02-20 22:00:00	352.842	350.214	-2.62777
2015-02-20 23:00:00	294.428	292.865	-1.56333
2015-02-21	246.624	245.63	-0.994317
2015-02-21 01:00:00	231.671	228.196	-3.4742
2015-02-21 02:00:00	221.734	217.218	-4.51623
2015-02-21 03:00:00	202.283	200.052	-2.23195
2015-02-21 04:00:00	193.161	192.297	-0.863517
2015-02-21 05:00:00	192.283	191.483	-0.800433
2015-02-21 06:00:00	196.273	195.106	-1.16677
2015-02-21 07:00:00	250.519	253.179	2.6597
2015-02-21 08:00:00	248.039	310.401	62.3624
2015-02-21 09:00:00	233.147	328.919	95.7725
2015-02-21 10:00:00	89.239	340.235	250.996
2015-02-21 11:00:00	-22.5445	342.011	364.555
2015-02-21 12:00:00	5.16195	345.046	339.884
2015-02-21 13:00:00	-107.748	344.548	452.296
2015-02-21 14:00:00	-209.974	353.136	563.11
2015-02-21 15:00:00	-132.473	336.657	469.13
2015-02-21 16:00:00	84.3499	364.859	280.509
2015-02-21 17:00:00	295.617	397.175	101.558
2015-02-21 18:00:00	435.601	434.588	-1.01275
2015-02-21 19:00:00	438.702	437.237	-1.46475
2015-02-21 20:00:00	415.692	415.582	-0.110183
2015-02-21 21:00:00	393.23	395.177	1.94695
2015-02-21 22:00:00	355.88	359.209	3.3289
2015-02-21 23:00:00	308.121	308.243	0.121133
2015-02-22	266.991	266.452	-0.53945
2015-02-22 01:00:00	237.816	237.188	-0.627333
2015-02-22 02:00:00	203.29	202.869	-0.4208
2015-02-22 03:00:00	198.677	198.205	-0.471683
2015-02-22 04:00:00	205.76	205.244	-0.51595
2015-02-22 05:00:00	201.239	200.381	-0.858317
2015-02-22 06:00:00	201.98	200.902	-1.0783
[truncated: 138 more rows]

## Sheet: pivot_statistics
Row Labels	Average of sum_use	StdDev of sum_use2	Average of sum_grid	StdDev of sum_grid2	Average of sum_gen	StdDev of sum_gen2
2014-12-01 23:00:00	338.38	#DIV/0!	341.099	#DIV/0!	-2.71883	#DIV/0!
2014-12-02 23:00:00	334.077	#DIV/0!	336.786	#DIV/0!	-2.70878	#DIV/0!
2014-12-03 23:00:00	301.206	#DIV/0!	302.899	#DIV/0!	-1.6936	#DIV/0!
2014-12-04 23:00:00	306.61	#DIV/0!	305.003	#DIV/0!	1.60758	#DIV/0!
2014-12-05 23:00:00	323.391	#DIV/0!	324.51	#DIV/0!	-1.11825	#DIV/0!
2014-12-06 23:00:00	339.101	#DIV/0!	342.228	#DIV/0!	-3.12745	#DIV/0!
2014-12-07 23:00:00	349.211	#DIV/0!	350.396	#DIV/0!	-1.1853	#DIV/0!
2014-12-08 23:00:00	329.331	#DIV/0!	330.334	#DIV/0!	-1.0033	#DIV/0!
2014-12-09 23:00:00	347.862	#DIV/0!	348.553	#DIV/0!	-0.691	#DIV/0!
2014-12-10 23:00:00	323.022	#DIV/0!	323.923	#DIV/0!	-0.90045	#DIV/0!
2014-12-11 23:00:00	320.404	#DIV/0!	322.301	#DIV/0!	-1.89748	#DIV/0!
2014-12-12 23:00:00	340.075	#DIV/0!	341.323	#DIV/0!	-1.24825	#DIV/0!
2014-12-13 23:00:00	339.486	#DIV/0!	342.582	#DIV/0!	-3.09545	#DIV/0!
2014-12-14 23:00:00	354.122	#DIV/0!	356.5	#DIV/0!	-2.37772	#DIV/0!
2014-12-15 23:00:00	322.219	#DIV/0!	323.76	#DIV/0!	-1.5411	#DIV/0!
2014-12-16 23:00:00	331.805	#DIV/0!	333.213	#DIV/0!	-1.4081	#DIV/0!
2014-12-17 23:00:00	363.753	#DIV/0!	364.894	#DIV/0!	-1.14093	#DIV/0!
2014-12-18 23:00:00	353.076	#DIV/0!	353.633	#DIV/0!	-0.557267	#DIV/0!
2014-12-19 23:00:00	397.125	#DIV/0!	398.133	#DIV/0!	-1.0078	#DIV/0!
2014-12-20 23:00:00	370.071	#DIV/0!	369.529	#DIV/0!	0.542383	#DIV/0!
2014-12-21 23:00:00	360.028	#DIV/0!	356.042	#DIV/0!	3.98583	#DIV/0!
2014-12-22 23:00:00	336.606	#DIV/0!	340.393	#DIV/0!	-3.78737	#DIV/0!
2014-12-23 23:00:00	391.428	#DIV/0!	391.643	#DIV/0!	-0.21535	#DIV/0!
2014-12-24 23:00:00	403.012	#DIV/0!	406.798	#DIV/0!	-3.78633	#DIV/0!
2014-12-25 23:00:00	335.754	#DIV/0!	339.22	#DIV/0!	-3.46558	#DIV/0!
2014-12-26 23:00:00	336.867	#DIV/0!	340.351	#DIV/0!	-3.48375	#DIV/0!
2014-12-27 23:00:00	362.864	#DIV/0!	359.744	#DIV/0!	3.11972	#DIV/0!
2014-12-28 23:00:00	428.581	#DIV/0!	428.623	#DIV/0!	-0.0415333	#DIV/0!
2014-12-29 23:00:00	335.765	#DIV/0!	338.439	#DIV/0!	-2.6741	#DIV/0!
2014-12-30 23:00:00	370.156	#DIV/0!	375.193	#DIV/0!	-5.03778	#DIV/0!
2014-12-31 23:00:00	433.871	#DIV/0!	440.531	#DIV/0!	-6.6594	#DIV/0!
2015-01-01 23:00:00	420.877	#DIV/0!	424.723	#DIV/0!	-3.8454	#DIV/0!
2015-01-02 23:00:00	388.522	#DIV/0!	396.475	#DIV/0!	-7.95238	#DIV/0!
2015-01-03 23:00:00	360.758	#DIV/0!	365.323	#DIV/0!	-4.56535	#DIV/0!
2015-01-04 23:00:00	430.519	#DIV/0!	436.083	#DIV/0!	-5.56448	#DIV/0!
2015-01-05 23:00:00	366.035	#DIV/0!	372.27	#DIV/0!	-6.23505	#DIV/0!
2015-01-06 23:00:00	307.384	#DIV/0!	310.739	#DIV/0!	-3.35485	#DIV/0!
2015-01-07 23:00:00	437.29	#DIV/0!	441.836	#DIV/0!	-4.54652	#DIV/0!
2015-01-08 23:00:00	440.124	#DIV/0!	446.518	#DIV/0!	-6.39478	#DIV/0!
2015-01-09 23:00:00	439.215	#DIV/0!	445.397	#DIV/0!	-6.18167	#DIV/0!
2015-01-10 23:00:00	440.367	#DIV/0!	447.295	#DIV/0!	-6.9284	#DIV/0!
2015-01-11 23:00:00	307.286	#DIV/0!	311.49	#DIV/0!	-4.20368	#DIV/0!
2015-01-12 23:00:00	369.424	#DIV/0!	376.698	#DIV/0!	-7.27405	#DIV/0!
2015-01-13 23:00:00	368.508	#DIV/0!	374.836	#DIV/0!	-6.32858	#DIV/0!
2015-01-14 23:00:00	382.156	#DIV/0!	387.429	#DIV/0!	-5.2729	#DIV/0!
2015-01-15 23:00:00	334.158	#DIV/0!	346.593	#DIV/0!	-12.4353	#DIV/0!
2015-01-16 23:00:00	346.954	#DIV/0!	356.755	#DIV/0!	-9.80078	#DIV/0!
2015-01-17 23:00:00	290.908	#DIV/0!	300.337	#DIV/0!	-9.42977	#DIV/0!
2015-01-18 23:00:00	284.783	#DIV/0!	290.946	#DIV/0!	-6.1627	#DIV/0!
2015-01-19 23:00:00	265.316	#DIV/0!	277.124	#DIV/0!	-11.808	#DIV/0!
2015-01-20 23:00:00	270.343	#DIV/0!	280.097	#DIV/0!	-9.75435	#DIV/0!
2015-01-21 23:00:00	287.75	#DIV/0!	299.672	#DIV/0!	-11.9229	#DIV/0!
2015-01-22 23:00:00	383.637	#DIV/0!	395.1	#DIV/0!	-11.4628	#DIV/0!
2015-01-23 23:00:00	355.462	#DIV/0!	366.791	#DIV/0!	-11.3295	#DIV/0!
2015-01-24 23:00:00	332.639	#DIV/0!	342.203	#DIV/0!	-9.56438	#DIV/0!
2015-01-25 23:00:00	281.391	#DIV/0!	289.189	#DIV/0!	-7.79757	#DIV/0!
2015-01-26 23:00:00	267.055	#DIV/0!	274.756	#DIV/0!	-7.70103	#DIV/0!
2015-01-27 23:00:00	271.636	#DIV/0!	273.83	#DIV/0!	-2.19407	#DIV/0!
2015-01-28 23:00:00	281.989	#DIV/0!	284.51	#DIV/0!	-2.52065	#DIV/0!
2015-01-29 23:00:00	292.456	#DIV/0!	293.903	#DIV/0!	-1.44687	#DIV/0!
2015-01-30 23:00:00	321.387	#DIV/0!	322.624	#DIV/0!	-1.23718	#DIV/0!
2015-01-31 23:00:00	295.265	#DIV/0!	297.422	#DIV/0!	-2.15768	#DIV/0!
2015-02-01 23:00:00	270.508	#DIV/0!	273.57	#DIV/0!	-3.06158	#DIV/0!
2015-02-02 23:00:00	355.096	#DIV/0!	362.18	#DIV/0!	-7.08382	#DIV/0!
2015-02-03 23:00:00	331.184	#DIV/0!	334.946	#DIV/0!	-3.76193	#DIV/0!
2015-02-04 23:00:00	307.799	#DIV/0!	310.966	#DIV/0!	-3.16717	#DIV/0!
2015-02-05 23:00:00	350.881	#DIV/0!	352.468	#DIV/0!	-1.58715	#DIV/0!
2015-02-06 23:00:00	344.467	#DIV/0!	351.289	#DIV/0!	-6.82175	#DIV/0!
2015-02-07 23:00:00	289.234	#DIV/0!	291.108	#DIV/0!	-1.8737	#DIV/0!
2015-02-08 23:00:00	265.802	#DIV/0!	266.333	#DIV/0!	-0.530583	#DIV/0!
2015-02-09 23:00:00	287.43	#DIV/0!	288.27	#DIV/0!	-0.84	#DIV/0!
2015-02-10 23:00:00	267.329	#DIV/0!	270.134	#DIV/0!	-2.80467	#DIV/0!
2015-02-11 23:00:00	277.381	#DIV/0!	279.618	#DIV/0!	-2.23705	#DIV/0!
2015-02-12 23:00:00	306.384	#DIV/0!	307.111	#DIV/0!	-0.7273	#DIV/0!
2015-02-13 23:00:00	287.522	#DIV/0!	288.377	#DIV/0!	-0.854867	#DIV/0!
2015-02-14 23:00:00	292.268	#DIV/0!	289.769	#DIV/0!	2.49992	#DIV/0!
2015-02-15 23:00:00	260.101	#DIV/0!	260.739	#DIV/0!	-0.638717	#DIV/0!
2015-02-16 23:00:00	366.013	#DIV/0!	366.088	#DIV/0!	-0.0752	#DIV/0!
2015-02-17 23:00:00	358.068	#DIV/0!	358.98	#DIV/0!	-0.912033	#DIV/0!
2015-02-18 23:00:00	308.471	#DIV/0!	310.78	#DIV/0!	-2.3094	#DIV/0!
2015-02-19 23:00:00	303.977	#DIV/0!	305.41	#DIV/0!	-1.4329	#DIV/0!
2015-02-20 23:00:00	292.865	#DIV/0!	294.428	#DIV/0!	-1.56333	#DIV/0!
2015-02-21 23:00:00	308.243	#DIV/0!	308.121	#DIV/0!	0.121133	#DIV/0!
2015-02-22 23:00:00	388.501	#DIV/0!	390.744	#DIV/0!	-2.2433	#DIV/0!
2015-02-23 23:00:00	449.922	#DIV/0!	454.956	#DIV/0!	-5.0332	#DIV/0!
2015-02-24 23:00:00	404.399	#DIV/0!	409.01	#DIV/0!	-4.61075	#DIV/0!
2015-02-25 23:00:00	346.075	#DIV/0!	348.571	#DIV/0!	-2.49577	#DIV/0!
2015-02-26 23:00:00	394.023	#DIV/0!	398.278	#DIV/0!	-4.25472	#DIV/0!
2015-02-27 23:00:00	485.613	#DIV/0!	495.504	#DIV/0!	-9.89107	#DIV/0!
Grand Total	341.578	50.8968	345.228	51.5419	-3.65035	3.51275

## Sheet: results
localhour	mean(sum_use)	sd(sum_use)	mean(sum_grid)	sd(sum_grid)	mean(sum_gen)	sd(sum_gen)
00:00:00	287.573	53.5003	291.051	54.2707	-3.478	2.9238
01:00:00	256.773	52.7769	259.035	53.0867	-2.26221	1.89362
02:00:00	250.335	55.9696	252.489	56.6493	-2.15434	1.77884
03:00:00	257.607	57.3909	259.636	58.1688	-2.02903	1.69599
04:00:00	265.892	60.907	268.074	61.8642	-2.18261	1.94171
05:00:00	282.068	63.1028	285.353	64.2772	-3.28567	3.34374
06:00:00	339.17	82.2161	342.119	83.5361	-2.9485	3.03859
07:00:00	389.281	84.6842	386.39	85.0031	2.89122	8.59608
08:00:00	370.005	57.3587	304.166	82.1562	65.8388	55.9967
09:00:00	359.874	61.0834	198.41	152.442	161.463	120.514
10:00:00	359.734	65.4185	104.374	216.703	255.36	180.129
11:00:00	358	71.992	16.6364	275.133	341.363	231.395
12:00:00	355.949	73.4053	-26.0143	303.274	381.964	259.494
13:00:00	348.226	74.3057	-45.4267	316.18	393.652	270.343
14:00:00	337.684	72.4902	-10.147	306.049	347.831	259.921
15:00:00	344.408	73.8404	71.9177	265.408	272.491	214.143
16:00:00	368.337	76.416	213.427	194.647	154.91	137.567
17:00:00	434.729	81.8076	401.437	120.139	33.2924	50.3881
18:00:00	505.919	77.0823	509.294	77.8143	-3.3753	5.10368
19:00:00	520.155	72.8454	524.937	73.5669	-4.78243	5.56674
20:00:00	505.958	68.2703	510.487	69.0775	-4.52907	4.64375
21:00:00	472.553	60.9216	477.314	61.6942	-4.76195	4.09678
22:00:00	414.816	52.1846	419.257	52.5613	-4.44142	3.66487
23:00:00	341.578	50.8968	345.228	51.5419	-3.65035	3.51275
