# Supplementary material
Source: MDPI journal article supplement (https://www.mdpi.com/2073-4336/8/4/45)
Supplement: s1 [file s1 › Part 1 - Data/Solar irradiation (NREL)/austin_ghi2012.csv]

Year	Month	Day	Hour	Minute	GHI
2011	12	1	0	0	0		Source	Location ID	City	State	GHI Units
2011	12	1	1	0	0		NSRDB	664175	Austin	TX	w/m2
2011	12	1	2	0	0		https://mapsbeta.nrel.gov/nsrdb-data-viewer/#/?activeLayers=0&baseLayer=groad&mapCenter=30.300723217778742%2C-97.61850357055664&zoomLevel=12
2011	12	1	3	0	0
2011	12	1	4	0	0
2011	12	1	5	0	0
2011	12	1	6	0	0
2011	12	1	7	0	0
2011	12	1	8	0	0
2011	12	1	9	0	0
2011	12	1	10	0	0
2011	12	1	11	0	0
2011	12	1	12	0	0
2011	12	1	13	0	0
2011	12	1	14	0	105
2011	12	1	15	0	171
2011	12	1	16	0	187
2011	12	1	17	0	274
2011	12	1	18	0	476
2011	12	1	19	0	217
2011	12	1	20	0	305
2011	12	1	21	0	407
2011	12	1	22	0	228
2011	12	1	23	0	48
2011	12	2	0	0	0
2011	12	2	1	0	0
2011	12	2	2	0	0
2011	12	2	3	0	0
2011	12	2	4	0	0
2011	12	2	5	0	0
2011	12	2	6	0	0
2011	12	2	7	0	0
2011	12	2	8	0	0
2011	12	2	9	0	0
2011	12	2	10	0	0
2011	12	2	11	0	0
2011	12	2	12	0	0
2011	12	2	13	0	0
2011	12	2	14	0	24
2011	12	2	15	0	6
2011	12	2	16	0	14
2011	12	2	17	0	18
2011	12	2	18	0	24
2011	12	2	19	0	145
2011	12	2	20	0	103
2011	12	2	21	0	181
2011	12	2	22	0	134
2011	12	2	23	0	28
2011	12	3	0	0	0
2011	12	3	1	0	0
2011	12	3	2	0	0
2011	12	3	3	0	0
2011	12	3	4	0	0
2011	12	3	5	0	0
2011	12	3	6	0	0
2011	12	3	7	0	0
2011	12	3	8	0	0
2011	12	3	9	0	0
2011	12	3	10	0	0
2011	12	3	11	0	0
2011	12	3	12	0	0
2011	12	3	13	0	0
2011	12	3	14	0	4
2011	12	3	15	0	58
2011	12	3	16	0	14
2011	12	3	17	0	31
2011	12	3	18	0	145
2011	12	3	19	0	174
2011	12	3	20	0	207
2011	12	3	21	0	301
2011	12	3	22	0	120
2011	12	3	23	0	26
2011	12	4	0	0	0
2011	12	4	1	0	0
2011	12	4	2	0	0
2011	12	4	3	0	0
2011	12	4	4	0	0
2011	12	4	5	0	0
2011	12	4	6	0	0
2011	12	4	7	0	0
2011	12	4	8	0	0
2011	12	4	9	0	0
2011	12	4	10	0	0
2011	12	4	11	0	0
2011	12	4	12	0	0
2011	12	4	13	0	0
2011	12	4	14	0	31
2011	12	4	15	0	99
2011	12	4	16	0	127
2011	12	4	17	0	20
2011	12	4	18	0	21
2011	12	4	19	0	85
2011	12	4	20	0	153
2011	12	4	21	0	133
2011	12	4	22	0	51
2011	12	4	23	0	11
2011	12	5	0	0	0
2011	12	5	1	0	0
2011	12	5	2	0	0
2011	12	5	3	0	0
2011	12	5	4	0	0
2011	12	5	5	0	0
2011	12	5	6	0	0
2011	12	5	7	0	0
2011	12	5	8	0	0
2011	12	5	9	0	0
2011	12	5	10	0	0
2011	12	5	11	0	0
2011	12	5	12	0	0
2011	12	5	13	0	0
2011	12	5	14	0	29
2011	12	5	15	0	87
2011	12	5	16	0	100
2011	12	5	17	0	121
2011	12	5	18	0	108
2011	12	5	19	0	120
2011	12	5	20	0	201
2011	12	5	21	0	142
2011	12	5	22	0	152
2011	12	5	23	0	32
2011	12	6	0	0	0
2011	12	6	1	0	0
2011	12	6	2	0	0
2011	12	6	3	0	0
2011	12	6	4	0	0
2011	12	6	5	0	0
2011	12	6	6	0	0
2011	12	6	7	0	0
2011	12	6	8	0	0
2011	12	6	9	0	0
2011	12	6	10	0	0
2011	12	6	11	0	0
2011	12	6	12	0	0
2011	12	6	13	0	0
2011	12	6	14	0	37
2011	12	6	15	0	160
2011	12	6	16	0	208
2011	12	6	17	0	599
2011	12	6	18	0	660
2011	12	6	19	0	284
2011	12	6	20	0	336
2011	12	6	21	0	433
2011	12	6	22	0	247
2011	12	6	23	0	54
2011	12	7	0	0	0
2011	12	7	1	0	0
2011	12	7	2	0	0
2011	12	7	3	0	0
2011	12	7	4	0	0
2011	12	7	5	0	0
2011	12	7	6	0	0
2011	12	7	7	0	0
2011	12	7	8	0	0
2011	12	7	9	0	0
2011	12	7	10	0	0
2011	12	7	11	0	0
2011	12	7	12	0	0
2011	12	7	13	0	0
2011	12	7	14	0	97
2011	12	7	15	0	295
2011	12	7	16	0	471
2011	12	7	17	0	595
2011	12	7	18	0	655
2011	12	7	19	0	646
2011	12	7	20	0	569
2011	12	7	21	0	349
2011	12	7	22	0	244
2011	12	7	23	0	53
2011	12	8	0	0	0
2011	12	8	1	0	0
2011	12	8	2	0	0
2011	12	8	3	0	0
2011	12	8	4	0	0
2011	12	8	5	0	0
2011	12	8	6	0	0
2011	12	8	7	0	0
2011	12	8	8	0	0
2011	12	8	9	0	0
2011	12	8	10	0	0
2011	12	8	11	0	0
2011	12	8	12	0	0
2011	12	8	13	0	0
2011	12	8	14	0	25
2011	12	8	15	0	93
2011	12	8	16	0	376
2011	12	8	17	0	303
2011	12	8	18	0	612
2011	12	8	19	0	603
2011	12	8	20	0	555
2011	12	8	21	0	419
2011	12	8	22	0	236
2011	12	8	23	0	50
2011	12	9	0	0	0
2011	12	9	1	0	0
2011	12	9	2	0	0
2011	12	9	3	0	0
2011	12	9	4	0	0
2011	12	9	5	0	0
2011	12	9	6	0	0
2011	12	9	7	0	0
2011	12	9	8	0	0
2011	12	9	9	0	0
2011	12	9	10	0	0
2011	12	9	11	0	0
2011	12	9	12	0	0
2011	12	9	13	0	0
2011	12	9	14	0	45
2011	12	9	15	0	76
2011	12	9	16	0	204
2011	12	9	17	0	224
2011	12	9	18	0	350
2011	12	9	19	0	555
2011	12	9	20	0	509
2011	12	9	21	0	378
2011	12	9	22	0	216
2011	12	9	23	0	48
2011	12	10	0	0	0
2011	12	10	1	0	0
2011	12	10	2	0	0
2011	12	10	3	0	0
2011	12	10	4	0	0
2011	12	10	5	0	0
2011	12	10	6	0	0
2011	12	10	7	0	0
2011	12	10	8	0	0
2011	12	10	9	0	0
2011	12	10	10	0	0
2011	12	10	11	0	0
2011	12	10	12	0	0
2011	12	10	13	0	0
2011	12	10	14	0	39
2011	12	10	15	0	77
2011	12	10	16	0	208
2011	12	10	17	0	187
2011	12	10	18	0	305
2011	12	10	19	0	215
2011	12	10	20	0	122
2011	12	10	21	0	168
2011	12	10	22	0	67
2011	12	10	23	0	15
2011	12	11	0	0	0
2011	12	11	1	0	0
2011	12	11	2	0	0
2011	12	11	3	0	0
2011	12	11	4	0	0
2011	12	11	5	0	0
2011	12	11	6	0	0
2011	12	11	7	0	0
2011	12	11	8	0	0
2011	12	11	9	0	0
2011	12	11	10	0	0
2011	12	11	11	0	0
2011	12	11	12	0	0
2011	12	11	13	0	0
2011	12	11	14	0	27
2011	12	11	15	0	105
2011	12	11	16	0	224
2011	12	11	17	0	183
2011	12	11	18	0	248
2011	12	11	19	0	403
2011	12	11	20	0	223
2011	12	11	21	0	123
2011	12	11	22	0	153
2011	12	11	23	0	34
2011	12	12	0	0	0
2011	12	12	1	0	0
2011	12	12	2	0	0
2011	12	12	3	0	0
2011	12	12	4	0	0
2011	12	12	5	0	0
2011	12	12	6	0	0
2011	12	12	7	0	0
2011	12	12	8	0	0
2011	12	12	9	0	0
2011	12	12	10	0	0
2011	12	12	11	0	0
2011	12	12	12	0	0
2011	12	12	13	0	0
2011	12	12	14	0	24
2011	12	12	15	0	94
2011	12	12	16	0	62
2011	12	12	17	0	336
2011	12	12	18	0	207
2011	12	12	19	0	425
2011	12	12	20	0	148
2011	12	12	21	0	115
2011	12	12	22	0	150
2011	12	12	23	0	33
2011	12	13	0	0	0
2011	12	13	1	0	0
2011	12	13	2	0	0
2011	12	13	3	0	0
2011	12	13	4	0	0
2011	12	13	5	0	0
2011	12	13	6	0	0
2011	12	13	7	0	0
2011	12	13	8	0	0
2011	12	13	9	0	0
2011	12	13	10	0	0
2011	12	13	11	0	0
2011	12	13	12	0	0
2011	12	13	13	0	0
2011	12	13	14	0	2
2011	12	13	15	0	6
2011	12	13	16	0	13
2011	12	13	17	0	87
2011	12	13	18	0	20
2011	12	13	19	0	72
2011	12	13	20	0	104
2011	12	13	21	0	66
2011	12	13	22	0	98
2011	12	13	23	0	22
2011	12	14	0	0	0
2011	12	14	1	0	0
2011	12	14	2	0	0
2011	12	14	3	0	0
2011	12	14	4	0	0
2011	12	14	5	0	0
2011	12	14	6	0	0
2011	12	14	7	0	0
2011	12	14	8	0	0
2011	12	14	9	0	0
2011	12	14	10	0	0
2011	12	14	11	0	0
2011	12	14	12	0	0
2011	12	14	13	0	0
2011	12	14	14	0	20
2011	12	14	15	0	87
2011	12	14	16	0	115
2011	12	14	17	0	205
2011	12	14	18	0	125
2011	12	14	19	0	104
2011	12	14	20	0	158
2011	12	14	21	0	35
2011	12	14	22	0	102
2011	12	14	23	0	23
2011	12	15	0	0	0
2011	12	15	1	0	0
2011	12	15	2	0	0
2011	12	15	3	0	0
2011	12	15	4	0	0
2011	12	15	5	0	0
2011	12	15	6	0	0
2011	12	15	7	0	0
2011	12	15	8	0	0
2011	12	15	9	0	0
2011	12	15	10	0	0
2011	12	15	11	0	0
2011	12	15	12	0	0
2011	12	15	13	0	0
2011	12	15	14	0	19
2011	12	15	15	0	30
2011	12	15	16	0	12
2011	12	15	17	0	17
2011	12	15	18	0	22
2011	12	15	19	0	169
2011	12	15	20	0	119
2011	12	15	21	0	121
2011	12	15	22	0	4
2011	12	15	23	0	1
2011	12	16	0	0	0
2011	12	16	1	0	0
2011	12	16	2	0	0
2011	12	16	3	0	0
2011	12	16	4	0	0
2011	12	16	5	0	0
2011	12	16	6	0	0
2011	12	16	7	0	0
2011	12	16	8	0	0
2011	12	16	9	0	0
2011	12	16	10	0	0
2011	12	16	11	0	0
2011	12	16	12	0	0
2011	12	16	13	0	0
2011	12	16	14	0	29
2011	12	16	15	0	126
2011	12	16	16	0	133
2011	12	16	17	0	129
2011	12	16	18	0	221
2011	12	16	19	0	226
2011	12	16	20	0	256
2011	12	16	21	0	231
2011	12	16	22	0	121
2011	12	16	23	0	27
2011	12	17	0	0	0
2011	12	17	1	0	0
2011	12	17	2	0	0
2011	12	17	3	0	0
2011	12	17	4	0	0
2011	12	17	5	0	0
2011	12	17	6	0	0
2011	12	17	7	0	0
2011	12	17	8	0	0
2011	12	17	9	0	0
2011	12	17	10	0	0
2011	12	17	11	0	0
2011	12	17	12	0	0
2011	12	17	13	0	0
2011	12	17	14	0	74
2011	12	17	15	0	188
2011	12	17	16	0	231
2011	12	17	17	0	517
2011	12	17	18	0	632
2011	12	17	19	0	630
2011	12	17	20	0	559
2011	12	17	21	0	426
2011	12	17	22	0	247
2011	12	17	23	0	57
2011	12	18	0	0	0
2011	12	18	1	0	0
2011	12	18	2	0	0
2011	12	18	3	0	0
2011	12	18	4	0	0
2011	12	18	5	0	0
2011	12	18	6	0	0
2011	12	18	7	0	0
2011	12	18	8	0	0
2011	12	18	9	0	0
2011	12	18	10	0	0
2011	12	18	11	0	0
2011	12	18	12	0	0
2011	12	18	13	0	0
2011	12	18	14	0	24
2011	12	18	15	0	108
2011	12	18	16	0	114
2011	12	18	17	0	195
2011	12	18	18	0	282
2011	12	18	19	0	379
2011	12	18	20	0	412
2011	12	18	21	0	369
2011	12	18	22	0	218
2011	12	18	23	0	52
2011	12	19	0	0	0
2011	12	19	1	0	0
2011	12	19	2	0	0
2011	12	19	3	0	0
2011	12	19	4	0	0
2011	12	19	5	0	0
2011	12	19	6	0	0
2011	12	19	7	0	0
2011	12	19	8	0	0
2011	12	19	9	0	0
2011	12	19	10	0	0
2011	12	19	11	0	0
2011	12	19	12	0	0
2011	12	19	13	0	0
2011	12	19	14	0	1
2011	12	19	15	0	35
2011	12	19	16	0	63
2011	12	19	17	0	17
2011	12	19	18	0	78
2011	12	19	19	0	96
2011	12	19	20	0	16
2011	12	19	21	0	162
2011	12	19	22	0	106
2011	12	19	23	0	25
2011	12	20	0	0	0
2011	12	20	1	0	0
2011	12	20	2	0	0
2011	12	20	3	0	0
2011	12	20	4	0	0
2011	12	20	5	0	0
2011	12	20	6	0	0
2011	12	20	7	0	0
2011	12	20	8	0	0
2011	12	20	9	0	0
2011	12	20	10	0	0
2011	12	20	11	0	0
2011	12	20	12	0	0
2011	12	20	13	0	0
2011	12	20	14	0	65
2011	12	20	15	0	256
2011	12	20	16	0	403
2011	12	20	17	0	557
2011	12	20	18	0	623
2011	12	20	19	0	548
2011	12	20	20	0	332
2011	12	20	21	0	321
2011	12	20	22	0	209
2011	12	20	23	0	50
2011	12	21	0	0	0
2011	12	21	1	0	0
2011	12	21	2	0	0
2011	12	21	3	0	0
2011	12	21	4	0	0
2011	12	21	5	0	0
2011	12	21	6	0	0
2011	12	21	7	0	0
2011	12	21	8	0	0
2011	12	21	9	0	0
2011	12	21	10	0	0
2011	12	21	11	0	0
2011	12	21	12	0	0
2011	12	21	13	0	0
2011	12	21	14	0	34
2011	12	21	15	0	170
2011	12	21	16	0	123
2011	12	21	17	0	115
2011	12	21	18	0	161
2011	12	21	19	0	134
2011	12	21	20	0	91
2011	12	21	21	0	52
2011	12	21	22	0	112
2011	12	21	23	0	26
2011	12	22	0	0	0
2011	12	22	1	0	0
2011	12	22	2	0	0
2011	12	22	3	0	0
2011	12	22	4	0	0
2011	12	22	5	0	0
2011	12	22	6	0	0
2011	12	22	7	0	0
2011	12	22	8	0	0
2011	12	22	9	0	0
2011	12	22	10	0	0
2011	12	22	11	0	0
2011	12	22	12	0	0
2011	12	22	13	0	0
2011	12	22	14	0	64
2011	12	22	15	0	252
2011	12	22	16	0	426
2011	12	22	17	0	554
2011	12	22	18	0	621
2011	12	22	19	0	621
2011	12	22	20	0	554
2011	12	22	21	0	425
2011	12	22	22	0	250
2011	12	22	23	0	61
2011	12	23	0	0	0
2011	12	23	1	0	0
2011	12	23	2	0	0
2011	12	23	3	0	0
2011	12	23	4	0	0
2011	12	23	5	0	0
2011	12	23	6	0	0
2011	12	23	7	0	0
2011	12	23	8	0	0
2011	12	23	9	0	0
2011	12	23	10	0	0
2011	12	23	11	0	0
2011	12	23	12	0	0
2011	12	23	13	0	0
2011	12	23	14	0	18
2011	12	23	15	0	75
2011	12	23	16	0	85
2011	12	23	17	0	258
2011	12	23	18	0	231
2011	12	23	19	0	230
2011	12	23	20	0	179
2011	12	23	21	0	147
2011	12	23	22	0	137
2011	12	23	23	0	34
2011	12	24	0	0	0
2011	12	24	1	0	0
2011	12	24	2	0	0
2011	12	24	3	0	0
2011	12	24	4	0	0
2011	12	24	5	0	0
2011	12	24	6	0	0
2011	12	24	7	0	0
2011	12	24	8	0	0
2011	12	24	9	0	0
2011	12	24	10	0	0
2011	12	24	11	0	0
2011	12	24	12	0	0
2011	12	24	13	0	0
2011	12	24	14	0	27
2011	12	24	15	0	60
2011	12	24	16	0	61
2011	12	24	17	0	74
2011	12	24	18	0	70
2011	12	24	19	0	18
2011	12	24	20	0	88
2011	12	24	21	0	87
2011	12	24	22	0	56
2011	12	24	23	0	14
2011	12	25	0	0	0
2011	12	25	1	0	0
2011	12	25	2	0	0
2011	12	25	3	0	0
2011	12	25	4	0	0
2011	12	25	5	0	0
2011	12	25	6	0	0
2011	12	25	7	0	0
2011	12	25	8	0	0
2011	12	25	9	0	0
2011	12	25	10	0	0
2011	12	25	11	0	0
2011	12	25	12	0	0
2011	12	25	13	0	0
2011	12	25	14	0	44
2011	12	25	15	0	93
2011	12	25	16	0	138
2011	12	25	17	0	180
2011	12	25	18	0	19
2011	12	25	19	0	165
2011	12	25	20	0	190
2011	12	25	21	0	177
2011	12	25	22	0	155
2011	12	25	23	0	40
2011	12	26	0	0	0
2011	12	26	1	0	0
2011	12	26	2	0	0
2011	12	26	3	0	0
2011	12	26	4	0	0
2011	12	26	5	0	0
2011	12	26	6	0	0
2011	12	26	7	0	0
2011	12	26	8	0	0
2011	12	26	9	0	0
2011	12	26	10	0	0
2011	12	26	11	0	0
2011	12	26	12	0	0
2011	12	26	13	0	0
2011	12	26	14	0	24
2011	12	26	15	0	97
2011	12	26	16	0	202
2011	12	26	17	0	451
2011	12	26	18	0	571
2011	12	26	19	0	632
2011	12	26	20	0	567
2011	12	26	21	0	439
2011	12	26	22	0	263
2011	12	26	23	0	68
2011	12	27	0	0	0
2011	12	27	1	0	0
2011	12	27	2	0	0
2011	12	27	3	0	0
2011	12	27	4	0	0
2011	12	27	5	0	0
2011	12	27	6	0	0
2011	12	27	7	0	0
2011	12	27	8	0	0
2011	12	27	9	0	0
2011	12	27	10	0	0
2011	12	27	11	0	0
2011	12	27	12	0	0
2011	12	27	13	0	0
2011	12	27	14	0	60
2011	12	27	15	0	250
2011	12	27	16	0	427
2011	12	27	17	0	557
2011	12	27	18	0	627
2011	12	27	19	0	629
2011	12	27	20	0	564
2011	12	27	21	0	437
2011	12	27	22	0	262
2011	12	27	23	0	69
2011	12	28	0	0	0
2011	12	28	1	0	0
2011	12	28	2	0	0
2011	12	28	3	0	0
2011	12	28	4	0	0
2011	12	28	5	0	0
2011	12	28	6	0	0
2011	12	28	7	0	0
2011	12	28	8	0	0
2011	12	28	9	0	0
2011	12	28	10	0	0
2011	12	28	11	0	0
2011	12	28	12	0	0
2011	12	28	13	0	0
2011	12	28	14	0	45
2011	12	28	15	0	172
2011	12	28	16	0	190
2011	12	28	17	0	397
2011	12	28	18	0	581
2011	12	28	19	0	631
2011	12	28	20	0	567
2011	12	28	21	0	441
2011	12	28	22	0	266
2011	12	28	23	0	72
2011	12	29	0	0	0
2011	12	29	1	0	0
2011	12	29	2	0	0
2011	12	29	3	0	0
2011	12	29	4	0	0
2011	12	29	5	0	0
2011	12	29	6	0	0
2011	12	29	7	0	0
2011	12	29	8	0	0
2011	12	29	9	0	0
2011	12	29	10	0	0
2011	12	29	11	0	0
2011	12	29	12	0	0
2011	12	29	13	0	0
2011	12	29	14	0	57
2011	12	29	15	0	246
2011	12	29	16	0	423
2011	12	29	17	0	554
2011	12	29	18	0	625
2011	12	29	19	0	629
2011	12	29	20	0	564
2011	12	29	21	0	439
2011	12	29	22	0	264
2011	12	29	23	0	72
2011	12	30	0	0	0
2011	12	30	1	0	0
2011	12	30	2	0	0
2011	12	30	3	0	0
2011	12	30	4	0	0
2011	12	30	5	0	0
2011	12	30	6	0	0
2011	12	30	7	0	0
2011	12	30	8	0	0
2011	12	30	9	0	0
2011	12	30	10	0	0
2011	12	30	11	0	0
2011	12	30	12	0	0
2011	12	30	13	0	0
2011	12	30	14	0	56
2011	12	30	15	0	243
2011	12	30	16	0	419
2011	12	30	17	0	549
2011	12	30	18	0	621
2011	12	30	19	0	624
2011	12	30	20	0	561
2011	12	30	21	0	436
2011	12	30	22	0	263
2011	12	30	23	0	73
2011	12	31	0	0	0
2011	12	31	1	0	0
2011	12	31	2	0	0
2011	12	31	3	0	0
2011	12	31	4	0	0
2011	12	31	5	0	0
2011	12	31	6	0	0
2011	12	31	7	0	0
2011	12	31	8	0	0
2011	12	31	9	0	0
2011	12	31	10	0	0
2011	12	31	11	0	0
2011	12	31	12	0	0
2011	12	31	13	0	0
2011	12	31	14	0	55
2011	12	31	15	0	241
2011	12	31	16	0	418
2011	12	31	17	0	549
2011	12	31	18	0	620
2011	12	31	19	0	624
2011	12	31	20	0	563
2011	12	31	21	0	438
2011	12	31	22	0	266
2011	12	31	23	0	76
2012	1	1	0	0	0
2012	1	1	1	0	0
2012	1	1	2	0	0
2012	1	1	3	0	0
2012	1	1	4	0	0
2012	1	1	5	0	0
2012	1	1	6	0	0
2012	1	1	7	0	0
2012	1	1	8	0	0
2012	1	1	9	0	0
2012	1	1	10	0	0
2012	1	1	11	0	0
2012	1	1	12	0	0
2012	1	1	13	0	0
2012	1	1	14	0	60
2012	1	1	15	0	255
2012	1	1	16	0	437
2012	1	1	17	0	573
2012	1	1	18	0	647
2012	1	1	19	0	654
2012	1	1	20	0	591
2012	1	1	21	0	465
2012	1	1	22	0	289
2012	1	1	23	0	89
2012	1	2	0	0	0
2012	1	2	1	0	0
2012	1	2	2	0	0
2012	1	2	3	0	0
2012	1	2	4	0	0
2012	1	2	5	0	0
2012	1	2	6	0	0
2012	1	2	7	0	0
2012	1	2	8	0	0
2012	1	2	9	0	0
2012	1	2	10	0	0
2012	1	2	11	0	0
2012	1	2	12	0	0
2012	1	2	13	0	0
2012	1	2	14	0	60
2012	1	2	15	0	258
2012	1	2	16	0	442
2012	1	2	17	0	578
2012	1	2	18	0	653
2012	1	2	19	0	659
2012	1	2	20	0	596
2012	1	2	21	0	469
2012	1	2	22	0	293
2012	1	2	23	0	89
2012	1	3	0	0	0
2012	1	3	1	0	0
2012	1	3	2	0	0
2012	1	3	3	0	0
2012	1	3	4	0	0
2012	1	3	5	0	0
2012	1	3	6	0	0
2012	1	3	7	0	0
2012	1	3	8	0	0
2012	1	3	9	0	0
2012	1	3	10	0	0
2012	1	3	11	0	0
2012	1	3	12	0	0
2012	1	3	13	0	0
2012	1	3	14	0	58
2012	1	3	15	0	252
2012	1	3	16	0	433
2012	1	3	17	0	568
2012	1	3	18	0	642
2012	1	3	19	0	647
2012	1	3	20	0	585
2012	1	3	21	0	461
2012	1	3	22	0	287
2012	1	3	23	0	87
2012	1	4	0	0	0
2012	1	4	1	0	0
2012	1	4	2	0	0
2012	1	4	3	0	0
2012	1	4	4	0	0
2012	1	4	5	0	0
2012	1	4	6	0	0
2012	1	4	7	0	0
2012	1	4	8	0	0
2012	1	4	9	0	0
2012	1	4	10	0	0
2012	1	4	11	0	0
2012	1	4	12	0	0
2012	1	4	13	0	0
2012	1	4	14	0	57
2012	1	4	15	0	250
2012	1	4	16	0	431
2012	1	4	17	0	523
2012	1	4	18	0	642
2012	1	4	19	0	648
2012	1	4	20	0	527
2012	1	4	21	0	281
2012	1	4	22	0	290
2012	1	4	23	0	92
2012	1	5	0	0	0
2012	1	5	1	0	0
2012	1	5	2	0	0
2012	1	5	3	0	0
2012	1	5	4	0	0
2012	1	5	5	0	0
2012	1	5	6	0	0
2012	1	5	7	0	0
2012	1	5	8	0	0
2012	1	5	9	0	0
2012	1	5	10	0	0
2012	1	5	11	0	0
2012	1	5	12	0	0
2012	1	5	13	0	0
2012	1	5	14	0	55
2012	1	5	15	0	244
2012	1	5	16	0	398
2012	1	5	17	0	520
2012	1	5	18	0	629
2012	1	5	19	0	635
2012	1	5	20	0	480
2012	1	5	21	0	240
2012	1	5	22	0	226
2012	1	5	23	0	71
2012	1	6	0	0	0
2012	1	6	1	0	0
2012	1	6	2	0	0
2012	1	6	3	0	0
2012	1	6	4	0	0
2012	1	6	5	0	0
2012	1	6	6	0	0
2012	1	6	7	0	0
2012	1	6	8	0	0
2012	1	6	9	0	0
2012	1	6	10	0	0
2012	1	6	11	0	0
2012	1	6	12	0	0
2012	1	6	13	0	0
2012	1	6	14	0	53
2012	1	6	15	0	240
2012	1	6	16	0	419
2012	1	6	17	0	552
2012	1	6	18	0	626
2012	1	6	19	0	634
2012	1	6	20	0	575
2012	1	6	21	0	454
2012	1	6	22	0	284
2012	1	6	23	0	91
2012	1	7	0	0	0
2012	1	7	1	0	0
2012	1	7	2	0	0
2012	1	7	3	0	0
2012	1	7	4	0	0
2012	1	7	5	0	0
2012	1	7	6	0	0
2012	1	7	7	0	0
2012	1	7	8	0	0
2012	1	7	9	0	0
2012	1	7	10	0	0
2012	1	7	11	0	0
2012	1	7	12	0	0
2012	1	7	13	0	0
2012	1	7	14	0	54
2012	1	7	15	0	244
2012	1	7	16	0	424
2012	1	7	17	0	560
2012	1	7	18	0	635
2012	1	7	19	0	645
2012	1	7	20	0	585
2012	1	7	21	0	464
2012	1	7	22	0	293
2012	1	7	23	0	95
2012	1	8	0	0	0
2012	1	8	1	0	0
2012	1	8	2	0	0
2012	1	8	3	0	0
2012	1	8	4	0	0
2012	1	8	5	0	0
2012	1	8	6	0	0
2012	1	8	7	0	0
2012	1	8	8	0	0
2012	1	8	9	0	0
2012	1	8	10	0	0
2012	1	8	11	0	0
2012	1	8	12	0	0
2012	1	8	13	0	0
2012	1	8	14	0	5
2012	1	8	15	0	40
2012	1	8	16	0	103
2012	1	8	17	0	126
2012	1	8	18	0	205
2012	1	8	19	0	154
2012	1	8	20	0	256
2012	1	8	21	0	171
2012	1	8	22	0	96
2012	1	8	23	0	32
2012	1	9	0	0	0
2012	1	9	1	0	0
2012	1	9	2	0	0
2012	1	9	3	0	0
2012	1	9	4	0	0
2012	1	9	5	0	0
2012	1	9	6	0	0
2012	1	9	7	0	0
2012	1	9	8	0	0
2012	1	9	9	0	0
2012	1	9	10	0	0
2012	1	9	11	0	0
2012	1	9	12	0	0
2012	1	9	13	0	0
2012	1	9	14	0	1
2012	1	9	15	0	19
2012	1	9	16	0	60
2012	1	9	17	0	18
2012	1	9	18	0	84
2012	1	9	19	0	27
2012	1	9	20	0	20
2012	1	9	21	0	81
2012	1	9	22	0	150
2012	1	9	23	0	50
2012	1	10	0	0	0
2012	1	10	1	0	0
2012	1	10	2	0	0
2012	1	10	3	0	0
2012	1	10	4	0	0
2012	1	10	5	0	0
2012	1	10	6	0	0
2012	1	10	7	0	0
2012	1	10	8	0	0
2012	1	10	9	0	0
2012	1	10	10	0	0
2012	1	10	11	0	0
2012	1	10	12	0	0
2012	1	10	13	0	0
2012	1	10	14	0	27
2012	1	10	15	0	150
2012	1	10	16	0	355
2012	1	10	17	0	411
2012	1	10	18	0	645
2012	1	10	19	0	506
2012	1	10	20	0	361
2012	1	10	21	0	439
2012	1	10	22	0	279
2012	1	10	23	0	95
2012	1	11	0	0	0
2012	1	11	1	0	0
2012	1	11	2	0	0
2012	1	11	3	0	0
2012	1	11	4	0	0
2012	1	11	5	0	0
2012	1	11	6	0	0
2012	1	11	7	0	0
2012	1	11	8	0	0
2012	1	11	9	0	0
2012	1	11	10	0	0
2012	1	11	11	0	0
2012	1	11	12	0	0
2012	1	11	13	0	0
2012	1	11	14	0	54
2012	1	11	15	0	248
2012	1	11	16	0	433
2012	1	11	17	0	571
2012	1	11	18	0	650
2012	1	11	19	0	660
2012	1	11	20	0	602
2012	1	11	21	0	481
2012	1	11	22	0	307
2012	1	11	23	0	107
2012	1	12	0	0	0
2012	1	12	1	0	0
2012	1	12	2	0	0
2012	1	12	3	0	0
2012	1	12	4	0	0
2012	1	12	5	0	0
2012	1	12	6	0	0
2012	1	12	7	0	0
2012	1	12	8	0	0
2012	1	12	9	0	0
2012	1	12	10	0	0
2012	1	12	11	0	0
2012	1	12	12	0	0
2012	1	12	13	0	0
2012	1	12	14	0	28
2012	1	12	15	0	93
2012	1	12	16	0	421
2012	1	12	17	0	565
2012	1	12	18	0	640
2012	1	12	19	0	564
2012	1	12	20	0	169
2012	1	12	21	0	354
2012	1	12	22	0	178
2012	1	12	23	0	63
2012	1	13	0	0	0
2012	1	13	1	0	0
2012	1	13	2	0	0
2012	1	13	3	0	0
2012	1	13	4	0	0
2012	1	13	5	0	0
2012	1	13	6	0	0
2012	1	13	7	0	0
2012	1	13	8	0	0
2012	1	13	9	0	0
2012	1	13	10	0	0
2012	1	13	11	0	0
2012	1	13	12	0	0
2012	1	13	13	0	0
2012	1	13	14	0	47
2012	1	13	15	0	231
2012	1	13	16	0	420
2012	1	13	17	0	546
2012	1	13	18	0	577
2012	1	13	19	0	684
2012	1	13	20	0	626
2012	1	13	21	0	502
2012	1	13	22	0	324
2012	1	13	23	0	116
2012	1	14	0	0	0
2012	1	14	1	0	0
2012	1	14	2	0	0
2012	1	14	3	0	0
2012	1	14	4	0	0
2012	1	14	5	0	0
2012	1	14	6	0	0
2012	1	14	7	0	0
2012	1	14	8	0	0
2012	1	14	9	0	0
2012	1	14	10	0	0
2012	1	14	11	0	0
2012	1	14	12	0	0
2012	1	14	13	0	0
2012	1	14	14	0	57
2012	1	14	15	0	256
2012	1	14	16	0	446
2012	1	14	17	0	587
2012	1	14	18	0	668
2012	1	14	19	0	680
2012	1	14	20	0	621
2012	1	14	21	0	499
2012	1	14	22	0	322
2012	1	14	23	0	116
2012	1	15	0	0	0
2012	1	15	1	0	0
2012	1	15	2	0	0
2012	1	15	3	0	0
2012	1	15	4	0	0
2012	1	15	5	0	0
2012	1	15	6	0	0
2012	1	15	7	0	0
2012	1	15	8	0	0
2012	1	15	9	0	0
2012	1	15	10	0	0
2012	1	15	11	0	0
2012	1	15	12	0	0
2012	1	15	13	0	0
2012	1	15	14	0	37
2012	1	15	15	0	232
2012	1	15	16	0	427
2012	1	15	17	0	563
2012	1	15	18	0	297
2012	1	15	19	0	366
2012	1	15	20	0	238
2012	1	15	21	0	194
2012	1	15	22	0	276
2012	1	15	23	0	50
2012	1	16	0	0	0
2012	1	16	1	0	0
2012	1	16	2	0	0
2012	1	16	3	0	0
2012	1	16	4	0	0
2012	1	16	5	0	0
2012	1	16	6	0	0
2012	1	16	7	0	0
2012	1	16	8	0	0
2012	1	16	9	0	0
2012	1	16	10	0	0
2012	1	16	11	0	0
2012	1	16	12	0	0
2012	1	16	13	0	0
2012	1	16	14	0	9
2012	1	16	15	0	37
2012	1	16	16	0	87
2012	1	16	17	0	52
2012	1	16	18	0	20
2012	1	16	19	0	244
2012	1	16	20	0	329
2012	1	16	21	0	306
2012	1	16	22	0	68
2012	1	16	23	0	89
2012	1	17	0	0	0
2012	1	17	1	0	0
2012	1	17	2	0	0
2012	1	17	3	0	0
2012	1	17	4	0	0
2012	1	17	5	0	0
2012	1	17	6	0	0
2012	1	17	7	0	0
2012	1	17	8	0	0
2012	1	17	9	0	0
2012	1	17	10	0	0
2012	1	17	11	0	0
2012	1	17	12	0	0
2012	1	17	13	0	0
2012	1	17	14	0	57
2012	1	17	15	0	253
2012	1	17	16	0	440
2012	1	17	17	0	583
2012	1	17	18	0	666
2012	1	17	19	0	628
2012	1	17	20	0	560
2012	1	17	21	0	461
2012	1	17	22	0	332
2012	1	17	23	0	127
2012	1	18	0	0	0
2012	1	18	1	0	0
2012	1	18	2	0	0
2012	1	18	3	0	0
2012	1	18	4	0	0
2012	1	18	5	0	0
2012	1	18	6	0	0
2012	1	18	7	0	0
2012	1	18	8	0	0
2012	1	18	9	0	0
2012	1	18	10	0	0
2012	1	18	11	0	0
2012	1	18	12	0	0
2012	1	18	13	0	0
2012	1	18	14	0	57
2012	1	18	15	0	255
2012	1	18	16	0	441
2012	1	18	17	0	583
2012	1	18	18	0	664
2012	1	18	19	0	677
2012	1	18	20	0	620
2012	1	18	21	0	500
2012	1	18	22	0	327
2012	1	18	23	0	125
2012	1	19	0	0	0
2012	1	19	1	0	0
2012	1	19	2	0	0
2012	1	19	3	0	0
2012	1	19	4	0	0
2012	1	19	5	0	0
2012	1	19	6	0	0
2012	1	19	7	0	0
2012	1	19	8	0	0
2012	1	19	9	0	0
2012	1	19	10	0	0
2012	1	19	11	0	0
2012	1	19	12	0	0
2012	1	19	13	0	0
2012	1	19	14	0	52
2012	1	19	15	0	231
2012	1	19	16	0	414
2012	1	19	17	0	566
2012	1	19	18	0	612
2012	1	19	19	0	657
2012	1	19	20	0	603
2012	1	19	21	0	486
2012	1	19	22	0	302
2012	1	19	23	0	121
2012	1	20	0	0	0
2012	1	20	1	0	0
2012	1	20	2	0	0
2012	1	20	3	0	0
2012	1	20	4	0	0
2012	1	20	5	0	0
2012	1	20	6	0	0
2012	1	20	7	0	0
2012	1	20	8	0	0
2012	1	20	9	0	0
2012	1	20	10	0	0
2012	1	20	11	0	0
2012	1	20	12	0	0
2012	1	20	13	0	0
2012	1	20	14	0	13
2012	1	20	15	0	13
2012	1	20	16	0	130
2012	1	20	17	0	141
2012	1	20	18	0	246
2012	1	20	19	0	415
2012	1	20	20	0	382
2012	1	20	21	0	495
2012	1	20	22	0	326
2012	1	20	23	0	128
2012	1	21	0	0	0
2012	1	21	1	0	0
2012	1	21	2	0	0
2012	1	21	3	0	0
2012	1	21	4	0	0
2012	1	21	5	0	0
2012	1	21	6	0	0
2012	1	21	7	0	0
2012	1	21	8	0	0
2012	1	21	9	0	0
2012	1	21	10	0	0
2012	1	21	11	0	0
2012	1	21	12	0	0
2012	1	21	13	0	0
2012	1	21	14	0	41
2012	1	21	15	0	178
2012	1	21	16	0	293
2012	1	21	17	0	470
2012	1	21	18	0	642
2012	1	21	19	0	670
2012	1	21	20	0	616
2012	1	21	21	0	466
2012	1	21	22	0	318
2012	1	21	23	0	125
2012	1	22	0	0	0
2012	1	22	1	0	0
2012	1	22	2	0	0
2012	1	22	3	0	0
2012	1	22	4	0	0
2012	1	22	5	0	0
2012	1	22	6	0	0
2012	1	22	7	0	0
2012	1	22	8	0	0
2012	1	22	9	0	0
2012	1	22	10	0	0
2012	1	22	11	0	0
2012	1	22	12	0	0
2012	1	22	13	0	0
2012	1	22	14	0	30
2012	1	22	15	0	103
2012	1	22	16	0	120
2012	1	22	17	0	66
2012	1	22	18	0	103
2012	1	22	19	0	241
2012	1	22	20	0	450
2012	1	22	21	0	518
2012	1	22	22	0	346
2012	1	22	23	0	139
2012	1	23	0	0	0
2012	1	23	1	0	0
2012	1	23	2	0	0
2012	1	23	3	0	0
2012	1	23	4	0	0
2012	1	23	5	0	0
2012	1	23	6	0	0
2012	1	23	7	0	0
2012	1	23	8	0	0
2012	1	23	9	0	0
2012	1	23	10	0	0
2012	1	23	11	0	0
2012	1	23	12	0	0
2012	1	23	13	0	0
2012	1	23	14	0	59
2012	1	23	15	0	243
2012	1	23	16	0	426
2012	1	23	17	0	473
2012	1	23	18	0	624
2012	1	23	19	0	695
2012	1	23	20	0	640
2012	1	23	21	0	520
2012	1	23	22	0	347
2012	1	23	23	0	141
2012	1	24	0	0	0
2012	1	24	1	0	0
2012	1	24	2	0	0
2012	1	24	3	0	0
2012	1	24	4	0	0
2012	1	24	5	0	0
2012	1	24	6	0	0
2012	1	24	7	0	0
2012	1	24	8	0	0
2012	1	24	9	0	0
2012	1	24	10	0	0
2012	1	24	11	0	0
2012	1	24	12	0	0
2012	1	24	13	0	0
2012	1	24	14	0	14
2012	1	24	15	0	52
2012	1	24	16	0	132
2012	1	24	17	0	141
2012	1	24	18	0	104
2012	1	24	19	0	25
2012	1	24	20	0	19
2012	1	24	21	0	14
2012	1	24	22	0	99
2012	1	24	23	0	92
2012	1	25	0	0	0
2012	1	25	1	0	0
2012	1	25	2	0	0
2012	1	25	3	0	0
2012	1	25	4	0	0
2012	1	25	5	0	0
2012	1	25	6	0	0
2012	1	25	7	0	0
2012	1	25	8	0	0
2012	1	25	9	0	0
2012	1	25	10	0	0
2012	1	25	11	0	0
2012	1	25	12	0	0
2012	1	25	13	0	0
2012	1	25	14	0	13
2012	1	25	15	0	117
2012	1	25	16	0	119
2012	1	25	17	0	157
2012	1	25	18	0	169
2012	1	25	19	0	156
2012	1	25	20	0	167
2012	1	25	21	0	108
2012	1	25	22	0	214
2012	1	25	23	0	91
2012	1	26	0	0	0
2012	1	26	1	0	0
2012	1	26	2	0	0
2012	1	26	3	0	0
2012	1	26	4	0	0
2012	1	26	5	0	0
2012	1	26	6	0	0
2012	1	26	7	0	0
2012	1	26	8	0	0
2012	1	26	9	0	0
2012	1	26	10	0	0
2012	1	26	11	0	0
2012	1	26	12	0	0
2012	1	26	13	0	0
2012	1	26	14	0	66
2012	1	26	15	0	267
2012	1	26	16	0	458
2012	1	26	17	0	605
2012	1	26	18	0	689
2012	1	26	19	0	705
2012	1	26	20	0	651
2012	1	26	21	0	532
2012	1	26	22	0	359
2012	1	26	23	0	152
2012	1	27	0	0	0
2012	1	27	1	0	0
2012	1	27	2	0	0
2012	1	27	3	0	0
2012	1	27	4	0	0
2012	1	27	5	0	0
2012	1	27	6	0	0
2012	1	27	7	0	0
2012	1	27	8	0	0
2012	1	27	9	0	0
2012	1	27	10	0	0
2012	1	27	11	0	0
2012	1	27	12	0	0
2012	1	27	13	0	0
2012	1	27	14	0	67
2012	1	27	15	0	271
2012	1	27	16	0	464
2012	1	27	17	0	610
2012	1	27	18	0	696
2012	1	27	19	0	713
2012	1	27	20	0	659
2012	1	27	21	0	539
2012	1	27	22	0	365
2012	1	27	23	0	155
2012	1	28	0	0	0
2012	1	28	1	0	0
2012	1	28	2	0	0
2012	1	28	3	0	0
2012	1	28	4	0	0
2012	1	28	5	0	0
2012	1	28	6	0	0
2012	1	28	7	0	0
2012	1	28	8	0	0
2012	1	28	9	0	0
2012	1	28	10	0	0
2012	1	28	11	0	0
2012	1	28	12	0	0
2012	1	28	13	0	0
2012	1	28	14	0	70
2012	1	28	15	0	278
2012	1	28	16	0	473
2012	1	28	17	0	623
2012	1	28	18	0	681
2012	1	28	19	0	696
2012	1	28	20	0	674
2012	1	28	21	0	506
2012	1	28	22	0	376
2012	1	28	23	0	152
2012	1	29	0	0	0
2012	1	29	1	0	0
2012	1	29	2	0	0
2012	1	29	3	0	0
2012	1	29	4	0	0
2012	1	29	5	0	0
2012	1	29	6	0	0
2012	1	29	7	0	0
2012	1	29	8	0	0
2012	1	29	9	0	0
2012	1	29	10	0	0
2012	1	29	11	0	0
2012	1	29	12	0	0
2012	1	29	13	0	0
2012	1	29	14	0	72
2012	1	29	15	0	280
2012	1	29	16	0	475
2012	1	29	17	0	624
2012	1	29	18	0	711
2012	1	29	19	0	727
2012	1	29	20	0	673
2012	1	29	21	0	552
2012	1	29	22	0	375
2012	1	29	23	0	165
2012	1	30	0	0	0
2012	1	30	1	0	0
2012	1	30	2	0	0
2012	1	30	3	0	0
2012	1	30	4	0	0
2012	1	30	5	0	0
2012	1	30	6	0	0
2012	1	30	7	0	0
2012	1	30	8	0	0
2012	1	30	9	0	0
2012	1	30	10	0	0
2012	1	30	11	0	0
2012	1	30	12	0	0
2012	1	30	13	0	0
2012	1	30	14	0	70
2012	1	30	15	0	209
2012	1	30	16	0	460
2012	1	30	17	0	276
2012	1	30	18	0	158
2012	1	30	19	0	540
2012	1	30	20	0	125
2012	1	30	21	0	133
2012	1	30	22	0	171
2012	1	30	23	0	120
2012	1	31	0	0	0
2012	1	31	1	0	0
2012	1	31	2	0	0
2012	1	31	3	0	0
2012	1	31	4	0	0
2012	1	31	5	0	0
2012	1	31	6	0	0
2012	1	31	7	0	0
2012	1	31	8	0	0
2012	1	31	9	0	0
2012	1	31	10	0	0
2012	1	31	11	0	0
2012	1	31	12	0	0
2012	1	31	13	0	0
2012	1	31	14	0	15
2012	1	31	15	0	70
2012	1	31	16	0	29
2012	1	31	17	0	336
2012	1	31	18	0	491
2012	1	31	19	0	444
2012	1	31	20	0	492
2012	1	31	21	0	532
2012	1	31	22	0	363
2012	1	31	23	0	135
2012	2	1	0	0	0
2012	2	1	1	0	0
2012	2	1	2	0	0
2012	2	1	3	0	0
2012	2	1	4	0	0
2012	2	1	5	0	0
2012	2	1	6	0	0
2012	2	1	7	0	0
2012	2	1	8	0	0
2012	2	1	9	0	0
2012	2	1	10	0	0
2012	2	1	11	0	0
2012	2	1	12	0	0
2012	2	1	13	0	0
2012	2	1	14	0	19
2012	2	1	15	0	59
2012	2	1	16	0	397
2012	2	1	17	0	607
2012	2	1	18	0	488
2012	2	1	19	0	709
2012	2	1	20	0	656
2012	2	1	21	0	541
2012	2	1	22	0	370
2012	2	1	23	0	167
2012	2	2	0	0	0
2012	2	2	1	0	0
2012	2	2	2	0	0
2012	2	2	3	0	0
2012	2	2	4	0	0
2012	2	2	5	0	0
2012	2	2	6	0	0
2012	2	2	7	0	0
2012	2	2	8	0	0
2012	2	2	9	0	0
2012	2	2	10	0	0
2012	2	2	11	0	0
2012	2	2	12	0	0
2012	2	2	13	0	0
2012	2	2	14	0	32
2012	2	2	15	0	86
2012	2	2	16	0	155
2012	2	2	17	0	120
2012	2	2	18	0	273
2012	2	2	19	0	270
2012	2	2	20	0	295
2012	2	2	21	0	66
2012	2	2	22	0	228
2012	2	2	23	0	151
2012	2	3	0	0	0
2012	2	3	1	0	0
2012	2	3	2	0	0
2012	2	3	3	0	0
2012	2	3	4	0	0
2012	2	3	5	0	0
2012	2	3	6	0	0
2012	2	3	7	0	0
2012	2	3	8	0	0
2012	2	3	9	0	0
2012	2	3	10	0	0
2012	2	3	11	0	0
2012	2	3	12	0	0
2012	2	3	13	0	0
2012	2	3	14	0	12
2012	2	3	15	0	76
2012	2	3	16	0	152
2012	2	3	17	0	61
2012	2	3	18	0	377
2012	2	3	19	0	143
2012	2	3	20	0	195
2012	2	3	21	0	423
2012	2	3	22	0	177
2012	2	3	23	0	132
2012	2	4	0	0	0
2012	2	4	1	0	0
2012	2	4	2	0	0
2012	2	4	3	0	0
2012	2	4	4	0	0
2012	2	4	5	0	0
2012	2	4	6	0	0
2012	2	4	7	0	0
2012	2	4	8	0	0
2012	2	4	9	0	0
2012	2	4	10	0	0
2012	2	4	11	0	0
2012	2	4	12	0	0
2012	2	4	13	0	0
2012	2	4	14	0	2
2012	2	4	15	0	100
2012	2	4	16	0	256
2012	2	4	17	0	147
2012	2	4	18	0	676
2012	2	4	19	0	247
2012	2	4	20	0	315
2012	2	4	21	0	531
2012	2	4	22	0	180
2012	2	4	23	0	187
2012	2	5	0	0	0
2012	2	5	1	0	0
2012	2	5	2	0	0
2012	2	5	3	0	0
2012	2	5	4	0	0
2012	2	5	5	0	0
2012	2	5	6	0	0
2012	2	5	7	0	0
2012	2	5	8	0	0
2012	2	5	9	0	0
2012	2	5	10	0	0
2012	2	5	11	0	0
2012	2	5	12	0	0
2012	2	5	13	0	0
2012	2	5	14	0	21
2012	2	5	15	0	89
2012	2	5	16	0	111
2012	2	5	17	0	228
2012	2	5	18	0	168
2012	2	5	19	0	214
2012	2	5	20	0	320
2012	2	5	21	0	183
2012	2	5	22	0	206
2012	2	5	23	0	90
2012	2	6	0	0	0
2012	2	6	1	0	0
2012	2	6	2	0	0
2012	2	6	3	0	0
2012	2	6	4	0	0
2012	2	6	5	0	0
2012	2	6	6	0	0
2012	2	6	7	0	0
2012	2	6	8	0	0
2012	2	6	9	0	0
2012	2	6	10	0	0
2012	2	6	11	0	0
2012	2	6	12	0	0
2012	2	6	13	0	0
2012	2	6	14	0	54
2012	2	6	15	0	239
2012	2	6	16	0	206
2012	2	6	17	0	419
2012	2	6	18	0	488
2012	2	6	19	0	491
2012	2	6	20	0	25
2012	2	6	21	0	79
2012	2	6	22	0	263
2012	2	6	23	0	197
2012	2	7	0	0	0
2012	2	7	1	0	0
2012	2	7	2	0	0
2012	2	7	3	0	0
2012	2	7	4	0	0
2012	2	7	5	0	0
2012	2	7	6	0	0
2012	2	7	7	0	0
2012	2	7	8	0	0
2012	2	7	9	0	0
2012	2	7	10	0	0
2012	2	7	11	0	0
2012	2	7	12	0	0
2012	2	7	13	0	0
2012	2	7	14	0	93
2012	2	7	15	0	308
2012	2	7	16	0	507
2012	2	7	17	0	457
2012	2	7	18	0	746
2012	2	7	19	0	764
2012	2	7	20	0	710
2012	2	7	21	0	590
2012	2	7	22	0	413
2012	2	7	23	0	199
2012	2	8	0	0	0
2012	2	8	1	0	0
2012	2	8	2	0	0
2012	2	8	3	0	0
2012	2	8	4	0	0
2012	2	8	5	0	0
2012	2	8	6	0	0
2012	2	8	7	0	0
2012	2	8	8	0	0
2012	2	8	9	0	0
2012	2	8	10	0	0
2012	2	8	11	0	0
2012	2	8	12	0	0
2012	2	8	13	0	0
2012	2	8	14	0	62
2012	2	8	15	0	214
2012	2	8	16	0	426
2012	2	8	17	0	496
2012	2	8	18	0	617
2012	2	8	19	0	677
2012	2	8	20	0	495
2012	2	8	21	0	553
2012	2	8	22	0	345
2012	2	8	23	0	203
2012	2	9	0	0	0
2012	2	9	1	0	0
2012	2	9	2	0	0
2012	2	9	3	0	0
2012	2	9	4	0	0
2012	2	9	5	0	0
2012	2	9	6	0	0
2012	2	9	7	0	0
2012	2	9	8	0	0
2012	2	9	9	0	0
2012	2	9	10	0	0
2012	2	9	11	0	0
2012	2	9	12	0	0
2012	2	9	13	0	0
2012	2	9	14	0	98
2012	2	9	15	0	315
2012	2	9	16	0	470
2012	2	9	17	0	612
2012	2	9	18	0	631
2012	2	9	19	0	583
2012	2	9	20	0	461
2012	2	9	21	0	210
2012	2	9	22	0	226
2012	2	9	23	0	85
2012	2	10	0	0	0
2012	2	10	1	0	0
2012	2	10	2	0	0
2012	2	10	3	0	0
2012	2	10	4	0	0
2012	2	10	5	0	0
2012	2	10	6	0	0
2012	2	10	7	0	0
2012	2	10	8	0	0
2012	2	10	9	0	0
2012	2	10	10	0	0
2012	2	10	11	0	0
2012	2	10	12	0	0
2012	2	10	13	0	0
2012	2	10	14	0	49
2012	2	10	15	0	7
2012	2	10	16	0	340
2012	2	10	17	0	88
2012	2	10	18	0	572
2012	2	10	19	0	788
2012	2	10	20	0	734
2012	2	10	21	0	613
2012	2	10	22	0	433
2012	2	10	23	0	215
2012	2	11	0	0	0
2012	2	11	1	0	0
2012	2	11	2	0	0
2012	2	11	3	0	0
2012	2	11	4	0	0
2012	2	11	5	0	0
2012	2	11	6	0	0
2012	2	11	7	0	0
2012	2	11	8	0	0
2012	2	11	9	0	0
2012	2	11	10	0	0
2012	2	11	11	0	0
2012	2	11	12	0	0
2012	2	11	13	0	0
2012	2	11	14	0	108
2012	2	11	15	0	334
2012	2	11	16	0	540
2012	2	11	17	0	696
2012	2	11	18	0	788
2012	2	11	19	0	808
2012	2	11	20	0	754
2012	2	11	21	0	632
2012	2	11	22	0	449
2012	2	11	23	0	226
2012	2	12	0	0	0
2012	2	12	1	0	0
2012	2	12	2	0	0
2012	2	12	3	0	0
2012	2	12	4	0	0
2012	2	12	5	0	0
2012	2	12	6	0	0
2012	2	12	7	0	0
2012	2	12	8	0	0
2012	2	12	9	0	0
2012	2	12	10	0	0
2012	2	12	11	0	0
2012	2	12	12	0	0
2012	2	12	13	0	0
2012	2	12	14	0	77
2012	2	12	15	0	197
2012	2	12	16	0	368
2012	2	12	17	0	578
2012	2	12	18	0	242
2012	2	12	19	0	23
2012	2	12	20	0	307
2012	2	12	21	0	207
2012	2	12	22	0	249
2012	2	12	23	0	142
2012	2	13	0	0	0
2012	2	13	1	0	0
2012	2	13	2	0	0
2012	2	13	3	0	0
2012	2	13	4	0	0
2012	2	13	5	0	0
2012	2	13	6	0	0
2012	2	13	7	0	0
2012	2	13	8	0	0
2012	2	13	9	0	0
2012	2	13	10	0	0
2012	2	13	11	0	0
2012	2	13	12	0	0
2012	2	13	13	0	0
2012	2	13	14	0	2
2012	2	13	15	0	175
2012	2	13	16	0	232
2012	2	13	17	0	275
2012	2	13	18	0	418
2012	2	13	19	0	330
2012	2	13	20	0	726
2012	2	13	21	0	605
2012	2	13	22	0	430
2012	2	13	23	0	216
2012	2	14	0	0	0
2012	2	14	1	0	0
2012	2	14	2	0	0
2012	2	14	3	0	0
2012	2	14	4	0	0
2012	2	14	5	0	0
2012	2	14	6	0	0
2012	2	14	7	0	0
2012	2	14	8	0	0
2012	2	14	9	0	0
2012	2	14	10	0	0
2012	2	14	11	0	0
2012	2	14	12	0	0
2012	2	14	13	0	0
2012	2	14	14	0	109
2012	2	14	15	0	323
2012	2	14	16	0	519
2012	2	14	17	0	668
2012	2	14	18	0	755
2012	2	14	19	0	772
2012	2	14	20	0	719
2012	2	14	21	0	600
2012	2	14	22	0	308
2012	2	14	23	0	162
2012	2	15	0	0	0
2012	2	15	1	0	0
2012	2	15	2	0	0
2012	2	15	3	0	0
2012	2	15	4	0	0
2012	2	15	5	0	0
2012	2	15	6	0	0
2012	2	15	7	0	0
2012	2	15	8	0	0
2012	2	15	9	0	0
2012	2	15	10	0	0
2012	2	15	11	0	0
2012	2	15	12	0	0
2012	2	15	13	0	0
2012	2	15	14	0	70
2012	2	15	15	0	161
2012	2	15	16	0	323
2012	2	15	17	0	530
2012	2	15	18	0	756
2012	2	15	19	0	721
2012	2	15	20	0	645
2012	2	15	21	0	447
2012	2	15	22	0	429
2012	2	15	23	0	218
2012	2	16	0	0	0
2012	2	16	1	0	0
2012	2	16	2	0	0
2012	2	16	3	0	0
2012	2	16	4	0	0
2012	2	16	5	0	0
2012	2	16	6	0	0
2012	2	16	7	0	0
2012	2	16	8	0	0
2012	2	16	9	0	0
2012	2	16	10	0	0
2012	2	16	11	0	0
2012	2	16	12	0	0
2012	2	16	13	0	0
2012	2	16	14	0	70
2012	2	16	15	0	10
2012	2	16	16	0	190
2012	2	16	17	0	419
2012	2	16	18	0	452
2012	2	16	19	0	420
2012	2	16	20	0	480
2012	2	16	21	0	461
2012	2	16	22	0	250
2012	2	16	23	0	89
2012	2	17	0	0	0
2012	2	17	1	0	0
2012	2	17	2	0	0
2012	2	17	3	0	0
2012	2	17	4	0	0
2012	2	17	5	0	0
2012	2	17	6	0	0
2012	2	17	7	0	0
2012	2	17	8	0	0
2012	2	17	9	0	0
2012	2	17	10	0	0
2012	2	17	11	0	0
2012	2	17	12	0	0
2012	2	17	13	0	0
2012	2	17	14	0	17
2012	2	17	15	0	88
2012	2	17	16	0	201
2012	2	17	17	0	126
2012	2	17	18	0	157
2012	2	17	19	0	178
2012	2	17	20	0	65
2012	2	17	21	0	76
2012	2	17	22	0	134
2012	2	17	23	0	147
2012	2	18	0	0	0
2012	2	18	1	0	0
2012	2	18	2	0	0
2012	2	18	3	0	0
2012	2	18	4	0	0
2012	2	18	5	0	0
2012	2	18	6	0	0
2012	2	18	7	0	0
2012	2	18	8	0	0
2012	2	18	9	0	0
2012	2	18	10	0	0
2012	2	18	11	0	0
2012	2	18	12	0	0
2012	2	18	13	0	0
2012	2	18	14	0	2
2012	2	18	15	0	103
2012	2	18	16	0	105
2012	2	18	17	0	130
2012	2	18	18	0	21
2012	2	18	19	0	160
2012	2	18	20	0	137
2012	2	18	21	0	86
2012	2	18	22	0	13
2012	2	18	23	0	148
2012	2	19	0	0	0
2012	2	19	1	0	0
2012	2	19	2	0	0
2012	2	19	3	0	0
2012	2	19	4	0	0
2012	2	19	5	0	0
2012	2	19	6	0	0
2012	2	19	7	0	0
2012	2	19	8	0	0
2012	2	19	9	0	0
2012	2	19	10	0	0
2012	2	19	11	0	0
2012	2	19	12	0	0
2012	2	19	13	0	0
2012	2	19	14	0	128
2012	2	19	15	0	175
2012	2	19	16	0	546
2012	2	19	17	0	696
2012	2	19	18	0	784
2012	2	19	19	0	760
2012	2	19	20	0	747
2012	2	19	21	0	564
2012	2	19	22	0	397
2012	2	19	23	0	215
2012	2	20	0	0	0
2012	2	20	1	0	0
2012	2	20	2	0	0
2012	2	20	3	0	0
2012	2	20	4	0	0
2012	2	20	5	0	0
2012	2	20	6	0	0
2012	2	20	7	0	0
2012	2	20	8	0	0
2012	2	20	9	0	0
2012	2	20	10	0	0
2012	2	20	11	0	0
2012	2	20	12	0	0
2012	2	20	13	0	0
2012	2	20	14	0	84
2012	2	20	15	0	58
2012	2	20	16	0	18
2012	2	20	17	0	180
2012	2	20	18	0	554
2012	2	20	19	0	802
2012	2	20	20	0	748
2012	2	20	21	0	627
2012	2	20	22	0	451
2012	2	20	23	0	236
2012	2	21	0	0	0
2012	2	21	1	0	0
2012	2	21	2	0	0
2012	2	21	3	0	0
2012	2	21	4	0	0
2012	2	21	5	0	0
2012	2	21	6	0	0
2012	2	21	7	0	0
2012	2	21	8	0	0
2012	2	21	9	0	0
2012	2	21	10	0	0
2012	2	21	11	0	0
2012	2	21	12	0	0
2012	2	21	13	0	0
2012	2	21	14	0	61
2012	2	21	15	0	353
2012	2	21	16	0	551
2012	2	21	17	0	701
2012	2	21	18	0	788
2012	2	21	19	0	806
2012	2	21	20	0	752
2012	2	21	21	0	631
2012	2	21	22	0	455
2012	2	21	23	0	241
2012	2	22	0	0	0
2012	2	22	1	0	0
2012	2	22	2	0	0
2012	2	22	3	0	0
2012	2	22	4	0	0
2012	2	22	5	0	0
2012	2	22	6	0	0
[truncated: 7,505 more rows]
