# Supplementary material
Source: MDPI journal article supplement (https://www.mdpi.com/2073-4336/8/4/45)
Supplement: s1 [file s1 › Part 2 - Data Analysis/Joint Generation (Interconnection)/jointgen_analysis.xlsx]

## Sheet: Microgrid
t	load_summer	P_summer	net_summer	MG_summer	MG_summer	out(2)	in(2)	storage_out	ess(2)
0	0.602043	0	0.602043	0.6	0.6	0	0	0	0
1	0.516191	0	0.516191	0.52	0.52	0	0	0	0
2	0.463113	0	0.463113	0.46	0.46	0	0	0	0
3	0.430021	0	0.430021	0.43	0.43	0	0	0	0
4	0.403615	0	0.403615	0.4	0.4	0	0	0	0
5	0.381108	0	0.381108	0.38	0.38	0	0	0	0
6	0.38404	0.022106	0.361934	0.36	0.36	0	0	0	0
7	0.406168	0.200079	0.206088	0.21	0.21	0	0	0	0
8	0.415674	0.422156	-0.00648187	0	0	0	0	0	0
9	0.441205	0.663681	-0.222476	0	0	0	0.22	-0.22	0
10	0.496583	0.893692	-0.397109	0	0	0	0.39	-0.39	0.198
11	0.568004	1.02724	-0.459233	0	0	0	0.25889	-0.25889	0.549
12	0.649897	1.07358	-0.423681	0	0	0	0.42	-0.42	0.782
13	0.725099	1.06368	-0.338578	0	0	0	0	0	1.16
14	0.79904	1.01392	-0.214878	0	0	0	0	0	1.16
15	0.879513	0.868683	0.0108291	0.01	0.01	0	0	0	1.16
16	0.952222	0.704855	0.247367	0.25	0.25	0	0	0	1.16
17	1.02313	0.480568	0.542564	0.54	0.54	0	0	0	1.16
18	1.05072	0.24105	0.809667	0.81	0.706	0.104	0	0.104	1.16
19	1.01392	0.0363325	0.977585	0.97	0.706	0.264	0	0.264	1.0444
20	0.981163	0	0.981163	0.98	0.706	0.274	0	0.274	0.75111
21	0.94492	0	0.94492	0.94	0.706	0.234	0	0.234	0.44667
22	0.858617	0	0.858617	0.86	0.706	0.154	0	0.154	0.18667
23	0.719929	0	0.719929	0.72	0.706	0.014	0	0.014	0.015556
				633.249	611.248				nS = [100]
				9.44	8.396
t	load_winter	P_winter	net_winter	MG_winter	MG_winter	out(2)	in(2)	storage_out	ess(2)
0	0.287573	0	0.287573	0.29	0.29	0	0	0	0
1	0.256773	0	0.256773	0.26	0.26	0	0	0	0
2	0.250335	0	0.250335	0.25	0.25	0	0	0	0
3	0.257607	0	0.257607	0.26	0.26	0	0	0	0
4	0.265892	0	0.265892	0.27	0.27	0	0	0	0
5	0.282068	0	0.282068	0.28	0.28	0	0	0	0
6	0.33917	0	0.33917	0.34	0.34	0	0	0	0
7	0.389281	0	0.389281	0.39	0.39	0	0	0	0
8	0.370005	0.0608739	0.309131	0.31	0.31	0	0	0	0
9	0.359874	0.206037	0.153837	0.15	0.15	0	0	0	0
10	0.359734	0.361389	-0.00165525	0	0	0	0	0	0
11	0.358	0.472143	-0.114143	0	0	0	0.11	-0.11	0
12	0.355949	0.573193	-0.217244	0	0	0	0.21	-0.21	0.099
13	0.348226	0.589968	-0.241742	0	0	0	0.24	-0.24	0.288
14	0.337684	0.538257	-0.200574	0	0	0	0.2	-0.2	0.504
15	0.344408	0.448936	-0.104528	0	0	0	0.11	-0.11	0.684
16	0.368337	0.319466	0.0488702	0.05	0.05	0	0	0	0.783
17	0.434729	0.134793	0.299936	0.3	0.3	0	0	0	0.783
18	0.505919	0.00410354	0.501815	0.51	0.34306	0.16694	0	0.16694	0.783
19	0.520155	0	0.520155	0.52	0.34306	0.17694	0	0.17694	0.59751
20	0.505958	0	0.505958	0.51	0.34306	0.16694	0	0.16694	0.40091
21	0.472553	0	0.472553	0.47	0.34306	0.12694	0	0.12694	0.21542
22	0.414816	0	0.414816	0.41	0.34306	0.06694	0	0.06694	0.074378
23	0.341578	0	0.341578	0.34	0.34	0	0	0	0
				585.613	571.059				nS = [68];
				5.91	5.2053

## Sheet: Utility
t	load_summer	TPC_summer
1	7200	7200
2	6650	6650
3	6300	6300
4	6100	6100
5	6050	6050
6	6000	6000
7	6150	6150
8	6600	6600
9	7750	7750
10	8600	8600
11	9550	9550
12	10250	10250
13	10000	10000
14	9850	9850
15	10250	10250
16	10400	10400
17	10200	10200
18	9750	9750
19	9500	9500
20	9650	9650
21	9550	9550
22	9350	9350
23	8700	8700
24	8050	8050
		3.97956e+06
		202450
t	load_winter	TPC_winter
1	4950	4950
2	4750	4750
3	4650	4650
4	4700	4700
5	4800	4800
6	4900	4900
7	5050	5050
8	5600	5600
9	7100	7100
10	7700	7700
11	8000	8000
12	8200	8200
13	7450	7450
14	7550	7550
15	7950	7950
16	8050	8050
17	8100	8100
18	8200	8200
19	8100	8100
20	7600	7600
21	7250	7250
22	6750	6750
23	6350	6350
24	6000	6000
		2.91793e+06
		159750

## Sheet: Joint(no_storage)
t	mg_summer	ug_summer	P_summer	MG_summer	TPC_summer	$/MG	$/TPC
1	0.602043	7200	0	0	7200.6	0	129249
2	0.516191	6650	0	0	6650.5	0	117952
3	0.463113	6300	0	0	6300.5	0	111506
4	0.430021	6100	0	0	6100.4	0	108080
5	0.403615	6050	0	0	6050.4	0	107254
6	0.381108	6000	0	0	6000.4	0	106439
7	0.38404	6150	0.022106	0	6150.4	0	108919
8	0.406168	6600	0.200079	0	6600.2	0	116990
9	0.415674	7750	0.422156	0	7750	0	141954
10	0.441205	8600	0.663681	4.33	8595.5	116.867	164284
11	0.496583	9550	0.893692	4.33	9545.3	116.867	193384
12	0.568004	10250	1.02724	4.33	10245	116.867	217540
13	0.649897	10000	1.07358	4.33	9995.3	116.867	208655
14	0.725099	9850	1.06368	4.33	9845.3	116.867	203459
15	0.79904	10250	1.01392	4.33	10245	116.867	217540
16	0.879513	10400	0.868683	4.33	10396	116.867	223055
17	0.952222	10200	0.704855	4.33	10196	116.867	215773
18	1.02313	9750	0.480568	4.33	9746.2	116.867	200084
19	1.05072	9500	0.24105	4.33	9496.5	116.867	191786
20	1.01392	9650	0.0363325	4.33	9646.6	116.867	196739
21	0.981163	9550	0	4.33	9546.6	116.867	193427
22	0.94492	9350	0	4.33	9346.6	116.867	186945
23	0.858617	8700	0	4.33	8696.5	116.867	167177
24	0.719929	8050	0	0	8050.7	0	149510
				60.62	202397	1636.13	3.9777e+06
					3.97935e+06		3.97934e+06
t	mg_winter	ug_winter	P_winter	MG_winter	TPC_winter	$/MG	$/TPC
1	0.287573	4950	0	0	4950.3	0	90329.9
2	0.256773	4750	0	0	4750.3	0	87891.6
3	0.250335	4650	0	0	4650.3	0	86734.3
4	0.257607	4700	0	0	4700.3	0	87307.8
5	0.265892	4800	0	0	4800.3	0	88485.7
6	0.282068	4900	0	0	4900.3	0	89704.8
7	0.33917	5050	0	0	5050.3	0	91611
8	0.389281	5600	0	0	5600.4	0	99396.6
9	0.370005	7100	0.0608739	0	7100.3	0	126973
10	0.359874	7700	0.206037	0	7700.1	0	140600
11	0.359734	8000	0.361389	0	8000	0	147971
12	0.358	8200	0.472143	0	8199.9	0	153090
13	0.355949	7450	0.573193	0	7449.8	0	134733
14	0.348226	7550	0.589968	0	7549.8	0	137046
15	0.337684	7950	0.538257	0	7949.8	0	146711
16	0.344408	8050	0.448936	0	8049.9	0	149234
17	0.368337	8100	0.319466	0	8100.1	0	150514
18	0.434729	8200	0.134793	0	8200.3	0	153101
19	0.505919	8100	0.00410354	0	8100.5	0	150524
20	0.520155	7600	0	0	7600.5	0	138234
21	0.505958	7250	0	0	7250.5	0	130246
22	0.472553	6750	0	0	6750.5	0	119711
23	0.414816	6350	0	0	6350.4	0	112024
24	0.341578	6000	0	0	6000.3	0	105841
	max = [0.52]	159750		0	159755	0	2.91802e+06
					2.91801e+06		2.91802e+06

## Sheet: Joint(storage)
t	mg_summer	ug_summer	P_summer	net_summer	MG_summer	TPC_summer	out(2)	in(2)	storage_out	ess(2)	$/MG	$/TPC
1	0.602043	7200	0	7200.6	0	7200.6	0	0	0	0	0	129249
2	0.516191	6650	0	6650.52	0	6650.5	0	0	0	0	0	117952
3	0.463113	6300	0	6300.46	0	6300.5	0	0	0	0	0	111506
4	0.430021	6100	0	6100.43	0	6100.4	0	0	0	0	0	108080
5	0.403615	6050	0	6050.4	0	6050.7	0	0.28889	-0.28889	0	0	107259
6	0.381108	6000	0	6000.38	0	6001.4	0	1	-1	0.26	0	106455
7	0.38404	6150	0.022106	6150.36	0	6150.4	0	0	0	1.16	0	108919
8	0.406168	6600	0.200079	6600.21	0	6600.2	0	0	0	1.16	0	116990
9	0.415674	7750	0.422156	7749.99	0	7750	0	0	0	1.16	0	141954
10	0.441205	8600	0.663681	8599.78	4.33	8595.5	0	0	0	1.16	116.867	164284
11	0.496583	9550	0.893692	9549.6	4.33	9545.3	0	0	0	1.16	116.867	193384
12	0.568004	10250	1.02724	10249.5	4.33	10245	0	0	0	1.16	116.867	217540
13	0.649897	10000	1.07358	9999.58	4.33	9995.3	0	0	0	1.16	116.867	208655
14	0.725099	9850	1.06368	9849.66	4.33	9845.3	0	0	0	1.16	116.867	203459
15	0.79904	10250	1.01392	10249.8	4.33	10245	0.044	0	0.044	1.16	116.867	217540
16	0.879513	10400	0.868683	10400	4.33	10395	1	0	1	1.1111	116.867	223018
17	0.952222	10200	0.704855	10200.2	4.33	10196	0	0	0	0	116.867	215773
18	1.02313	9750	0.480568	9750.54	4.33	9746.2	0	0	0	0	116.867	200084
19	1.05072	9500	0.24105	9500.81	4.33	9496.5	0	0	0	0	116.867	191786
20	1.01392	9650	0.0363325	9650.98	4.33	9646.6	0	0	0	0	116.867	196739
21	0.981163	9550	0	9550.98	4.33	9546.6	0	0	0	0	116.867	193427
22	0.94492	9350	0	9350.94	4.33	9346.6	0	0	0	0	116.867	186945
23	0.858617	8700	0	8700.86	4.33	8696.5	0	0	0	0	116.867	167177
24	0.719929	8050	0	8050.72	0	8050.7	0	0	0	0	0	149510
					60.62	202397	1.044	1.28889		nS = [100]	1636.13	3.97769e+06
						3.97933e+06						3.97932e+06
t	mg_winter	ug_summer	P_winter	net_winter	MG_winter	TPC_winter	out(2)	in(2)	storage_out	ess(2)	$/MG	$/TPC
1	0.287573	4950	0	4950.29	0	4950.3	0	0	0	0	0	90329.9
2	0.256773	4750	0	4750.26	0	4750.3	0	0	0	0	0	87891.6
3	0.250335	4650	0	4650.25	0	4651.3	0	1	-1	0	0	86745.7
4	0.257607	4700	0	4700.26	0	4700.5	0	0.28889	-0.28889	11.52	0	87310.1
5	0.265892	4800	0	4800.27	0	4800.3	0	0	0	14.848	0	88485.7
6	0.282068	4900	0	4900.28	0	4900.3	0	0	0	14.848	0	89704.8
7	0.33917	5050	0	5050.34	0	5050.3	0	0	0	14.848	0	91611
8	0.389281	5600	0	5600.39	0	5600.4	0	0	0	14.848	0	99396.6
9	0.370005	7100	0.0608739	7100.31	0	7100.3	0	0	0	14.848	0	126973
10	0.359874	7700	0.206037	7700.15	0	7700.1	0	0	0	14.848	0	140600
11	0.359734	8000	0.361389	8000	0	8000	0	0	0	14.848	0	147971
12	0.358	8200	0.472143	8199.89	0	8199.6	0.317	0	0.317	14.848	0	153083
13	0.355949	7450	0.573193	7449.78	0	7449.8	0	0	0	7.6518	0	134733
14	0.348226	7550	0.589968	7549.76	0	7549.8	0	0	0	7.6518	0	137046
15	0.337684	7950	0.538257	7949.8	0	7949.8	0	0	0	7.6518	0	146711
16	0.344408	8050	0.448936	8049.9	0	8049.9	0	0	0	7.6518	0	149234
17	0.368337	8100	0.319466	8100.05	0	8100.1	0	0	0	7.6518	0	150514
18	0.434729	8200	0.134793	8200.3	0	8199.6	0.727	0	0.727	7.6518	0	153083
19	0.505919	8100	0.00410354	8100.5	0	8100.5	0	0	0	0	0	150524
20	0.520155	7600	0	7600.52	0	7600.5	0	0	0	0	0	138234
21	0.505958	7250	0	7250.51	0	7250.5	0	0	0	0	0	130246
22	0.472553	6750	0	6750.47	0	6750.5	0	0	0	0	0	119711
23	0.414816	6350	0	6350.41	0	6350.4	0	0	0	0	0	112024
24	0.341578	6000	0	6000.34	0	6000.3	0	0	0	0	0	105841
					0	159755	1.044	1.28889		nS = [100]	0	2.918e+06
						2.918e+06						2.918e+06

## Sheet: Coalition values
Scenarios		Production (MW)		Individual production ($/day)		Total generation cost ($/day)
		Summer	Winter	Summer	Winter	Summer	Winter
{m}		9.44	5.91	633.249	585.613	3.98019e+06	2.91851e+06
{U}		202450	159750	3.97956e+06	2.91793e+06
{m*}		8.396	5.2053	611.248	571.059	3.98017e+06	2.9185e+06
{U}		202450	159750	3.97956e+06	2.91793e+06
{m,U}	{m}	60.62	0	1636.13	0	3.97934e+06	2.91802e+06
	{U}	202397	159755	3.9777e+06	2.91802e+06
{m*,U}	{m*}	60.62	0	1636.13	0	3.97932e+06	2.918e+06
	{U}	202397	159755	3.97769e+06	2.918e+06
* indicates storage

## Sheet: Shapley Value
	System Cost Reduction Benefit from Joint-Operations
		Summer (in $/day)	Winter (in $/day)
	Jm*	611.248	571.059
	Ju*	3.97956e+06	2.91793e+06
	∑	3.98017e+06	2.9185e+06
	J*	3.97932e+06	2.918e+06
	Cost Sharing Benefit	850.16	493.971
	Shapley Value-based Cost Allocation
	Coalition	{m*}	{U}	{m*,U}	Benefit
	Summer Generation ($/day)	611.248	3.97956e+06	3.97932e+06	850.16
	Winter Generation ($/day)	571.059	2.91793e+06	2.918e+06	493.971
		Summer (in $/day)	Winter (in $/day)
	c(m)	611.248	571.059
	c(U)	3.97956e+06	2.91793e+06
	c(mU)	3.97932e+06	2.918e+06
	Total benefit:	850.16	493.971
	Shapley-Value:
		Summer (in $/day)		Winter (in $/day)
	Ordering	m’s share	U’s share	m’s share	U’s share
	mU	611.248	3.97871e+06	571.059	2.91743e+06
	Um	-238.912	3.97956e+06	77.0884	2.91793e+06
	Total	372.336	7.95827e+06	648.148	5.83536e+06
	Shapley-Value (Average)	186.168	3.97914e+06	324.074	2.91768e+06
	∑	3.97932e+06		2.918e+06
	Fairness property:	0.5		0.5		>> 50/50-sharing
		0.5		0.5		(both cases)
	C*(m)	425.08		246.985
	C*(U)	425.08		246.985
	Cost contribution from joint operations:
	· Total Cost for Microgrid:		186.168	324.074
	· Total Cost for Utility Grid:		3.97914e+06	2.91768e+06
	· Total Joint Cost:		3.97932e+06	2.918e+06
	Payment calculation scheme for energy exchange
	Payment calculation:
		Summer (in $/day)		Winter (in $/day)
		m’s share	U’s share	m’s share	U’s share
	Actual Production Costs	1636.13	3.97769e+06	0	2.918e+06
	Shapley-Value	186.168	3.97914e+06	324.074	2.91768e+06
	Daily Payment	-1449.96	1449.96	324.074	-324.074
	Coalition	{m*}	{U}	{m*,U}	Benefit
	Summer Generation ($/day)	611.248	3.97956e+06	3.97932e+06	850.16
	Winter Generation ($/day)	571.059	2.91793e+06	2.918e+06	493.971
	Subset of {m*,U}	Subset without m*	# of subsets	Fraction/weight	cost difference
	{m*,U}	{U}	1	½	-238.912
	{m*}	{Ø}	1	½	611.248
				SV(m*)	186.168
	Subset of {m*,U}	Subset without U	# of subsets	Fraction/weight	cost difference
	{m*,U}	{m*}	1	½	3.97871e+06
	{U}	{Ø}	1	½	3.97956e+06
				SV(U)	3.97914e+06
	Subset of {m*,U}	Subset without m*	# of subsets	Fraction/weight	cost difference
	{m*,U}	{U}	1	½	77.0884
	{m*}	{Ø}	1	½	571.059
				SV(m*)	324.074
	Subset of {m*,U}	Subset without U	# of subsets	Fraction/weight	cost difference
	{m*,U}	{m*}	1	½	2.91743e+06
	{U}	{Ø}	1	½	2.91793e+06
				SV(U)	2.91768e+06

## Sheet: CEG
	No Storage		Storage				∆ (No Storage - Storage)
	Summer (in $/day)	Winter (in $/day)	Summer (in $/day)	Winter (in $/day)			Summer (in $/day)	Winter (in $/day)
Jm*	633.249	585.613	611.248	571.059		∆Jm*	22.0012	14.5542
Microgrid (storage)	#REF!	#REF!	#REF!	#REF!		Microgrid (storage)	#REF!	#REF!
Ju*	3.97956e+06	2.91793e+06	3.97956e+06	2.91793e+06		∆Ju*	0	0
∑	3.98019e+06	2.91851e+06	3.98017e+06	2.9185e+06		∆∑	22.0012	14.5542
J*	3.97935e+06	2.91801e+06	3.97933e+06	2.918e+06		∆J*	17.5451	12.4562
Cost Saving Benefit	845.549	498.39	841.093	496.292		∆Cost Saving Benefit	4.45609	2.09794
D. Collaboration between utility and micro grids with each minimizing individual costs (power exchange)
	No Storage		Storage
	Summer (in $/day)	Winter (in $/day)	Summer (in $/day)	Winter (in $/day)
c(m)	633.249	585.613	611.248	571.059
c(U)	3.97956e+06	2.91793e+06	3.97956e+06	2.91793e+06
c(mU)	3.97935e+06	2.91801e+06	3.97933e+06	2.918e+06
Distributed cost through collaboration between microgrid & utility grid:
· Total Cost for Microgrid:		633.249	585.613	611.248	571.059	>> to utility
· Total Cost for Utility Grid:		3.97871e+06	2.91743e+06	3.97872e+06	2.91743e+06
Total benefit from team production :		845.549	498.39	841.093	496.292
Cost savings: 50/50-Sharing
C*(m)	0		0		0		0
C*(U)	845.549		498.39		841.093		496.292

## Sheet: CEL
	No Storage		Storage				∆ (No Storage - Storage)
	Summer (in $/day)	Winter (in $/day)	Summer (in $/day)	Winter (in $/day)			Summer (in $/day)	Winter (in $/day)
Jm*	633.249	585.613	611.248	571.059		∆Jm*	22.0012	14.5542
Microgrid (storage)	#REF!	#REF!	#REF!	#REF!		Microgrid (storage)	#REF!	#REF!
Ju*	3.97956e+06	2.91793e+06	3.97956e+06	2.91793e+06		∆Ju*	0	0
∑	3.98019e+06	2.91851e+06	3.98017e+06	2.9185e+06		∆∑	22.0012	14.5542
J*	3.97935e+06	2.91801e+06	3.97933e+06	2.918e+06		∆J*	17.5451	12.4562
Cost Saving Benefit	845.549	498.39	841.093	496.292		∆Cost Saving Benefit	4.45609	2.09794
D. Collaboration between utility and micro grids with each minimizing individual costs (power exchange)
	No Storage		Storage
	Summer (in $/day)	Winter (in $/day)	Summer (in $/day)	Winter (in $/day)
c(m)	633.249	585.613	611.248	571.059
c(U)	3.97956e+06	2.91793e+06	3.97956e+06	2.91793e+06
c(mU)	3.97935e+06	2.91801e+06	3.97933e+06	2.918e+06
	845.549	498.39	841.093	496.292
Distributed cost through collaboration between microgrid & utility grid:
· Total Cost for Microgrid:		0	43.6119	0	37.3838	>> to utility
· Total Cost for Utility Grid:		3.97893e+06	2.91751e+06	3.97849e+06	2.9175e+06
Total benefit from team production :		845.549	498.39	841.093	496.292
Cost savings: 50/50-Sharing
C*(m)	633.249		542.002		611.248		533.676
C*(U)	422.774		411.166		1070.94		2.9175e+06

## Sheet: Calculation
		Summer (in $/day)	Winter (in $/day)
	Jm*	633.249	585.613
	Jm,s*	611.248	571.059
	∆J	22.0012	14.5542
	Ju*	3.97956e+06	2.91793e+06
	∑	3.98019e+06	2.91851e+06
	∑	3.98017e+06	2.9185e+06
	J*	3.97935e+06	2.91801e+06
	Benefit (no storage)	845.549	498.39
	Js*	3.97933e+06	2.918e+06
	Benefit (community storage)	841.093	496.292		>> microgrid: storage is coupled to renewables; no generation cost for storage inefficiencies
		17.5451	12.4562		>> utility: storage is used for trading-off peak-load generation costs; generation cost for storage input and storage inefficiencies (reduces total cost but also reduces cost sharing benefit)
	∆J	17.5451	483.836
	D. Collaboration between utility and micro grids with each minimizing individual costs (power exchange)
		No Storage		Storage
		Summer (in $/day)	Winter (in $/day)	Summer (in $/day)	Winter (in $/day)
	c(m)	633.249	585.613	611.248	571.059
	c(U)	3.97956e+06	2.91793e+06	3.97956e+06	2.91793e+06
	c(mU)	3.97935e+06	2.91801e+06	3.97933e+06	2.918e+06
		No Storage				Storage
		Summer (in $/day)		Winter (in $/day)		Summer (in $/day)		Winter (in $/day)
	Ordering	m’s share	U’s share	m’s share	U’s share	m’s share	U’s share	m’s share	U’s share
	mU	633.249	3.97871e+06	585.613	2.91743e+06	611.248	3.97872e+06	571.059	2.91743e+06
	Um	-212.3	3.97956e+06	87.2237	2.91793e+06	-229.845	3.97956e+06	74.7675	2.91793e+06
	Total	420.949	7.95827e+06	672.837	5.83535e+06	381.403	7.95828e+06	645.827	5.83536e+06
	Average	210.474	3.97914e+06	336.419	2.91768e+06	190.701	3.97914e+06	322.913	2.91768e+06
	Fairly distributed cost through collaboration between microgrid & utility grid:
	· Total Cost for Microgrid:		210.474	336.419	190.701	322.913	>> to utility
	· Total Cost for Utility Grid:		3.97893e+06	2.91734e+06	3.97895e+06	2.91735e+06
	Total benefit from team production :		845.549	498.39	841.093	496.292
	Cost savings: 50/50-Sharing
	C*(m)	422.774		249.195		420.546		248.146
	C*(U)	422.774		249.195		420.546		248.146
