# Supplementary material
Source: MDPI journal article supplement (https://www.mdpi.com/2073-4336/8/4/45)
Supplement: s1 [file s1 › Part 2 - Data Analysis/Microgrid (Mueller)/mueller_analysis.xlsx]

## Sheet: HVC-190X(PV)
	HVC-190X	PV_array
Maximum power (Pmax) [W]	82	5500
Inverter efficiency (ηinv)	0.95	0.95
Derate factors (ηother)	0.93	0.93
Module efficiency (ηPV)	0.1065	0.1065
PV panel efficiency (ηref)	0.12	0.12
Temperature coefficient of power (βref)	-0.0045	-0.0045
Ambient Temperature (Ta)
Reference Temperature of PV panels (Tref)	25	25
Nominal operating cell temperature (TNOCT)	50.3	50.3
Ambient NOCT (Ta,NOCT)	20	20
Irradiation [W/m^2] (IT)
Irradiation STC [W/m2] (INOCT)	1000	1000

## Sheet: C50(MGT)
Combustion Turbine Heat Rate & Cost Curves
FC ($/mmBTU)	3
Output	Heat Input	Heat Rate	Cost	IC
(MW)	(MBtu/hr)	(Btu/kWh)	($/hr)	($/MWh)
0.55	12.65	23000	37.95	69
0.63	13.23	21000	39.69	63
0.715	13.585	19000	40.755	57
0.85	14.45	17000	43.35	51
1.03	15.45	15000	46.35	45
1.185	16.59	14000	49.77	42
1.315	17.095	13000	51.285	39
1.6	19.2	12000	57.6	36
2	23	11500	69	34.5
2.4	25.2	10500	75.6	31.5
2.8	28	10000	84	30
3.3	32.307	9790	96.921	29.37
4.1	36.9	9000	110.7	27
	Unit	a	b	c	min	max
	M50	25.77	20.56	0.1105	0.55	4.1
	M50	f(x) = a+b*x+c*x^2
		a = 25.77 (22.92, 28.62)
		b = 20.56 (17.32, 23.79)
		c = 0.1105 (-0.6154, 0.8365)

## Sheet: Solar(Irradiation)
t	GHI_winter	GHI_summer
0	0	0
1	0	0
2	0	0
3	0	0
4	0	0
5	0	0
6	0	17.7174
7	0	160.359
8	48.7889	338.348
9	165.133	531.924
10	289.644	716.272
11	378.411	823.304
12	459.4	860.446
13	472.844	852.511
14	431.4	812.63
15	359.811	696.228
16	256.044	564.924
17	108.033	385.163
18	3.28889	193.196
19	0	29.1196
20	0	0
21	0	0
22	0	0
23	0	0

## Sheet: P(Load)
	Load [MW]		PV Generation [MW]		MT Output [MW]		Net Electricity Usage				Generation cost [$/MWh]
t	load_winter	load_summer	PV_winter	PV_summer	MT_winter	MT_summer	mueller_net_winter [MW]	home_net_winter [kW]	mueller_net_summer [MW]	home_net_summer [kW]	fuel_m50_winter	fuel_m50_summer		f(x) = a+b*x+c*x^2
0	0.287573	0.602043	0	0	0.287573	0.602043	0.287573	1.12333	0.602043	2.35173	31.6916	38.188		a = 25.77 (22.92, 28.62)
1	0.256773	0.516191	0	0	0.256773	0.516191	0.256773	1.00302	0.516191	2.01637	31.0565	36.4123		b = 20.56 (17.32, 23.79)
2	0.250335	0.463113	0	0	0.250335	0.463113	0.250335	0.97787	0.463113	1.80904	30.9238	35.3153		c = 0.1105 (-0.6154, 0.8365)
3	0.257607	0.430021	0	0	0.257607	0.430021	0.257607	1.00628	0.430021	1.67977	31.0737	34.6317
4	0.265892	0.403615	0	0	0.265892	0.403615	0.265892	1.03864	0.403615	1.57662	31.2445	34.0863
5	0.282068	0.381108	0	0	0.282068	0.381108	0.282068	1.10183	0.381108	1.4887	31.5781	33.6216
6	0.33917	0.38404	0	0.022106	0.33917	0.361934	0.33917	1.32488	0.361934	1.4138	32.7561	33.2258
7	0.389281	0.406168	0	0.200079	0.389281	0.206088	0.389281	1.52063	0.206088	0.805032	33.7904	30.0119
8	0.370005	0.415674	0.0608739	0.422156	0.309131	0	0.309131	1.20754	-0.00648187	-0.0253198	32.1363	0
9	0.359874	0.441205	0.206037	0.663681	0.153837	0	0.153837	0.600926	-0.222476	-0.869046	28.9355	0
10	0.359734	0.496583	0.361389	0.893692	0	0	-0.00165525	-0.00646581	-0.397109	-1.55121	0	0
11	0.358	0.568004	0.472143	1.02724	0	0	-0.114143	-0.445873	-0.459233	-1.79388	0	0
12	0.355949	0.649897	0.573193	1.07358	0	0	-0.217244	-0.848608	-0.423681	-1.655	0	0
13	0.348226	0.725099	0.589968	1.06368	0	0	-0.241742	-0.944305	-0.338578	-1.32257	0	0
14	0.337684	0.79904	0.538257	1.01392	0	0	-0.200574	-0.783491	-0.214878	-0.839367	0	0
15	0.344408	0.879513	0.448936	0.868683	0	0.0108291	-0.104528	-0.408312	0.0108291	0.0423012	0	25.9927
16	0.368337	0.952222	0.319466	0.704855	0.0488702	0.247367	0.0488702	0.190899	0.247367	0.966276	26.775	30.8626
17	0.434729	1.02313	0.134793	0.480568	0.299936	0.542564	0.299936	1.17163	0.542564	2.11939	31.9466	36.9576
18	0.505919	1.05072	0.00410354	0.24105	0.501815	0.809667	0.501815	1.96022	0.809667	3.16276	36.1152	42.4892
19	0.520155	1.01392	0	0.0363325	0.520155	0.977585	0.520155	2.03185	0.977585	3.81869	36.4943	45.9748
20	0.505958	0.981163	0	0	0.505958	0.981163	0.505958	1.9764	0.981163	3.83267	36.2008	46.0491
21	0.472553	0.94492	0	0	0.472553	0.94492	0.472553	1.84591	0.94492	3.69109	35.5104	45.2962
22	0.414816	0.858617	0	0	0.414816	0.858617	0.414816	1.62037	0.858617	3.35397	34.3176	43.5046
23	0.341578	0.719929	0	0	0.341578	0.719929	0.341578	1.33429	0.719929	2.81222	32.8057	40.629
SUM	8.72662	16.1059									585.352	633.249

## Sheet: P(PV)
	Winter 2011/12
	Ambient conditions		Technical Data					Power output (winter)		Power output (summer) [kW]
t	I_t (W/m^2)	I_t (W/m^2)	I_NOCT [W/m2]	P_max [W]	T_ref [°C]	T_NOCT [°C]	β_ref	system_winter [kW]	mueller_winter [MW]	system_summer [kW]	mueller_summer [MW]
0	0	0	1000	5500	25	50.3	-0.0045	0	0	0	0
1	0	0	1000	5500	25	50.3	-0.0045	0	0	0	0
2	0	0	1000	5500	25	50.3	-0.0045	0	0	0	0
3	0	0	1000	5500	25	50.3	-0.0045	0	0	0	0
4	0	0	1000	5500	25	50.3	-0.0045	0	0	0	0
5	0	0	1000	5500	25	50.3	-0.0045	0	0	0	0
6	0	17.7174	1000	5500	25	50.3	-0.0045	0	0	0.0863515	0.022106
7	0	160.359	1000	5500	25	50.3	-0.0045	0	0	0.78156	0.200079
8	48.7889	338.348	1000	5500	25	50.3	-0.0045	0.237789	0.0608739	1.64905	0.422156
9	165.133	531.924	1000	5500	25	50.3	-0.0045	0.804831	0.206037	2.5925	0.663681
10	289.644	716.272	1000	5500	25	50.3	-0.0045	1.41168	0.361389	3.49098	0.893692
11	378.411	823.304	1000	5500	25	50.3	-0.0045	1.84431	0.472143	4.01264	1.02724
12	459.4	860.446	1000	5500	25	50.3	-0.0045	2.23904	0.573193	4.19366	1.07358
13	472.844	852.511	1000	5500	25	50.3	-0.0045	2.30456	0.589968	4.15499	1.06368
14	431.4	812.63	1000	5500	25	50.3	-0.0045	2.10257	0.538257	3.96062	1.01392
15	359.811	696.228	1000	5500	25	50.3	-0.0045	1.75366	0.448936	3.39329	0.868683
16	256.044	564.924	1000	5500	25	50.3	-0.0045	1.24792	0.319466	2.75334	0.704855
17	108.033	385.163	1000	5500	25	50.3	-0.0045	0.526536	0.134793	1.87722	0.480568
18	3.28889	193.196	1000	5500	25	50.3	-0.0045	0.0160295	0.00410354	0.941602	0.24105
19	0	29.1196	1000	5500	25	50.3	-0.0045	0	0	0.141924	0.0363325
20	0	0	1000	5500	25	50.3	-0.0045	0	0	0	0				1000
21	0	0	1000	5500	25	50.3	-0.0045	0	0	0	0
22	0	0	1000	5500	25	50.3	-0.0045	0	0	0	0
23	0	0	1000	5500	25	50.3	-0.0045	0	0	0	0
		Average daily PV generation

## Sheet: NREL_winter
Year	Month	Day	Hour	Minute	GHI	Temp
2011	12	1	0	0	0	9.85
2011	12	1	1	0	0	8.85
2011	12	1	2	0	0	8.85
2011	12	1	3	0	0	8.85
2011	12	1	4	0	0	7.85
2011	12	1	5	0	0	7.85
2011	12	1	6	0	0	7.85
2011	12	1	7	0	0	8.85
2011	12	1	8	0	105	9.85
2011	12	1	9	0	171	10.85
2011	12	1	10	0	187	11.85
2011	12	1	11	0	274	12.85
2011	12	1	12	0	476	13.85
2011	12	1	13	0	217	13.85
2011	12	1	14	0	305	14.85
2011	12	1	15	0	407	15.85
2011	12	1	16	0	228	15.85
2011	12	1	17	0	48	16.85
2011	12	1	18	0	0	16.85
2011	12	1	19	0	0	16.85
2011	12	1	20	0	0	16.85
2011	12	1	21	0	0	16.85
2011	12	1	22	0	0	15.85
2011	12	1	23	0	0	15.85
2011	12	2	0	0	0	15.85
2011	12	2	1	0	0	15.85
2011	12	2	2	0	0	15.85
2011	12	2	3	0	0	15.85
2011	12	2	4	0	0	14.85
2011	12	2	5	0	0	14.85
2011	12	2	6	0	0	14.85
2011	12	2	7	0	0	14.85
2011	12	2	8	0	24	13.85
2011	12	2	9	0	6	13.85
2011	12	2	10	0	14	13.85
2011	12	2	11	0	18	13.85
2011	12	2	12	0	24	13.85
2011	12	2	13	0	145	13.85
2011	12	2	14	0	103	13.85
2011	12	2	15	0	181	13.85
2011	12	2	16	0	134	13.85
2011	12	2	17	0	28	13.85
2011	12	2	18	0	0	13.85
2011	12	2	19	0	0	13.85
2011	12	2	20	0	0	13.85
2011	12	2	21	0	0	13.85
2011	12	2	22	0	0	13.85
2011	12	2	23	0	0	13.85
2011	12	3	0	0	0	13.85
2011	12	3	1	0	0	14.85
2011	12	3	2	0	0	14.85
2011	12	3	3	0	0	14.85
2011	12	3	4	0	0	15.85
2011	12	3	5	0	0	15.85
2011	12	3	6	0	0	15.85
2011	12	3	7	0	0	15.85
2011	12	3	8	0	4	16.85
2011	12	3	9	0	58	16.85
2011	12	3	10	0	14	17.85
2011	12	3	11	0	31	17.85
2011	12	3	12	0	145	17.85
2011	12	3	13	0	174	17.85
2011	12	3	14	0	207	17.85
2011	12	3	15	0	301	17.85
2011	12	3	16	0	120	17.85
2011	12	3	17	0	26	17.85
2011	12	3	18	0	0	17.85
2011	12	3	19	0	0	17.85
2011	12	3	20	0	0	17.85
2011	12	3	21	0	0	17.85
2011	12	3	22	0	0	17.85
2011	12	3	23	0	0	17.85
2011	12	4	0	0	0	17.85
2011	12	4	1	0	0	15.85
2011	12	4	2	0	0	15.85
2011	12	4	3	0	0	13.85
2011	12	4	4	0	0	12.85
2011	12	4	5	0	0	11.85
2011	12	4	6	0	0	10.85
2011	12	4	7	0	0	9.85
2011	12	4	8	0	31	9.85
2011	12	4	9	0	99	9.85
2011	12	4	10	0	127	8.85
2011	12	4	11	0	20	8.85
2011	12	4	12	0	21	8.85
2011	12	4	13	0	85	8.85
2011	12	4	14	0	153	7.85
2011	12	4	15	0	133	7.85
2011	12	4	16	0	51	7.85
2011	12	4	17	0	11	7.85
2011	12	4	18	0	0	6.85
2011	12	4	19	0	0	6.85
2011	12	4	20	0	0	6.85
2011	12	4	21	0	0	6.85
2011	12	4	22	0	0	6.85
2011	12	4	23	0	0	6.85
2011	12	5	0	0	0	6.85
2011	12	5	1	0	0	6.85
2011	12	5	2	0	0	6.85
2011	12	5	3	0	0	5.85
2011	12	5	4	0	0	5.85
2011	12	5	5	0	0	5.85
2011	12	5	6	0	0	5.85
2011	12	5	7	0	0	5.85
2011	12	5	8	0	29	5.85
2011	12	5	9	0	87	5.85
2011	12	5	10	0	100	5.85
2011	12	5	11	0	121	5.85
2011	12	5	12	0	108	5.85
2011	12	5	13	0	120	5.85
2011	12	5	14	0	201	4.85
2011	12	5	15	0	142	4.85
2011	12	5	16	0	152	4.85
2011	12	5	17	0	32	4.85
2011	12	5	18	0	0	3.85
2011	12	5	19	0	0	3.85
2011	12	5	20	0	0	3.85
2011	12	5	21	0	0	2.85
2011	12	5	22	0	0	2.85
2011	12	5	23	0	0	2.85
2011	12	6	0	0	0	2.85
2011	12	6	1	0	0	1.85
2011	12	6	2	0	0	1.85
2011	12	6	3	0	0	0.85
2011	12	6	4	0	0	0.85
2011	12	6	5	0	0	-0.15
2011	12	6	6	0	0	-0.15
2011	12	6	7	0	0	-0.15
2011	12	6	8	0	37	0.85
2011	12	6	9	0	160	0.85
2011	12	6	10	0	208	1.85
2011	12	6	11	0	599	1.85
2011	12	6	12	0	660	2.85
2011	12	6	13	0	284	2.85
2011	12	6	14	0	336	2.85
2011	12	6	15	0	433	2.85
2011	12	6	16	0	247	2.85
2011	12	6	17	0	54	2.85
2011	12	6	18	0	0	2.85
2011	12	6	19	0	0	1.85
2011	12	6	20	0	0	0.85
2011	12	6	21	0	0	0.85
2011	12	6	22	0	0	-0.15
2011	12	6	23	0	0	-0.15
2011	12	7	0	0	0	-1.15
2011	12	7	1	0	0	-1.15
2011	12	7	2	0	0	-1.15
2011	12	7	3	0	0	-1.15
2011	12	7	4	0	0	-2.15
2011	12	7	5	0	0	-2.15
2011	12	7	6	0	0	-2.15
2011	12	7	7	0	0	-0.15
2011	12	7	8	0	97	0.85
2011	12	7	9	0	295	2.85
2011	12	7	10	0	471	3.85
2011	12	7	11	0	595	5.85
2011	12	7	12	0	655	6.85
2011	12	7	13	0	646	6.85
2011	12	7	14	0	569	6.85
2011	12	7	15	0	349	6.85
2011	12	7	16	0	244	6.85
2011	12	7	17	0	53	6.85
2011	12	7	18	0	0	6.85
2011	12	7	19	0	0	6.85
2011	12	7	20	0	0	5.85
2011	12	7	21	0	0	5.85
2011	12	7	22	0	0	4.85
2011	12	7	23	0	0	4.85
2011	12	8	0	0	0	4.85
2011	12	8	1	0	0	3.85
2011	12	8	2	0	0	3.85
2011	12	8	3	0	0	3.85
2011	12	8	4	0	0	2.85
2011	12	8	5	0	0	2.85
2011	12	8	6	0	0	2.85
2011	12	8	7	0	0	3.85
2011	12	8	8	0	25	5.85
2011	12	8	9	0	93	6.85
2011	12	8	10	0	376	6.85
2011	12	8	11	0	303	7.85
2011	12	8	12	0	612	8.85
2011	12	8	13	0	603	8.85
2011	12	8	14	0	555	8.85
2011	12	8	15	0	419	8.85
2011	12	8	16	0	236	8.85
2011	12	8	17	0	50	8.85
2011	12	8	18	0	0	8.85
2011	12	8	19	0	0	7.85
2011	12	8	20	0	0	7.85
2011	12	8	21	0	0	7.85
2011	12	8	22	0	0	7.85
2011	12	8	23	0	0	7.85
2011	12	9	0	0	0	7.85
2011	12	9	1	0	0	6.85
2011	12	9	2	0	0	6.85
2011	12	9	3	0	0	6.85
2011	12	9	4	0	0	6.85
2011	12	9	5	0	0	6.85
2011	12	9	6	0	0	6.85
2011	12	9	7	0	0	7.85
2011	12	9	8	0	45	8.85
2011	12	9	9	0	76	8.85
2011	12	9	10	0	204	9.85
2011	12	9	11	0	224	10.85
2011	12	9	12	0	350	10.85
2011	12	9	13	0	555	10.85
2011	12	9	14	0	509	10.85
2011	12	9	15	0	378	10.85
2011	12	9	16	0	216	10.85
2011	12	9	17	0	48	10.85
2011	12	9	18	0	0	10.85
2011	12	9	19	0	0	9.85
2011	12	9	20	0	0	9.85
2011	12	9	21	0	0	9.85
2011	12	9	22	0	0	8.85
2011	12	9	23	0	0	8.85
2011	12	10	0	0	0	8.85
2011	12	10	1	0	0	7.85
2011	12	10	2	0	0	7.85
2011	12	10	3	0	0	7.85
2011	12	10	4	0	0	7.85
2011	12	10	5	0	0	7.85
2011	12	10	6	0	0	7.85
2011	12	10	7	0	0	7.85
2011	12	10	8	0	39	7.85
2011	12	10	9	0	77	7.85
2011	12	10	10	0	208	7.85
2011	12	10	11	0	187	7.85
2011	12	10	12	0	305	7.85
2011	12	10	13	0	215	7.85
2011	12	10	14	0	122	7.85
2011	12	10	15	0	168	7.85
2011	12	10	16	0	67	7.85
2011	12	10	17	0	15	7.85
2011	12	10	18	0	0	7.85
2011	12	10	19	0	0	7.85
2011	12	10	20	0	0	7.85
2011	12	10	21	0	0	7.85
2011	12	10	22	0	0	6.85
2011	12	10	23	0	0	6.85
2011	12	11	0	0	0	6.85
2011	12	11	1	0	0	6.85
2011	12	11	2	0	0	6.85
2011	12	11	3	0	0	6.85
2011	12	11	4	0	0	6.85
2011	12	11	5	0	0	6.85
2011	12	11	6	0	0	6.85
2011	12	11	7	0	0	6.85
2011	12	11	8	0	27	6.85
2011	12	11	9	0	105	6.85
2011	12	11	10	0	224	6.85
2011	12	11	11	0	183	6.85
2011	12	11	12	0	248	6.85
2011	12	11	13	0	403	6.85
2011	12	11	14	0	223	6.85
2011	12	11	15	0	123	7.85
2011	12	11	16	0	153	7.85
2011	12	11	17	0	34	7.85
2011	12	11	18	0	0	7.85
2011	12	11	19	0	0	7.85
2011	12	11	20	0	0	7.85
2011	12	11	21	0	0	7.85
2011	12	11	22	0	0	7.85
2011	12	11	23	0	0	8.85
2011	12	12	0	0	0	8.85
2011	12	12	1	0	0	7.85
2011	12	12	2	0	0	7.85
2011	12	12	3	0	0	7.85
2011	12	12	4	0	0	7.85
2011	12	12	5	0	0	7.85
2011	12	12	6	0	0	7.85
2011	12	12	7	0	0	7.85
2011	12	12	8	0	24	7.85
2011	12	12	9	0	94	8.85
2011	12	12	10	0	62	8.85
2011	12	12	11	0	336	9.85
2011	12	12	12	0	207	9.85
2011	12	12	13	0	425	9.85
2011	12	12	14	0	148	9.85
2011	12	12	15	0	115	9.85
2011	12	12	16	0	150	9.85
2011	12	12	17	0	33	9.85
2011	12	12	18	0	0	10.85
2011	12	12	19	0	0	10.85
2011	12	12	20	0	0	10.85
2011	12	12	21	0	0	11.85
2011	12	12	22	0	0	11.85
2011	12	12	23	0	0	12.85
2011	12	13	0	0	0	12.85
2011	12	13	1	0	0	12.85
2011	12	13	2	0	0	12.85
2011	12	13	3	0	0	12.85
2011	12	13	4	0	0	13.85
2011	12	13	5	0	0	13.85
2011	12	13	6	0	0	13.85
2011	12	13	7	0	0	13.85
2011	12	13	8	0	2	14.85
2011	12	13	9	0	6	14.85
2011	12	13	10	0	13	14.85
2011	12	13	11	0	87	15.85
2011	12	13	12	0	20	15.85
2011	12	13	13	0	72	15.85
2011	12	13	14	0	104	15.85
2011	12	13	15	0	66	16.85
2011	12	13	16	0	98	16.85
2011	12	13	17	0	22	16.85
2011	12	13	18	0	0	17.85
2011	12	13	19	0	0	17.85
2011	12	13	20	0	0	17.85
2011	12	13	21	0	0	17.85
2011	12	13	22	0	0	17.85
2011	12	13	23	0	0	18.85
2011	12	14	0	0	0	18.85
2011	12	14	1	0	0	18.85
2011	12	14	2	0	0	18.85
2011	12	14	3	0	0	18.85
2011	12	14	4	0	0	18.85
2011	12	14	5	0	0	18.85
2011	12	14	6	0	0	18.85
2011	12	14	7	0	0	19.85
2011	12	14	8	0	20	19.85
2011	12	14	9	0	87	19.85
2011	12	14	10	0	115	19.85
2011	12	14	11	0	205	19.85
2011	12	14	12	0	125	19.85
2011	12	14	13	0	104	19.85
2011	12	14	14	0	158	19.85
2011	12	14	15	0	35	19.85
2011	12	14	16	0	102	19.85
2011	12	14	17	0	23	19.85
2011	12	14	18	0	0	19.85
2011	12	14	19	0	0	19.85
2011	12	14	20	0	0	19.85
2011	12	14	21	0	0	19.85
2011	12	14	22	0	0	19.85
2011	12	14	23	0	0	19.85
2011	12	15	0	0	0	18.85
2011	12	15	1	0	0	18.85
2011	12	15	2	0	0	18.85
2011	12	15	3	0	0	17.85
2011	12	15	4	0	0	17.85
2011	12	15	5	0	0	17.85
2011	12	15	6	0	0	16.85
2011	12	15	7	0	0	15.85
2011	12	15	8	0	19	15.85
2011	12	15	9	0	30	14.85
2011	12	15	10	0	12	13.85
2011	12	15	11	0	17	12.85
2011	12	15	12	0	22	12.85
2011	12	15	13	0	169	11.85
2011	12	15	14	0	119	11.85
2011	12	15	15	0	121	11.85
2011	12	15	16	0	4	11.85
2011	12	15	17	0	1	11.85
2011	12	15	18	0	0	10.85
2011	12	15	19	0	0	10.85
2011	12	15	20	0	0	10.85
2011	12	15	21	0	0	9.85
2011	12	15	22	0	0	9.85
2011	12	15	23	0	0	8.85
2011	12	16	0	0	0	8.85
2011	12	16	1	0	0	8.85
2011	12	16	2	0	0	7.85
2011	12	16	3	0	0	7.85
2011	12	16	4	0	0	7.85
2011	12	16	5	0	0	7.85
2011	12	16	6	0	0	7.85
2011	12	16	7	0	0	7.85
2011	12	16	8	0	29	7.85
2011	12	16	9	0	126	7.85
2011	12	16	10	0	133	8.85
2011	12	16	11	0	129	8.85
2011	12	16	12	0	221	8.85
2011	12	16	13	0	226	8.85
2011	12	16	14	0	256	8.85
2011	12	16	15	0	231	8.85
2011	12	16	16	0	121	8.85
2011	12	16	17	0	27	9.85
2011	12	16	18	0	0	9.85
2011	12	16	19	0	0	9.85
2011	12	16	20	0	0	8.85
2011	12	16	21	0	0	8.85
2011	12	16	22	0	0	8.85
2011	12	16	23	0	0	8.85
2011	12	17	0	0	0	8.85
2011	12	17	1	0	0	7.85
2011	12	17	2	0	0	7.85
2011	12	17	3	0	0	6.85
2011	12	17	4	0	0	6.85
2011	12	17	5	0	0	6.85
2011	12	17	6	0	0	6.85
2011	12	17	7	0	0	6.85
2011	12	17	8	0	74	7.85
2011	12	17	9	0	188	7.85
2011	12	17	10	0	231	8.85
2011	12	17	11	0	517	9.85
2011	12	17	12	0	632	9.85
2011	12	17	13	0	630	9.85
2011	12	17	14	0	559	9.85
2011	12	17	15	0	426	9.85
2011	12	17	16	0	247	9.85
2011	12	17	17	0	57	9.85
2011	12	17	18	0	0	9.85
2011	12	17	19	0	0	9.85
2011	12	17	20	0	0	9.85
2011	12	17	21	0	0	9.85
2011	12	17	22	0	0	9.85
2011	12	17	23	0	0	9.85
2011	12	18	0	0	0	9.85
2011	12	18	1	0	0	9.85
2011	12	18	2	0	0	8.85
2011	12	18	3	0	0	8.85
2011	12	18	4	0	0	8.85
2011	12	18	5	0	0	8.85
2011	12	18	6	0	0	8.85
2011	12	18	7	0	0	8.85
2011	12	18	8	0	24	9.85
2011	12	18	9	0	108	9.85
2011	12	18	10	0	114	9.85
2011	12	18	11	0	195	10.85
2011	12	18	12	0	282	10.85
2011	12	18	13	0	379	11.85
2011	12	18	14	0	412	11.85
2011	12	18	15	0	369	12.85
2011	12	18	16	0	218	12.85
2011	12	18	17	0	52	12.85
2011	12	18	18	0	0	13.85
2011	12	18	19	0	0	13.85
2011	12	18	20	0	0	12.85
2011	12	18	21	0	0	12.85
2011	12	18	22	0	0	12.85
2011	12	18	23	0	0	12.85
2011	12	19	0	0	0	12.85
2011	12	19	1	0	0	12.85
2011	12	19	2	0	0	13.85
2011	12	19	3	0	0	13.85
2011	12	19	4	0	0	14.85
2011	12	19	5	0	0	14.85
2011	12	19	6	0	0	15.85
2011	12	19	7	0	0	15.85
2011	12	19	8	0	1	15.85
2011	12	19	9	0	35	16.85
2011	12	19	10	0	63	17.85
2011	12	19	11	0	17	17.85
2011	12	19	12	0	78	18.85
2011	12	19	13	0	96	17.85
2011	12	19	14	0	16	17.85
2011	12	19	15	0	162	17.85
2011	12	19	16	0	106	16.85
2011	12	19	17	0	25	16.85
2011	12	19	18	0	0	16.85
2011	12	19	19	0	0	15.85
2011	12	19	20	0	0	15.85
2011	12	19	21	0	0	15.85
2011	12	19	22	0	0	15.85
2011	12	19	23	0	0	15.85
2011	12	20	0	0	0	14.85
2011	12	20	1	0	0	13.85
2011	12	20	2	0	0	12.85
2011	12	20	3	0	0	11.85
2011	12	20	4	0	0	10.85
2011	12	20	5	0	0	9.85
2011	12	20	6	0	0	8.85
2011	12	20	7	0	0	8.85
2011	12	20	8	0	65	9.85
2011	12	20	9	0	256	9.85
2011	12	20	10	0	403	10.85
2011	12	20	11	0	557	10.85
2011	12	20	12	0	623	10.85
2011	12	20	13	0	548	10.85
2011	12	20	14	0	332	10.85
2011	12	20	15	0	321	10.85
2011	12	20	16	0	209	10.85
2011	12	20	17	0	50	10.85
2011	12	20	18	0	0	9.85
2011	12	20	19	0	0	9.85
2011	12	20	20	0	0	8.85
2011	12	20	21	0	0	8.85
2011	12	20	22	0	0	7.85
2011	12	20	23	0	0	6.85
2011	12	21	0	0	0	6.85
2011	12	21	1	0	0	6.85
2011	12	21	2	0	0	6.85
2011	12	21	3	0	0	6.85
2011	12	21	4	0	0	6.85
2011	12	21	5	0	0	6.85
2011	12	21	6	0	0	6.85
2011	12	21	7	0	0	6.85
2011	12	21	8	0	34	6.85
2011	12	21	9	0	170	7.85
2011	12	21	10	0	123	7.85
2011	12	21	11	0	115	8.85
2011	12	21	12	0	161	8.85
2011	12	21	13	0	134	8.85
2011	12	21	14	0	91	8.85
2011	12	21	15	0	52	8.85
2011	12	21	16	0	112	8.85
2011	12	21	17	0	26	8.85
2011	12	21	18	0	0	8.85
2011	12	21	19	0	0	8.85
2011	12	21	20	0	0	8.85
2011	12	21	21	0	0	7.85
2011	12	21	22	0	0	7.85
2011	12	21	23	0	0	7.85
2011	12	22	0	0	0	7.85
2011	12	22	1	0	0	7.85
2011	12	22	2	0	0	7.85
2011	12	22	3	0	0	8.85
2011	12	22	4	0	0	8.85
2011	12	22	5	0	0	8.85
2011	12	22	6	0	0	8.85
2011	12	22	7	0	0	9.85
2011	12	22	8	0	64	9.85
2011	12	22	9	0	252	10.85
2011	12	22	10	0	426	11.85
2011	12	22	11	0	554	11.85
2011	12	22	12	0	621	12.85
2011	12	22	13	0	621	12.85
2011	12	22	14	0	554	12.85
2011	12	22	15	0	425	13.85
2011	12	22	16	0	250	13.85
2011	12	22	17	0	61	13.85
2011	12	22	18	0	0	13.85
2011	12	22	19	0	0	12.85
2011	12	22	20	0	0	10.85
2011	12	22	21	0	0	9.85
2011	12	22	22	0	0	7.85
2011	12	22	23	0	0	6.85
2011	12	23	0	0	0	5.85
2011	12	23	1	0	0	5.85
2011	12	23	2	0	0	5.85
2011	12	23	3	0	0	4.85
2011	12	23	4	0	0	4.85
2011	12	23	5	0	0	3.85
2011	12	23	6	0	0	3.85
2011	12	23	7	0	0	3.85
2011	12	23	8	0	18	4.85
2011	12	23	9	0	75	4.85
2011	12	23	10	0	85	5.85
2011	12	23	11	0	258	5.85
2011	12	23	12	0	231	5.85
2011	12	23	13	0	230	5.85
2011	12	23	14	0	179	5.85
2011	12	23	15	0	147	5.85
2011	12	23	16	0	137	5.85
2011	12	23	17	0	34	5.85
2011	12	23	18	0	0	5.85
2011	12	23	19	0	0	5.85
2011	12	23	20	0	0	4.85
2011	12	23	21	0	0	4.85
2011	12	23	22	0	0	4.85
2011	12	23	23	0	0	4.85
2011	12	24	0	0	0	4.85
2011	12	24	1	0	0	5.85
2011	12	24	2	0	0	5.85
2011	12	24	3	0	0	5.85
2011	12	24	4	0	0	5.85
2011	12	24	5	0	0	5.85
2011	12	24	6	0	0	5.85
2011	12	24	7	0	0	5.85
2011	12	24	8	0	27	5.85
2011	12	24	9	0	60	5.85
2011	12	24	10	0	61	5.85
2011	12	24	11	0	74	5.85
2011	12	24	12	0	70	5.85
2011	12	24	13	0	18	5.85
2011	12	24	14	0	88	5.85
2011	12	24	15	0	87	5.85
2011	12	24	16	0	56	5.85
2011	12	24	17	0	14	5.85
2011	12	24	18	0	0	4.85
2011	12	24	19	0	0	4.85
2011	12	24	20	0	0	4.85
2011	12	24	21	0	0	4.85
2011	12	24	22	0	0	4.85
2011	12	24	23	0	0	4.85
2011	12	25	0	0	0	4.85
2011	12	25	1	0	0	4.85
2011	12	25	2	0	0	4.85
2011	12	25	3	0	0	4.85
2011	12	25	4	0	0	4.85
2011	12	25	5	0	0	4.85
2011	12	25	6	0	0	4.85
2011	12	25	7	0	0	4.85
2011	12	25	8	0	44	4.85
2011	12	25	9	0	93	5.85
2011	12	25	10	0	138	5.85
2011	12	25	11	0	180	5.85
2011	12	25	12	0	19	6.85
2011	12	25	13	0	165	6.85
2011	12	25	14	0	190	6.85
2011	12	25	15	0	177	6.85
2011	12	25	16	0	155	6.85
2011	12	25	17	0	40	6.85
2011	12	25	18	0	0	6.85
2011	12	25	19	0	0	6.85
2011	12	25	20	0	0	6.85
2011	12	25	21	0	0	6.85
2011	12	25	22	0	0	6.85
2011	12	25	23	0	0	6.85
2011	12	26	0	0	0	6.85
2011	12	26	1	0	0	5.85
2011	12	26	2	0	0	5.85
2011	12	26	3	0	0	5.85
2011	12	26	4	0	0	5.85
2011	12	26	5	0	0	5.85
2011	12	26	6	0	0	5.85
2011	12	26	7	0	0	5.85
2011	12	26	8	0	24	6.85
2011	12	26	9	0	97	6.85
2011	12	26	10	0	202	6.85
2011	12	26	11	0	451	6.85
2011	12	26	12	0	571	6.85
2011	12	26	13	0	632	7.85
2011	12	26	14	0	567	7.85
2011	12	26	15	0	439	8.85
2011	12	26	16	0	263	8.85
2011	12	26	17	0	68	9.85
2011	12	26	18	0	0	9.85
2011	12	26	19	0	0	9.85
2011	12	26	20	0	0	8.85
2011	12	26	21	0	0	7.85
2011	12	26	22	0	0	7.85
2011	12	26	23	0	0	6.85
2011	12	27	0	0	0	6.85
2011	12	27	1	0	0	6.85
2011	12	27	2	0	0	6.85
2011	12	27	3	0	0	5.85
2011	12	27	4	0	0	5.85
2011	12	27	5	0	0	5.85
2011	12	27	6	0	0	5.85
2011	12	27	7	0	0	6.85
2011	12	27	8	0	60	6.85
2011	12	27	9	0	250	7.85
2011	12	27	10	0	427	8.85
2011	12	27	11	0	557	9.85
2011	12	27	12	0	627	10.85
2011	12	27	13	0	629	10.85
2011	12	27	14	0	564	11.85
2011	12	27	15	0	437	11.85
2011	12	27	16	0	262	11.85
2011	12	27	17	0	69	11.85
2011	12	27	18	0	0	11.85
2011	12	27	19	0	0	11.85
2011	12	27	20	0	0	10.85
2011	12	27	21	0	0	10.85
2011	12	27	22	0	0	10.85
2011	12	27	23	0	0	9.85
2011	12	28	0	0	0	9.85
2011	12	28	1	0	0	8.85
2011	12	28	2	0	0	8.85
2011	12	28	3	0	0	7.85
2011	12	28	4	0	0	7.85
2011	12	28	5	0	0	6.85
2011	12	28	6	0	0	6.85
2011	12	28	7	0	0	7.85
2011	12	28	8	0	45	8.85
2011	12	28	9	0	172	9.85
2011	12	28	10	0	190	10.85
2011	12	28	11	0	397	12.85
2011	12	28	12	0	581	12.85
2011	12	28	13	0	631	13.85
2011	12	28	14	0	567	13.85
2011	12	28	15	0	441	13.85
2011	12	28	16	0	266	13.85
2011	12	28	17	0	72	13.85
2011	12	28	18	0	0	13.85
2011	12	28	19	0	0	13.85
2011	12	28	20	0	0	12.85
2011	12	28	21	0	0	11.85
2011	12	28	22	0	0	10.85
2011	12	28	23	0	0	9.85
2011	12	29	0	0	0	8.85
2011	12	29	1	0	0	8.85
2011	12	29	2	0	0	8.85
2011	12	29	3	0	0	7.85
2011	12	29	4	0	0	7.85
2011	12	29	5	0	0	7.85
2011	12	29	6	0	0	7.85
2011	12	29	7	0	0	8.85
2011	12	29	8	0	57	9.85
2011	12	29	9	0	246	10.85
2011	12	29	10	0	423	12.85
2011	12	29	11	0	554	13.85
2011	12	29	12	0	625	14.85
2011	12	29	13	0	629	14.85
2011	12	29	14	0	564	14.85
2011	12	29	15	0	439	14.85
2011	12	29	16	0	264	14.85
2011	12	29	17	0	72	14.85
2011	12	29	18	0	0	14.85
2011	12	29	19	0	0	14.85
2011	12	29	20	0	0	13.85
2011	12	29	21	0	0	13.85
2011	12	29	22	0	0	13.85
2011	12	29	23	0	0	12.85
2011	12	30	0	0	0	12.85
2011	12	30	1	0	0	12.85
2011	12	30	2	0	0	12.85
2011	12	30	3	0	0	11.85
2011	12	30	4	0	0	11.85
2011	12	30	5	0	0	11.85
2011	12	30	6	0	0	11.85
2011	12	30	7	0	0	12.85
2011	12	30	8	0	56	13.85
2011	12	30	9	0	243	14.85
2011	12	30	10	0	419	15.85
2011	12	30	11	0	549	15.85
2011	12	30	12	0	621	15.85
2011	12	30	13	0	624	15.85
2011	12	30	14	0	561	15.85
2011	12	30	15	0	436	15.85
2011	12	30	16	0	263	15.85
2011	12	30	17	0	73	14.85
2011	12	30	18	0	0	14.85
2011	12	30	19	0	0	14.85
2011	12	30	20	0	0	13.85
2011	12	30	21	0	0	13.85
2011	12	30	22	0	0	12.85
2011	12	30	23	0	0	12.85
2011	12	31	0	0	0	11.85
2011	12	31	1	0	0	11.85
2011	12	31	2	0	0	11.85
2011	12	31	3	0	0	11.85
2011	12	31	4	0	0	11.85
2011	12	31	5	0	0	11.85
2011	12	31	6	0	0	11.85
2011	12	31	7	0	0	12.85
2011	12	31	8	0	55	14.85
2011	12	31	9	0	241	15.85
2011	12	31	10	0	418	15.85
2011	12	31	11	0	549	16.85
2011	12	31	12	0	620	17.85
2011	12	31	13	0	624	17.85
2011	12	31	14	0	563	17.85
2011	12	31	15	0	438	17.85
2011	12	31	16	0	266	17.85
2011	12	31	17	0	76	18.85
2011	12	31	18	0	0	17.85
2011	12	31	19	0	0	17.85
2011	12	31	20	0	0	16.85
2011	12	31	21	0	0	16.85
2011	12	31	22	0	0	15.85
2011	12	31	23	0	0	15.85
2012	1	1	0	0	0	15.85
2012	1	1	1	0	0	14.85
2012	1	1	2	0	0	12.85
2012	1	1	3	0	0	11.85
2012	1	1	4	0	0	10.85
2012	1	1	5	0	0	8.85
2012	1	1	6	0	0	8.85
2012	1	1	7	0	0	8.85
2012	1	1	8	0	60	9.85
2012	1	1	9	0	255	9.85
2012	1	1	10	0	437	10.85
2012	1	1	11	0	573	10.85
2012	1	1	12	0	647	11.85
2012	1	1	13	0	654	10.85
2012	1	1	14	0	591	10.85
2012	1	1	15	0	465	10.85
2012	1	1	16	0	289	10.85
2012	1	1	17	0	89	10.85
2012	1	1	18	0	0	9.85
2012	1	1	19	0	0	9.85
2012	1	1	20	0	0	8.85
2012	1	1	21	0	0	8.85
2012	1	1	22	0	0	7.85
2012	1	1	23	0	0	7.85
2012	1	2	0	0	0	6.85
2012	1	2	1	0	0	6.85
2012	1	2	2	0	0	6.85
2012	1	2	3	0	0	6.85
2012	1	2	4	0	0	5.85
2012	1	2	5	0	0	5.85
2012	1	2	6	0	0	4.85
2012	1	2	7	0	0	5.85
2012	1	2	8	0	60	6.85
2012	1	2	9	0	258	6.85
2012	1	2	10	0	442	7.85
2012	1	2	11	0	578	8.85
2012	1	2	12	0	653	9.85
2012	1	2	13	0	659	9.85
2012	1	2	14	0	596	9.85
2012	1	2	15	0	469	9.85
2012	1	2	16	0	293	9.85
2012	1	2	17	0	89	9.85
2012	1	2	18	0	0	9.85
2012	1	2	19	0	0	9.85
2012	1	2	20	0	0	8.85
2012	1	2	21	0	0	8.85
2012	1	2	22	0	0	8.85
2012	1	2	23	0	0	7.85
2012	1	3	0	0	0	7.85
2012	1	3	1	0	0	7.85
2012	1	3	2	0	0	6.85
2012	1	3	3	0	0	6.85
2012	1	3	4	0	0	6.85
2012	1	3	5	0	0	6.85
2012	1	3	6	0	0	6.85
2012	1	3	7	0	0	6.85
2012	1	3	8	0	58	7.85
2012	1	3	9	0	252	7.85
2012	1	3	10	0	433	8.85
2012	1	3	11	0	568	9.85
2012	1	3	12	0	642	10.85
2012	1	3	13	0	647	9.85
2012	1	3	14	0	585	9.85
2012	1	3	15	0	461	9.85
2012	1	3	16	0	287	9.85
2012	1	3	17	0	87	9.85
2012	1	3	18	0	0	9.85
2012	1	3	19	0	0	9.85
2012	1	3	20	0	0	8.85
2012	1	3	21	0	0	8.85
2012	1	3	22	0	0	7.85
2012	1	3	23	0	0	7.85
2012	1	4	0	0	0	6.85
2012	1	4	1	0	0	6.85
2012	1	4	2	0	0	6.85
2012	1	4	3	0	0	6.85
2012	1	4	4	0	0	6.85
2012	1	4	5	0	0	6.85
2012	1	4	6	0	0	6.85
2012	1	4	7	0	0	8.85
2012	1	4	8	0	57	9.85
2012	1	4	9	0	250	10.85
2012	1	4	10	0	431	12.85
2012	1	4	11	0	523	13.85
2012	1	4	12	0	642	14.85
2012	1	4	13	0	648	14.85
2012	1	4	14	0	527	15.85
2012	1	4	15	0	281	15.85
2012	1	4	16	0	290	15.85
2012	1	4	17	0	92	15.85
2012	1	4	18	0	0	15.85
2012	1	4	19	0	0	14.85
2012	1	4	20	0	0	13.85
2012	1	4	21	0	0	12.85
2012	1	4	22	0	0	11.85
2012	1	4	23	0	0	10.85
2012	1	5	0	0	0	10.85
2012	1	5	1	0	0	9.85
2012	1	5	2	0	0	9.85
2012	1	5	3	0	0	9.85
2012	1	5	4	0	0	9.85
2012	1	5	5	0	0	9.85
2012	1	5	6	0	0	9.85
2012	1	5	7	0	0	10.85
2012	1	5	8	0	55	10.85
2012	1	5	9	0	244	11.85
2012	1	5	10	0	398	12.85
2012	1	5	11	0	520	13.85
2012	1	5	12	0	629	14.85
2012	1	5	13	0	635	15.85
2012	1	5	14	0	480	15.85
2012	1	5	15	0	240	15.85
2012	1	5	16	0	226	16.85
2012	1	5	17	0	71	16.85
2012	1	5	18	0	0	16.85
2012	1	5	19	0	0	16.85
2012	1	5	20	0	0	16.85
2012	1	5	21	0	0	15.85
2012	1	5	22	0	0	15.85
2012	1	5	23	0	0	15.85
2012	1	6	0	0	0	14.85
2012	1	6	1	0	0	14.85
2012	1	6	2	0	0	14.85
2012	1	6	3	0	0	13.85
2012	1	6	4	0	0	13.85
2012	1	6	5	0	0	13.85
2012	1	6	6	0	0	13.85
2012	1	6	7	0	0	13.85
2012	1	6	8	0	53	14.85
2012	1	6	9	0	240	15.85
2012	1	6	10	0	419	16.85
2012	1	6	11	0	552	17.85
2012	1	6	12	0	626	18.85
2012	1	6	13	0	634	17.85
2012	1	6	14	0	575	17.85
2012	1	6	15	0	454	17.85
2012	1	6	16	0	284	17.85
2012	1	6	17	0	91	17.85
2012	1	6	18	0	0	17.85
2012	1	6	19	0	0	16.85
2012	1	6	20	0	0	16.85
2012	1	6	21	0	0	15.85
2012	1	6	22	0	0	15.85
2012	1	6	23	0	0	14.85
2012	1	7	0	0	0	14.85
2012	1	7	1	0	0	13.85
2012	1	7	2	0	0	13.85
2012	1	7	3	0	0	12.85
2012	1	7	4	0	0	12.85
2012	1	7	5	0	0	12.85
2012	1	7	6	0	0	12.85
2012	1	7	7	0	0	12.85
2012	1	7	8	0	54	12.85
2012	1	7	9	0	244	13.85
2012	1	7	10	0	424	13.85
2012	1	7	11	0	560	14.85
2012	1	7	12	0	635	14.85
2012	1	7	13	0	645	14.85
2012	1	7	14	0	585	14.85
2012	1	7	15	0	464	15.85
2012	1	7	16	0	293	15.85
2012	1	7	17	0	95	15.85
2012	1	7	18	0	0	15.85
2012	1	7	19	0	0	15.85
2012	1	7	20	0	0	14.85
2012	1	7	21	0	0	14.85
2012	1	7	22	0	0	13.85
2012	1	7	23	0	0	13.85
2012	1	8	0	0	0	12.85
2012	1	8	1	0	0	12.85
2012	1	8	2	0	0	11.85
2012	1	8	3	0	0	11.85
2012	1	8	4	0	0	10.85
2012	1	8	5	0	0	10.85
2012	1	8	6	0	0	10.85
2012	1	8	7	0	0	10.85
2012	1	8	8	0	5	11.85
2012	1	8	9	0	40	11.85
2012	1	8	10	0	103	11.85
2012	1	8	11	0	126	12.85
2012	1	8	12	0	205	12.85
2012	1	8	13	0	154	12.85
2012	1	8	14	0	256	12.85
2012	1	8	15	0	171	11.85
2012	1	8	16	0	96	11.85
2012	1	8	17	0	32	11.85
2012	1	8	18	0	0	11.85
2012	1	8	19	0	0	11.85
2012	1	8	20	0	0	11.85
2012	1	8	21	0	0	11.85
2012	1	8	22	0	0	12.85
2012	1	8	23	0	0	12.85
2012	1	9	0	0	0	12.85
2012	1	9	1	0	0	12.85
2012	1	9	2	0	0	11.85
2012	1	9	3	0	0	11.85
2012	1	9	4	0	0	11.85
2012	1	9	5	0	0	11.85
2012	1	9	6	0	0	11.85
2012	1	9	7	0	0	10.85
2012	1	9	8	0	1	10.85
2012	1	9	9	0	19	10.85
2012	1	9	10	0	60	9.85
2012	1	9	11	0	18	9.85
2012	1	9	12	0	84	9.85
2012	1	9	13	0	27	8.85
2012	1	9	14	0	20	8.85
2012	1	9	15	0	81	8.85
2012	1	9	16	0	150	8.85
2012	1	9	17	0	50	7.85
2012	1	9	18	0	0	7.85
2012	1	9	19	0	0	7.85
2012	1	9	20	0	0	6.85
2012	1	9	21	0	0	6.85
2012	1	9	22	0	0	6.85
2012	1	9	23	0	0	6.85
2012	1	10	0	0	0	6.85
2012	1	10	1	0	0	6.85
2012	1	10	2	0	0	6.85
2012	1	10	3	0	0	5.85
2012	1	10	4	0	0	5.85
2012	1	10	5	0	0	5.85
2012	1	10	6	0	0	5.85
2012	1	10	7	0	0	6.85
2012	1	10	8	0	27	6.85
2012	1	10	9	0	150	7.85
2012	1	10	10	0	355	8.85
2012	1	10	11	0	411	9.85
2012	1	10	12	0	645	9.85
2012	1	10	13	0	506	9.85
2012	1	10	14	0	361	10.85
2012	1	10	15	0	439	10.85
2012	1	10	16	0	279	10.85
2012	1	10	17	0	95	10.85
2012	1	10	18	0	0	10.85
2012	1	10	19	0	0	9.85
2012	1	10	20	0	0	9.85
2012	1	10	21	0	0	8.85
2012	1	10	22	0	0	8.85
2012	1	10	23	0	0	7.85
2012	1	11	0	0	0	7.85
2012	1	11	1	0	0	6.85
2012	1	11	2	0	0	6.85
2012	1	11	3	0	0	6.85
2012	1	11	4	0	0	6.85
2012	1	11	5	0	0	6.85
2012	1	11	6	0	0	6.85
2012	1	11	7	0	0	8.85
2012	1	11	8	0	54	10.85
2012	1	11	9	0	248	11.85
2012	1	11	10	0	433	13.85
2012	1	11	11	0	571	14.85
2012	1	11	12	0	650	15.85
2012	1	11	13	0	660	15.85
2012	1	11	14	0	602	15.85
2012	1	11	15	0	481	15.85
2012	1	11	16	0	307	16.85
2012	1	11	17	0	107	16.85
2012	1	11	18	0	0	16.85
2012	1	11	19	0	0	14.85
2012	1	11	20	0	0	13.85
2012	1	11	21	0	0	11.85
2012	1	11	22	0	0	10.85
2012	1	11	23	0	0	8.85
2012	1	12	0	0	0	6.85
2012	1	12	1	0	0	6.85
2012	1	12	2	0	0	6.85
2012	1	12	3	0	0	5.85
2012	1	12	4	0	0	4.85
2012	1	12	5	0	0	3.85
2012	1	12	6	0	0	2.85
2012	1	12	7	0	0	3.85
2012	1	12	8	0	28	3.85
2012	1	12	9	0	93	4.85
2012	1	12	10	0	421	4.85
2012	1	12	11	0	565	5.85
2012	1	12	12	0	640	5.85
2012	1	12	13	0	564	5.85
2012	1	12	14	0	169	5.85
2012	1	12	15	0	354	6.85
2012	1	12	16	0	178	6.85
2012	1	12	17	0	63	6.85
2012	1	12	18	0	0	6.85
2012	1	12	19	0	0	5.85
2012	1	12	20	0	0	5.85
2012	1	12	21	0	0	4.85
2012	1	12	22	0	0	4.85
2012	1	12	23	0	0	3.85
2012	1	13	0	0	0	3.85
2012	1	13	1	0	0	3.85
2012	1	13	2	0	0	3.85
2012	1	13	3	0	0	3.85
2012	1	13	4	0	0	3.85
2012	1	13	5	0	0	3.85
2012	1	13	6	0	0	3.85
2012	1	13	7	0	0	4.85
2012	1	13	8	0	47	5.85
2012	1	13	9	0	231	6.85
2012	1	13	10	0	420	6.85
2012	1	13	11	0	546	7.85
2012	1	13	12	0	577	7.85
2012	1	13	13	0	684	7.85
2012	1	13	14	0	626	8.85
2012	1	13	15	0	502	8.85
2012	1	13	16	0	324	8.85
2012	1	13	17	0	116	9.85
2012	1	13	18	0	0	9.85
2012	1	13	19	0	0	8.85
2012	1	13	20	0	0	7.85
2012	1	13	21	0	0	7.85
2012	1	13	22	0	0	6.85
2012	1	13	23	0	0	6.85
2012	1	14	0	0	0	6.85
2012	1	14	1	0	0	6.85
2012	1	14	2	0	0	5.85
2012	1	14	3	0	0	5.85
2012	1	14	4	0	0	5.85
2012	1	14	5	0	0	5.85
2012	1	14	6	0	0	5.85
2012	1	14	7	0	0	6.85
2012	1	14	8	0	57	7.85
2012	1	14	9	0	256	8.85
2012	1	14	10	0	446	9.85
2012	1	14	11	0	587	11.85
2012	1	14	12	0	668	12.85
2012	1	14	13	0	680	12.85
2012	1	14	14	0	621	12.85
2012	1	14	15	0	499	12.85
2012	1	14	16	0	322	12.85
2012	1	14	17	0	116	12.85
2012	1	14	18	0	0	12.85
2012	1	14	19	0	0	11.85
2012	1	14	20	0	0	11.85
2012	1	14	21	0	0	10.85
2012	1	14	22	0	0	9.85
2012	1	14	23	0	0	8.85
2012	1	15	0	0	0	8.85
2012	1	15	1	0	0	7.85
2012	1	15	2	0	0	7.85
2012	1	15	3	0	0	6.85
2012	1	15	4	0	0	6.85
2012	1	15	5	0	0	6.85
2012	1	15	6	0	0	6.85
2012	1	15	7	0	0	7.85
2012	1	15	8	0	37	8.85
2012	1	15	9	0	232	10.85
2012	1	15	10	0	427	11.85
2012	1	15	11	0	563	12.85
2012	1	15	12	0	297	13.85
2012	1	15	13	0	366	13.85
2012	1	15	14	0	238	13.85
2012	1	15	15	0	194	13.85
2012	1	15	16	0	276	13.85
2012	1	15	17	0	50	12.85
2012	1	15	18	0	0	12.85
2012	1	15	19	0	0	13.85
2012	1	15	20	0	0	13.85
2012	1	15	21	0	0	14.85
2012	1	15	22	0	0	14.85
2012	1	15	23	0	0	15.85
2012	1	16	0	0	0	15.85
2012	1	16	1	0	0	15.85
2012	1	16	2	0	0	15.85
2012	1	16	3	0	0	15.85
2012	1	16	4	0	0	15.85
2012	1	16	5	0	0	15.85
2012	1	16	6	0	0	15.85
2012	1	16	7	0	0	15.85
2012	1	16	8	0	9	15.85
2012	1	16	9	0	37	15.85
2012	1	16	10	0	87	16.85
2012	1	16	11	0	52	16.85
2012	1	16	12	0	20	16.85
2012	1	16	13	0	244	17.85
2012	1	16	14	0	329	17.85
2012	1	16	15	0	306	17.85
2012	1	16	16	0	68	17.85
2012	1	16	17	0	89	18.85
2012	1	16	18	0	0	18.85
2012	1	16	19	0	0	18.85
2012	1	16	20	0	0	18.85
2012	1	16	21	0	0	17.85
2012	1	16	22	0	0	17.85
2012	1	16	23	0	0	17.85
2012	1	17	0	0	0	17.85
2012	1	17	1	0	0	17.85
2012	1	17	2	0	0	17.85
2012	1	17	3	0	0	17.85
2012	1	17	4	0	0	17.85
2012	1	17	5	0	0	16.85
2012	1	17	6	0	0	16.85
2012	1	17	7	0	0	17.85
2012	1	17	8	0	57	17.85
2012	1	17	9	0	253	18.85
2012	1	17	10	0	440	18.85
2012	1	17	11	0	583	19.85
2012	1	17	12	0	666	19.85
2012	1	17	13	0	628	17.85
2012	1	17	14	0	560	16.85
2012	1	17	15	0	461	15.85
2012	1	17	16	0	332	13.85
2012	1	17	17	0	127	12.85
2012	1	17	18	0	0	10.85
2012	1	17	19	0	0	9.85
2012	1	17	20	0	0	8.85
2012	1	17	21	0	0	7.85
2012	1	17	22	0	0	6.85
2012	1	17	23	0	0	6.85
2012	1	18	0	0	0	5.85
2012	1	18	1	0	0	5.85
2012	1	18	2	0	0	4.85
2012	1	18	3	0	0	4.85
2012	1	18	4	0	0	3.85
2012	1	18	5	0	0	3.85
2012	1	18	6	0	0	3.85
2012	1	18	7	0	0	4.85
2012	1	18	8	0	57	5.85
2012	1	18	9	0	255	6.85
2012	1	18	10	0	441	6.85
2012	1	18	11	0	583	7.85
2012	1	18	12	0	664	8.85
2012	1	18	13	0	677	8.85
2012	1	18	14	0	620	9.85
2012	1	18	15	0	500	10.85
2012	1	18	16	0	327	11.85
2012	1	18	17	0	125	12.85
2012	1	18	18	0	0	12.85
2012	1	18	19	0	0	12.85
2012	1	18	20	0	0	11.85
2012	1	18	21	0	0	11.85
2012	1	18	22	0	0	11.85
2012	1	18	23	0	0	10.85
2012	1	19	0	0	0	10.85
2012	1	19	1	0	0	10.85
2012	1	19	2	0	0	10.85
2012	1	19	3	0	0	10.85
2012	1	19	4	0	0	10.85
2012	1	19	5	0	0	10.85
2012	1	19	6	0	0	10.85
2012	1	19	7	0	0	11.85
2012	1	19	8	0	52	13.85
2012	1	19	9	0	231	14.85
2012	1	19	10	0	414	15.85
2012	1	19	11	0	566	17.85
2012	1	19	12	0	612	18.85
2012	1	19	13	0	657	18.85
2012	1	19	14	0	603	18.85
2012	1	19	15	0	486	18.85
2012	1	19	16	0	302	18.85
2012	1	19	17	0	121	18.85
2012	1	19	18	0	0	18.85
2012	1	19	19	0	0	17.85
2012	1	19	20	0	0	17.85
2012	1	19	21	0	0	16.85
2012	1	19	22	0	0	16.85
2012	1	19	23	0	0	15.85
2012	1	20	0	0	0	15.85
2012	1	20	1	0	0	15.85
2012	1	20	2	0	0	15.85
2012	1	20	3	0	0	15.85
2012	1	20	4	0	0	15.85
2012	1	20	5	0	0	15.85
2012	1	20	6	0	0	15.85
2012	1	20	7	0	0	15.85
2012	1	20	8	0	13	16.85
2012	1	20	9	0	13	16.85
2012	1	20	10	0	130	16.85
2012	1	20	11	0	141	17.85
2012	1	20	12	0	246	17.85
2012	1	20	13	0	415	17.85
2012	1	20	14	0	382	17.85
2012	1	20	15	0	495	18.85
2012	1	20	16	0	326	18.85
2012	1	20	17	0	128	18.85
2012	1	20	18	0	0	18.85
2012	1	20	19	0	0	18.85
2012	1	20	20	0	0	18.85
2012	1	20	21	0	0	17.85
2012	1	20	22	0	0	17.85
2012	1	20	23	0	0	17.85
2012	1	21	0	0	0	16.85
2012	1	21	1	0	0	15.85
2012	1	21	2	0	0	13.85
2012	1	21	3	0	0	12.85
2012	1	21	4	0	0	10.85
2012	1	21	5	0	0	8.85
2012	1	21	6	0	0	7.85
2012	1	21	7	0	0	8.85
2012	1	21	8	0	41	8.85
2012	1	21	9	0	178	9.85
2012	1	21	10	0	293	9.85
2012	1	21	11	0	470	10.85
2012	1	21	12	0	642	10.85
2012	1	21	13	0	670	10.85
2012	1	21	14	0	616	10.85
2012	1	21	15	0	466	11.85
2012	1	21	16	0	318	11.85
2012	1	21	17	0	125	11.85
2012	1	21	18	0	0	11.85
2012	1	21	19	0	0	10.85
2012	1	21	20	0	0	10.85
2012	1	21	21	0	0	9.85
2012	1	21	22	0	0	9.85
2012	1	21	23	0	0	8.85
2012	1	22	0	0	0	8.85
2012	1	22	1	0	0	9.85
2012	1	22	2	0	0	10.85
2012	1	22	3	0	0	10.85
2012	1	22	4	0	0	11.85
2012	1	22	5	0	0	12.85
2012	1	22	6	0	0	13.85
2012	1	22	7	0	0	14.85
2012	1	22	8	0	30	14.85
2012	1	22	9	0	103	15.85
2012	1	22	10	0	120	16.85
2012	1	22	11	0	66	17.85
2012	1	22	12	0	103	17.85
2012	1	22	13	0	241	18.85
2012	1	22	14	0	450	18.85
2012	1	22	15	0	518	19.85
2012	1	22	16	0	346	19.85
2012	1	22	17	0	139	19.85
2012	1	22	18	0	0	19.85
2012	1	22	19	0	0	19.85
2012	1	22	20	0	0	18.85
2012	1	22	21	0	0	17.85
2012	1	22	22	0	0	16.85
2012	1	22	23	0	0	15.85
2012	1	23	0	0	0	15.85
2012	1	23	1	0	0	13.85
2012	1	23	2	0	0	12.85
2012	1	23	3	0	0	11.85
2012	1	23	4	0	0	10.85
2012	1	23	5	0	0	9.85
2012	1	23	6	0	0	8.85
2012	1	23	7	0	0	9.85
2012	1	23	8	0	59	10.85
2012	1	23	9	0	243	11.85
2012	1	23	10	0	426	11.85
2012	1	23	11	0	473	12.85
2012	1	23	12	0	624	13.85
2012	1	23	13	0	695	13.85
2012	1	23	14	0	640	13.85
2012	1	23	15	0	520	13.85
2012	1	23	16	0	347	13.85
2012	1	23	17	0	141	14.85
2012	1	23	18	0	0	14.85
2012	1	23	19	0	0	13.85
2012	1	23	20	0	0	13.85
2012	1	23	21	0	0	12.85
2012	1	23	22	0	0	12.85
2012	1	23	23	0	0	11.85
2012	1	24	0	0	0	11.85
2012	1	24	1	0	0	11.85
2012	1	24	2	0	0	11.85
2012	1	24	3	0	0	10.85
2012	1	24	4	0	0	10.85
2012	1	24	5	0	0	10.85
2012	1	24	6	0	0	10.85
2012	1	24	7	0	0	11.85
2012	1	24	8	0	14	11.85
2012	1	24	9	0	52	11.85
2012	1	24	10	0	132	12.85
2012	1	24	11	0	141	12.85
2012	1	24	12	0	104	13.85
2012	1	24	13	0	25	13.85
2012	1	24	14	0	19	14.85
2012	1	24	15	0	14	15.85
2012	1	24	16	0	99	15.85
2012	1	24	17	0	92	16.85
2012	1	24	18	0	0	16.85
2012	1	24	19	0	0	16.85
2012	1	24	20	0	0	16.85
2012	1	24	21	0	0	16.85
2012	1	24	22	0	0	16.85
2012	1	24	23	0	0	17.85
2012	1	25	0	0	0	17.85
2012	1	25	1	0	0	17.85
2012	1	25	2	0	0	17.85
2012	1	25	3	0	0	17.85
2012	1	25	4	0	0	17.85
2012	1	25	5	0	0	18.85
2012	1	25	6	0	0	18.85
2012	1	25	7	0	0	17.85
2012	1	25	8	0	13	16.85
2012	1	25	9	0	117	16.85
2012	1	25	10	0	119	15.85
2012	1	25	11	0	157	15.85
2012	1	25	12	0	169	14.85
2012	1	25	13	0	156	13.85
2012	1	25	14	0	167	13.85
2012	1	25	15	0	108	12.85
2012	1	25	16	0	214	11.85
2012	1	25	17	0	91	10.85
2012	1	25	18	0	0	9.85
2012	1	25	19	0	0	9.85
2012	1	25	20	0	0	9.85
2012	1	25	21	0	0	8.85
2012	1	25	22	0	0	8.85
2012	1	25	23	0	0	8.85
2012	1	26	0	0	0	8.85
2012	1	26	1	0	0	8.85
2012	1	26	2	0	0	7.85
2012	1	26	3	0	0	7.85
2012	1	26	4	0	0	7.85
2012	1	26	5	0	0	7.85
2012	1	26	6	0	0	7.85
2012	1	26	7	0	0	9.85
2012	1	26	8	0	66	10.85
2012	1	26	9	0	267	11.85
2012	1	26	10	0	458	12.85
2012	1	26	11	0	605	13.85
2012	1	26	12	0	689	14.85
2012	1	26	13	0	705	14.85
2012	1	26	14	0	651	14.85
2012	1	26	15	0	532	14.85
2012	1	26	16	0	359	14.85
2012	1	26	17	0	152	14.85
2012	1	26	18	0	0	14.85
2012	1	26	19	0	0	14.85
2012	1	26	20	0	0	13.85
2012	1	26	21	0	0	13.85
2012	1	26	22	0	0	12.85
2012	1	26	23	0	0	12.85
2012	1	27	0	0	0	11.85
2012	1	27	1	0	0	11.85
2012	1	27	2	0	0	10.85
2012	1	27	3	0	0	10.85
2012	1	27	4	0	0	10.85
2012	1	27	5	0	0	9.85
2012	1	27	6	0	0	9.85
2012	1	27	7	0	0	10.85
2012	1	27	8	0	67	11.85
2012	1	27	9	0	271	12.85
2012	1	27	10	0	464	12.85
2012	1	27	11	0	610	13.85
2012	1	27	12	0	696	14.85
2012	1	27	13	0	713	14.85
2012	1	27	14	0	659	14.85
2012	1	27	15	0	539	15.85
2012	1	27	16	0	365	15.85
2012	1	27	17	0	155	15.85
2012	1	27	18	0	0	15.85
2012	1	27	19	0	0	15.85
2012	1	27	20	0	0	15.85
2012	1	27	21	0	0	14.85
2012	1	27	22	0	0	14.85
2012	1	27	23	0	0	13.85
2012	1	28	0	0	0	13.85
2012	1	28	1	0	0	11.85
2012	1	28	2	0	0	10.85
2012	1	28	3	0	0	9.85
2012	1	28	4	0	0	8.85
2012	1	28	5	0	0	7.85
2012	1	28	6	0	0	6.85
2012	1	28	7	0	0	6.85
2012	1	28	8	0	70	7.85
2012	1	28	9	0	278	7.85
2012	1	28	10	0	473	8.85
2012	1	28	11	0	623	8.85
2012	1	28	12	0	681	8.85
2012	1	28	13	0	696	8.85
2012	1	28	14	0	674	8.85
2012	1	28	15	0	506	7.85
2012	1	28	16	0	376	7.85
2012	1	28	17	0	152	7.85
2012	1	28	18	0	0	7.85
2012	1	28	19	0	0	6.85
2012	1	28	20	0	0	6.85
2012	1	28	21	0	0	6.85
2012	1	28	22	0	0	6.85
2012	1	28	23	0	0	5.85
2012	1	29	0	0	0	5.85
2012	1	29	1	0	0	5.85
2012	1	29	2	0	0	5.85
2012	1	29	3	0	0	4.85
2012	1	29	4	0	0	4.85
2012	1	29	5	0	0	4.85
2012	1	29	6	0	0	4.85
2012	1	29	7	0	0	5.85
2012	1	29	8	0	72	6.85
2012	1	29	9	0	280	6.85
2012	1	29	10	0	475	7.85
2012	1	29	11	0	624	8.85
2012	1	29	12	0	711	9.85
2012	1	29	13	0	727	10.85
2012	1	29	14	0	673	10.85
2012	1	29	15	0	552	11.85
2012	1	29	16	0	375	11.85
2012	1	29	17	0	165	12.85
2012	1	29	18	0	0	12.85
2012	1	29	19	0	0	11.85
2012	1	29	20	0	0	11.85
2012	1	29	21	0	0	10.85
2012	1	29	22	0	0	10.85
2012	1	29	23	0	0	10.85
2012	1	30	0	0	0	9.85
2012	1	30	1	0	0	9.85
2012	1	30	2	0	0	8.85
2012	1	30	3	0	0	8.85
2012	1	30	4	0	0	8.85
2012	1	30	5	0	0	7.85
2012	1	30	6	0	0	7.85
2012	1	30	7	0	0	8.85
2012	1	30	8	0	70	9.85
2012	1	30	9	0	209	10.85
2012	1	30	10	0	460	12.85
2012	1	30	11	0	276	13.85
2012	1	30	12	0	158	14.85
2012	1	30	13	0	540	14.85
2012	1	30	14	0	125	14.85
2012	1	30	15	0	133	14.85
2012	1	30	16	0	171	14.85
2012	1	30	17	0	120	14.85
2012	1	30	18	0	0	14.85
2012	1	30	19	0	0	14.85
2012	1	30	20	0	0	14.85
2012	1	30	21	0	0	14.85
2012	1	30	22	0	0	14.85
2012	1	30	23	0	0	14.85
2012	1	31	0	0	0	14.85
2012	1	31	1	0	0	14.85
2012	1	31	2	0	0	14.85
2012	1	31	3	0	0	14.85
2012	1	31	4	0	0	14.85
2012	1	31	5	0	0	14.85
2012	1	31	6	0	0	15.85
2012	1	31	7	0	0	15.85
2012	1	31	8	0	15	15.85
2012	1	31	9	0	70	15.85
2012	1	31	10	0	29	16.85
2012	1	31	11	0	336	16.85
2012	1	31	12	0	491	17.85
2012	1	31	13	0	444	17.85
2012	1	31	14	0	492	17.85
2012	1	31	15	0	532	17.85
2012	1	31	16	0	363	17.85
2012	1	31	17	0	135	18.85
2012	1	31	18	0	0	18.85
2012	1	31	19	0	0	17.85
2012	1	31	20	0	0	17.85
2012	1	31	21	0	0	16.85
2012	1	31	22	0	0	16.85
2012	1	31	23	0	0	16.85
2012	2	1	0	0	0	15.85
2012	2	1	1	0	0	15.85
2012	2	1	2	0	0	15.85
2012	2	1	3	0	0	15.85
2012	2	1	4	0	0	15.85
2012	2	1	5	0	0	15.85
2012	2	1	6	0	0	15.85
2012	2	1	7	0	0	16.85
2012	2	1	8	0	19	17.85
2012	2	1	9	0	59	17.85
2012	2	1	10	0	397	18.85
2012	2	1	11	0	607	19.85
2012	2	1	12	0	488	19.85
2012	2	1	13	0	709	20.85
2012	2	1	14	0	656	20.85
2012	2	1	15	0	541	20.85
2012	2	1	16	0	370	21.85
2012	2	1	17	0	167	21.85
2012	2	1	18	0	0	21.85
2012	2	1	19	0	0	20.85
2012	2	1	20	0	0	20.85
2012	2	1	21	0	0	19.85
2012	2	1	22	0	0	18.85
2012	2	1	23	0	0	18.85
2012	2	2	0	0	0	17.85
2012	2	2	1	0	0	16.85
2012	2	2	2	0	0	16.85
2012	2	2	3	0	0	15.85
2012	2	2	4	0	0	15.85
2012	2	2	5	0	0	15.85
2012	2	2	6	0	0	15.85
2012	2	2	7	0	0	15.85
2012	2	2	8	0	32	16.85
2012	2	2	9	0	86	17.85
2012	2	2	10	0	155	17.85
2012	2	2	11	0	120	18.85
2012	2	2	12	0	273	19.85
2012	2	2	13	0	270	18.85
2012	2	2	14	0	295	18.85
2012	2	2	15	0	66	18.85
2012	2	2	16	0	228	18.85
2012	2	2	17	0	151	17.85
2012	2	2	18	0	0	17.85
2012	2	2	19	0	0	17.85
2012	2	2	20	0	0	17.85
2012	2	2	21	0	0	17.85
2012	2	2	22	0	0	17.85
2012	2	2	23	0	0	17.85
2012	2	3	0	0	0	17.85
2012	2	3	1	0	0	17.85
2012	2	3	2	0	0	17.85
2012	2	3	3	0	0	17.85
2012	2	3	4	0	0	17.85
2012	2	3	5	0	0	17.85
2012	2	3	6	0	0	17.85
2012	2	3	7	0	0	18.85
2012	2	3	8	0	12	18.85
2012	2	3	9	0	76	19.85
2012	2	3	10	0	152	20.85
2012	2	3	11	0	61	20.85
2012	2	3	12	0	377	21.85
2012	2	3	13	0	143	21.85
2012	2	3	14	0	195	20.85
2012	2	3	15	0	423	20.85
2012	2	3	16	0	177	20.85
2012	2	3	17	0	132	19.85
2012	2	3	18	0	0	19.85
2012	2	3	19	0	0	19.85
2012	2	3	20	0	0	19.85
2012	2	3	21	0	0	18.85
2012	2	3	22	0	0	18.85
2012	2	3	23	0	0	18.85
2012	2	4	0	0	0	17.85
2012	2	4	1	0	0	16.85
2012	2	4	2	0	0	14.85
2012	2	4	3	0	0	13.85
2012	2	4	4	0	0	11.85
2012	2	4	5	0	0	9.85
2012	2	4	6	0	0	8.85
2012	2	4	7	0	0	8.85
2012	2	4	8	0	2	9.85
2012	2	4	9	0	100	9.85
2012	2	4	10	0	256	9.85
2012	2	4	11	0	147	9.85
2012	2	4	12	0	676	9.85
2012	2	4	13	0	247	10.85
2012	2	4	14	0	315	10.85
2012	2	4	15	0	531	10.85
2012	2	4	16	0	180	10.85
2012	2	4	17	0	187	10.85
2012	2	4	18	0	0	11.85
2012	2	4	19	0	0	10.85
2012	2	4	20	0	0	9.85
2012	2	4	21	0	0	9.85
2012	2	4	22	0	0	8.85
2012	2	4	23	0	0	8.85
2012	2	5	0	0	0	7.85
2012	2	5	1	0	0	7.85
2012	2	5	2	0	0	6.85
2012	2	5	3	0	0	6.85
2012	2	5	4	0	0	6.85
2012	2	5	5	0	0	6.85
2012	2	5	6	0	0	5.85
2012	2	5	7	0	0	6.85
2012	2	5	8	0	21	6.85
2012	2	5	9	0	89	6.85
2012	2	5	10	0	111	6.85
2012	2	5	11	0	228	6.85
2012	2	5	12	0	168	6.85
2012	2	5	13	0	214	6.85
2012	2	5	14	0	320	6.85
2012	2	5	15	0	183	6.85
2012	2	5	16	0	206	6.85
2012	2	5	17	0	90	7.85
2012	2	5	18	0	0	7.85
2012	2	5	19	0	0	6.85
2012	2	5	20	0	0	6.85
2012	2	5	21	0	0	6.85
2012	2	5	22	0	0	6.85
2012	2	5	23	0	0	5.85
2012	2	6	0	0	0	5.85
2012	2	6	1	0	0	5.85
2012	2	6	2	0	0	5.85
2012	2	6	3	0	0	4.85
2012	2	6	4	0	0	4.85
2012	2	6	5	0	0	4.85
2012	2	6	6	0	0	4.85
2012	2	6	7	0	0	4.85
2012	2	6	8	0	54	5.85
2012	2	6	9	0	239	5.85
2012	2	6	10	0	206	5.85
2012	2	6	11	0	419	6.85
2012	2	6	12	0	488	6.85
2012	2	6	13	0	491	6.85
2012	2	6	14	0	25	6.85
2012	2	6	15	0	79	6.85
2012	2	6	16	0	263	6.85
2012	2	6	17	0	197	7.85
2012	2	6	18	0	0	7.85
2012	2	6	19	0	0	7.85
2012	2	6	20	0	0	7.85
2012	2	6	21	0	0	7.85
2012	2	6	22	0	0	7.85
2012	2	6	23	0	0	7.85
2012	2	7	0	0	0	7.85
2012	2	7	1	0	0	6.85
2012	2	7	2	0	0	6.85
2012	2	7	3	0	0	6.85
2012	2	7	4	0	0	6.85
2012	2	7	5	0	0	6.85
2012	2	7	6	0	0	6.85
2012	2	7	7	0	0	7.85
2012	2	7	8	0	93	8.85
2012	2	7	9	0	308	9.85
2012	2	7	10	0	507	9.85
2012	2	7	11	0	457	10.85
2012	2	7	12	0	746	11.85
2012	2	7	13	0	764	11.85
2012	2	7	14	0	710	12.85
2012	2	7	15	0	590	12.85
2012	2	7	16	0	413	12.85
2012	2	7	17	0	199	13.85
2012	2	7	18	0	0	13.85
2012	2	7	19	0	0	12.85
2012	2	7	20	0	0	11.85
2012	2	7	21	0	0	10.85
2012	2	7	22	0	0	10.85
2012	2	7	23	0	0	9.85
2012	2	8	0	0	0	8.85
2012	2	8	1	0	0	7.85
2012	2	8	2	0	0	7.85
2012	2	8	3	0	0	6.85
2012	2	8	4	0	0	6.85
2012	2	8	5	0	0	5.85
2012	2	8	6	0	0	5.85
2012	2	8	7	0	0	5.85
2012	2	8	8	0	62	6.85
2012	2	8	9	0	214	6.85
2012	2	8	10	0	426	6.85
2012	2	8	11	0	496	7.85
2012	2	8	12	0	617	7.85
2012	2	8	13	0	677	7.85
2012	2	8	14	0	495	7.85
2012	2	8	15	0	553	7.85
2012	2	8	16	0	345	7.85
2012	2	8	17	0	203	7.85
2012	2	8	18	0	0	7.85
2012	2	8	19	0	0	6.85
2012	2	8	20	0	0	6.85
2012	2	8	21	0	0	6.85
2012	2	8	22	0	0	6.85
2012	2	8	23	0	0	6.85
2012	2	9	0	0	0	5.85
2012	2	9	1	0	0	5.85
2012	2	9	2	0	0	5.85
2012	2	9	3	0	0	4.85
2012	2	9	4	0	0	4.85
2012	2	9	5	0	0	3.85
2012	2	9	6	0	0	3.85
2012	2	9	7	0	0	5.85
2012	2	9	8	0	98	6.85
2012	2	9	9	0	315	6.85
2012	2	9	10	0	470	7.85
2012	2	9	11	0	612	8.85
2012	2	9	12	0	631	9.85
2012	2	9	13	0	583	9.85
2012	2	9	14	0	461	9.85
2012	2	9	15	0	210	9.85
2012	2	9	16	0	226	9.85
2012	2	9	17	0	85	9.85
2012	2	9	18	0	0	9.85
2012	2	9	19	0	0	9.85
2012	2	9	20	0	0	9.85
2012	2	9	21	0	0	9.85
2012	2	9	22	0	0	9.85
2012	2	9	23	0	0	8.85
2012	2	10	0	0	0	8.85
2012	2	10	1	0	0	8.85
2012	2	10	2	0	0	8.85
2012	2	10	3	0	0	8.85
2012	2	10	4	0	0	8.85
2012	2	10	5	0	0	9.85
2012	2	10	6	0	0	9.85
2012	2	10	7	0	0	9.85
2012	2	10	8	0	49	10.85
2012	2	10	9	0	7	11.85
2012	2	10	10	0	340	11.85
2012	2	10	11	0	88	12.85
2012	2	10	12	0	572	12.85
2012	2	10	13	0	788	12.85
2012	2	10	14	0	734	12.85
2012	2	10	15	0	613	12.85
2012	2	10	16	0	433	12.85
2012	2	10	17	0	215	12.85
2012	2	10	18	0	0	12.85
2012	2	10	19	0	0	11.85
2012	2	10	20	0	0	10.85
2012	2	10	21	0	0	9.85
2012	2	10	22	0	0	8.85
2012	2	10	23	0	0	7.85
2012	2	11	0	0	0	6.85
2012	2	11	1	0	0	6.85
2012	2	11	2	0	0	5.85
2012	2	11	3	0	0	4.85
2012	2	11	4	0	0	3.85
2012	2	11	5	0	0	2.85
2012	2	11	6	0	0	1.85
2012	2	11	7	0	0	2.85
2012	2	11	8	0	108	2.85
2012	2	11	9	0	334	3.85
2012	2	11	10	0	540	3.85
2012	2	11	11	0	696	4.85
2012	2	11	12	0	788	4.85
2012	2	11	13	0	808	4.85
2012	2	11	14	0	754	4.85
2012	2	11	15	0	632	4.85
2012	2	11	16	0	449	4.85
2012	2	11	17	0	226	4.85
2012	2	11	18	0	0	4.85
2012	2	11	19	0	0	3.85
2012	2	11	20	0	0	3.85
2012	2	11	21	0	0	2.85
2012	2	11	22	0	0	1.85
2012	2	11	23	0	0	0.85
2012	2	12	0	0	0	0.85
2012	2	12	1	0	0	-0.15
2012	2	12	2	0	0	-0.15
2012	2	12	3	0	0	-0.15
2012	2	12	4	0	0	-1.15
2012	2	12	5	0	0	-1.15
2012	2	12	6	0	0	-1.15
2012	2	12	7	0	0	-1.15
2012	2	12	8	0	77	-0.15
2012	2	12	9	0	197	0.85
2012	2	12	10	0	368	1.85
2012	2	12	11	0	578	2.85
2012	2	12	12	0	242	2.85
2012	2	12	13	0	23	2.85
2012	2	12	14	0	307	2.85
2012	2	12	15	0	207	3.85
2012	2	12	16	0	249	3.85
2012	2	12	17	0	142	3.85
2012	2	12	18	0	0	3.85
2012	2	12	19	0	0	3.85
2012	2	12	20	0	0	3.85
2012	2	12	21	0	0	3.85
2012	2	12	22	0	0	3.85
2012	2	12	23	0	0	3.85
2012	2	13	0	0	0	3.85
2012	2	13	1	0	0	3.85
2012	2	13	2	0	0	3.85
2012	2	13	3	0	0	3.85
2012	2	13	4	0	0	3.85
2012	2	13	5	0	0	4.85
2012	2	13	6	0	0	4.85
2012	2	13	7	0	0	5.85
2012	2	13	8	0	2	6.85
2012	2	13	9	0	175	6.85
2012	2	13	10	0	232	7.85
2012	2	13	11	0	275	8.85
2012	2	13	12	0	418	9.85
2012	2	13	13	0	330	10.85
2012	2	13	14	0	726	12.85
2012	2	13	15	0	605	13.85
2012	2	13	16	0	430	14.85
2012	2	13	17	0	216	15.85
2012	2	13	18	0	0	16.85
2012	2	13	19	0	0	15.85
2012	2	13	20	0	0	14.85
2012	2	13	21	0	0	13.85
2012	2	13	22	0	0	12.85
2012	2	13	23	0	0	11.85
2012	2	14	0	0	0	11.85
2012	2	14	1	0	0	10.85
2012	2	14	2	0	0	10.85
2012	2	14	3	0	0	10.85
2012	2	14	4	0	0	10.85
2012	2	14	5	0	0	9.85
2012	2	14	6	0	0	10.85
2012	2	14	7	0	0	11.85
2012	2	14	8	0	109	12.85
2012	2	14	9	0	323	13.85
2012	2	14	10	0	519	15.85
2012	2	14	11	0	668	16.85
2012	2	14	12	0	755	17.85
2012	2	14	13	0	772	17.85
2012	2	14	14	0	719	17.85
2012	2	14	15	0	600	17.85
2012	2	14	16	0	308	17.85
2012	2	14	17	0	162	17.85
2012	2	14	18	0	0	17.85
2012	2	14	19	0	0	17.85
2012	2	14	20	0	0	17.85
2012	2	14	21	0	0	17.85
2012	2	14	22	0	0	17.85
2012	2	14	23	0	0	16.85
2012	2	15	0	0	0	16.85
2012	2	15	1	0	0	16.85
2012	2	15	2	0	0	16.85
2012	2	15	3	0	0	16.85
2012	2	15	4	0	0	16.85
2012	2	15	5	0	0	16.85
2012	2	15	6	0	0	16.85
2012	2	15	7	0	0	17.85
2012	2	15	8	0	70	17.85
2012	2	15	9	0	161	18.85
2012	2	15	10	0	323	18.85
2012	2	15	11	0	530	19.85
2012	2	15	12	0	756	19.85
2012	2	15	13	0	721	19.85
2012	2	15	14	0	645	19.85
2012	2	15	15	0	447	20.85
2012	2	15	16	0	429	20.85
2012	2	15	17	0	218	20.85
2012	2	15	18	0	0	20.85
2012	2	15	19	0	0	19.85
2012	2	15	20	0	0	18.85
2012	2	15	21	0	0	17.85
2012	2	15	22	0	0	17.85
2012	2	15	23	0	0	16.85
2012	2	16	0	0	0	15.85
2012	2	16	1	0	0	14.85
2012	2	16	2	0	0	13.85
2012	2	16	3	0	0	12.85
2012	2	16	4	0	0	11.85
2012	2	16	5	0	0	9.85
2012	2	16	6	0	0	9.85
2012	2	16	7	0	0	9.85
2012	2	16	8	0	70	10.85
2012	2	16	9	0	10	11.85
2012	2	16	10	0	190	12.85
2012	2	16	11	0	419	12.85
2012	2	16	12	0	452	13.85
2012	2	16	13	0	420	13.85
2012	2	16	14	0	480	13.85
2012	2	16	15	0	461	13.85
2012	2	16	16	0	250	13.85
2012	2	16	17	0	89	13.85
2012	2	16	18	0	0	13.85
2012	2	16	19	0	0	13.85
2012	2	16	20	0	0	12.85
2012	2	16	21	0	0	11.85
2012	2	16	22	0	0	11.85
2012	2	16	23	0	0	10.85
2012	2	17	0	0	0	10.85
2012	2	17	1	0	0	10.85
2012	2	17	2	0	0	10.85
2012	2	17	3	0	0	10.85
2012	2	17	4	0	0	10.85
2012	2	17	5	0	0	10.85
2012	2	17	6	0	0	10.85
2012	2	17	7	0	0	10.85
2012	2	17	8	0	17	10.85
2012	2	17	9	0	88	11.85
2012	2	17	10	0	201	11.85
2012	2	17	11	0	126	11.85
2012	2	17	12	0	157	12.85
2012	2	17	13	0	178	11.85
2012	2	17	14	0	65	11.85
2012	2	17	15	0	76	11.85
2012	2	17	16	0	134	11.85
2012	2	17	17	0	147	11.85
2012	2	17	18	0	0	11.85
2012	2	17	19	0	0	11.85
2012	2	17	20	0	0	11.85
2012	2	17	21	0	0	11.85
2012	2	17	22	0	0	12.85
2012	2	17	23	0	0	12.85
2012	2	18	0	0	0	12.85
2012	2	18	1	0	0	12.85
2012	2	18	2	0	0	12.85
2012	2	18	3	0	0	12.85
2012	2	18	4	0	0	12.85
2012	2	18	5	0	0	12.85
2012	2	18	6	0	0	12.85
2012	2	18	7	0	0	11.85
2012	2	18	8	0	2	11.85
2012	2	18	9	0	103	11.85
2012	2	18	10	0	105	11.85
2012	2	18	11	0	130	11.85
2012	2	18	12	0	21	10.85
2012	2	18	13	0	160	10.85
2012	2	18	14	0	137	10.85
2012	2	18	15	0	86	9.85
2012	2	18	16	0	13	9.85
2012	2	18	17	0	148	9.85
2012	2	18	18	0	0	8.85
2012	2	18	19	0	0	8.85
2012	2	18	20	0	0	8.85
2012	2	18	21	0	0	8.85
2012	2	18	22	0	0	7.85
2012	2	18	23	0	0	7.85
2012	2	19	0	0	0	7.85
2012	2	19	1	0	0	6.85
2012	2	19	2	0	0	6.85
2012	2	19	3	0	0	6.85
2012	2	19	4	0	0	6.85
2012	2	19	5	0	0	6.85
2012	2	19	6	0	0	6.85
2012	2	19	7	0	0	7.85
2012	2	19	8	0	128	7.85
2012	2	19	9	0	175	8.85
2012	2	19	10	0	546	9.85
2012	2	19	11	0	696	10.85
2012	2	19	12	0	784	10.85
2012	2	19	13	0	760	11.85
2012	2	19	14	0	747	11.85
2012	2	19	15	0	564	11.85
2012	2	19	16	0	397	11.85
2012	2	19	17	0	215	11.85
2012	2	19	18	0	0	11.85
2012	2	19	19	0	0	11.85
2012	2	19	20	0	0	10.85
2012	2	19	21	0	0	10.85
2012	2	19	22	0	0	9.85
2012	2	19	23	0	0	9.85
2012	2	20	0	0	0	8.85
2012	2	20	1	0	0	8.85
2012	2	20	2	0	0	8.85
2012	2	20	3	0	0	8.85
2012	2	20	4	0	0	8.85
2012	2	20	5	0	0	8.85
2012	2	20	6	0	0	9.85
2012	2	20	7	0	0	9.85
2012	2	20	8	0	84	10.85
2012	2	20	9	0	58	10.85
2012	2	20	10	0	18	11.85
2012	2	20	11	0	180	11.85
2012	2	20	12	0	554	12.85
2012	2	20	13	0	802	12.85
2012	2	20	14	0	748	13.85
2012	2	20	15	0	627	14.85
2012	2	20	16	0	451	14.85
2012	2	20	17	0	236	15.85
2012	2	20	18	0	0	15.85
2012	2	20	19	0	0	15.85
2012	2	20	20	0	0	15.85
2012	2	20	21	0	0	14.85
2012	2	20	22	0	0	14.85
2012	2	20	23	0	0	14.85
2012	2	21	0	0	0	13.85
2012	2	21	1	0	0	13.85
2012	2	21	2	0	0	13.85
2012	2	21	3	0	0	12.85
2012	2	21	4	0	0	12.85
2012	2	21	5	0	0	12.85
2012	2	21	6	0	0	12.85
2012	2	21	7	0	0	13.85
2012	2	21	8	0	61	13.85
2012	2	21	9	0	353	14.85
2012	2	21	10	0	551	15.85
2012	2	21	11	0	701	16.85
2012	2	21	12	0	788	16.85
2012	2	21	13	0	806	16.85
2012	2	21	14	0	752	17.85
2012	2	21	15	0	631	17.85
2012	2	21	16	0	455	17.85
2012	2	21	17	0	241	17.85
2012	2	21	18	0	0	17.85
2012	2	21	19	0	0	17.85
2012	2	21	20	0	0	16.85
2012	2	21	21	0	0	16.85
2012	2	21	22	0	0	16.85
2012	2	21	23	0	0	15.85
2012	2	22	0	0	0	15.85
2012	2	22	1	0	0	15.85
2012	2	22	2	0	0	15.85
2012	2	22	3	0	0	15.85
2012	2	22	4	0	0	16.85
2012	2	22	5	0	0	16.85
2012	2	22	6	0	0	16.85
[truncated: 161 more rows]

## Sheet: NREL_summer
Year	Month	Day	Hour	Minute	GHI	Temp
2012	6	1	0	0	0	23.85
2012	6	1	1	0	0	22.85
2012	6	1	2	0	0	21.85
2012	6	1	3	0	0	21.85
2012	6	1	4	0	0	20.85
2012	6	1	5	0	0	19.85
2012	6	1	6	0	44	19.85
2012	6	1	7	0	238	21.85
2012	6	1	8	0	461	22.85
2012	6	1	9	0	669	23.85
2012	6	1	10	0	841	25.85
2012	6	1	11	0	964	26.85
2012	6	1	12	0	1026	27.85
2012	6	1	13	0	1024	28.85
2012	6	1	14	0	958	28.85
2012	6	1	15	0	833	29.85
2012	6	1	16	0	659	29.85
2012	6	1	17	0	449	30.85
2012	6	1	18	0	226	30.85
2012	6	1	19	0	44	29.85
2012	6	1	20	0	0	28.85
2012	6	1	21	0	0	26.85
2012	6	1	22	0	0	25.85
2012	6	1	23	0	0	24.85
2012	6	2	0	0	0	23.85
2012	6	2	1	0	0	23.85
2012	6	2	2	0	0	22.85
2012	6	2	3	0	0	22.85
2012	6	2	4	0	0	21.85
2012	6	2	5	0	0	21.85
2012	6	2	6	0	36	20.85
2012	6	2	7	0	237	22.85
2012	6	2	8	0	339	23.85
2012	6	2	9	0	663	25.85
2012	6	2	10	0	835	27.85
2012	6	2	11	0	957	29.85
2012	6	2	12	0	1019	30.85
2012	6	2	13	0	1017	30.85
2012	6	2	14	0	952	31.85
2012	6	2	15	0	782	31.85
2012	6	2	16	0	624	32.85
2012	6	2	17	0	424	32.85
2012	6	2	18	0	198	32.85
2012	6	2	19	0	37	30.85
2012	6	2	20	0	0	29.85
2012	6	2	21	0	0	27.85
2012	6	2	22	0	0	26.85
2012	6	2	23	0	0	24.85
2012	6	3	0	0	0	23.85
2012	6	3	1	0	0	23.85
2012	6	3	2	0	0	22.85
2012	6	3	3	0	0	22.85
2012	6	3	4	0	0	21.85
2012	6	3	5	0	0	21.85
2012	6	3	6	0	41	21.85
2012	6	3	7	0	193	22.85
2012	6	3	8	0	279	24.85
2012	6	3	9	0	441	25.85
2012	6	3	10	0	708	27.85
2012	6	3	11	0	679	29.85
2012	6	3	12	0	977	30.85
2012	6	3	13	0	805	31.85
2012	6	3	14	0	331	31.85
2012	6	3	15	0	611	31.85
2012	6	3	16	0	277	31.85
2012	6	3	17	0	227	32.85
2012	6	3	18	0	80	31.85
2012	6	3	19	0	16	30.85
2012	6	3	20	0	0	28.85
2012	6	3	21	0	0	27.85
2012	6	3	22	0	0	26.85
2012	6	3	23	0	0	24.85
2012	6	4	0	0	0	23.85
2012	6	4	1	0	0	23.85
2012	6	4	2	0	0	22.85
2012	6	4	3	0	0	22.85
2012	6	4	4	0	0	21.85
2012	6	4	5	0	0	21.85
2012	6	4	6	0	29	21.85
2012	6	4	7	0	186	23.85
2012	6	4	8	0	173	24.85
2012	6	4	9	0	223	26.85
2012	6	4	10	0	684	27.85
2012	6	4	11	0	605	29.85
2012	6	4	12	0	782	30.85
2012	6	4	13	0	809	31.85
2012	6	4	14	0	627	31.85
2012	6	4	15	0	826	31.85
2012	6	4	16	0	617	31.85
2012	6	4	17	0	163	32.85
2012	6	4	18	0	69	32.85
2012	6	4	19	0	14	30.85
2012	6	4	20	0	0	29.85
2012	6	4	21	0	0	28.85
2012	6	4	22	0	0	27.85
2012	6	4	23	0	0	25.85
2012	6	5	0	0	0	24.85
2012	6	5	1	0	0	24.85
2012	6	5	2	0	0	23.85
2012	6	5	3	0	0	23.85
2012	6	5	4	0	0	22.85
2012	6	5	5	0	0	21.85
2012	6	5	6	0	45	21.85
2012	6	5	7	0	204	23.85
2012	6	5	8	0	324	24.85
2012	6	5	9	0	662	26.85
2012	6	5	10	0	833	28.85
2012	6	5	11	0	955	30.85
2012	6	5	12	0	1018	31.85
2012	6	5	13	0	1018	31.85
2012	6	5	14	0	953	32.85
2012	6	5	15	0	780	32.85
2012	6	5	16	0	658	32.85
2012	6	5	17	0	423	32.85
2012	6	5	18	0	195	32.85
2012	6	5	19	0	38	31.85
2012	6	5	20	0	0	30.85
2012	6	5	21	0	0	29.85
2012	6	5	22	0	0	27.85
2012	6	5	23	0	0	26.85
2012	6	6	0	0	0	25.85
2012	6	6	1	0	0	25.85
2012	6	6	2	0	0	24.85
2012	6	6	3	0	0	23.85
2012	6	6	4	0	0	23.85
2012	6	6	5	0	0	23.85
2012	6	6	6	0	45	23.85
2012	6	6	7	0	237	24.85
2012	6	6	8	0	456	26.85
2012	6	6	9	0	662	27.85
2012	6	6	10	0	799	29.85
2012	6	6	11	0	781	31.85
2012	6	6	12	0	814	32.85
2012	6	6	13	0	701	32.85
2012	6	6	14	0	954	32.85
2012	6	6	15	0	831	33.85
2012	6	6	16	0	659	33.85
2012	6	6	17	0	452	33.85
2012	6	6	18	0	232	33.85
2012	6	6	19	0	47	32.85
2012	6	6	20	0	0	31.85
2012	6	6	21	0	0	29.85
2012	6	6	22	0	0	28.85
2012	6	6	23	0	0	26.85
2012	6	7	0	0	0	25.85
2012	6	7	1	0	0	24.85
2012	6	7	2	0	0	23.85
2012	6	7	3	0	0	23.85
2012	6	7	4	0	0	22.85
2012	6	7	5	0	0	21.85
2012	6	7	6	0	28	21.85
2012	6	7	7	0	130	22.85
2012	6	7	8	0	363	23.85
2012	6	7	9	0	620	23.85
2012	6	7	10	0	423	24.85
2012	6	7	11	0	857	25.85
2012	6	7	12	0	931	26.85
2012	6	7	13	0	1013	26.85
2012	6	7	14	0	677	26.85
2012	6	7	15	0	717	26.85
2012	6	7	16	0	616	27.85
2012	6	7	17	0	161	27.85
2012	6	7	18	0	212	27.85
2012	6	7	19	0	42	26.85
2012	6	7	20	0	0	25.85
2012	6	7	21	0	0	24.85
2012	6	7	22	0	0	23.85
2012	6	7	23	0	0	22.85
2012	6	8	0	0	0	21.85
2012	6	8	1	0	0	21.85
2012	6	8	2	0	0	21.85
2012	6	8	3	0	0	20.85
2012	6	8	4	0	0	20.85
2012	6	8	5	0	0	20.85
2012	6	8	6	0	29	20.85
2012	6	8	7	0	74	21.85
2012	6	8	8	0	193	22.85
2012	6	8	9	0	275	23.85
2012	6	8	10	0	336	23.85
2012	6	8	11	0	657	24.85
2012	6	8	12	0	232	24.85
2012	6	8	13	0	497	25.85
2012	6	8	14	0	588	25.85
2012	6	8	15	0	522	25.85
2012	6	8	16	0	313	25.85
2012	6	8	17	0	410	26.85
2012	6	8	18	0	232	25.85
2012	6	8	19	0	47	25.85
2012	6	8	20	0	0	24.85
2012	6	8	21	0	0	23.85
2012	6	8	22	0	0	23.85
2012	6	8	23	0	0	22.85
2012	6	9	0	0	0	21.85
2012	6	9	1	0	0	21.85
2012	6	9	2	0	0	21.85
2012	6	9	3	0	0	20.85
2012	6	9	4	0	0	20.85
2012	6	9	5	0	0	19.85
2012	6	9	6	0	45	19.85
2012	6	9	7	0	235	21.85
2012	6	9	8	0	451	23.85
2012	6	9	9	0	655	24.85
2012	6	9	10	0	824	26.85
2012	6	9	11	0	945	28.85
2012	6	9	12	0	1008	29.85
2012	6	9	13	0	1008	29.85
2012	6	9	14	0	944	29.85
2012	6	9	15	0	823	29.85
2012	6	9	16	0	654	30.85
2012	6	9	17	0	450	30.85
2012	6	9	18	0	232	30.85
2012	6	9	19	0	46	29.85
2012	6	9	20	0	0	27.85
2012	6	9	21	0	0	26.85
2012	6	9	22	0	0	25.85
2012	6	9	23	0	0	24.85
2012	6	10	0	0	0	23.85
2012	6	10	1	0	0	23.85
2012	6	10	2	0	0	22.85
2012	6	10	3	0	0	22.85
2012	6	10	4	0	0	21.85
2012	6	10	5	0	0	21.85
2012	6	10	6	0	22	21.85
2012	6	10	7	0	177	23.85
2012	6	10	8	0	381	24.85
2012	6	10	9	0	653	26.85
2012	6	10	10	0	822	28.85
2012	6	10	11	0	943	30.85
2012	6	10	12	0	1006	31.85
2012	6	10	13	0	1007	32.85
2012	6	10	14	0	944	32.85
2012	6	10	15	0	823	32.85
2012	6	10	16	0	654	32.85
2012	6	10	17	0	451	32.85
2012	6	10	18	0	233	32.85
2012	6	10	19	0	48	31.85
2012	6	10	20	0	0	30.85
2012	6	10	21	0	0	28.85
2012	6	10	22	0	0	27.85
2012	6	10	23	0	0	26.85
2012	6	11	0	0	0	25.85
2012	6	11	1	0	0	24.85
2012	6	11	2	0	0	24.85
2012	6	11	3	0	0	24.85
2012	6	11	4	0	0	23.85
2012	6	11	5	0	0	23.85
2012	6	11	6	0	44	23.85
2012	6	11	7	0	214	25.85
2012	6	11	8	0	378	26.85
2012	6	11	9	0	653	28.85
2012	6	11	10	0	821	30.85
2012	6	11	11	0	943	31.85
2012	6	11	12	0	1006	32.85
2012	6	11	13	0	1007	33.85
2012	6	11	14	0	944	33.85
2012	6	11	15	0	824	34.85
2012	6	11	16	0	655	34.85
2012	6	11	17	0	452	35.85
2012	6	11	18	0	200	35.85
2012	6	11	19	0	43	33.85
2012	6	11	20	0	0	32.85
2012	6	11	21	0	0	30.85
2012	6	11	22	0	0	28.85
2012	6	11	23	0	0	26.85
2012	6	12	0	0	0	25.85
2012	6	12	1	0	0	24.85
2012	6	12	2	0	0	24.85
2012	6	12	3	0	0	24.85
2012	6	12	4	0	0	23.85
2012	6	12	5	0	0	23.85
2012	6	12	6	0	14	23.85
2012	6	12	7	0	58	25.85
2012	6	12	8	0	151	26.85
2012	6	12	9	0	241	28.85
2012	6	12	10	0	733	30.85
2012	6	12	11	0	878	31.85
2012	6	12	12	0	835	32.85
2012	6	12	13	0	972	32.85
2012	6	12	14	0	721	32.85
2012	6	12	15	0	482	33.85
2012	6	12	16	0	344	33.85
2012	6	12	17	0	75	33.85
2012	6	12	18	0	169	33.85
2012	6	12	19	0	35	31.85
2012	6	12	20	0	0	30.85
2012	6	12	21	0	0	28.85
2012	6	12	22	0	0	27.85
2012	6	12	23	0	0	25.85
2012	6	13	0	0	0	24.85
2012	6	13	1	0	0	23.85
2012	6	13	2	0	0	22.85
2012	6	13	3	0	0	22.85
2012	6	13	4	0	0	21.85
2012	6	13	5	0	0	20.85
2012	6	13	6	0	32	20.85
2012	6	13	7	0	123	21.85
2012	6	13	8	0	165	23.85
2012	6	13	9	0	326	25.85
2012	6	13	10	0	351	27.85
2012	6	13	11	0	677	29.85
2012	6	13	12	0	741	30.85
2012	6	13	13	0	1012	31.85
2012	6	13	14	0	950	31.85
2012	6	13	15	0	830	32.85
2012	6	13	16	0	661	32.85
2012	6	13	17	0	458	33.85
2012	6	13	18	0	239	33.85
2012	6	13	19	0	51	32.85
2012	6	13	20	0	0	30.85
2012	6	13	21	0	0	29.85
2012	6	13	22	0	0	27.85
2012	6	13	23	0	0	26.85
2012	6	14	0	0	0	24.85
2012	6	14	1	0	0	24.85
2012	6	14	2	0	0	24.85
2012	6	14	3	0	0	24.85
2012	6	14	4	0	0	23.85
2012	6	14	5	0	0	23.85
2012	6	14	6	0	20	23.85
2012	6	14	7	0	114	25.85
2012	6	14	8	0	355	26.85
2012	6	14	9	0	523	28.85
2012	6	14	10	0	701	29.85
2012	6	14	11	0	911	31.85
2012	6	14	12	0	975	32.85
2012	6	14	13	0	974	32.85
2012	6	14	14	0	683	32.85
2012	6	14	15	0	832	32.85
2012	6	14	16	0	663	32.85
2012	6	14	17	0	430	32.85
2012	6	14	18	0	222	32.85
2012	6	14	19	0	46	31.85
2012	6	14	20	0	0	30.85
2012	6	14	21	0	0	28.85
2012	6	14	22	0	0	27.85
2012	6	14	23	0	0	25.85
2012	6	15	0	0	0	24.85
2012	6	15	1	0	0	23.85
2012	6	15	2	0	0	23.85
2012	6	15	3	0	0	23.85
2012	6	15	4	0	0	23.85
2012	6	15	5	0	0	22.85
2012	6	15	6	0	32	23.85
2012	6	15	7	0	183	24.85
2012	6	15	8	0	353	26.85
2012	6	15	9	0	601	27.85
2012	6	15	10	0	788	29.85
2012	6	15	11	0	719	31.85
2012	6	15	12	0	796	32.85
2012	6	15	13	0	743	32.85
2012	6	15	14	0	822	32.85
2012	6	15	15	0	834	32.85
2012	6	15	16	0	665	32.85
2012	6	15	17	0	462	33.85
2012	6	15	18	0	242	32.85
2012	6	15	19	0	52	31.85
2012	6	15	20	0	0	30.85
2012	6	15	21	0	0	28.85
2012	6	15	22	0	0	26.85
2012	6	15	23	0	0	25.85
2012	6	16	0	0	0	23.85
2012	6	16	1	0	0	23.85
2012	6	16	2	0	0	23.85
2012	6	16	3	0	0	22.85
2012	6	16	4	0	0	21.85
2012	6	16	5	0	0	21.85
2012	6	16	6	0	33	21.85
2012	6	16	7	0	234	23.85
2012	6	16	8	0	273	24.85
2012	6	16	9	0	655	26.85
2012	6	16	10	0	826	28.85
2012	6	16	11	0	947	30.85
2012	6	16	12	0	1013	31.85
2012	6	16	13	0	1014	31.85
2012	6	16	14	0	952	32.85
2012	6	16	15	0	832	32.85
2012	6	16	16	0	664	32.85
2012	6	16	17	0	461	32.85
2012	6	16	18	0	228	32.85
2012	6	16	19	0	48	30.85
2012	6	16	20	0	0	29.85
2012	6	16	21	0	0	28.85
2012	6	16	22	0	0	26.85
2012	6	16	23	0	0	25.85
2012	6	17	0	0	0	23.85
2012	6	17	1	0	0	23.85
2012	6	17	2	0	0	23.85
2012	6	17	3	0	0	23.85
2012	6	17	4	0	0	23.85
2012	6	17	5	0	0	22.85
2012	6	17	6	0	44	22.85
2012	6	17	7	0	234	23.85
2012	6	17	8	0	320	23.85
2012	6	17	9	0	659	24.85
2012	6	17	10	0	831	24.85
2012	6	17	11	0	683	25.85
2012	6	17	12	0	694	26.85
2012	6	17	13	0	809	26.85
2012	6	17	14	0	962	26.85
2012	6	17	15	0	843	26.85
2012	6	17	16	0	674	27.85
2012	6	17	17	0	429	27.85
2012	6	17	18	0	201	27.85
2012	6	17	19	0	43	26.85
2012	6	17	20	0	0	26.85
2012	6	17	21	0	0	25.85
2012	6	17	22	0	0	25.85
2012	6	17	23	0	0	24.85
2012	6	18	0	0	0	24.85
2012	6	18	1	0	0	23.85
2012	6	18	2	0	0	23.85
2012	6	18	3	0	0	23.85
2012	6	18	4	0	0	22.85
2012	6	18	5	0	0	22.85
2012	6	18	6	0	28	22.85
2012	6	18	7	0	194	23.85
2012	6	18	8	0	383	24.85
2012	6	18	9	0	627	26.85
2012	6	18	10	0	707	27.85
2012	6	18	11	0	916	29.85
2012	6	18	12	0	980	30.85
2012	6	18	13	0	984	30.85
2012	6	18	14	0	951	30.85
2012	6	18	15	0	503	31.85
2012	6	18	16	0	611	31.85
2012	6	18	17	0	444	31.85
2012	6	18	18	0	235	31.85
2012	6	18	19	0	51	30.85
2012	6	18	20	0	0	28.85
2012	6	18	21	0	0	27.85
2012	6	18	22	0	0	25.85
2012	6	18	23	0	0	24.85
2012	6	19	0	0	0	23.85
2012	6	19	1	0	0	23.85
2012	6	19	2	0	0	22.85
2012	6	19	3	0	0	22.85
2012	6	19	4	0	0	22.85
2012	6	19	5	0	0	22.85
2012	6	19	6	0	17	22.85
2012	6	19	7	0	158	23.85
2012	6	19	8	0	342	24.85
2012	6	19	9	0	500	25.85
2012	6	19	10	0	581	27.85
2012	6	19	11	0	686	28.85
2012	6	19	12	0	461	29.85
2012	6	19	13	0	30	28.85
2012	6	19	14	0	249	27.85
2012	6	19	15	0	427	26.85
2012	6	19	16	0	407	26.85
2012	6	19	17	0	241	25.85
2012	6	19	18	0	88	24.85
2012	6	19	19	0	19	24.85
2012	6	19	20	0	0	24.85
2012	6	19	21	0	0	23.85
2012	6	19	22	0	0	23.85
2012	6	19	23	0	0	23.85
2012	6	20	0	0	0	23.85
2012	6	20	1	0	0	23.85
2012	6	20	2	0	0	22.85
2012	6	20	3	0	0	22.85
2012	6	20	4	0	0	22.85
2012	6	20	5	0	0	22.85
2012	6	20	6	0	24	22.85
2012	6	20	7	0	73	22.85
2012	6	20	8	0	280	23.85
2012	6	20	9	0	546	23.85
2012	6	20	10	0	819	24.85
2012	6	20	11	0	485	24.85
2012	6	20	12	0	171	25.85
2012	6	20	13	0	455	25.85
2012	6	20	14	0	903	25.85
2012	6	20	15	0	201	24.85
2012	6	20	16	0	110	24.85
2012	6	20	17	0	223	24.85
2012	6	20	18	0	215	24.85
2012	6	20	19	0	47	24.85
2012	6	20	20	0	0	23.85
2012	6	20	21	0	0	23.85
2012	6	20	22	0	0	23.85
2012	6	20	23	0	0	23.85
2012	6	21	0	0	0	22.85
2012	6	21	1	0	0	22.85
2012	6	21	2	0	0	22.85
2012	6	21	3	0	0	21.85
2012	6	21	4	0	0	21.85
2012	6	21	5	0	0	21.85
2012	6	21	6	0	42	21.85
2012	6	21	7	0	214	22.85
2012	6	21	8	0	372	23.85
2012	6	21	9	0	654	25.85
2012	6	21	10	0	827	26.85
2012	6	21	11	0	950	28.85
2012	6	21	12	0	973	29.85
2012	6	21	13	0	976	29.85
2012	6	21	14	0	960	29.85
2012	6	21	15	0	802	29.85
2012	6	21	16	0	638	30.85
2012	6	21	17	0	409	30.85
2012	6	21	18	0	236	30.85
2012	6	21	19	0	53	29.85
2012	6	21	20	0	0	28.85
2012	6	21	21	0	0	27.85
2012	6	21	22	0	0	26.85
2012	6	21	23	0	0	25.85
2012	6	22	0	0	0	25.85
2012	6	22	1	0	0	24.85
2012	6	22	2	0	0	24.85
2012	6	22	3	0	0	23.85
2012	6	22	4	0	0	23.85
2012	6	22	5	0	0	23.85
2012	6	22	6	0	42	23.85
2012	6	22	7	0	233	24.85
2012	6	22	8	0	452	25.85
2012	6	22	9	0	659	27.85
2012	6	22	10	0	831	28.85
2012	6	22	11	0	956	30.85
2012	6	22	12	0	902	31.85
2012	6	22	13	0	698	31.85
2012	6	22	14	0	831	31.85
2012	6	22	15	0	584	31.85
2012	6	22	16	0	678	31.85
2012	6	22	17	0	473	32.85
2012	6	22	18	0	253	32.85
2012	6	22	19	0	56	31.85
2012	6	22	20	0	0	30.85
2012	6	22	21	0	0	29.85
2012	6	22	22	0	0	28.85
2012	6	22	23	0	0	27.85
2012	6	23	0	0	0	27.85
2012	6	23	1	0	0	26.85
2012	6	23	2	0	0	26.85
2012	6	23	3	0	0	25.85
2012	6	23	4	0	0	25.85
2012	6	23	5	0	0	24.85
2012	6	23	6	0	42	24.85
2012	6	23	7	0	232	26.85
2012	6	23	8	0	451	27.85
2012	6	23	9	0	658	28.85
2012	6	23	10	0	830	29.85
2012	6	23	11	0	843	30.85
2012	6	23	12	0	780	31.85
2012	6	23	13	0	1024	32.85
2012	6	23	14	0	964	32.85
2012	6	23	15	0	844	32.85
2012	6	23	16	0	599	32.85
2012	6	23	17	0	472	32.85
2012	6	23	18	0	253	32.85
2012	6	23	19	0	55	31.85
2012	6	23	20	0	0	30.85
2012	6	23	21	0	0	29.85
2012	6	23	22	0	0	28.85
2012	6	23	23	0	0	26.85
2012	6	24	0	0	0	25.85
2012	6	24	1	0	0	25.85
2012	6	24	2	0	0	24.85
2012	6	24	3	0	0	24.85
2012	6	24	4	0	0	24.85
2012	6	24	5	0	0	23.85
2012	6	24	6	0	41	23.85
2012	6	24	7	0	232	25.85
2012	6	24	8	0	451	26.85
2012	6	24	9	0	658	28.85
2012	6	24	10	0	830	30.85
2012	6	24	11	0	955	31.85
2012	6	24	12	0	1022	32.85
2012	6	24	13	0	1026	32.85
2012	6	24	14	0	966	33.85
2012	6	24	15	0	694	33.85
2012	6	24	16	0	680	34.85
2012	6	24	17	0	475	34.85
2012	6	24	18	0	254	34.85
2012	6	24	19	0	58	33.85
2012	6	24	20	0	0	33.85
2012	6	24	21	0	0	32.85
2012	6	24	22	0	0	31.85
2012	6	24	23	0	0	30.85
2012	6	25	0	0	0	30.85
2012	6	25	1	0	0	29.85
2012	6	25	2	0	0	28.85
2012	6	25	3	0	0	27.85
2012	6	25	4	0	0	27.85
2012	6	25	5	0	0	26.85
2012	6	25	6	0	41	26.85
2012	6	25	7	0	232	27.85
2012	6	25	8	0	454	29.85
2012	6	25	9	0	661	30.85
2012	6	25	10	0	836	32.85
2012	6	25	11	0	962	33.85
2012	6	25	12	0	1030	34.85
2012	6	25	13	0	1034	35.85
2012	6	25	14	0	974	35.85
2012	6	25	15	0	856	36.85
2012	6	25	16	0	686	36.85
2012	6	25	17	0	481	36.85
2012	6	25	18	0	259	37.85
2012	6	25	19	0	57	36.85
2012	6	25	20	0	0	35.85
2012	6	25	21	0	0	34.85
2012	6	25	22	0	0	34.85
2012	6	25	23	0	0	33.85
2012	6	26	0	0	0	32.85
2012	6	26	1	0	0	32.85
2012	6	26	2	0	0	31.85
2012	6	26	3	0	0	31.85
2012	6	26	4	0	0	30.85
2012	6	26	5	0	0	29.85
2012	6	26	6	0	40	29.85
2012	6	26	7	0	231	31.85
2012	6	26	8	0	452	32.85
2012	6	26	9	0	658	33.85
2012	6	26	10	0	832	34.85
2012	6	26	11	0	958	36.85
2012	6	26	12	0	1024	37.85
2012	6	26	13	0	1028	37.85
2012	6	26	14	0	767	37.85
2012	6	26	15	0	723	37.85
2012	6	26	16	0	681	38.85
2012	6	26	17	0	410	38.85
2012	6	26	18	0	224	38.85
2012	6	26	19	0	50	36.85
2012	6	26	20	0	0	35.85
2012	6	26	21	0	0	33.85
2012	6	26	22	0	0	32.85
2012	6	26	23	0	0	31.85
2012	6	27	0	0	0	30.85
2012	6	27	1	0	0	30.85
2012	6	27	2	0	0	29.85
2012	6	27	3	0	0	29.85
2012	6	27	4	0	0	28.85
2012	6	27	5	0	0	28.85
2012	6	27	6	0	39	28.85
2012	6	27	7	0	230	29.85
2012	6	27	8	0	449	31.85
2012	6	27	9	0	655	32.85
2012	6	27	10	0	829	33.85
2012	6	27	11	0	954	34.85
2012	6	27	12	0	983	36.85
2012	6	27	13	0	978	36.85
2012	6	27	14	0	697	36.85
2012	6	27	15	0	848	36.85
2012	6	27	16	0	681	36.85
2012	6	27	17	0	476	37.85
2012	6	27	18	0	256	36.85
2012	6	27	19	0	59	35.85
2012	6	27	20	0	0	33.85
2012	6	27	21	0	0	32.85
2012	6	27	22	0	0	31.85
2012	6	27	23	0	0	29.85
2012	6	28	0	0	0	28.85
2012	6	28	1	0	0	27.85
2012	6	28	2	0	0	26.85
2012	6	28	3	0	0	25.85
2012	6	28	4	0	0	24.85
2012	6	28	5	0	0	23.85
2012	6	28	6	0	38	23.85
2012	6	28	7	0	227	25.85
2012	6	28	8	0	445	26.85
2012	6	28	9	0	651	28.85
2012	6	28	10	0	823	30.85
2012	6	28	11	0	948	31.85
2012	6	28	12	0	988	32.85
2012	6	28	13	0	759	32.85
2012	6	28	14	0	960	33.85
2012	6	28	15	0	842	33.85
2012	6	28	16	0	617	33.85
2012	6	28	17	0	473	33.85
2012	6	28	18	0	255	33.85
2012	6	28	19	0	57	32.85
2012	6	28	20	0	0	31.85
2012	6	28	21	0	0	30.85
2012	6	28	22	0	0	29.85
2012	6	28	23	0	0	27.85
2012	6	29	0	0	0	26.85
2012	6	29	1	0	0	25.85
2012	6	29	2	0	0	25.85
2012	6	29	3	0	0	24.85
2012	6	29	4	0	0	23.85
2012	6	29	5	0	0	23.85
2012	6	29	6	0	37	23.85
2012	6	29	7	0	154	24.85
2012	6	29	8	0	252	26.85
2012	6	29	9	0	643	27.85
2012	6	29	10	0	815	29.85
2012	6	29	11	0	792	31.85
2012	6	29	12	0	918	32.85
2012	6	29	13	0	477	32.85
2012	6	29	14	0	592	32.85
2012	6	29	15	0	398	32.85
2012	6	29	16	0	614	32.85
2012	6	29	17	0	441	32.85
2012	6	29	18	0	234	32.85
2012	6	29	19	0	53	30.85
2012	6	29	20	0	0	29.85
2012	6	29	21	0	0	28.85
2012	6	29	22	0	0	26.85
2012	6	29	23	0	0	25.85
2012	6	30	0	0	0	24.85
2012	6	30	1	0	0	24.85
2012	6	30	2	0	0	23.85
2012	6	30	3	0	0	23.85
2012	6	30	4	0	0	23.85
2012	6	30	5	0	0	22.85
2012	6	30	6	0	34	22.85
2012	6	30	7	0	206	23.85
2012	6	30	8	0	267	25.85
2012	6	30	9	0	403	26.85
2012	6	30	10	0	706	28.85
2012	6	30	11	0	647	29.85
2012	6	30	12	0	949	30.85
2012	6	30	13	0	424	30.85
2012	6	30	14	0	473	30.85
2012	6	30	15	0	123	30.85
2012	6	30	16	0	448	30.85
2012	6	30	17	0	442	30.85
2012	6	30	18	0	104	29.85
2012	6	30	19	0	23	28.85
2012	6	30	20	0	0	27.85
2012	6	30	21	0	0	25.85
2012	6	30	22	0	0	24.85
2012	6	30	23	0	0	23.85
2012	7	1	0	0	0	22.85
2012	7	1	1	0	0	22.85
2012	7	1	2	0	0	21.85
2012	7	1	3	0	0	21.85
2012	7	1	4	0	0	21.85
2012	7	1	5	0	0	20.85
2012	7	1	6	0	24	20.85
2012	7	1	7	0	125	22.85
2012	7	1	8	0	219	23.85
2012	7	1	9	0	71	24.85
2012	7	1	10	0	285	26.85
2012	7	1	11	0	427	27.85
2012	7	1	12	0	856	28.85
2012	7	1	13	0	540	28.85
2012	7	1	14	0	519	28.85
2012	7	1	15	0	493	28.85
2012	7	1	16	0	461	28.85
2012	7	1	17	0	437	28.85
2012	7	1	18	0	232	27.85
2012	7	1	19	0	53	27.85
2012	7	1	20	0	0	26.85
2012	7	1	21	0	0	25.85
2012	7	1	22	0	0	24.85
2012	7	1	23	0	0	24.85
2012	7	2	0	0	0	23.85
2012	7	2	1	0	0	23.85
2012	7	2	2	0	0	23.85
2012	7	2	3	0	0	23.85
2012	7	2	4	0	0	23.85
2012	7	2	5	0	0	23.85
2012	7	2	6	0	12	23.85
2012	7	2	7	0	174	24.85
2012	7	2	8	0	321	25.85
2012	7	2	9	0	572	26.85
2012	7	2	10	0	697	28.85
2012	7	2	11	0	870	29.85
2012	7	2	12	0	789	30.85
2012	7	2	13	0	530	30.85
2012	7	2	14	0	606	31.85
2012	7	2	15	0	775	31.85
2012	7	2	16	0	680	31.85
2012	7	2	17	0	446	32.85
2012	7	2	18	0	259	32.85
2012	7	2	19	0	59	30.85
2012	7	2	20	0	0	28.85
2012	7	2	21	0	0	27.85
2012	7	2	22	0	0	25.85
2012	7	2	23	0	0	24.85
2012	7	3	0	0	0	23.85
2012	7	3	1	0	0	23.85
2012	7	3	2	0	0	22.85
2012	7	3	3	0	0	22.85
2012	7	3	4	0	0	22.85
2012	7	3	5	0	0	21.85
2012	7	3	6	0	24	22.85
2012	7	3	7	0	112	23.85
2012	7	3	8	0	327	25.85
2012	7	3	9	0	427	26.85
2012	7	3	10	0	686	28.85
2012	7	3	11	0	911	30.85
2012	7	3	12	0	711	31.85
2012	7	3	13	0	1018	31.85
2012	7	3	14	0	961	31.85
2012	7	3	15	0	844	31.85
2012	7	3	16	0	678	31.85
2012	7	3	17	0	476	31.85
2012	7	3	18	0	258	31.85
2012	7	3	19	0	59	29.85
2012	7	3	20	0	0	28.85
2012	7	3	21	0	0	27.85
2012	7	3	22	0	0	26.85
2012	7	3	23	0	0	25.85
2012	7	4	0	0	0	24.85
2012	7	4	1	0	0	23.85
2012	7	4	2	0	0	23.85
2012	7	4	3	0	0	23.85
2012	7	4	4	0	0	22.85
2012	7	4	5	0	0	22.85
2012	7	4	6	0	26	22.85
2012	7	4	7	0	128	23.85
2012	7	4	8	0	261	25.85
2012	7	4	9	0	437	27.85
2012	7	4	10	0	817	28.85
2012	7	4	11	0	942	30.85
2012	7	4	12	0	1011	31.85
2012	7	4	13	0	1016	31.85
2012	7	4	14	0	807	32.85
2012	7	4	15	0	759	32.85
2012	7	4	16	0	537	32.85
2012	7	4	17	0	475	32.85
2012	7	4	18	0	258	32.85
2012	7	4	19	0	60	30.85
2012	7	4	20	0	0	29.85
2012	7	4	21	0	0	28.85
2012	7	4	22	0	0	27.85
2012	7	4	23	0	0	25.85
2012	7	5	0	0	0	24.85
2012	7	5	1	0	0	24.85
2012	7	5	2	0	0	23.85
2012	7	5	3	0	0	23.85
2012	7	5	4	0	0	22.85
2012	7	5	5	0	0	22.85
2012	7	5	6	0	33	22.85
2012	7	5	7	0	220	23.85
2012	7	5	8	0	439	25.85
2012	7	5	9	0	352	27.85
2012	7	5	10	0	820	28.85
2012	7	5	11	0	946	30.85
2012	7	5	12	0	1016	32.85
2012	7	5	13	0	1022	32.85
2012	7	5	14	0	691	32.85
2012	7	5	15	0	848	32.85
2012	7	5	16	0	683	32.85
2012	7	5	17	0	480	32.85
2012	7	5	18	0	235	32.85
2012	7	5	19	0	54	30.85
2012	7	5	20	0	0	29.85
2012	7	5	21	0	0	28.85
2012	7	5	22	0	0	27.85
2012	7	5	23	0	0	25.85
2012	7	6	0	0	0	24.85
2012	7	6	1	0	0	24.85
2012	7	6	2	0	0	23.85
2012	7	6	3	0	0	23.85
2012	7	6	4	0	0	22.85
2012	7	6	5	0	0	21.85
2012	7	6	6	0	33	21.85
2012	7	6	7	0	220	23.85
2012	7	6	8	0	439	25.85
2012	7	6	9	0	647	27.85
2012	7	6	10	0	822	29.85
2012	7	6	11	0	949	31.85
2012	7	6	12	0	1018	32.85
2012	7	6	13	0	1024	32.85
2012	7	6	14	0	967	32.85
2012	7	6	15	0	850	33.85
2012	7	6	16	0	684	33.85
2012	7	6	17	0	481	33.85
2012	7	6	18	0	259	33.85
2012	7	6	19	0	60	32.85
2012	7	6	20	0	0	31.85
2012	7	6	21	0	0	30.85
2012	7	6	22	0	0	28.85
2012	7	6	23	0	0	27.85
2012	7	7	0	0	0	26.85
2012	7	7	1	0	0	25.85
2012	7	7	2	0	0	25.85
2012	7	7	3	0	0	24.85
2012	7	7	4	0	0	23.85
2012	7	7	5	0	0	23.85
2012	7	7	6	0	31	23.85
2012	7	7	7	0	218	24.85
2012	7	7	8	0	437	26.85
2012	7	7	9	0	646	28.85
2012	7	7	10	0	821	30.85
2012	7	7	11	0	948	31.85
2012	7	7	12	0	1017	32.85
2012	7	7	13	0	754	33.85
2012	7	7	14	0	570	33.85
2012	7	7	15	0	689	33.85
2012	7	7	16	0	648	33.85
2012	7	7	17	0	253	34.85
2012	7	7	18	0	57	34.85
2012	7	7	19	0	13	32.85
2012	7	7	20	0	0	31.85
2012	7	7	21	0	0	30.85
2012	7	7	22	0	0	29.85
2012	7	7	23	0	0	27.85
2012	7	8	0	0	0	26.85
2012	7	8	1	0	0	26.85
2012	7	8	2	0	0	25.85
2012	7	8	3	0	0	25.85
2012	7	8	4	0	0	24.85
2012	7	8	5	0	0	24.85
2012	7	8	6	0	2	24.85
2012	7	8	7	0	55	25.85
2012	7	8	8	0	206	27.85
2012	7	8	9	0	598	28.85
2012	7	8	10	0	703	29.85
2012	7	8	11	0	819	31.85
2012	7	8	12	0	768	32.85
2012	7	8	13	0	384	32.85
2012	7	8	14	0	574	32.85
2012	7	8	15	0	722	32.85
2012	7	8	16	0	190	32.85
2012	7	8	17	0	13	31.85
2012	7	8	18	0	75	31.85
2012	7	8	19	0	17	30.85
2012	7	8	20	0	0	29.85
2012	7	8	21	0	0	27.85
2012	7	8	22	0	0	26.85
2012	7	8	23	0	0	25.85
2012	7	9	0	0	0	24.85
2012	7	9	1	0	0	24.85
2012	7	9	2	0	0	23.85
2012	7	9	3	0	0	23.85
2012	7	9	4	0	0	23.85
2012	7	9	5	0	0	23.85
2012	7	9	6	0	27	23.85
2012	7	9	7	0	195	24.85
2012	7	9	8	0	400	25.85
2012	7	9	9	0	519	27.85
2012	7	9	10	0	734	28.85
2012	7	9	11	0	721	30.85
2012	7	9	12	0	1003	31.85
2012	7	9	13	0	846	31.85
2012	7	9	14	0	762	30.85
2012	7	9	15	0	603	30.85
2012	7	9	16	0	276	30.85
2012	7	9	17	0	14	30.85
2012	7	9	18	0	123	30.85
2012	7	9	19	0	27	29.85
2012	7	9	20	0	0	28.85
2012	7	9	21	0	0	27.85
2012	7	9	22	0	0	26.85
2012	7	9	23	0	0	24.85
2012	7	10	0	0	0	24.85
2012	7	10	1	0	0	23.85
2012	7	10	2	0	0	23.85
2012	7	10	3	0	0	23.85
2012	7	10	4	0	0	22.85
2012	7	10	5	0	0	22.85
2012	7	10	6	0	26	21.85
2012	7	10	7	0	24	23.85
2012	7	10	8	0	233	24.85
2012	7	10	9	0	311	25.85
2012	7	10	10	0	501	27.85
2012	7	10	11	0	662	28.85
2012	7	10	12	0	451	29.85
2012	7	10	13	0	872	28.85
2012	7	10	14	0	951	28.85
2012	7	10	15	0	791	27.85
2012	7	10	16	0	171	26.85
2012	7	10	17	0	141	25.85
2012	7	10	18	0	85	25.85
2012	7	10	19	0	19	24.85
2012	7	10	20	0	0	24.85
2012	7	10	21	0	0	23.85
2012	7	10	22	0	0	23.85
2012	7	10	23	0	0	23.85
2012	7	11	0	0	0	23.85
2012	7	11	1	0	0	23.85
2012	7	11	2	0	0	22.85
2012	7	11	3	0	0	22.85
2012	7	11	4	0	0	22.85
2012	7	11	5	0	0	22.85
2012	7	11	6	0	21	22.85
2012	7	11	7	0	145	23.85
2012	7	11	8	0	238	23.85
2012	7	11	9	0	264	24.85
2012	7	11	10	0	692	25.85
2012	7	11	11	0	671	25.85
2012	7	11	12	0	155	26.85
2012	7	11	13	0	33	26.85
2012	7	11	14	0	24	25.85
2012	7	11	15	0	23	25.85
2012	7	11	16	0	479	25.85
2012	7	11	17	0	234	25.85
2012	7	11	18	0	142	24.85
2012	7	11	19	0	32	24.85
2012	7	11	20	0	0	24.85
2012	7	11	21	0	0	24.85
2012	7	11	22	0	0	23.85
2012	7	11	23	0	0	23.85
2012	7	12	0	0	0	23.85
2012	7	12	1	0	0	23.85
2012	7	12	2	0	0	22.85
2012	7	12	3	0	0	22.85
2012	7	12	4	0	0	22.85
2012	7	12	5	0	0	21.85
2012	7	12	6	0	24	22.85
2012	7	12	7	0	207	23.85
2012	7	12	8	0	424	23.85
2012	7	12	9	0	630	25.85
2012	7	12	10	0	804	26.85
2012	7	12	11	0	892	27.85
2012	7	12	12	0	434	28.85
2012	7	12	13	0	593	28.85
2012	7	12	14	0	594	28.85
2012	7	12	15	0	561	28.85
2012	7	12	16	0	531	28.85
2012	7	12	17	0	399	29.85
2012	7	12	18	0	252	28.85
2012	7	12	19	0	56	28.85
2012	7	12	20	0	0	27.85
2012	7	12	21	0	0	26.85
2012	7	12	22	0	0	25.85
2012	7	12	23	0	0	25.85
2012	7	13	0	0	0	24.85
2012	7	13	1	0	0	23.85
2012	7	13	2	0	0	23.85
2012	7	13	3	0	0	23.85
2012	7	13	4	0	0	23.85
2012	7	13	5	0	0	22.85
2012	7	13	6	0	25	22.85
2012	7	13	7	0	206	23.85
2012	7	13	8	0	365	24.85
2012	7	13	9	0	628	26.85
2012	7	13	10	0	723	27.85
2012	7	13	11	0	831	28.85
2012	7	13	12	0	423	29.85
2012	7	13	13	0	222	29.85
2012	7	13	14	0	23	30.85
2012	7	13	15	0	24	30.85
2012	7	13	16	0	20	30.85
2012	7	13	17	0	344	31.85
2012	7	13	18	0	162	31.85
2012	7	13	19	0	36	29.85
2012	7	13	20	0	0	28.85
2012	7	13	21	0	0	26.85
2012	7	13	22	0	0	25.85
2012	7	13	23	0	0	23.85
2012	7	14	0	0	0	23.85
2012	7	14	1	0	0	22.85
2012	7	14	2	0	0	22.85
2012	7	14	3	0	0	22.85
2012	7	14	4	0	0	22.85
2012	7	14	5	0	0	22.85
2012	7	14	6	0	24	22.85
2012	7	14	7	0	205	23.85
2012	7	14	8	0	422	23.85
2012	7	14	9	0	462	24.85
2012	7	14	10	0	803	25.85
2012	7	14	11	0	930	26.85
2012	7	14	12	0	1000	27.85
2012	7	14	13	0	950	27.85
2012	7	14	14	0	903	28.85
2012	7	14	15	0	790	28.85
2012	7	14	16	0	414	29.85
2012	7	14	17	0	431	29.85
2012	7	14	18	0	252	29.85
2012	7	14	19	0	55	28.85
2012	7	14	20	0	0	27.85
2012	7	14	21	0	0	26.85
2012	7	14	22	0	0	25.85
2012	7	14	23	0	0	24.85
2012	7	15	0	0	0	23.85
2012	7	15	1	0	0	23.85
2012	7	15	2	0	0	23.85
2012	7	15	3	0	0	23.85
2012	7	15	4	0	0	22.85
2012	7	15	5	0	0	22.85
2012	7	15	6	0	23	22.85
2012	7	15	7	0	204	23.85
2012	7	15	8	0	422	24.85
2012	7	15	9	0	630	25.85
2012	7	15	10	0	805	26.85
2012	7	15	11	0	776	27.85
2012	7	15	12	0	631	28.85
2012	7	15	13	0	902	28.85
2012	7	15	14	0	744	28.85
2012	7	15	15	0	583	29.85
2012	7	15	16	0	319	29.85
2012	7	15	17	0	437	29.85
2012	7	15	18	0	125	29.85
2012	7	15	19	0	27	28.85
2012	7	15	20	0	0	27.85
2012	7	15	21	0	0	26.85
2012	7	15	22	0	0	25.85
2012	7	15	23	0	0	24.85
2012	7	16	0	0	0	23.85
2012	7	16	1	0	0	23.85
2012	7	16	2	0	0	23.85
2012	7	16	3	0	0	22.85
2012	7	16	4	0	0	22.85
2012	7	16	5	0	0	21.85
2012	7	16	6	0	22	21.85
2012	7	16	7	0	203	23.85
2012	7	16	8	0	200	24.85
2012	7	16	9	0	629	26.85
2012	7	16	10	0	804	27.85
2012	7	16	11	0	932	29.85
2012	7	16	12	0	1002	30.85
2012	7	16	13	0	1009	30.85
2012	7	16	14	0	953	30.85
2012	7	16	15	0	838	30.85
2012	7	16	16	0	671	30.85
2012	7	16	17	0	388	30.85
2012	7	16	18	0	251	30.85
2012	7	16	19	0	54	29.85
2012	7	16	20	0	0	27.85
2012	7	16	21	0	0	26.85
2012	7	16	22	0	0	25.85
2012	7	16	23	0	0	24.85
2012	7	17	0	0	0	23.85
2012	7	17	1	0	0	23.85
2012	7	17	2	0	0	23.85
2012	7	17	3	0	0	22.85
2012	7	17	4	0	0	22.85
2012	7	17	5	0	0	22.85
2012	7	17	6	0	19	22.85
2012	7	17	7	0	57	23.85
2012	7	17	8	0	13	24.85
2012	7	17	9	0	18	26.85
2012	7	17	10	0	192	27.85
2012	7	17	11	0	607	29.85
2012	7	17	12	0	672	30.85
2012	7	17	13	0	512	30.85
2012	7	17	14	0	548	30.85
2012	7	17	15	0	752	30.85
2012	7	17	16	0	409	30.85
2012	7	17	17	0	414	30.85
2012	7	17	18	0	58	29.85
2012	7	17	19	0	12	28.85
2012	7	17	20	0	0	27.85
2012	7	17	21	0	0	26.85
2012	7	17	22	0	0	25.85
2012	7	17	23	0	0	24.85
2012	7	18	0	0	0	23.85
2012	7	18	1	0	0	23.85
2012	7	18	2	0	0	23.85
2012	7	18	3	0	0	23.85
2012	7	18	4	0	0	23.85
2012	7	18	5	0	0	22.85
2012	7	18	6	0	10	23.85
2012	7	18	7	0	101	24.85
2012	7	18	8	0	346	25.85
2012	7	18	9	0	366	27.85
2012	7	18	10	0	536	28.85
2012	7	18	11	0	533	30.85
2012	7	18	12	0	960	31.85
2012	7	18	13	0	618	31.85
2012	7	18	14	0	734	30.85
2012	7	18	15	0	345	30.85
2012	7	18	16	0	369	29.85
2012	7	18	17	0	270	29.85
2012	7	18	18	0	173	28.85
2012	7	18	19	0	37	28.85
2012	7	18	20	0	0	27.85
2012	7	18	21	0	0	26.85
2012	7	18	22	0	0	25.85
2012	7	18	23	0	0	24.85
2012	7	19	0	0	0	24.85
2012	7	19	1	0	0	23.85
2012	7	19	2	0	0	23.85
2012	7	19	3	0	0	23.85
2012	7	19	4	0	0	23.85
2012	7	19	5	0	0	23.85
2012	7	19	6	0	19	23.85
2012	7	19	7	0	199	24.85
2012	7	19	8	0	418	26.85
2012	7	19	9	0	627	27.85
2012	7	19	10	0	805	29.85
2012	7	19	11	0	935	30.85
2012	7	19	12	0	1006	32.85
2012	7	19	13	0	1013	32.85
2012	7	19	14	0	958	32.85
2012	7	19	15	0	796	32.85
2012	7	19	16	0	606	32.85
2012	7	19	17	0	471	32.85
2012	7	19	18	0	225	32.85
2012	7	19	19	0	46	31.85
2012	7	19	20	0	0	29.85
2012	7	19	21	0	0	28.85
2012	7	19	22	0	0	27.85
2012	7	19	23	0	0	26.85
2012	7	20	0	0	0	25.85
2012	7	20	1	0	0	24.85
2012	7	20	2	0	0	24.85
2012	7	20	3	0	0	24.85
2012	7	20	4	0	0	23.85
2012	7	20	5	0	0	23.85
2012	7	20	6	0	18	23.85
2012	7	20	7	0	198	25.85
2012	7	20	8	0	419	26.85
2012	7	20	9	0	629	28.85
2012	7	20	10	0	807	30.85
2012	7	20	11	0	937	32.85
2012	7	20	12	0	1009	32.85
2012	7	20	13	0	1016	33.85
2012	7	20	14	0	960	33.85
2012	7	20	15	0	843	33.85
2012	7	20	16	0	676	34.85
2012	7	20	17	0	471	34.85
2012	7	20	18	0	250	34.85
2012	7	20	19	0	50	32.85
2012	7	20	20	0	0	32.85
2012	7	20	21	0	0	30.85
2012	7	20	22	0	0	29.85
2012	7	20	23	0	0	27.85
2012	7	21	0	0	0	26.85
2012	7	21	1	0	0	26.85
2012	7	21	2	0	0	25.85
2012	7	21	3	0	0	25.85
2012	7	21	4	0	0	25.85
2012	7	21	5	0	0	24.85
2012	7	21	6	0	17	24.85
2012	7	21	7	0	197	26.85
2012	7	21	8	0	418	28.85
2012	7	21	9	0	629	29.85
2012	7	21	10	0	808	31.85
2012	7	21	11	0	937	32.85
2012	7	21	12	0	1010	34.85
2012	7	21	13	0	910	34.85
2012	7	21	14	0	961	34.85
2012	7	21	15	0	843	35.85
2012	7	21	16	0	676	35.85
2012	7	21	17	0	472	35.85
2012	7	21	18	0	249	35.85
2012	7	21	19	0	51	33.85
2012	7	21	20	0	0	32.85
2012	7	21	21	0	0	30.85
2012	7	21	22	0	0	29.85
2012	7	21	23	0	0	27.85
2012	7	22	0	0	0	26.85
2012	7	22	1	0	0	25.85
2012	7	22	2	0	0	25.85
2012	7	22	3	0	0	25.85
2012	7	22	4	0	0	25.85
2012	7	22	5	0	0	24.85
2012	7	22	6	0	16	24.85
2012	7	22	7	0	162	25.85
2012	7	22	8	0	315	25.85
2012	7	22	9	0	551	25.85
2012	7	22	10	0	415	26.85
2012	7	22	11	0	494	26.85
2012	7	22	12	0	653	27.85
2012	7	22	13	0	970	28.85
2012	7	22	14	0	957	29.85
2012	7	22	15	0	784	29.85
2012	7	22	16	0	672	30.85
2012	7	22	17	0	334	31.85
2012	7	22	18	0	245	31.85
2012	7	22	19	0	50	30.85
2012	7	22	20	0	0	29.85
2012	7	22	21	0	0	28.85
2012	7	22	22	0	0	27.85
2012	7	22	23	0	0	26.85
2012	7	23	0	0	0	25.85
2012	7	23	1	0	0	24.85
2012	7	23	2	0	0	24.85
2012	7	23	3	0	0	23.85
2012	7	23	4	0	0	23.85
2012	7	23	5	0	0	23.85
2012	7	23	6	0	15	23.85
2012	7	23	7	0	97	24.85
2012	7	23	8	0	412	26.85
2012	7	23	9	0	621	27.85
2012	7	23	10	0	799	29.85
2012	7	23	11	0	929	30.85
2012	7	23	12	0	1001	31.85
2012	7	23	13	0	1008	31.85
2012	7	23	14	0	952	31.85
2012	7	23	15	0	835	31.85
2012	7	23	16	0	427	31.85
2012	7	23	17	0	463	31.85
2012	7	23	18	0	242	30.85
2012	7	23	19	0	48	29.85
2012	7	23	20	0	0	28.85
2012	7	23	21	0	0	27.85
2012	7	23	22	0	0	26.85
2012	7	23	23	0	0	25.85
2012	7	24	0	0	0	24.85
2012	7	24	1	0	0	23.85
2012	7	24	2	0	0	23.85
2012	7	24	3	0	0	23.85
2012	7	24	4	0	0	23.85
2012	7	24	5	0	0	22.85
2012	7	24	6	0	7	22.85
2012	7	24	7	0	96	24.85
2012	7	24	8	0	218	25.85
2012	7	24	9	0	619	27.85
2012	7	24	10	0	797	29.85
2012	7	24	11	0	927	30.85
2012	7	24	12	0	999	32.85
2012	7	24	13	0	737	32.85
2012	7	24	14	0	950	32.85
2012	7	24	15	0	682	32.85
2012	7	24	16	0	666	32.85
2012	7	24	17	0	462	32.85
2012	7	24	18	0	240	32.85
2012	7	24	19	0	47	31.85
2012	7	24	20	0	0	29.85
2012	7	24	21	0	0	28.85
2012	7	24	22	0	0	27.85
2012	7	24	23	0	0	26.85
2012	7	25	0	0	0	25.85
2012	7	25	1	0	0	24.85
2012	7	25	2	0	0	24.85
2012	7	25	3	0	0	24.85
2012	7	25	4	0	0	23.85
2012	7	25	5	0	0	23.85
2012	7	25	6	0	13	23.85
2012	7	25	7	0	187	25.85
2012	7	25	8	0	407	26.85
2012	7	25	9	0	421	28.85
2012	7	25	10	0	794	29.85
2012	7	25	11	0	569	31.85
2012	7	25	12	0	791	32.85
2012	7	25	13	0	739	32.85
2012	7	25	14	0	946	32.85
2012	7	25	15	0	830	32.85
2012	7	25	16	0	484	32.85
2012	7	25	17	0	459	32.85
2012	7	25	18	0	238	32.85
2012	7	25	19	0	45	31.85
2012	7	25	20	0	0	30.85
2012	7	25	21	0	0	29.85
2012	7	25	22	0	0	27.85
2012	7	25	23	0	0	26.85
2012	7	26	0	0	0	25.85
2012	7	26	1	0	0	25.85
2012	7	26	2	0	0	24.85
2012	7	26	3	0	0	24.85
2012	7	26	4	0	0	24.85
2012	7	26	5	0	0	23.85
2012	7	26	6	0	12	24.85
2012	7	26	7	0	186	25.85
2012	7	26	8	0	258	27.85
2012	7	26	9	0	247	28.85
2012	7	26	10	0	566	30.85
2012	7	26	11	0	696	31.85
2012	7	26	12	0	838	32.85
2012	7	26	13	0	735	32.85
2012	7	26	14	0	705	32.85
2012	7	26	15	0	612	32.85
2012	7	26	16	0	666	32.85
2012	7	26	17	0	462	33.85
2012	7	26	18	0	164	32.85
2012	7	26	19	0	30	31.85
2012	7	26	20	0	0	30.85
2012	7	26	21	0	0	28.85
2012	7	26	22	0	0	27.85
2012	7	26	23	0	0	25.85
2012	7	27	0	0	0	24.85
2012	7	27	1	0	0	24.85
2012	7	27	2	0	0	23.85
2012	7	27	3	0	0	23.85
2012	7	27	4	0	0	23.85
2012	7	27	5	0	0	23.85
2012	7	27	6	0	11	23.85
2012	7	27	7	0	186	24.85
2012	7	27	8	0	268	26.85
2012	7	27	9	0	622	27.85
2012	7	27	10	0	589	29.85
2012	7	27	11	0	819	31.85
2012	7	27	12	0	730	32.85
2012	7	27	13	0	673	32.85
2012	7	27	14	0	959	32.85
2012	7	27	15	0	842	33.85
2012	7	27	16	0	672	33.85
2012	7	27	17	0	464	33.85
2012	7	27	18	0	239	33.85
2012	7	27	19	0	46	32.85
2012	7	27	20	0	0	31.85
2012	7	27	21	0	0	29.85
2012	7	27	22	0	0	28.85
2012	7	27	23	0	0	26.85
2012	7	28	0	0	0	25.85
2012	7	28	1	0	0	24.85
2012	7	28	2	0	0	24.85
2012	7	28	3	0	0	23.85
2012	7	28	4	0	0	23.85
2012	7	28	5	0	0	22.85
2012	7	28	6	0	10	22.85
2012	7	28	7	0	186	24.85
2012	7	28	8	0	410	26.85
2012	7	28	9	0	623	28.85
2012	7	28	10	0	805	30.85
2012	7	28	11	0	937	32.85
2012	7	28	12	0	1010	33.85
2012	7	28	13	0	1018	33.85
2012	7	28	14	0	961	34.85
2012	7	28	15	0	842	34.85
2012	7	28	16	0	672	35.85
2012	7	28	17	0	463	35.85
2012	7	28	18	0	237	35.85
2012	7	28	19	0	45	33.85
2012	7	28	20	0	0	32.85
2012	7	28	21	0	0	31.85
2012	7	28	22	0	0	29.85
2012	7	28	23	0	0	27.85
2012	7	29	0	0	0	26.85
2012	7	29	1	0	0	25.85
2012	7	29	2	0	0	25.85
2012	7	29	3	0	0	24.85
2012	7	29	4	0	0	24.85
2012	7	29	5	0	0	23.85
2012	7	29	6	0	9	23.85
2012	7	29	7	0	183	25.85
2012	7	29	8	0	407	27.85
2012	7	29	9	0	620	29.85
2012	7	29	10	0	801	31.85
2012	7	29	11	0	933	32.85
2012	7	29	12	0	1006	34.85
2012	7	29	13	0	1013	34.85
2012	7	29	14	0	956	34.85
2012	7	29	15	0	837	34.85
2012	7	29	16	0	667	34.85
2012	7	29	17	0	459	35.85
2012	7	29	18	0	157	34.85
2012	7	29	19	0	30	33.85
2012	7	29	20	0	0	32.85
2012	7	29	21	0	0	30.85
2012	7	29	22	0	0	29.85
2012	7	29	23	0	0	28.85
2012	7	30	0	0	0	26.85
2012	7	30	1	0	0	26.85
2012	7	30	2	0	0	25.85
2012	7	30	3	0	0	25.85
2012	7	30	4	0	0	24.85
2012	7	30	5	0	0	24.85
2012	7	30	6	0	8	24.85
2012	7	30	7	0	181	25.85
2012	7	30	8	0	404	27.85
2012	7	30	9	0	618	29.85
2012	7	30	10	0	799	30.85
2012	7	30	11	0	931	32.85
2012	7	30	12	0	1004	33.85
2012	7	30	13	0	1012	33.85
2012	7	30	14	0	954	33.85
2012	7	30	15	0	835	34.85
2012	7	30	16	0	665	34.85
2012	7	30	17	0	457	34.85
2012	7	30	18	0	232	34.85
2012	7	30	19	0	43	32.85
2012	7	30	20	0	0	31.85
2012	7	30	21	0	0	30.85
2012	7	30	22	0	0	28.85
2012	7	30	23	0	0	27.85
2012	7	31	0	0	0	26.85
2012	7	31	1	0	0	25.85
2012	7	31	2	0	0	25.85
2012	7	31	3	0	0	24.85
2012	7	31	4	0	0	24.85
2012	7	31	5	0	0	23.85
2012	7	31	6	0	8	23.85
2012	7	31	7	0	180	25.85
2012	7	31	8	0	404	27.85
2012	7	31	9	0	618	29.85
2012	7	31	10	0	799	31.85
2012	7	31	11	0	932	32.85
2012	7	31	12	0	1005	34.85
2012	7	31	13	0	1013	34.85
2012	7	31	14	0	955	34.85
2012	7	31	15	0	836	35.85
2012	7	31	16	0	665	35.85
2012	7	31	17	0	456	35.85
2012	7	31	18	0	230	35.85
2012	7	31	19	0	42	33.85
2012	7	31	20	0	0	32.85
2012	7	31	21	0	0	31.85
2012	7	31	22	0	0	29.85
2012	7	31	23	0	0	27.85
2012	8	1	0	0	0	26.85
2012	8	1	1	0	0	25.85
2012	8	1	2	0	0	25.85
2012	8	1	3	0	0	24.85
2012	8	1	4	0	0	23.85
2012	8	1	5	0	0	23.85
2012	8	1	6	0	7	23.85
2012	8	1	7	0	178	25.85
2012	8	1	8	0	402	27.85
2012	8	1	9	0	617	29.85
2012	8	1	10	0	798	31.85
2012	8	1	11	0	931	33.85
2012	8	1	12	0	1005	35.85
2012	8	1	13	0	1012	35.85
2012	8	1	14	0	954	35.85
2012	8	1	15	0	834	35.85
2012	8	1	16	0	663	35.85
2012	8	1	17	0	453	35.85
2012	8	1	18	0	228	35.85
2012	8	1	19	0	41	33.85
2012	8	1	20	0	0	32.85
2012	8	1	21	0	0	30.85
2012	8	1	22	0	0	29.85
2012	8	1	23	0	0	27.85
2012	8	2	0	0	0	25.85
2012	8	2	1	0	0	25.85
2012	8	2	2	0	0	24.85
2012	8	2	3	0	0	24.85
2012	8	2	4	0	0	23.85
2012	8	2	5	0	0	23.85
2012	8	2	6	0	6	23.85
2012	8	2	7	0	175	25.85
2012	8	2	8	0	399	27.85
2012	8	2	9	0	613	29.85
2012	8	2	10	0	794	31.85
2012	8	2	11	0	926	33.85
2012	8	2	12	0	999	34.85
2012	8	2	13	0	1006	34.85
2012	8	2	14	0	948	34.85
2012	8	2	15	0	828	35.85
2012	8	2	16	0	657	35.85
2012	8	2	17	0	449	35.85
2012	8	2	18	0	223	34.85
2012	8	2	19	0	0	33.85
2012	8	2	20	0	0	31.85
2012	8	2	21	0	0	30.85
2012	8	2	22	0	0	28.85
2012	8	2	23	0	0	26.85
2012	8	3	0	0	0	25.85
2012	8	3	1	0	0	24.85
2012	8	3	2	0	0	24.85
2012	8	3	3	0	0	24.85
2012	8	3	4	0	0	23.85
2012	8	3	5	0	0	23.85
2012	8	3	6	0	0	23.85
2012	8	3	7	0	154	25.85
2012	8	3	8	0	338	27.85
2012	8	3	9	0	609	28.85
2012	8	3	10	0	790	30.85
2012	8	3	11	0	922	32.85
2012	8	3	12	0	995	33.85
2012	8	3	13	0	1002	33.85
2012	8	3	14	0	944	34.85
2012	8	3	15	0	825	34.85
2012	8	3	16	0	654	34.85
2012	8	3	17	0	445	34.85
2012	8	3	18	0	220	34.85
2012	8	3	19	0	0	32.85
2012	8	3	20	0	0	31.85
2012	8	3	21	0	0	29.85
2012	8	3	22	0	0	28.85
2012	8	3	23	0	0	26.85
2012	8	4	0	0	0	25.85
2012	8	4	1	0	0	24.85
2012	8	4	2	0	0	24.85
2012	8	4	3	0	0	24.85
2012	8	4	4	0	0	23.85
2012	8	4	5	0	0	23.85
2012	8	4	6	0	0	23.85
2012	8	4	7	0	171	25.85
2012	8	4	8	0	393	26.85
2012	8	4	9	0	607	28.85
2012	8	4	10	0	788	29.85
2012	8	4	11	0	921	31.85
2012	8	4	12	0	994	32.85
2012	8	4	13	0	1001	32.85
2012	8	4	14	0	943	33.85
2012	8	4	15	0	823	33.85
2012	8	4	16	0	652	33.85
2012	8	4	17	0	443	33.85
2012	8	4	18	0	218	33.85
2012	8	4	19	0	0	32.85
2012	8	4	20	0	0	31.85
2012	8	4	21	0	0	30.85
2012	8	4	22	0	0	28.85
2012	8	4	23	0	0	27.85
2012	8	5	0	0	0	26.85
2012	8	5	1	0	0	25.85
2012	8	5	2	0	0	25.85
2012	8	5	3	0	0	25.85
2012	8	5	4	0	0	24.85
2012	8	5	5	0	0	24.85
2012	8	5	6	0	0	24.85
2012	8	5	7	0	170	25.85
2012	8	5	8	0	394	27.85
2012	8	5	9	0	394	28.85
2012	8	5	10	0	791	30.85
2012	8	5	11	0	924	31.85
2012	8	5	12	0	961	32.85
2012	8	5	13	0	967	32.85
2012	8	5	14	0	872	33.85
2012	8	5	15	0	415	33.85
2012	8	5	16	0	402	33.85
2012	8	5	17	0	406	33.85
2012	8	5	18	0	218	33.85
2012	8	5	19	0	0	32.85
2012	8	5	20	0	0	30.85
2012	8	5	21	0	0	29.85
2012	8	5	22	0	0	28.85
2012	8	5	23	0	0	26.85
2012	8	6	0	0	0	25.85
2012	8	6	1	0	0	24.85
2012	8	6	2	0	0	24.85
2012	8	6	3	0	0	23.85
2012	8	6	4	0	0	23.85
2012	8	6	5	0	0	23.85
2012	8	6	6	0	0	23.85
2012	8	6	7	0	169	24.85
2012	8	6	8	0	171	26.85
2012	8	6	9	0	434	28.85
2012	8	6	10	0	245	30.85
2012	8	6	11	0	259	32.85
2012	8	6	12	0	829	33.85
2012	8	6	13	0	669	33.85
2012	8	6	14	0	945	34.85
2012	8	6	15	0	824	34.85
2012	8	6	16	0	652	34.85
2012	8	6	17	0	442	35.85
2012	8	6	18	0	214	35.85
2012	8	6	19	0	0	33.85
2012	8	6	20	0	0	32.85
2012	8	6	21	0	0	31.85
2012	8	6	22	0	0	30.85
2012	8	6	23	0	0	29.85
2012	8	7	0	0	0	28.85
2012	8	7	1	0	0	27.85
2012	8	7	2	0	0	26.85
2012	8	7	3	0	0	26.85
2012	8	7	4	0	0	25.85
2012	8	7	5	0	0	24.85
2012	8	7	6	0	0	24.85
2012	8	7	7	0	167	26.85
2012	8	7	8	0	391	28.85
2012	8	7	9	0	607	30.85
2012	8	7	10	0	790	32.85
2012	8	7	11	0	923	33.85
2012	8	7	12	0	996	34.85
2012	8	7	13	0	1003	34.85
2012	8	7	14	0	943	35.85
2012	8	7	15	0	823	35.85
2012	8	7	16	0	649	35.85
2012	8	7	17	0	439	35.85
2012	8	7	18	0	211	35.85
2012	8	7	19	0	0	34.85
2012	8	7	20	0	0	32.85
2012	8	7	21	0	0	32.85
2012	8	7	22	0	0	30.85
2012	8	7	23	0	0	29.85
2012	8	8	0	0	0	28.85
2012	8	8	1	0	0	27.85
2012	8	8	2	0	0	27.85
2012	8	8	3	0	0	26.85
2012	8	8	4	0	0	25.85
2012	8	8	5	0	0	24.85
2012	8	8	6	0	0	24.85
2012	8	8	7	0	165	26.85
2012	8	8	8	0	389	28.85
2012	8	8	9	0	604	30.85
2012	8	8	10	0	787	31.85
2012	8	8	11	0	919	32.85
2012	8	8	12	0	992	34.85
2012	8	8	13	0	999	34.85
2012	8	8	14	0	940	34.85
2012	8	8	15	0	819	34.85
2012	8	8	16	0	645	34.85
2012	8	8	17	0	434	34.85
2012	8	8	18	0	208	34.85
2012	8	8	19	0	0	33.85
2012	8	8	20	0	0	32.85
2012	8	8	21	0	0	31.85
2012	8	8	22	0	0	30.85
2012	8	8	23	0	0	29.85
2012	8	9	0	0	0	28.85
2012	8	9	1	0	0	27.85
2012	8	9	2	0	0	26.85
2012	8	9	3	0	0	26.85
2012	8	9	4	0	0	25.85
2012	8	9	5	0	0	25.85
2012	8	9	6	0	0	25.85
2012	8	9	7	0	135	26.85
2012	8	9	8	0	387	27.85
2012	8	9	9	0	602	29.85
2012	8	9	10	0	745	30.85
2012	8	9	11	0	696	31.85
2012	8	9	12	0	878	32.85
2012	8	9	13	0	997	33.85
2012	8	9	14	0	937	33.85
2012	8	9	15	0	816	34.85
2012	8	9	16	0	642	34.85
2012	8	9	17	0	431	35.85
2012	8	9	18	0	205	35.85
2012	8	9	19	0	0	34.85
2012	8	9	20	0	0	32.85
2012	8	9	21	0	0	32.85
2012	8	9	22	0	0	31.85
2012	8	9	23	0	0	30.85
2012	8	10	0	0	0	29.85
2012	8	10	1	0	0	28.85
2012	8	10	2	0	0	28.85
2012	8	10	3	0	0	27.85
2012	8	10	4	0	0	26.85
2012	8	10	5	0	0	26.85
2012	8	10	6	0	0	26.85
2012	8	10	7	0	162	28.85
2012	8	10	8	0	388	30.85
2012	8	10	9	0	606	32.85
2012	8	10	10	0	790	33.85
2012	8	10	11	0	924	36.85
2012	8	10	12	0	998	37.85
2012	8	10	13	0	1006	37.85
2012	8	10	14	0	913	37.85
2012	8	10	15	0	25	38.85
2012	8	10	16	0	623	38.85
2012	8	10	17	0	382	38.85
2012	8	10	18	0	196	38.85
2012	8	10	19	0	0	36.85
2012	8	10	20	0	0	35.85
2012	8	10	21	0	0	33.85
2012	8	10	22	0	0	32.85
2012	8	10	23	0	0	31.85
2012	8	11	0	0	0	29.85
2012	8	11	1	0	0	29.85
2012	8	11	2	0	0	28.85
2012	8	11	3	0	0	27.85
2012	8	11	4	0	0	26.85
2012	8	11	5	0	0	26.85
2012	8	11	6	0	0	25.85
2012	8	11	7	0	161	27.85
2012	8	11	8	0	388	29.85
2012	8	11	9	0	605	30.85
2012	8	11	10	0	790	32.85
2012	8	11	11	0	924	33.85
2012	8	11	12	0	996	34.85
2012	8	11	13	0	1003	35.85
2012	8	11	14	0	942	35.85
2012	8	11	15	0	819	36.85
2012	8	11	16	0	643	36.85
2012	8	11	17	0	430	36.85
2012	8	11	18	0	201	36.85
2012	8	11	19	0	0	35.85
2012	8	11	20	0	0	33.85
2012	8	11	21	0	0	32.85
2012	8	11	22	0	0	31.85
2012	8	11	23	0	0	29.85
2012	8	12	0	0	0	28.85
2012	8	12	1	0	0	27.85
2012	8	12	2	0	0	27.85
2012	8	12	3	0	0	26.85
2012	8	12	4	0	0	25.85
2012	8	12	5	0	0	25.85
2012	8	12	6	0	0	25.85
2012	8	12	7	0	159	26.85
2012	8	12	8	0	385	28.85
2012	8	12	9	0	602	30.85
2012	8	12	10	0	787	31.85
2012	8	12	11	0	921	32.85
2012	8	12	12	0	993	34.85
2012	8	12	13	0	1000	34.85
2012	8	12	14	0	939	34.85
2012	8	12	15	0	816	35.85
2012	8	12	16	0	640	35.85
2012	8	12	17	0	427	35.85
2012	8	12	18	0	198	35.85
2012	8	12	19	0	0	34.85
2012	8	12	20	0	0	32.85
2012	8	12	21	0	0	31.85
2012	8	12	22	0	0	29.85
2012	8	12	23	0	0	28.85
2012	8	13	0	0	0	26.85
2012	8	13	1	0	0	26.85
2012	8	13	2	0	0	25.85
2012	8	13	3	0	0	25.85
2012	8	13	4	0	0	24.85
2012	8	13	5	0	0	24.85
2012	8	13	6	0	0	24.85
2012	8	13	7	0	37	26.85
2012	8	13	8	0	283	27.85
2012	8	13	9	0	599	29.85
2012	8	13	10	0	742	31.85
2012	8	13	11	0	916	32.85
2012	8	13	12	0	948	33.85
2012	8	13	13	0	954	33.85
2012	8	13	14	0	933	34.85
2012	8	13	15	0	687	34.85
2012	8	13	16	0	634	34.85
2012	8	13	17	0	153	34.85
2012	8	13	18	0	143	34.85
2012	8	13	19	0	0	33.85
2012	8	13	20	0	0	32.85
2012	8	13	21	0	0	31.85
2012	8	13	22	0	0	30.85
2012	8	13	23	0	0	29.85
2012	8	14	0	0	0	28.85
2012	8	14	1	0	0	27.85
2012	8	14	2	0	0	27.85
2012	8	14	3	0	0	26.85
2012	8	14	4	0	0	26.85
2012	8	14	5	0	0	25.85
2012	8	14	6	0	0	25.85
2012	8	14	7	0	154	27.85
2012	8	14	8	0	352	28.85
2012	8	14	9	0	598	30.85
2012	8	14	10	0	782	31.85
2012	8	14	11	0	915	33.85
2012	8	14	12	0	988	34.85
2012	8	14	13	0	994	34.85
2012	8	14	14	0	933	34.85
2012	8	14	15	0	809	35.85
2012	8	14	16	0	633	35.85
2012	8	14	17	0	419	35.85
2012	8	14	18	0	191	35.85
2012	8	14	19	0	0	34.85
2012	8	14	20	0	0	32.85
2012	8	14	21	0	0	31.85
2012	8	14	22	0	0	29.85
2012	8	14	23	0	0	28.85
2012	8	15	0	0	0	26.85
2012	8	15	1	0	0	26.85
2012	8	15	2	0	0	26.85
2012	8	15	3	0	0	25.85
2012	8	15	4	0	0	25.85
2012	8	15	5	0	0	24.85
2012	8	15	6	0	0	24.85
2012	8	15	7	0	115	26.85
2012	8	15	8	0	353	28.85
2012	8	15	9	0	564	29.85
2012	8	15	10	0	779	31.85
2012	8	15	11	0	913	32.85
2012	8	15	12	0	985	33.85
2012	8	15	13	0	991	33.85
2012	8	15	14	0	929	34.85
2012	8	15	15	0	805	34.85
2012	8	15	16	0	628	34.85
2012	8	15	17	0	415	35.85
2012	8	15	18	0	186	34.85
2012	8	15	19	0	0	33.85
2012	8	15	20	0	0	31.85
2012	8	15	21	0	0	30.85
2012	8	15	22	0	0	28.85
2012	8	15	23	0	0	27.85
2012	8	16	0	0	0	25.85
2012	8	16	1	0	0	25.85
2012	8	16	2	0	0	24.85
2012	8	16	3	0	0	24.85
2012	8	16	4	0	0	23.85
2012	8	16	5	0	0	23.85
2012	8	16	6	0	0	23.85
2012	8	16	7	0	150	25.85
2012	8	16	8	0	374	27.85
2012	8	16	9	0	592	28.85
2012	8	16	10	0	722	30.85
2012	8	16	11	0	907	32.85
2012	8	16	12	0	979	33.85
2012	8	16	13	0	985	33.85
2012	8	16	14	0	923	33.85
2012	8	16	15	0	799	34.85
2012	8	16	16	0	623	34.85
2012	8	16	17	0	410	34.85
2012	8	16	18	0	182	34.85
2012	8	16	19	0	0	32.85
2012	8	16	20	0	0	32.85
2012	8	16	21	0	0	30.85
2012	8	16	22	0	0	29.85
2012	8	16	23	0	0	27.85
2012	8	17	0	0	0	26.85
2012	8	17	1	0	0	26.85
2012	8	17	2	0	0	25.85
2012	8	17	3	0	0	24.85
2012	8	17	4	0	0	24.85
2012	8	17	5	0	0	23.85
2012	8	17	6	0	0	23.85
2012	8	17	7	0	135	25.85
2012	8	17	8	0	372	27.85
2012	8	17	9	0	589	29.85
2012	8	17	10	0	772	30.85
2012	8	17	11	0	905	32.85
2012	8	17	12	0	977	33.85
2012	8	17	13	0	982	33.85
2012	8	17	14	0	920	33.85
2012	8	17	15	0	755	33.85
2012	8	17	16	0	620	33.85
2012	8	17	17	0	376	33.85
2012	8	17	18	0	172	33.85
2012	8	17	19	0	0	32.85
2012	8	17	20	0	0	32.85
2012	8	17	21	0	0	30.85
2012	8	17	22	0	0	29.85
2012	8	17	23	0	0	28.85
2012	8	18	0	0	0	27.85
2012	8	18	1	0	0	27.85
2012	8	18	2	0	0	26.85
2012	8	18	3	0	0	26.85
2012	8	18	4	0	0	25.85
2012	8	18	5	0	0	25.85
2012	8	18	6	0	0	24.85
2012	8	18	7	0	125	25.85
2012	8	18	8	0	253	25.85
2012	8	18	9	0	401	26.85
2012	8	18	10	0	518	26.85
2012	8	18	11	0	306	27.85
2012	8	18	12	0	25	27.85
2012	8	18	13	0	547	26.85
2012	8	18	14	0	870	26.85
2012	8	18	15	0	605	25.85
2012	8	18	16	0	505	25.85
2012	8	18	17	0	148	24.85
2012	8	18	18	0	111	24.85
2012	8	18	19	0	0	23.85
2012	8	18	20	0	0	23.85
2012	8	18	21	0	0	23.85
2012	8	18	22	0	0	22.85
2012	8	18	23	0	0	22.85
2012	8	19	0	0	0	22.85
2012	8	19	1	0	0	22.85
2012	8	19	2	0	0	22.85
2012	8	19	3	0	0	22.85
2012	8	19	4	0	0	22.85
2012	8	19	5	0	0	22.85
2012	8	19	6	0	0	22.85
2012	8	19	7	0	125	22.85
2012	8	19	8	0	113	23.85
2012	8	19	9	0	225	23.85
2012	8	19	10	0	247	24.85
2012	8	19	11	0	381	24.85
2012	8	19	12	0	258	25.85
2012	8	19	13	0	921	26.85
2012	8	19	14	0	643	26.85
2012	8	19	15	0	802	27.85
2012	8	19	16	0	623	28.85
2012	8	19	17	0	407	29.85
2012	8	19	18	0	176	29.85
2012	8	19	19	0	0	28.85
2012	8	19	20	0	0	27.85
2012	8	19	21	0	0	26.85
2012	8	19	22	0	0	26.85
2012	8	19	23	0	0	25.85
2012	8	20	0	0	0	24.85
2012	8	20	1	0	0	24.85
2012	8	20	2	0	0	23.85
2012	8	20	3	0	0	23.85
2012	8	20	4	0	0	23.85
2012	8	20	5	0	0	23.85
2012	8	20	6	0	0	23.85
2012	8	20	7	0	146	24.85
2012	8	20	8	0	376	25.85
2012	8	20	9	0	597	27.85
2012	8	20	10	0	783	28.85
2012	8	20	11	0	919	30.85
2012	8	20	12	0	991	31.85
2012	8	20	13	0	997	31.85
2012	8	20	14	0	933	32.85
2012	8	20	15	0	805	32.85
2012	8	20	16	0	626	32.85
2012	8	20	17	0	407	32.85
2012	8	20	18	0	174	32.85
2012	8	20	19	0	0	31.85
2012	8	20	20	0	0	30.85
2012	8	20	21	0	0	29.85
2012	8	20	22	0	0	28.85
2012	8	20	23	0	0	27.85
2012	8	21	0	0	0	26.85
2012	8	21	1	0	0	25.85
2012	8	21	2	0	0	25.85
2012	8	21	3	0	0	24.85
2012	8	21	4	0	0	23.85
2012	8	21	5	0	0	23.85
2012	8	21	6	0	0	22.85
2012	8	21	7	0	43	23.85
2012	8	21	8	0	286	23.85
2012	8	21	9	0	329	24.85
2012	8	21	10	0	742	25.85
2012	8	21	11	0	908	25.85
2012	8	21	12	0	980	26.85
2012	8	21	13	0	712	25.85
2012	8	21	14	0	273	24.85
2012	8	21	15	0	191	24.85
2012	8	21	16	0	111	23.85
2012	8	21	17	0	99	23.85
2012	8	21	18	0	4	23.85
2012	8	21	19	0	0	22.85
2012	8	21	20	0	0	22.85
2012	8	21	21	0	0	21.85
2012	8	21	22	0	0	21.85
2012	8	21	23	0	0	20.85
2012	8	22	0	0	0	20.85
2012	8	22	1	0	0	20.85
2012	8	22	2	0	0	20.85
2012	8	22	3	0	0	20.85
2012	8	22	4	0	0	19.85
2012	8	22	5	0	0	19.85
2012	8	22	6	0	0	19.85
2012	8	22	7	0	56	21.85
2012	8	22	8	0	287	22.85
2012	8	22	9	0	266	23.85
2012	8	22	10	0	730	24.85
2012	8	22	11	0	441	25.85
2012	8	22	12	0	596	26.85
2012	8	22	13	0	936	27.85
2012	8	22	14	0	675	28.85
2012	8	22	15	0	633	28.85
2012	8	22	16	0	607	29.85
2012	8	22	17	0	390	30.85
2012	8	22	18	0	161	30.85
2012	8	22	19	0	0	29.85
2012	8	22	20	0	0	28.85
2012	8	22	21	0	0	27.85
2012	8	22	22	0	0	26.85
2012	8	22	23	0	0	24.85
2012	8	23	0	0	0	24.85
2012	8	23	1	0	0	23.85
2012	8	23	2	0	0	23.85
2012	8	23	3	0	0	22.85
2012	8	23	4	0	0	22.85
2012	8	23	5	0	0	21.85
2012	8	23	6	0	0	21.85
[truncated: 209 more rows]

## Sheet: Pecan_winter
localhour	mean(sum_use)	sd(sum_use)	mean(sum_grid)	sd(sum_grid)	mean(sum_gen)	sd(sum_gen)
00:00:00	287.573	53.5003	291.051	54.2707	-3.478	2.9238
01:00:00	256.773	52.7769	259.035	53.0867	-2.26221	1.89362
02:00:00	250.335	55.9696	252.489	56.6493	-2.15434	1.77884
03:00:00	257.607	57.3909	259.636	58.1688	-2.02903	1.69599
04:00:00	265.892	60.907	268.074	61.8642	-2.18261	1.94171
05:00:00	282.068	63.1028	285.353	64.2772	-3.28567	3.34374
06:00:00	339.17	82.2161	342.119	83.5361	-2.9485	3.03859
07:00:00	389.281	84.6842	386.39	85.0031	2.89122	8.59608
08:00:00	370.005	57.3587	304.166	82.1562	65.8388	55.9967
09:00:00	359.874	61.0834	198.41	152.442	161.463	120.514
10:00:00	359.734	65.4185	104.374	216.703	255.36	180.129
11:00:00	358	71.992	16.6364	275.133	341.363	231.395
12:00:00	355.949	73.4053	-26.0143	303.274	381.964	259.494
13:00:00	348.226	74.3057	-45.4267	316.18	393.652	270.343
14:00:00	337.684	72.4902	-10.147	306.049	347.831	259.921
15:00:00	344.408	73.8404	71.9177	265.408	272.491	214.143
16:00:00	368.337	76.416	213.427	194.647	154.91	137.567
17:00:00	434.729	81.8076	401.437	120.139	33.2924	50.3881
18:00:00	505.919	77.0823	509.294	77.8143	-3.3753	5.10368
19:00:00	520.155	72.8454	524.937	73.5669	-4.78243	5.56674
20:00:00	505.958	68.2703	510.487	69.0775	-4.52907	4.64375
21:00:00	472.553	60.9216	477.314	61.6942	-4.76195	4.09678
22:00:00	414.816	52.1846	419.257	52.5613	-4.44142	3.66487
23:00:00	341.578	50.8968	345.228	51.5419	-3.65035	3.51275

## Sheet: Pecan_summer
localhour	mean(sum_use)	sd(sum_use)	mean(sum_grid)	sd(sum_grid)	mean(sum_gen)	sd(sum_gen)
00:00:00	602.043	103.52	597.527	102.482	4.51515	2.84433
01:00:00	516.191	92.5176	512.447	92.229	3.74451	2.55169
02:00:00	463.113	84.7116	459.788	84.2893	3.32545	2.45681
03:00:00	430.021	78.8843	426.736	78.2569	3.28578	2.09765
04:00:00	403.615	73.2776	400.687	72.6355	2.92716	1.9295
05:00:00	381.108	67.263	378.393	66.6948	2.71441	1.87666
06:00:00	384.04	59.3578	380.79	59.0559	3.24988	1.95463
07:00:00	406.168	57.4613	376.798	60.7906	29.3697	10.5585
08:00:00	415.674	45.0673	314.551	51.2973	101.124	21.2841
09:00:00	441.205	62.5067	233.807	63.8376	207.398	43.9687
10:00:00	496.583	77.7226	148.671	74.8994	347.912	76.726
11:00:00	568.004	97.1871	103.973	107.892	464.031	109.582
12:00:00	649.897	116.743	116.425	114.034	533.472	126.362
13:00:00	725.099	137.553	138.046	119.798	587.053	126.813
14:00:00	799.04	152.51	206.32	125.383	592.72	120.222
15:00:00	879.513	161.164	307.854	157.029	571.658	100.987
16:00:00	952.222	157.602	470.038	134.203	482.184	104.403
17:00:00	1023.13	152.617	659	140.703	364.131	86.3562
18:00:00	1050.72	156.182	837.584	149.733	213.133	59.9652
19:00:00	1013.92	151.017	937.178	152.745	76.74	32.1795
20:00:00	981.163	143.871	971.212	143.968	9.951	5.78441
21:00:00	944.92	130.159	937.397	129.632	7.52273	3.9164
22:00:00	858.617	116.695	850.5	116	8.11703	3.40126
23:00:00	719.929	108.438	714.98	107.895	4.94862	3.28717
