# Supplementary material
Source: MDPI journal article supplement (https://www.mdpi.com/2073-4336/8/4/45)
Supplement: s1 [file s1 › Part 2 - Data Analysis/Utility (Taipower)/utility_analysis.xlsx]

## Sheet: Daily Load
t	load_winter	load_summer
1	4950	7200
2	4750	6650
3	4650	6300
4	4700	6100
5	4800	6050
6	4900	6000
7	5050	6150
8	5600	6600
9	7100	7750
10	7700	8600
11	8000	9550
12	8200	10250
13	7450	10000
14	7550	9850
15	7950	10250
16	8050	10400
17	8100	10200
18	8200	9750
19	8100	9500
20	7600	9650
21	7250	9550
22	6750	9350
23	6350	8700
24	6000	8050
MAX	8200	10400
MIN	4650	6000

## Sheet: AGU (MW)
							$NTD/$USD	31
	Aggregate Load [MW]		Generation cost [NT$]		Generation cost [NT$]		Generation cost [US$]		Average Cost [US$/MW]
t	load_winter	load_summer	fuel_mt_winter	fuel_mt_summer	fuel_mt_winter	fuel_mt_summer	fuel_mt_winter	fuel_mt_summer	$/MW	$/MW
0	4950	7200	365805	1.08792e+06	2800109	4.00632e+06	90326.1	129236	18.2477	17.9495
1	4750	6650	290225	737818	2724529	3.65622e+06	87888	117942	18.5027	17.7357
2	4650	6300	254355	538020	2688659	3456420	86730.9	111497	18.6518	17.698
3	4700	6100	272130	431880	2706434	3350280	87304.3	108074	18.5754	17.717
4	4800	6050	308640	406258	2742944	3.32466e+06	88482.1	107247	18.4338	17.7268
5	4900	6000	346430	381000	2780734	3299400	89701.1	106432	18.3063	17.7387
6	5050	6150	405515	457868	2839819	3.37627e+06	91607.1	108912	18.14	17.7092
7	5600	6600	646800	708180	3081104	3626580	99390.5	116986	17.7483	17.7252
8	7100	7750	1501650	1.48219e+06	3935954	4.40059e+06	126966	141954	17.8826	18.3167
9	7700	8600	1924230	2178380	4358534	5096780	140598	164412	18.2595	19.1177
10	8000	9550	2152800	3.08131e+06	4587104	5.99971e+06	147971	193539	18.4964	20.2659
11	8200	10250	2311580	3.83094e+06	4745884	6.74934e+06	153093	217721	18.6699	21.241
12	7450	10000	1742555	3555000	4176859	6473400	134737	208819	18.0856	20.8819
13	7550	9850	1814265	3.39382e+06	4248569	6.31222e+06	137051	203620	18.1524	20.6721
14	7950	10250	2113905	3.83094e+06	4548209	6.74934e+06	146716	217721	18.4549	21.241
15	8050	10400	2192015	4.00088e+06	4626319	6.91928e+06	149236	223203	18.5386	21.4618
16	8100	10200	2231550	3.77502e+06	4665854	6.69342e+06	150511	215917	18.5817	21.1683
17	8200	9750	2311580	3.28819e+06	4745884	6.20659e+06	153093	200212	18.6699	20.5346
18	8100	9500	2231550	3030500	4665854	5948900	150511	191900	18.5817	20.2
19	7600	9650	1850600	3.18402e+06	4284904	6.10242e+06	138223	196852	18.1872	20.3992
20	7250	9550	1602975	3.08131e+06	4037279	5.99971e+06	130235	193539	17.9634	20.2659
21	6750	9350	1276425	2.88027e+06	3710729	5.79867e+06	119701	187054	17.7335	20.0058
22	6350	8700	1038225	2267220	3472529	5185620	112017	167278	17.6405	19.2274
23	6000	8050	846600	1.71586e+06	3280904	4.63426e+06	105836	149492	17.6393	18.5705
SUM	159750	202450	32032405	5.33248e+07	90455701	1.23366e+08	2.91793e+06	3.97956e+06	18.256	19.3987	US$/MWh
MIN	4650	6000	254355	381000			86730.9	106432	17.6393	17.698	US$/kWh
MAX	8200	10400	2311580	4.00088e+06			153093	223203	18.6699	21.4618
			4000.88	0					0.018256	0.0193987
									Too Cheap?!
			US$0.066
