# Supplementary material
Source: MDPI journal article supplement (https://www.mdpi.com/2073-4336/8/4/45)
Supplement: s1 [file s1 › Part 3 - Operations Research/joint_scc(nostorage)/joint_summer(sum).dat]

/*********************************************
 * OPL 12.6.1.0 Data
 * Author: rpilling
 * Creation Date: 19/04/2015 at 11:44:43 AM
 *********************************************/

DG = {"MT"};
UG = {"AGU"};
NbPeriods = 24;

demandM = [0.60 0.52 0.46 0.43 0.40 0.38 0.38 0.41 0.42 0.44 0.50 0.57 0.65 0.73 0.80 0.88 0.95 1.02 1.05 1.01 0.98 0.94 0.86 0.72];
demandU = [7200 6650 6300 6100 6050 6000 6150 6600 7750 8600 9550 10250 10000 9850 10250 10400 10200 9750 9500 9650 9550 9350 8700 8050];
PVout = [0.00 0.00 0.00 0.00 0.00 0.00 0.02 0.20 0.42 0.66 0.89 1.03 1.07 1.06 1.01 0.87 0.70 0.48 0.24 0.04 0.00 0.00 0.00 0.00];

aM = [0.1105];
bM = [20.56];
cM = [25.77];

aU = [0.0023548387096774];
bU = [12.08064516129032];
cU = [94141.93548387097];

minpowerM = [0];
maxpowerM = [4.33];
