# Supplementary material
Source: MDPI journal article supplement (https://www.mdpi.com/2073-4336/8/4/45)
Supplement: s1 [file s1 › Part 3 - Operations Research/joint_scc(nostorage)/joint_winter(sum).dat]

/*********************************************
 * OPL 12.6.1.0 Data
 * Author: rpilling
 * Creation Date: 19/04/2015 at 11:44:43 AM
 *********************************************/

DG = {"MT"};
UG = {"AGU"};
NbPeriods = 24;

demandM = [0.29 0.26 0.25 0.26 0.27 0.28 0.34 0.39 0.37 0.36 0.36 0.36 0.36 0.35 0.34 0.34 0.37 0.43 0.51 0.52 0.51 0.47 0.41 0.34];
PVout = [0.00 0.00 0.00 0.00 0.00 0.00 0.00 0.00 0.06 0.21 0.36 0.47 0.57 0.59 0.54 0.45 0.32 0.13 0.00 0.00 0.00 0.00 0.00 0.00];
demandU = [4950 4750 4650 4700 4800 4900 5050 5600 7100 7700 8000 8200 7450 7550 7950 8050 8100 8200 8100 7600 7250 6750 6350 6000];

aM = [0.1105];
bM = [20.56];
cM = [25.77];

aU = [0.0020645161290323];
bU = [7.835483870967742];
cU = [78525.93548387097];

minpowerM = [0];
maxpowerM = [4.33];
