# Supplementary material
Source: MDPI journal article supplement (https://www.mdpi.com/2073-4336/8/4/45)
Supplement: s1 [file s1 › Part 3 - Operations Research/scc90_utility/scc90_summer.dat]

/*********************************************
 * OPL 12.6.1.0 Data
 * Author: rpilling
 * Creation Date: 19/04/2015 at 11:44:43 AM
 *********************************************/

G = {"AGU"};
NbPeriods = 24;
demand = [7200 6650 6300 6100 6050 6000 6150 6600 7750 8600 9550 10250 10000 9850 10250 10400 10200 9750 9500 9650 9550 9350 8700 8050];
A = [0.0023548387096774];
B = [12.08064516129032];
C = [94141.93548387097];
