# Supplementary material
Source: MDPI journal article supplement (https://www.mdpi.com/2073-4336/8/4/45)
Supplement: s1 [file s1 › Part 3 - Operations Research/scc90_utility/scc90_winter.dat]

/*********************************************
 * OPL 12.6.1.0 Data
 * Author: rpilling
 * Creation Date: 19/04/2015 at 11:44:43 AM
 *********************************************/

G = {"AGU"};
NbPeriods = 24;
demand = [4950 4750 4650 4700 4800 4900 5050 5600 7100 7700 8000 8200 7450 7550 7950 8050 8100 8200 8100 7600 7250 6750 6350 6000];
A = [0.0020645161290323];
B = [7.835483870967742];
C = [78525.93548387097];
