# Supplementary material
Source: MDPI journal article supplement (https://www.mdpi.com/2073-4336/8/4/45)
Supplement: s1 [file s1 › Part 3 - Operations Research/thesis_mg_case2/case2_summer.dat]

/*********************************************
 * OPL 12.6.1.0 Data
 * Author: rpilling
 * Creation Date: 19/04/2015 at 11:44:43 AM
 *********************************************/

DG = {"MT"};
ESS = {"EV"};
NbPeriods = 24;
demandM = [0.60 0.52 0.46 0.43 0.40 0.38 0.38 0.41 0.42 0.44 0.50 0.57 0.65 0.73 0.80 0.88 0.95 1.02 1.05 1.01 0.98 0.94 0.86 0.72];
PVout = [0.00 0.00 0.00 0.00 0.00 0.00 0.02 0.20 0.42 0.66 0.89 1.03 1.07 1.06 1.01 0.87 0.70 0.48 0.24 0.04 0.00 0.00 0.00 0.00];

// Distributed Generation (DG)
mcM = [85];
fcM = [41.1];
minpowerM = [0];
maxpowerM = [0.98];

// Energy Storage System (ESS)
fcS = [0];
maxin = [0.01];
maxout = [0.01];
eff_c = [0.9];
eff_d = [0.9];
ceS = [0.0116];
