# Supplementary material
Source: MDPI journal article supplement (https://www.mdpi.com/2073-4336/8/4/45)
Supplement: s1 [file s1 › Part 3 - Operations Research/thesis_mg_case2/case2_winter.dat]

/*********************************************
 * OPL 12.6.1.0 Data
 * Author: rpilling
 * Creation Date: 19/04/2015 at 11:44:43 AM
 *********************************************/

DG = {"MT"};
ESS = {"EV"};
NbPeriods = 24;

demandM = [0.29 0.26 0.25 0.26 0.27 0.28 0.34 0.39 0.37 0.36 0.36 0.36 0.36 0.35 0.34 0.34 0.37 0.43 0.51 0.52 0.51 0.47 0.41 0.34];
PVout = [0.00 0.00 0.00 0.00 0.00 0.00 0.00 0.00 0.06 0.21 0.36 0.47 0.57 0.59 0.54 0.45 0.32 0.13 0.00 0.00 0.00 0.00 0.00 0.00];

// Distributed Generation (DG)
mcM = [85];
fcM = [41.1];
minpowerM = [0];
maxpowerM = [0.52];

// Energy Storage System (ESS)
fcS = [0];
maxin = [0.01];
maxout = [0.01];
eff_c = [0.9];
eff_d = [0.9];
ceS = [0.0116];
