# Supplementary material
Source: MDPI journal article supplement (https://www.mdpi.com/2073-4336/8/4/45)
Supplement: s1 [file s1 › Readme - Supplementary Material.pdf]

## Supplementary Files

|                                |                                                                                                                                                                                                                                                                                                                                                                                                                                                                                                                   |
|--------------------------------|-------------------------------------------------------------------------------------------------------------------------------------------------------------------------------------------------------------------------------------------------------------------------------------------------------------------------------------------------------------------------------------------------------------------------------------------------------------------------------------------------------------------|
| <b>Name</b>                    | Robin Pilling                                                                                                                                                                                                                                                                                                                                                                                                                                                                                                     |
| <b>Title</b>                   | Shapley Value-based Payment Calculation for Energy Exchange between Micro- and Utility Grids                                                                                                                                                                                                                                                                                                                                                                                                                      |
| <b>Submission</b>              | 29.07.2017                                                                                                                                                                                                                                                                                                                                                                                                                                                                                                        |
| <b>Supplementary file list</b> | <p>The supplementary files containing a total of three parts</p> <ul style="list-style-type: none"><li>● Part 1: Data (Database)</li><li>● Part 2: Drawings from analysis (Excel)</li><li>● Part 3: : Smart Grid Operations (CPLEX Algorithm)<ul style="list-style-type: none"><li>- 3.1 Microgrid Generation (No Storage)</li><li>- 3.2 Microgrid Generation (Storage)</li><li>- 3.3 Utility Generation</li><li>- 3.4 Joint Generation (No Storage)</li><li>- 3.5 Joint Generation (Storage)</li></ul></li></ul> |

# Part 1: Data

- **Pecan Street Research Dataport** (<https://dataport.pecanstreet.org/>)

Our results are presented for the residential load and PV generation data obtained for the Mueller community as of April 2015. We executed the query and exported data from the Pecan Street Data base at April 13, 2015. To query the database, users must register online. Figure 1 illustrates the data query process:

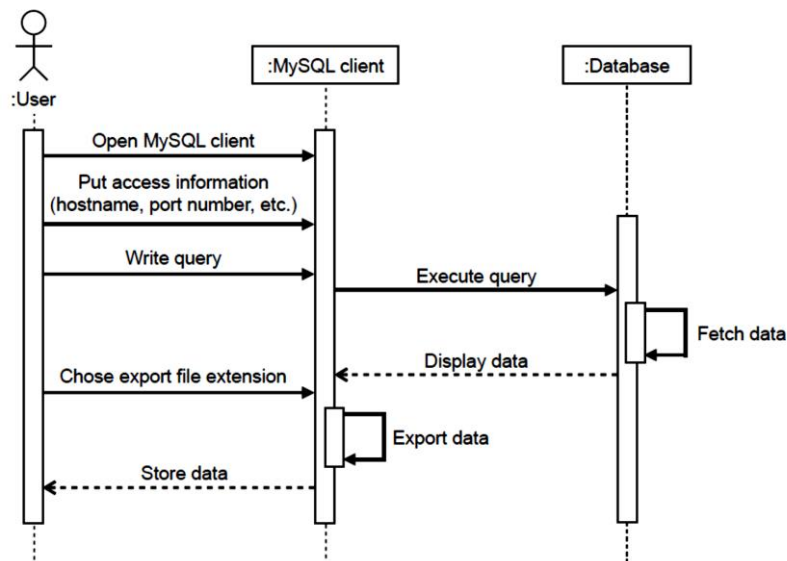

Figure 1. A data access sequence diagram for the Pecan Street Database using a MySQL client

We use pgAdminIII (<http://www.pgadmin.org/>) as MySQL client to query the database.

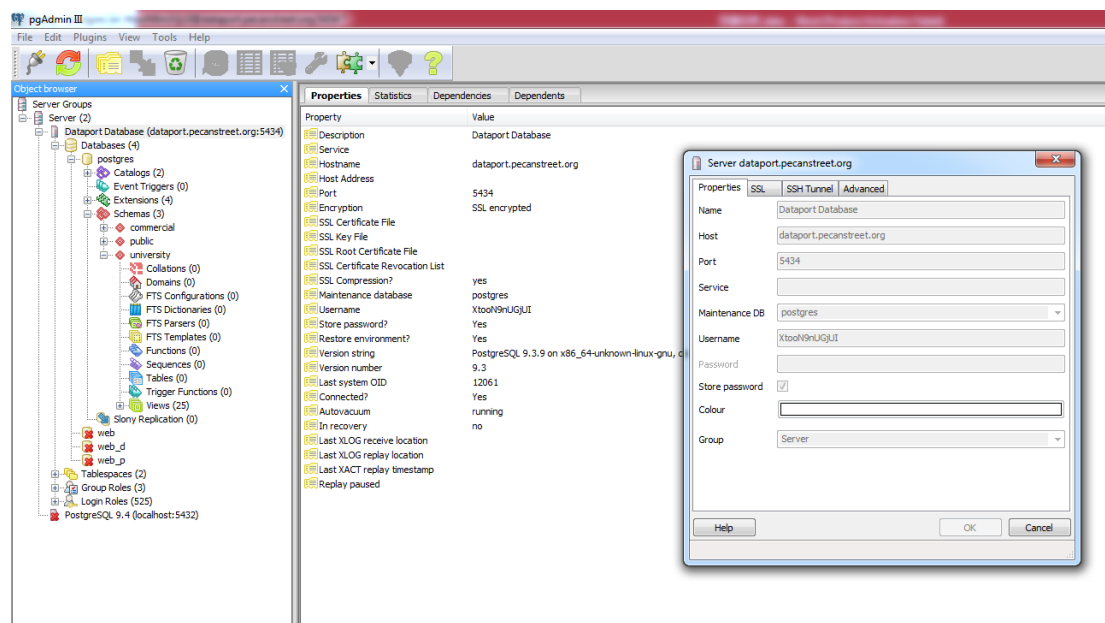

- **Microgrid Load**

*a. Pecan Street Dataport Query*

The query extracts the sum of the whole home consumption (sum(use) as sum\_use) for a certain period of time (localhour between 'YYYY-MM-DD' and 'YYYY-MM-DD ') as an aggregate function for the single-family homes which participated in the Mueller microgrid (Energy Demonstration Project) (program\_energy\_internet\_demo = 'yes'). For convenience, the data is then grouped and ordered by local hour.

SQL Query for the summer scenario:

The screenshot shows a PostgreSQL SQL Editor window titled "Query - postgres on XtoeN9uGjUj@dataport.pecanstreet.org:5434". The SQL Editor tab is active, displaying the following query:

```
SELECT sum(grid) as sum_grid, sum(use) as sum_use, sum(use) - sum(grid) as sum_gen, localhour FROM university.electricity_egauge_hours
WHERE (dataid IN (SELECT dataid FROM university.metadata WHERE program_energy_internet_demo = 'yes') and (localhour between '2014-06-01' and '2014-08-31'))
group by localhour
order by localhour
```

The Output pane shows the results of the query, which are grouped by local hour. The results are displayed in a table with the following columns: sum\_grid, sum\_use, sum\_gen, and localhour. The data is sorted by local hour, showing hourly consumption and generation data for the summer period.

|    | sum_grid<br>numeric         | sum_use<br>numeric         | sum_gen<br>numeric       | localhour<br>timestamp with time zone |
|----|-----------------------------|----------------------------|--------------------------|---------------------------------------|
| 1  | 492.4861666666666733336     | 495.706716666666666723334  | 1.2201999999999999999    | 2014-06-01 00:00:00-05                |
| 2  | 432.191466666666666690005   | 435.780716666666666700003  | 3.589250000000000000999  | 2014-06-01 01:00:00-05                |
| 3  | 376.521416666666666610004   | 377.673216666666666616670  | 1.1518000000000000006666 | 2014-06-01 02:00:00-05                |
| 4  | 323.274500000000000003336   | 324.369366666666666700005  | 1.09286666666666666669   | 2014-06-01 03:00:00-05                |
| 5  | 286.533616666666666699999   | 287.469733333333333353334  | 0.915916666666666666335  | 2014-06-01 04:00:00-05                |
| 6  | 269.0831333333333329335     | 270.14491666666666664668   | 1.061783333333333353333  | 2014-06-01 05:00:00-05                |
| 7  | 262.677650000000000006471   | 263.53456666666666666667   | 0.85691666666666679996   | 2014-06-01 06:00:00-05                |
| 8  | 254.446166666666666680001   | 255.311766666666666663333  | 0.86415000000000003332   | 2014-06-01 07:00:00-05                |
| 9  | 245.48511666666666666668    | 246.350363333333333306665  | 0.86524666666666669997   | 2014-06-01 08:00:00-05                |
| 10 | 239.937000000000000043341   | 240.8066666666666706673    | 0.86966666666666663332   | 2014-06-01 09:00:00-05                |
| 11 | 234.42649999999999996666    | 235.293333333333333316668  | 0.866833333333333319999  | 2014-06-01 10:00:00-05                |
| 12 | 229.267733333333333366664   | 230.136666666666666653335  | 0.868933333333333326674  | 2014-06-01 11:00:00-05                |
| 13 | 224.1043963333333333426666  | 225.000000000000000053330  | 0.895603666666666666664  | 2014-06-01 12:00:00-05                |
| 14 | 219.13174531666666666633330 | 220.00000000000000006667   | 0.868283333333333323337  | 2014-06-01 13:00:00-05                |
| 15 | 214.2275319166666666673331  | 215.00000000000000006668   | 0.772468333333333326337  | 2014-06-01 14:00:00-05                |
| 16 | 209.224952299999999997330   | 210.00000000000000006668   | 0.777070666666666668338  | 2014-06-01 15:00:00-05                |
| 17 | 204.001516666666666639999   | 205.00000000000000006663   | 0.998483333333333326664  | 2014-06-01 16:00:00-05                |
| 18 | 199.472470766666666666668   | 200.00000000000000000000   | 0.522529333333333333332  | 2014-06-01 17:00:00-05                |
| 19 | 194.669732666666666666673   | 195.182949999999999980005  | 0.516202333333333333332  | 2014-06-01 18:00:00-05                |
| 20 | 189.76752631666666666663334 | 190.00000000000000000000   | 0.232373333333333333333  | 2014-06-01 19:00:00-05                |
| 21 | 184.8572529666666666706671  | 185.00000000000000000004   | 0.142747333333333333333  | 2014-06-01 20:00:00-05                |
| 22 | 179.829409049999999998665   | 180.0000000000000000332    | 0.171590999999999999999  | 2014-06-01 21:00:00-05                |
| 23 | 174.7537120666666666676664  | 175.00000000000000004665   | 0.246283333333333333333  | 2014-06-01 22:00:00-05                |
| 24 | 169.6185079833333333313331  | 170.00000000000000003330   | 0.381202333333333333333  | 2014-06-01 23:00:00-05                |
| 25 | 164.606683333333333300002   | 165.00000000000000004335   | 0.393316666666666663333  | 2014-06-02 00:00:00-05                |
| 26 | 159.422759033333333328336   | 160.000000000000000030005  | 0.575246666666666666669  | 2014-06-02 01:00:00-05                |
| 27 | 154.368228333333333380006   | 155.00000000000000003338   | 0.631766666666666666666  | 2014-06-02 02:00:00-05                |
| 28 | 149.3464101166666666679998  | 150.00000000000000003331   | 0.653589999999999999999  | 2014-06-02 03:00:00-05                |
| 29 | 144.3179496166666666680000  | 145.000000000000000036339  | 0.682033333333333333339  | 2014-06-02 04:00:00-05                |
| 30 | 139.3169009666666666686664  | 140.00000000000000006660   | 0.683003333333333333333  | 2014-06-02 05:00:00-05                |
| 31 | 134.35132901666666666836666 | 135.000000000000000079999  | 0.648699999999999999999  | 2014-06-02 06:00:00-05                |
| 32 | 129.3516489000000000033330  | 130.000000000000000071335  | 0.648316666666666666666  | 2014-06-02 07:00:00-05                |
| 33 | 124.3784937500000000026663  | 125.00000000000000003329   | 0.621500000000000000000  | 2014-06-02 08:00:00-05                |
| 34 | 119.3457096499999999956661  | 120.0000000000000000310003 | 0.653203333333333333342  | 2014-06-02 09:00:00-05                |
| 35 | 114.3363850000000000063331  | 115.000000000000000010002  | 0.661516666666666666666  | 2014-06-02 10:00:00-05                |

*SELECT sum(grid) as sum\_grid, sum(use) as sum\_use, sum(use) - sum(grid) as sum\_gen, localhour  
FROM university.electricity\_egauge\_hours*

*WHERE (dataid IN (SELECT dataid FROM university.metadata WHERE  
program\_energy\_internet\_demo = 'yes') and (localhour between '2014-06-01' and '2014-08-31'))*

*group by localhour*

*order by localhour*

## SQL Query for the winter scenario:

The screenshot shows a PostgreSQL SQL Editor window with the following query:

```
SELECT sum(grid) as sum_grid, sum(use) as sum_use, sum(use) - sum(grid) as sum_gen, localhour FROM university.electricity_egaug_hours WHERE (dataid IN (SELECT dataid FROM university.metadata WHERE program_energy_internet_demo = 'yes') and (localhour between '2014-12-01' and '2015-02-28')) group by localhour order by localhour;
```

The output pane displays a table with 5 columns: **sum\_grid numeric**, **sum\_use numeric**, **sum\_gen numeric**, and **localhour timestamp with time zone**. The table contains 35 rows of data, representing hourly electricity usage and generation for the specified period.

*SELECT sum(grid) as sum\_grid, sum(use) as sum\_use, sum(use) - sum(grid) as sum\_gen, localhour  
FROM university.electricity\_egaug\_hours*

*WHERE (dataid IN (SELECT dataid FROM university.metadata WHERE  
program\_energy\_internet\_demo = 'yes') and (localhour between '2014-12-01' and '2015-02-28'))*

*group by localhour*

*order by localhour*

### b. Pecan Street Data Export to Microsoft Excel

- i. For the daily loads in summer, open the .xlsx-file **subquery\_summer(sum)** in Directory **Part 1 - Data\Microgrid Load (Pecan Street)**
- ii. For the daily loads in winter, open the .xlsx-file **subquery\_winter(sum)** in Directory **Part 1 - Data\Microgrid Load (Pecan Street)**

**Remember:** The residential load data for summer and winter was created as the mean over all hourly loads during the queried time span.

- **Microturbine Generation**

To model the generation cost curve for the Centaur 50 gas turbine as a quadratic function a similar heat rate curve in comparison to the Mercury 50 gas turbine was assumed. The cost function is plotted as illustrated in the writer **C50(MGT)** in the .xlsx-file **mueller\_analysis** in **Directory Part 2 – Data Analysis\Microgrid (Mueller)**

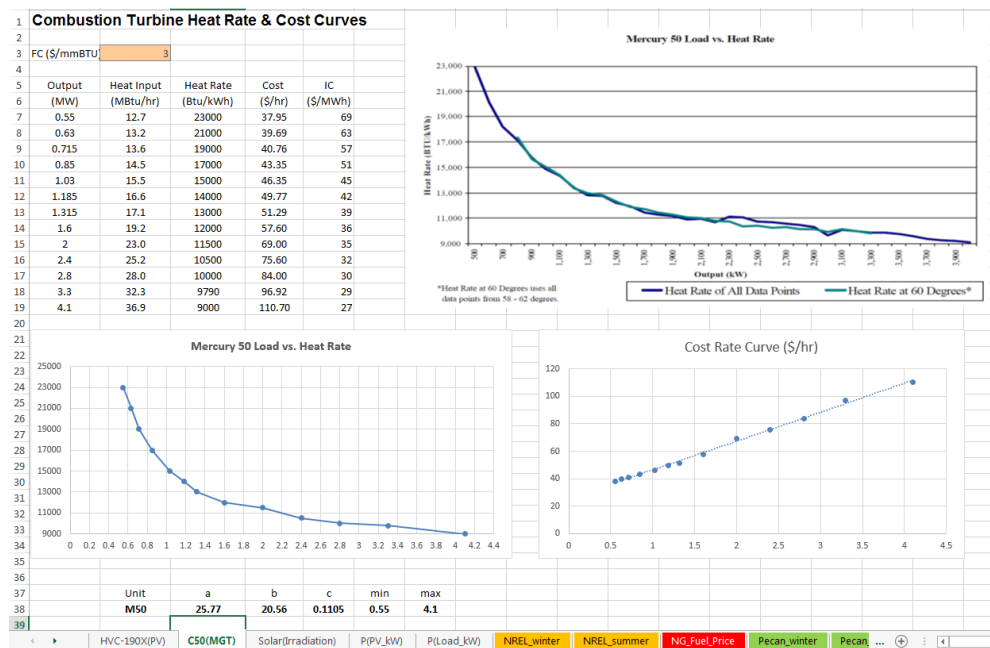

- **PV Generation**

As shown by the data queries, as of April 2015, 630 single-family homes including 256 house equipped with roof-mounted PV systems at an average per-home size of 5.5 kWh (pv = 'yes') were selected for the Energy Demonstration Project (program\_energy\_internet\_demo = 'yes').

| Output pane |          |                                                |
|-------------|----------|------------------------------------------------|
| Data Output | Explain  | Messages History                               |
| dataid      | smallint | program_energy_internet_demo character varying |
| 611         | 7474     | yes                                            |
| 612         | 8596     | yes                                            |
| 613         | 8995     | yes                                            |
| 614         | 4375     | yes                                            |
| 615         | 503      | yes                                            |
| 616         | 4473     | yes                                            |
| 617         | 5809     | yes                                            |
| 618         | 7973     | yes                                            |
| 619         | 5718     | yes                                            |
| 620         | 668      | yes                                            |
| 621         | 994      | yes                                            |
| 622         | 3510     | yes                                            |
| 623         | 6460     | yes                                            |
| 624         | 3310     | yes                                            |
| 625         | 9001     | yes                                            |
| 626         | 9333     | yes                                            |
| 627         | 3126     | yes                                            |
| 628         | 8857     | yes                                            |
| 629         | 6248     | yes                                            |
| 630         | 5749     | yes                                            |

| Output pane |          |                                                |
|-------------|----------|------------------------------------------------|
| Data Output | Explain  | Messages History                               |
| dataid      | smallint | program_energy_internet_demo character varying |
| 237         | 8046     | yes                                            |
| 238         | 7793     | yes                                            |
| 239         | 5786     | yes                                            |
| 240         | 2323     | yes                                            |
| 241         | 4296     | yes                                            |
| 242         | 499      | yes                                            |
| 243         | 9647     | yes                                            |
| 244         | 6691     | yes                                            |
| 245         | 6061     | yes                                            |
| 246         | 7719     | yes                                            |
| 247         | 974      | yes                                            |
| 248         | 2361     | yes                                            |
| 249         | 8995     | yes                                            |
| 250         | 7973     | yes                                            |
| 251         | 668      | yes                                            |
| 252         | 3310     | yes                                            |
| 253         | 3126     | yes                                            |
| 254         | 8857     | yes                                            |
| 255         | 6248     | yes                                            |
| 256         | 5749     | yes                                            |

### c. Solar Irradiation Data

The solar irradiation data was received from the National Solar Radiation Database of the National Renewable Energy Laboratory (NREL). Average solar irradiation data was queried for Austin, Texas for summer (Jun 1 - Aug 31, 2012) and winter (Dec 1, 2011 - Feb 28, 2012). The data can be downloaded from

<https://mapsbeta.nrel.gov/nsrdb-viewer/#/?activeLayers=0&baseLayer=groad&mapCenter=30.300723217778742%2C-97.61850357055664&zoomLevel=12>

A backup can also be found in the Directory **Part 1- Data\Solar irradiation (NREL)**.

### d. Solar Irradiation Data Export to Microsoft Excel

The irradiation data is then exported to the **.xlsx-file mueller\_analysis** in the Directory **Part 2 – Data Analysis\Microgrid (Mueller)** and plotted for summer and winter.

## • Net Renewable Electricity Usage and Storage Potential

The net renewable electricity usage in the Mueller Community was generated by comparing the total demand from the residential loads with the potential PV generation during both summer and winter days. The plotted figures are generated by the data imports using Excel. The figures can be found under the writer **P(Load)** in the **.xlsx-file mueller\_analysis** in the Directory **Part 2 - Data Analysis\Microgrid (Mueller)** plotted for summer and winter.

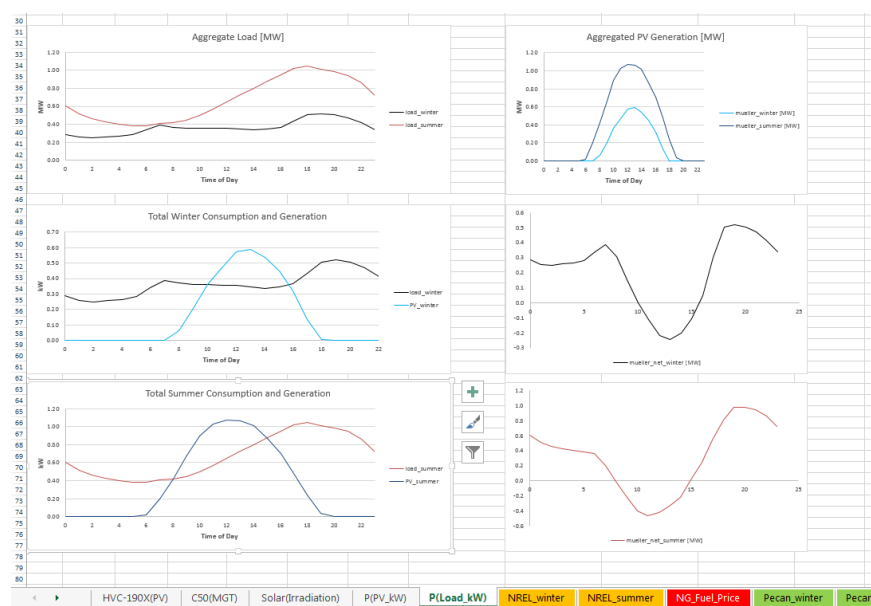

- **Utility Load**

The utility load was obtained for a the weekly load profile in Chang et al. [CCC90] and plotted for a single day period under the writer **Daily Load** in in the .xlsx-file **utility\_analysis** in the Directory **Part 2 - Data Analysis\Utility (Taipower)**.

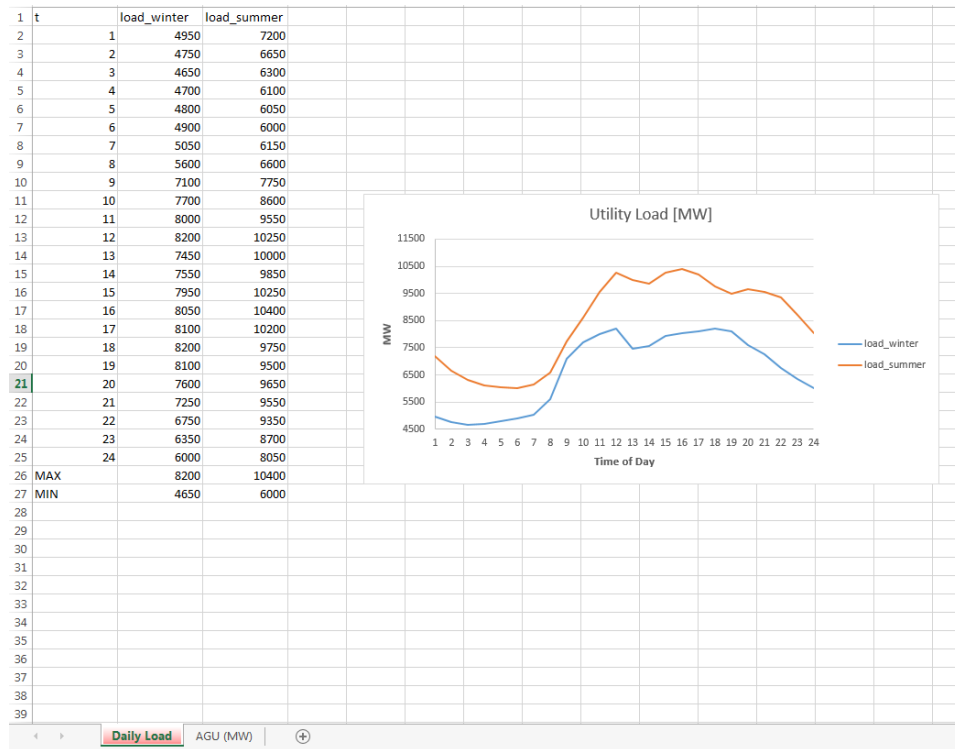

## **Part 2: Data Analysis**

The generation profiles for the microgrid, utility and joint generation are plotted with Excel and can be found in the .xlsx-file **jointgen\_analysis** under the Directory **Part 2 – Data Analysis\Joint Generation (Interconnection)**.

|                                                                            |                                                                   |
|----------------------------------------------------------------------------|-------------------------------------------------------------------|
| Microgrid generation without storage for summer and winter days (in MW)    | <b>jointgen_analysis</b><br><b>Spreadsheet: Microgrid</b>         |
| Microturbine generation with storage during summer and winter days (in MW) | <b>jointgen_analysis</b><br><b>Spreadsheet: Microgrid</b>         |
| Storage output during summer and winter days (in MW)                       | <b>jointgen_analysis</b><br><b>Spreadsheet: Microgrid</b>         |
| Aggregated thermal generation for summer and winter days (in MW)           | <b>jointgen_analysis</b><br><b>Spreadsheet: Utility</b>           |
| Joint generation without storage during summer days (in MW)                | <b>jointgen_analysis</b><br><b>Spreadsheet: Joint(no_storage)</b> |
| Joint generation without storage during winter days (in MW)                | <b>jointgen_analysis</b><br><b>Spreadsheet: Joint(no_storage)</b> |
| Joint generation with storage during summer and winter days (in MW)        | <b>jointgen_analysis</b><br><b>Spreadsheet: Joint(storage)</b>    |
| Storage output during summer and winter days (in MW)                       | <b>jointgen_analysis</b><br><b>Spreadsheet: Joint(storage)</b>    |
| Generation scenarios between Taipower and the Mueller microgrid            | <b>jointgen_analysis</b><br><b>Spreadsheet: Coalition values</b>  |
| Coalition values and cost savings for Taipower and the Mueller microgrid   | <b>jointgen_analysis</b><br><b>Spreadsheet: Shapley Value</b>     |

## Part 3: Operations Research

### Part 3.1: Microgrid Generation (No Storage) – CPLEX

- Executive Software
  - ILOG CPLEX Studio IDE 12.2 @ HPZ400
- Code file in **Part 3 - Operations Research\thesis\_mg\_case1**
  - mg\_case1\_quadratic.mod
  - case1\_summer.dat
  - case1\_winter.dat
- Description: This optimization algorithm minimizes the standalone generation cost of the microgrid without storage for summer and winter.
- Steps
  - Step 1: Click the desktop "OPL IDE"
  - Step 2: Expand thesis\_mg\_case1 by left-click

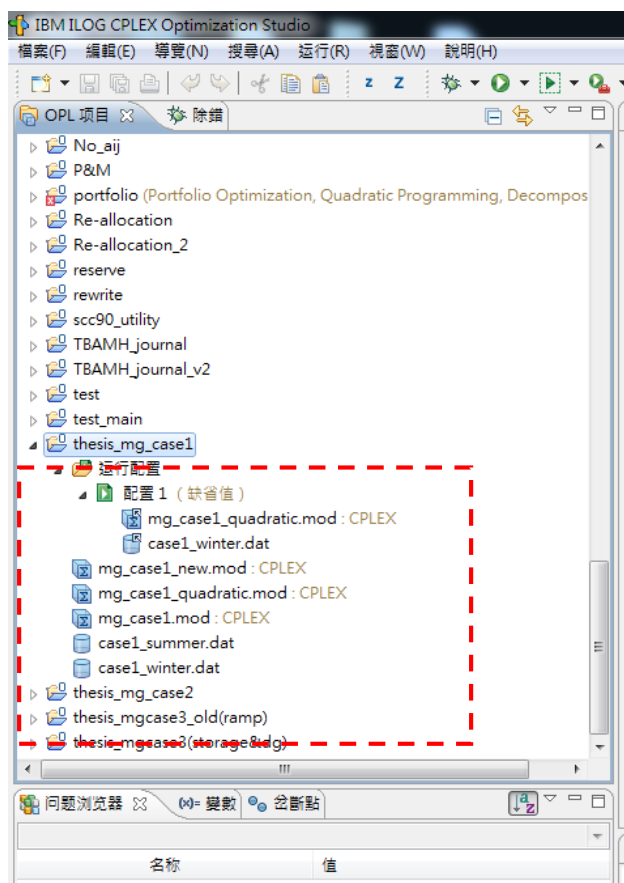

- Step 3: Select the model file **mg\_case1\_quadratic.mod** and move it into the "Basic configuration" subfolder.

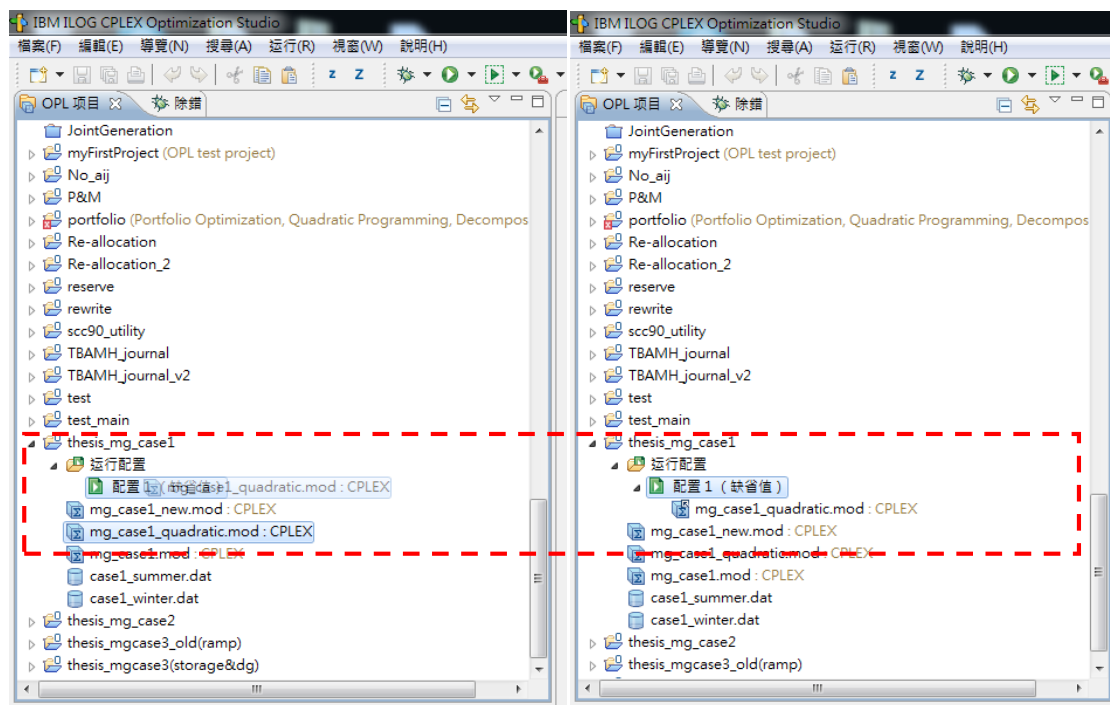

- Step 4: Select the respective data file for summer **case1\_summer.dat** or winter **case1\_winter.dat** and also move it into the "Basic configuration" subfolder.

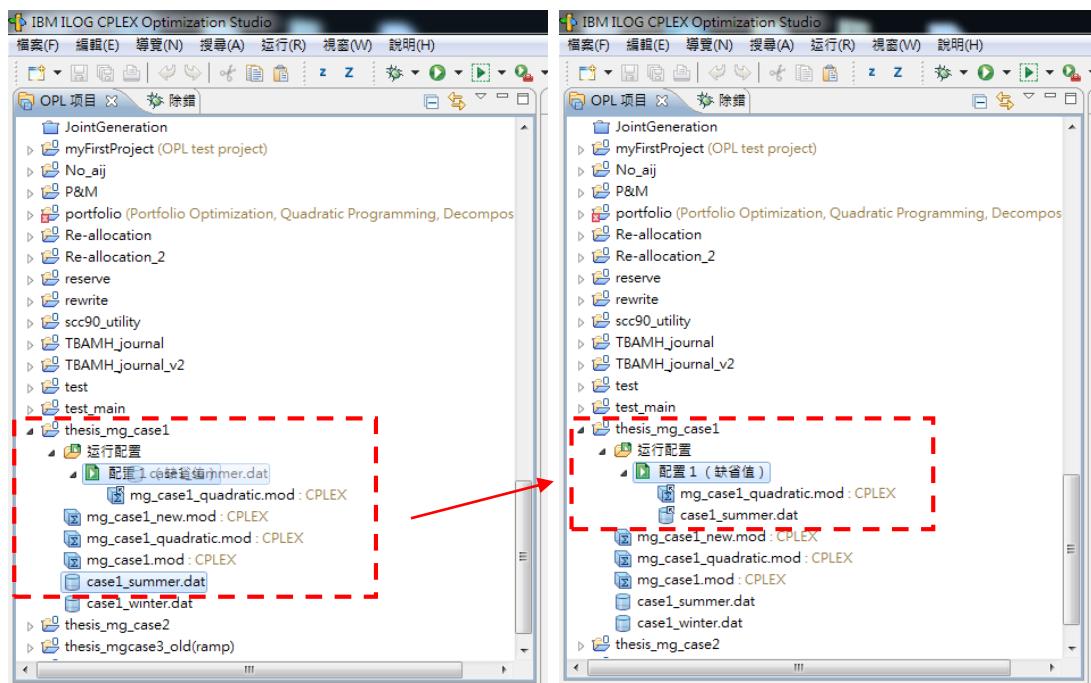

- Step 5: Execute the algorithm by right-click on the "Basic Configuration" and left-click on the appearing "Run"-Button

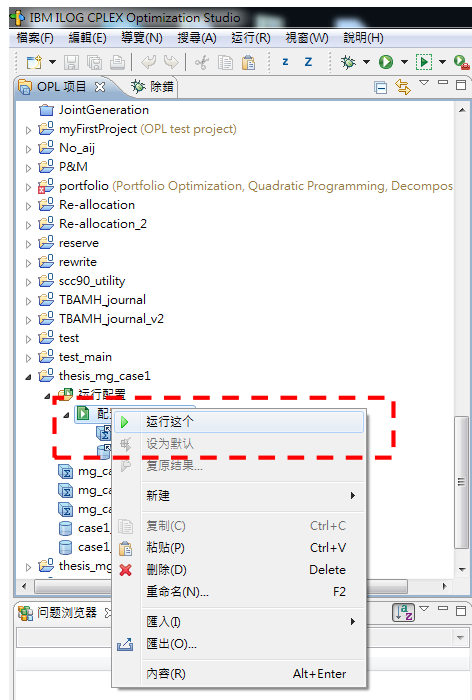

- Step 6: In the "Script Log" to view the results of algorithm

## case1\_summer.dat

The screenshot shows the IBM ILOG CPLEX Optimization Studio interface with the 'Script Log' pane open. The log displays the results of the algorithm for 'mg\_case1\_quadratic.mod'. The log includes the following information:

- Model Information:** OPL 12.6.1.0 Model, Author: rpling, Creation Date: 20/04/2015 at 11:10:05 PM.
- Declare sets:** DG, NbPeriods, Periods.
- Declare microgrid input variables:** A, B, C, minpowerM, maxpowerM.
- Declare microgrid decision variables:** xM, m.
- Objective function (capacity):** minimize sum(k in DG, t in Periods) (A[k]\*xM[k][t]^2 + B[k]\*xM[k][t] + m[t]\*C[k]);
- Solution (optimal) with objective 632.901081099954:**
  - Quality Incumbent solution:
  - MIQP objective: 6.3290108110e+002
  - MIQP solution norm |x| (Total, Max): 6.04400e+001 1.00000e+000
  - MIQP solution error (Ax=b) (Total, Max): 0.00000e+000 0.00000e+000
  - MIQP x bound error (Total, Max): 0.00000e+000 0.00000e+000
  - MIQP x integrality error (Total, Max): 0.00000e+000 0.00000e+000
  - MIQP slack bound error (Total, Max): 2.20535e-012 1.29896e-013
  - MIQP indicator slack bound error (Total, Max): 0.00000e+000 0.00000e+000
- MIQP solution:**
  - xM: [[0.6, 0.52, 0.46, 0.43, 0.4, 0.38, 0.36, 0.21, 0, 0, 0, 0, 0, 0, 0.01, 0.25, 0.54, 0.81, 0.97, 0.98, 0.94, 0.86, 0.72]]
  - m: [1, 1, 1, 1, 1, 1, 1, 0, 0, 0, 0, 0, 0, 0, 1, 1, 1, 1, 1, 1, 1, 1]
- Constraints:**
  - ctDemand: sum(k in DG) xM[k][t] >= demandM[t]
  - ctDGLowerLimit: xM[k][t] >= minpowerM[k]
  - ctDGUpperLimit: xM[k][t] <= maxpowerM[k]

**case1\_winter.dat**

The screenshot displays the CPLEX Studio 12.6.1.0 interface. The left pane shows the project structure for 'mg\_case1', including files like 'mg\_case1\_quadratic.mod', 'mg\_case1\_new.mod', and 'mg\_case1\_quadratic.mod'. The right pane shows the source code of 'mg\_case1\_quadratic.mod', which defines a Quadratic Programming (QP) model with parameters like 'NbPeriods', 'demandM', and 'minpowerM'. The bottom pane shows the solution results for the problem '585.613485'. The results are organized into sections: '数据 (10)' (Data), '决策变量 (2)' (Decision Variables), and '约束 (3)' (Constraints). The '数据' section lists parameters like 'd', 'demandM', 'dG', 'maxpowerM', 'minpowerM', 'NbPeriods', and 'Pivot'. The '决策变量' section shows the optimal values for 'xM'. The '约束' section shows the slack and surplus for constraints 'ctDemand', 'ctDGLowerLimit', and 'ctDGUpperLimit'.

| 名称             | 值                                                                       |
|----------------|-------------------------------------------------------------------------|
| d              | [0.1105]                                                                |
| dG             | [25.77]                                                                 |
| demandM        | [0.29 0.26 0.25 0.26 0.27 0.28 0.34 0.39 0.31 0.15 0 0 0 0 0 0 0 0 0 0] |
| dG             | ["MT"]                                                                  |
| maxpowerM      | [4.33]                                                                  |
| minpowerM      | [0]                                                                     |
| NbPeriods      | 24                                                                      |
| Periods        | 1.24                                                                    |
| Pivot          | [0 0 0 0 0 0 0 0 0 0 0 0 0 0 0 0 0 0 0 0]                               |
| 决策变量 (2)       |                                                                         |
| xM             | [1 1 1 1 1 1 1 1 0 0 0 0 0 0 1 1 1 1 1 1]                               |
| xM             | [0.29 0.26 0.25 0.26 0.27 0.28 0.34 0.39 0.31 0.15 0 0 0 0 0 0 0 0 0 0] |
| 约束 (3)         |                                                                         |
| ctDemand       | sum(k in DG) xM[k][0] >= demandM[k]                                     |
| ctDGLowerLimit | xM[k][0] >= minpowerM[k]                                                |
| ctDGUpperLimit | xM[k][0] <= maxpowerM[k]                                                |

## Part III.2: Microgrid Generation (Storage) – CPLEX

- Executive Software
  - ILOG CPLEX Studio IDE @ HPZ400
- Code file in **Part 3 - Operations Research\thesis\_mg\_case2**
  - mg\_case2\_quadratic.mod
  - case2\_summer(quadratic).dat
  - case2\_winter(quadratic).dat
- Description: This optimization algorithm minimizes the standalone generation cost of the microgrid with storage for summer and winter.
- Steps
  - Step 1: Click the desktop "OPL IDE"
  - Step 2: Expand thesis\_mg\_case2 by left-click

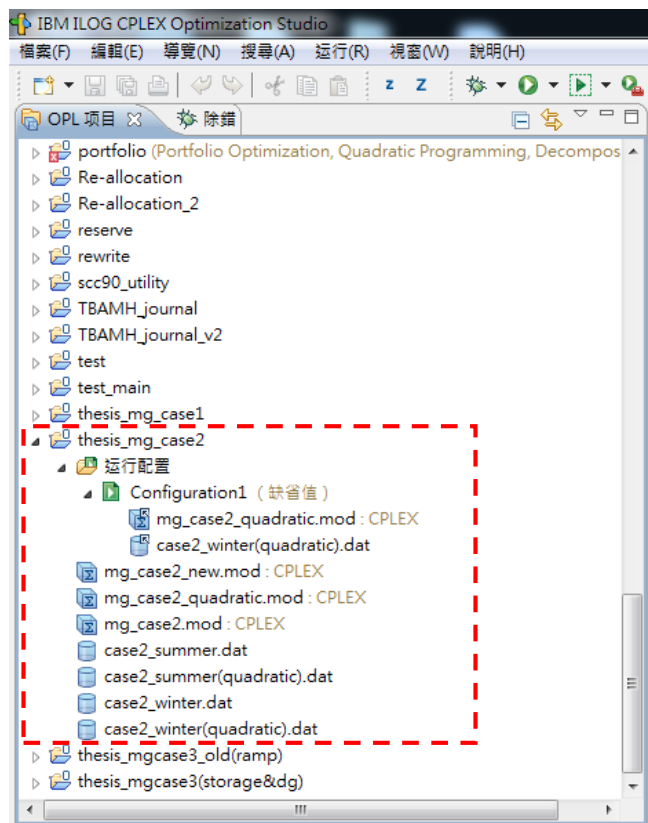

- Step 3: Select the model file **mg\_case2\_quadratic.mod** and move it into the "Basic configuration" subfolder. (*compare with III.1*)
- Step 4: Select the data file for summer **case2\_summer(quadratic).dat** or winter **case2\_winter(quadratic).dat** and also move it into the "Basic configuration" subfolder. (*compare with III.1*)

- Step 5: Execute the algorithm by right-click on the "Basic Configuration" and left-click on the appearing "Run"-Button

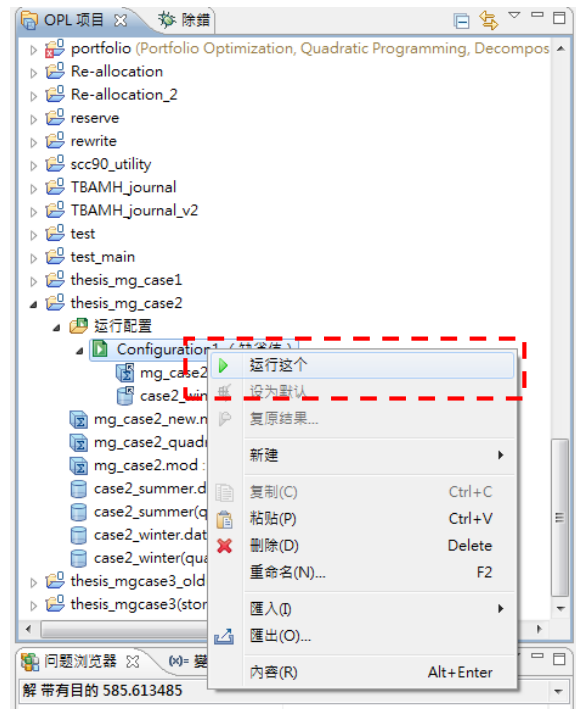

- Step 6: In the "Script Log" to view the results of algorithm

case2\_summer(quadratic).dat

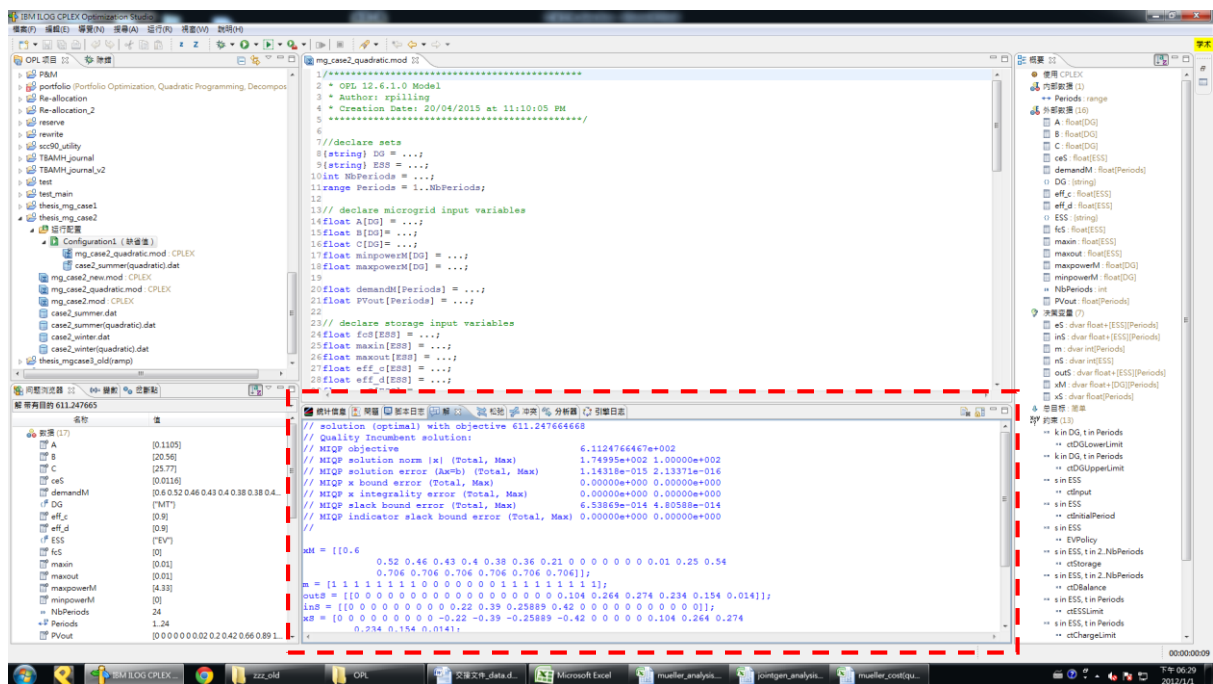

The screenshot displays the IBM ILOG CPLEX Optimizer interface. The main window shows the model file 'mg\_case2\_quadratic.mod'. The 'Solve' button is highlighted. The 'Results' window on the right shows the solution status: 'Quality Incumbent solution: 5.7105953057e+002'. The 'Solution' window at the bottom shows the objective value and various constraints and variables.

| Variable  | Value                                  | Lower Bound | Upper Bound |
|-----------|----------------------------------------|-------------|-------------|
| A         | 0.1109                                 | 0.0         | 0.1         |
| B         | 0.2577                                 | 0.0         | 0.3         |
| C         | 0.0216                                 | 0.0         | 0.1         |
| ceS       | 0.0                                    | 0.0         | 0.0         |
| demandM   | 0.29 0.26 0.25 0.26 0.27 0.28 0.34 0.0 | 0.0         | 0.4         |
| DG        | 0.0                                    | 0.0         | 0.0         |
| effC      | 0.0                                    | 0.0         | 0.0         |
| eff_d     | 0.0                                    | 0.0         | 0.0         |
| fES       | 0.0                                    | 0.0         | 0.0         |
| fcs       | 0.0                                    | 0.0         | 0.0         |
| main      | 0.0                                    | 0.0         | 0.0         |
| maxout    | 0.0                                    | 0.0         | 0.0         |
| maxpowerM | 0.0                                    | 0.0         | 0.0         |
| minpowerM | 0.0                                    | 0.0         | 0.0         |
| NbPeriods | 24                                     | 0.0         | 0.0         |
| Pivout    | 1.24                                   | 0.0         | 0.0         |

## Part 3.3: Utility Generation – CPLEX

- Executive Software
  - ILOG CPLEX Studio IDE @ HPZ400
- Code file in **Part 3 - Operations Research\scc90\_utility**
  - scc90.mod
  - scc90\_summer.dat
  - scc90\_winter.dat
- Description: This optimization algorithm minimizes the standalone generation cost of the utility for summer and winter.
- Steps
  - Step 1: Click the desktop "OPL IDE"
  - Step 2: Expand scc90\_utility by left-click

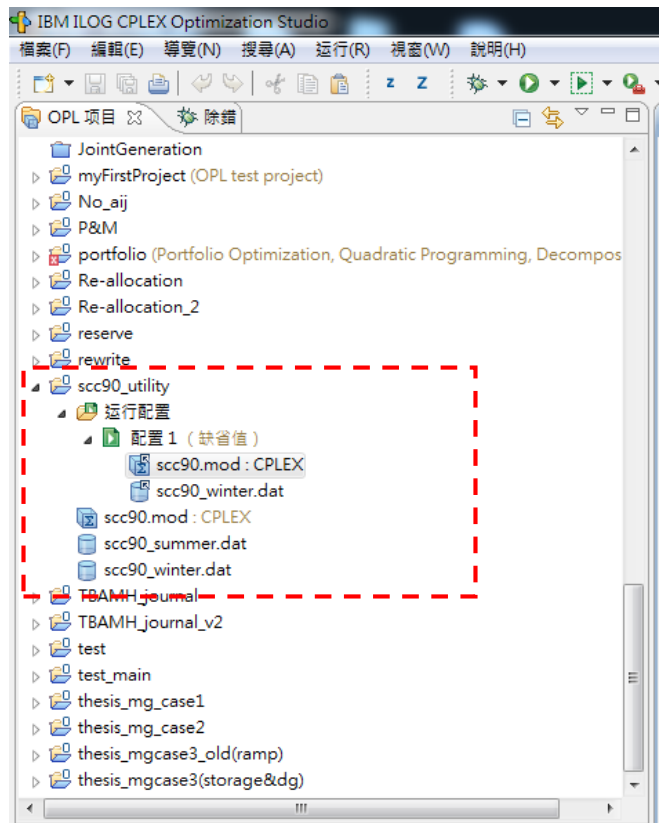

- Step 3: Select the model file **scc90.mod** and move it into the "Basic configuration" subfolder. (*compare with III.1*)
- Step 4: Select the data file for summer **scc90\_summer.dat** or winter **scc90\_winter.dat** and also move it into the "Basic configuration" subfolder. (*compare with III.1*)

- Step 5: Execute the algorithm by right-click on the "Basic Configuration" and left-click on the appearing "Run"-Button

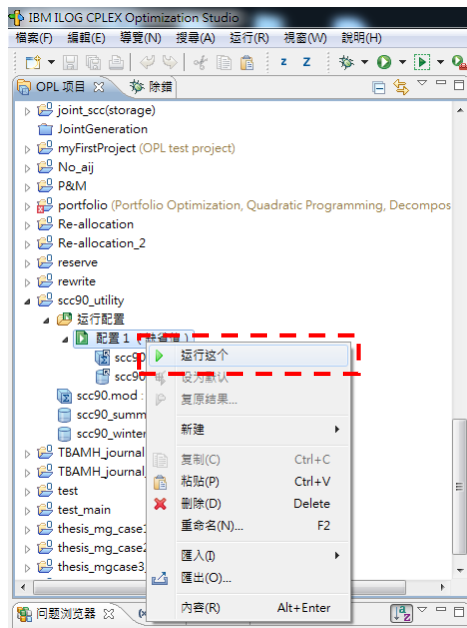

- Step 6: In the "Script Log" to view the results of algorithm

scc90\_summer.dat

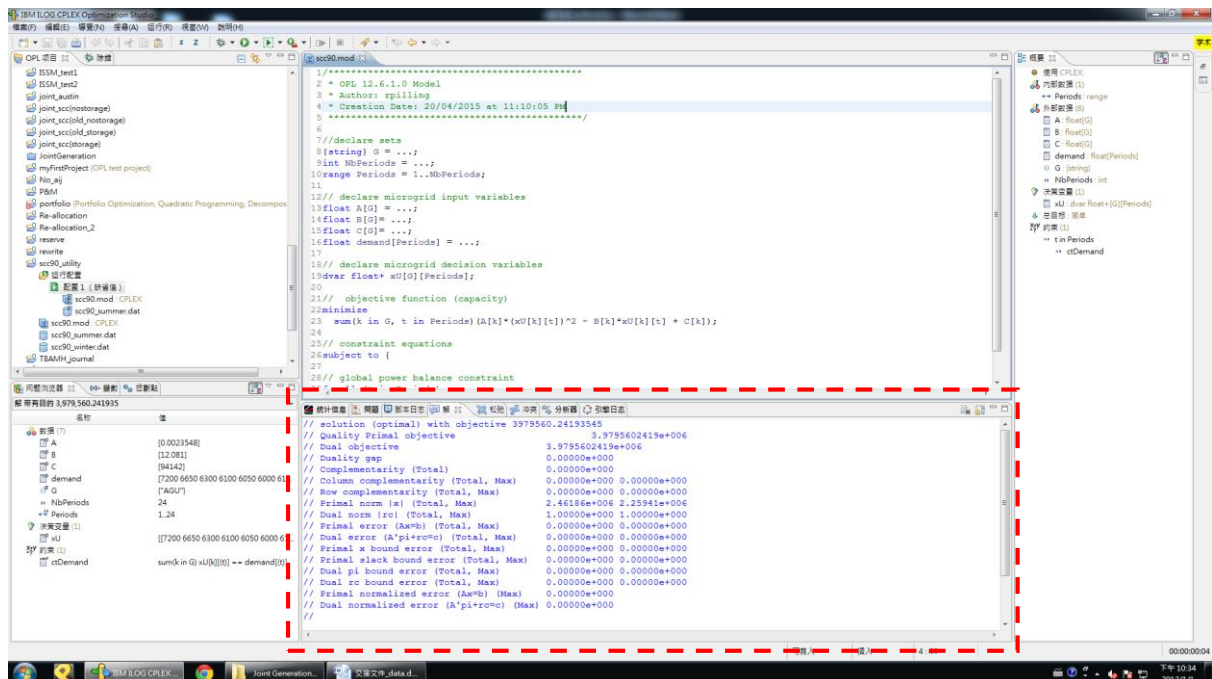

## scc90\_winter.dat

The screenshot displays the IBM ILOG CPLEX Optimizer interface. The main window shows the model file `scc90.mod` with the following code:

```
1 //*****
2 * CPLEX 12.6.1.0 Model
3 * Author: spilling
4 * Creation Date: 20/04/2015 at 11:10:05 PM
5 *****
6
7 //declare sets
8 {string} G = ...;
9 int NbPeriods = ...;
10 range Periods = 1..NbPeriods;
11
12 // declare microgrid input variables
13 float A[G] = ...;
14 float B[G] = ...;
15 float C[G] = ...;
16 float demand[Periods] = ...;
17
18 // declare microgrid decision variables
19 dvar float xU[G][Periods];
20
21 // objective function (capacity)
22 minimize
23   sum(k in G, t in Periods) (A[k]*xU[k][t]^2 - B[k]*xU[k][t] + C[k]);
24
25 // constraint equations
26 subject to {
27
28   // A[k]*xU[k][t] - B[k]*xU[k][t] + C[k] == demand[t]
29   A[k]*xU[k][t] - B[k]*xU[k][t] + C[k] == demand[t];
30 }
```

The left sidebar shows the project structure, including files like `scc90_winter.dat` and `scc90_summer.dat`. The bottom-left pane displays the solution results for the model:

| 名称        | 值                                    |
|-----------|--------------------------------------|
| 目标 (7)    | 2917925.83871                        |
| A         | [0.0020645]                          |
| B         | [7.8355]                             |
| C         | [78526]                              |
| demand    | [4950 4750 4650 4700 4800 4900 5000] |
| G         | [TAGU]                               |
| NbPeriods | 24                                   |
| Periods   | 1..24                                |
| xU        | [4950 4750 4650 4700 4800 4900 5000] |
| 约束 (1)    | sum(k in G) xU[k][t] == demand[t]    |
| 约束 (1)    | ctDemand                             |

The bottom-right pane shows the solver status and various performance metrics:

```
// solution (optimal) with objective 2917925.83870973
// Quality Primal objective 2.9179258387e+006
// Dual objective 2.9179258387e+006
// Quality gap -9.31323e-010
// Complementarity (Total) 0.00000e+000
// Column complementarity (Total, Max) 0.00000e+000
// Row complementarity (Total, Max) 0.00000e+000
// Primal norm (x) (Total, Max) 2.04437e+006
// Dual norm (rc) (Total, Max) 1.00000e+000
// Primal error (A*x-B) (Total, Max) 0.00000e+000
// Dual error (A'*pi-r) (Total, Max) 0.00000e+000
// Primal x bound error (Total, Max) 0.00000e+000
// Primal slack bound error (Total, Max) 0.00000e+000
// Dual pi bound error (Total, Max) 0.00000e+000
// Dual rc bound error (Total, Max) 0.00000e+000
// Primal normalized error (A*x-B) (Max) 0.00000e+000
// Dual normalized error (A'*pi-r) (Max) 0.00000e+000
```

## Part 3.4: Joint Generation (No Storage) – CPLEX

- Executive Software
  - ILOG CPLEX Studio IDE @ HPZ400
- Code file in **Part 3 - Operations Research\joint\_scc(nostorage)**
  - joint\_quadratic\_nostorage.mod
  - joint\_summer(sum).dat
  - joint\_winter(sum).dat
- Description: This optimization algorithm minimizes the joint generation cost of the microgrid and the utility without storage for summer and winter.
- Steps
  - Step 1: Click the desktop "OPL IDE"
  - Step 2: Expand joint\_scc(nostorage) by left-click

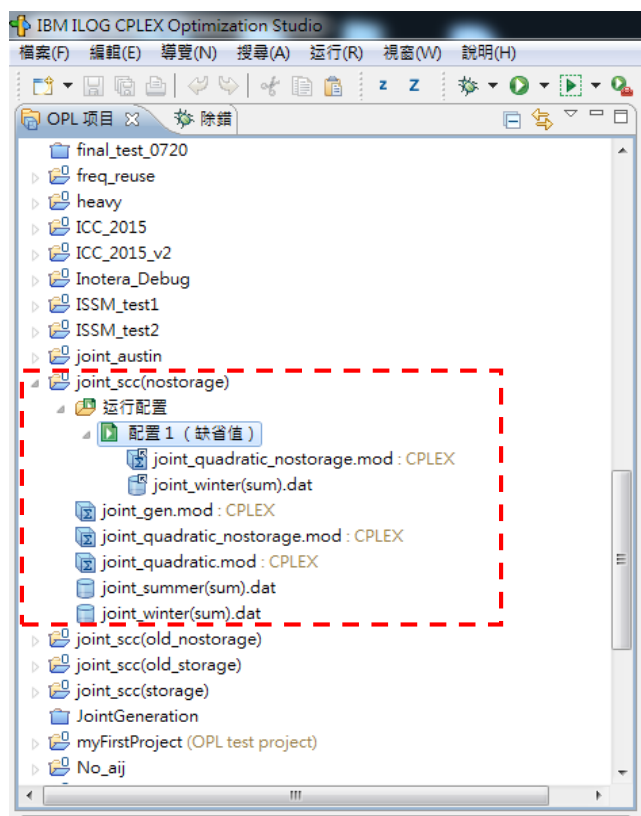

- Step 3: Select the model file **joint\_quadratic\_nostorage.mod** and move it into the "Basic configuration" subfolder. (*compare with III.1*)
- Step 4: Select the data file for summer **joint\_summer(sum).dat** or winter **joint\_winter(sum).dat** and also move it into the "Basic configuration" subfolder. (*compare with III.1*)

- Step 5: Execute the algorithm by right-click on the "Basic Configuration" and left-click on the appearing "Run"-Button

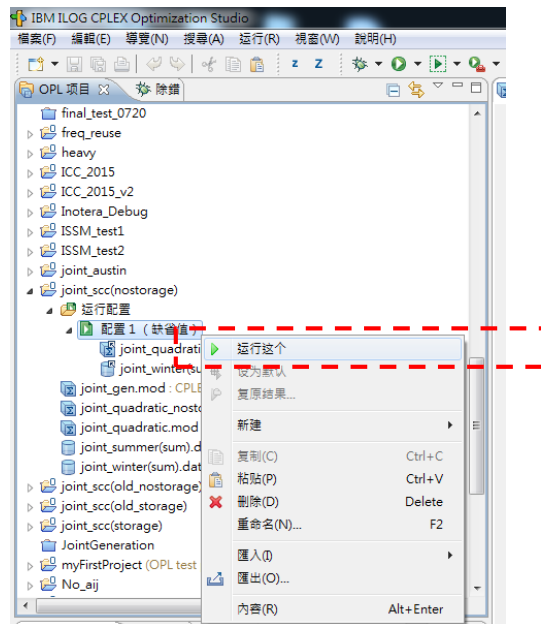

- Step 6: In the "Script Log" to view the results of algorithm

joint\_summer(sum).dat

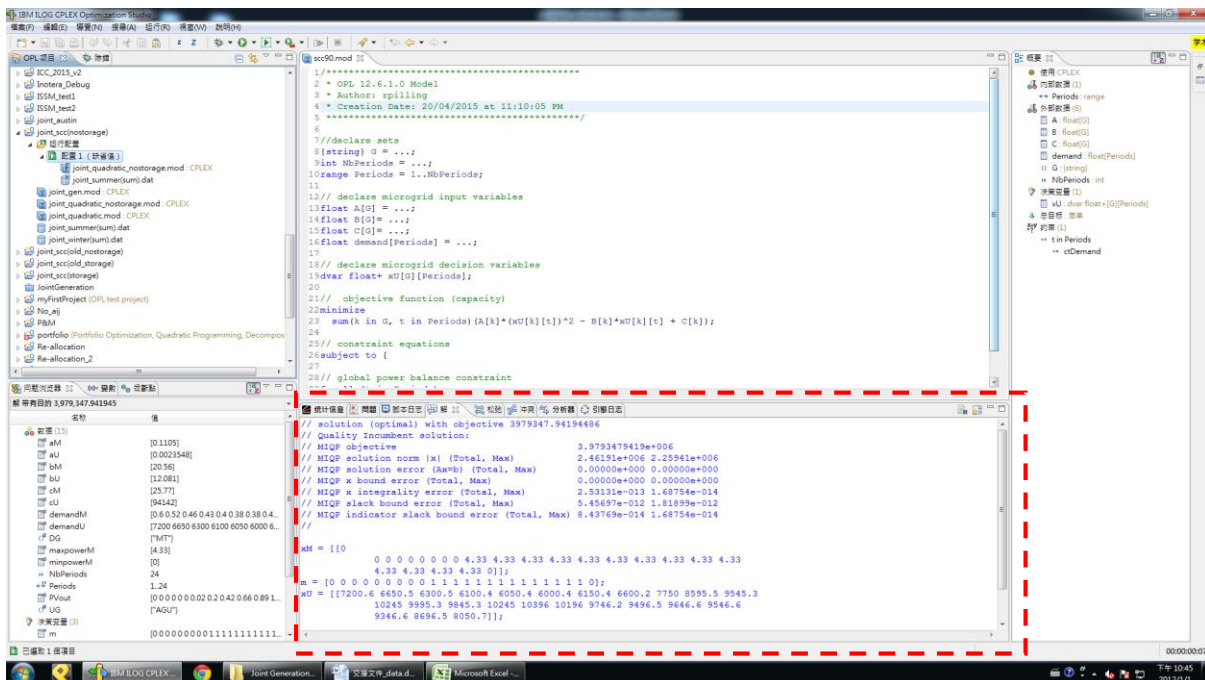

## joint\_winter(sum).dat

The screenshot displays the IBM ILOG CPLEX OptimStudio interface. The main window shows a GAMS model named 'joint\_winter(sum).dat'. The model is defined as follows:

```
1 //*****
2 * GSE 12.6.1.0 Model
3 * Author: spilling
4 * Creation Date: 20/04/2015 at 11:10:05 PM
5 *****
6
7 //declare sets
8 [string] G = ...;
9 int NbPeriods = ...;
10 range Periods = 1..NbPeriods;
11
12 // declare microgrid input variables
13 float A[G] = ...;
14 float B[G] = ...;
15 float C[G] = ...;
16 float demand[Periods] = ...;
17
18 // declare microgrid decision variables
19 float xU[G][Periods];
20
21 // objective function (capacity)
22 minimize
23 sum(k in G, t in Periods) (A[k]*xU[k][t]**2 - B[k]*xU[k][t] + C[k]);
24
25 // constraint equations
26 subject to {
27
28 // global power balance constraint
29
30 }
```

The solution results are displayed in the 'Results' pane, showing the optimal solution with an objective value of 2918013.06244753. The solution is optimal, and the quality of the solution is high. The results are summarized in the following table:

| Variable  | Value                                |
|-----------|--------------------------------------|
| aM        | 10.11051                             |
| aU        | 0.0020645                            |
| bM        | 20.56                                |
| bU        | 7.8355                               |
| cM        | 23.77                                |
| cU        | 78526                                |
| demandM   | 0.29 0.26 0.25 0.26 0.27 0.28 0.34 0 |
| demandU   | 4950.4750 4650.4700 4800.4900 50     |
| FG        | FM77                                 |
| maxpowerM | 4.33                                 |
| minpowerM | 0                                    |
| NbPeriods | 24                                   |
| Periods   | 1..24                                |
| PVout     | 0.00 0.00 0.00 0.00 0.21 0.36 0.47 0 |
| UG        | AGU                                  |

The 'Results' pane also shows the solution for the decision variables xU, which are the optimal values for the microgrid capacity variables. The solution is optimal, and the quality of the solution is high.

## Part 3.5: Joint Generation (Storage) – CPLEX

- Executive Software
  - ILOG CPLEX Studio IDE @ HPZ400
- Code file in **Part 3 - Operations Research\joint\_scc(nostorage)**
  - joint\_quadratic\_storage.mod
  - joint\_summer\_storage.dat
  - joint\_winter\_storage.dat
- Description: This optimization algorithm minimizes the joint generation cost of the microgrid and the utility without storage for summer and winter.
- Steps
  - Step 1: Click the desktop "OPL IDE"
  - Step 2: Expand joint\_scc(storage) by left-click

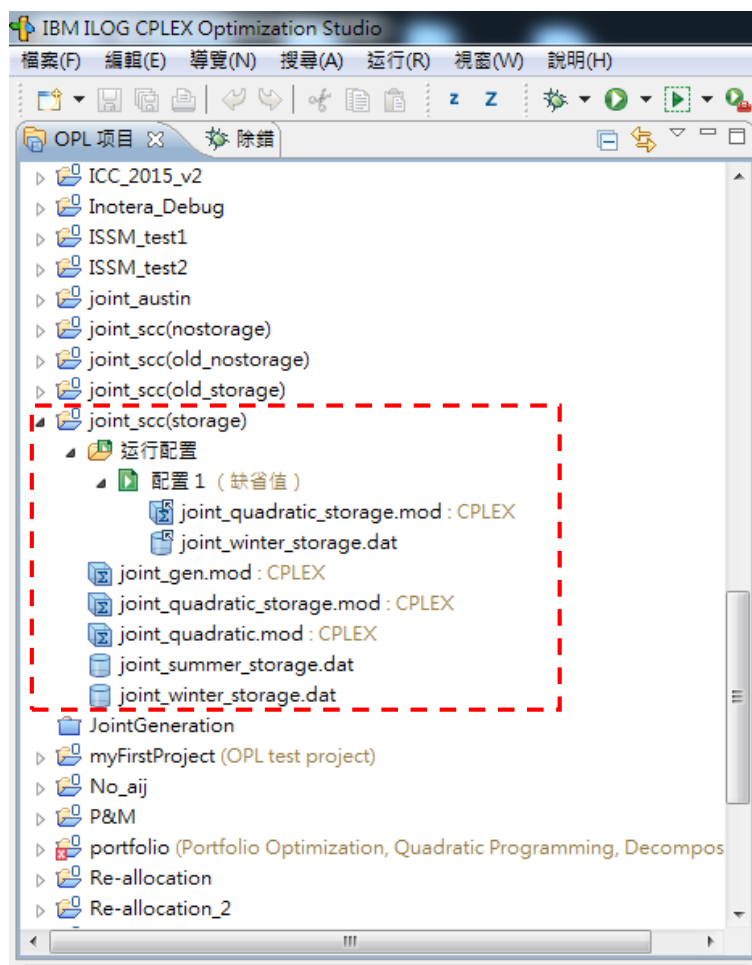

- Step 3: Select the model file **joint\_quadratic\_nostorage.mod** and move it into the "Basic configuration" subfolder. (*compare with III.1*)

- joint\_summer\_storage.dat**

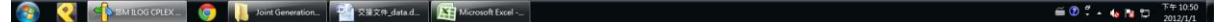

[illegible]
